# Supplementary material for: Dose variation during solar minimum. (Reannouncement with new availability information)
Source: HighWire-hosted journal article supplement (doi:10.1101/gr.277037.122), 1991-12-01
Supplement: Supplemental_Tables_.xlsx [file Supplemental_Tables_.xlsx]

## Sheet: Supplemental Table S1
Supplemental Table S1: Overview of alignment and mapping results of RNA-seq, ATAC-seq, and ChIP-seq assays.
RNA-seq
Time Point	Replicate	Reads pairs	PE mapped uniquely	% mapped uniquely	Overall Alignment		Replicate	Average Depth
P10	Rep1	33704446	28183450	0.8362	0.9644		P10 Rep 1	4.59999
	Rep2	28964798	23525122	0.8122	0.9451		P10 Rep 2	4.65832
	Rep3	28242611	21699920	0.7683	0.9166		P49 Rep 1	3.40246
P49	Rep1	32259653	26293328	0.8151	0.957		P49 Rep 2	3.88172
	Rep2	31597016	26165200	0.8281	0.9623		P90 Rep 1	4.94844
	Rep3	28708683	23272153	0.8106	0.9578		P90 Rep 2	3.67909
P90	Rep1	28933009	23058307	0.797	0.9613		P90 Tech 1	3.37546
	Rep2	29443301	23239326	0.7893	0.9586		P90 Tech 2	3.28119
	Rep3	31318185	24359492	0.7778	0.9481
ATAC-seq
Time Point	Replicate	Reads pairs	PE mapped uniquely	% mapped uniquely	Overall Alignment
P10	Rep1	209316054	156286625	0.7467	0.9775
	Rep2	195225768	147983287	0.758	0.9762
P49	Rep1	175061764	119493527	0.6826	0.9744
	Rep2	187172869	130259085	0.6959	0.9734
P90	Rep1	223104996	163298387	0.7319	0.9734
	Rep2	143176738	108476112	0.7576	0.973
ChIP-seq
Time Point	Replicate	Reads pairs	PE mapped uniquely	% mapped uniquely	Overall Alignment
P49	Rep1	96488727	62526855	0.648	0.8768
	Rep2	89994263	58067636	0.6452	0.9436
	Input1	133741340	95755441	0.716	0.9797
	Input2	131126129	95248806	0.7264	0.9817
P90	Rep1	108381188	79216125	0.7309	0.8954
	Rep2	108624577	89183289	0.821	0.9734
	Input1	122536490	88836650	0.725	0.9823
	Input2	163684203	118545773	0.7242	0.9818

## Sheet: Supplemental Table S2
Supplemental Table S2: List of signature genes from Chung and colleagues (Chung et al., , 2020) with the values used to draw the heatmap
Gene Symbol	Class		Human SHH	Human PB	Mouse Rb/p53 PB	Mouse CyclinD1/p53 P10	Mouse CyclinD1/p53 P49	Mouse CyclinD1/p53 P90	Pineal Gland WT	CBTN	St. Jude PB	St. Jude PC	St. Jude PPTID	St. Jude PT
Aipl1	PB		0	100	68.3931	76.4995	86.9198	89.4437	76.1423	60.7908	74.4519	80.8589	78.2373	67.6245
Mios	PB		0.15588	99.8441	41.91	63.1163	55.5508	53.3937	56.3449	76.6716	66.9067	62.9339	63.0644	69.2867
Usp2	PB		0.304853	99.6951	59.1185	40.5143	31.4701	26.5396	65.2353	83.7313	76.9001	71.5314	71.461	75.4828
Slc12a2	PB		0.339119	99.6609	32.4783	55.627	49.5006	48.0102	79.0177	74.9674	65.0325	56.6219	76.2951	63.4035
Pik3r1	PB		0.41733	99.5827	55.5085	75.1544	60.1502	60.6914	67.4565	88.4638	65.5624	73.2439	73.6705	58.5392
Kirrel2	PB		0.459815	99.5402	44.4527	30.5775	36.429	38.1098	17.4126	33.5349	67.1851	72.946	62.9265	76.9357
Lmod1	PB		0.466557	99.5334	38.5349	14.9377	6.42095	0	34.4751	33.9577	69.0631	77.2648	68.5138	75.5241
Impg2	PB		0.47093	99.5291	100	78.3035	72.8726	70.8063	73.3108	72.124	90.2558	95.2802	92.6138	85.8821
Ahcyl2	PB		0.60475	99.3953	26.0799	40.4658	39.0833	29.9919	82.7483	65.3339	48.6516	65.6459	53.2951	60.7718
Col16a1	PB		0.696753	99.3032	38.5799	48.8111	38.5103	27.7073	64.2331	63.7862	53.2432	75.5398	52.5405	58.8177
Prtg	PB		0.733327	99.2667	72.6143	59.8078	52.3372	48.3895	55.9758	64.2255	65.1059	62.5851	60.0296	72.2911
Sema3f	PB		0.879302	99.1207	57.6395	71.324	67.5065	61.4306	69.5165	80.0092	61.6738	65.9737	68.5324	57.7136
Ptpn13	PB		1.08591	98.9141	46.0611	40.8837	37.1252	25.8238	59.8609	82.0386	74.5965	68.3009	67.4883	72.782
Mgat5	PB		1.08855	98.9114	42.3114	42.558	38.7275	40.6571	57.3719	84.6359	48.8869	69.6152	62.814	57.8525
Lpcat2	PB		1.09809	98.9019	54.9868	48.5082	46.2672	42.6328	57.3997	36.861	48.6088	54.715	49.8408	38.3735
Ankrd33b	PB		1.12896	98.871	64.4051	58.7187	53.1939	50.225	54.5107	60.4064	72.3436	71.1252	76.5818	76.6885
Sox7	PB		1.15209	98.8479	35.6115	37.6078	29.4787	21.9959	29.7529	43.2631	71.8202	56.0714	47.3103	76.4581
Pgm2l1	PB		1.15215	98.8478	47.3874	58.493	49.2137	52.4747	39.1289	67.6154	66.9282	68.7487	52.7481	66.9125
Fhod3	PB		1.19781	98.8022	65.6975	50.3603	43.1512	38.5071	61.9096	75.4346	43.8346	57.8385	53.7663	50.9474
Mink1	PB		1.31	98.69	36.1753	46.5025	48.3734	45.0131	59.3495	86.0019	65.0139	58.7416	63.6176	70.4139
Lhx4	PB		1.31986	98.6801	63.598	68.3256	69.1137	52.4521	78.5959	52.1863	67.3005	68.1955	50.4079	87.0924
Crx	PB		1.3689	98.6311	93.3787	98.0159	92.8561	95.2041	88.7304		84.6433	82.6415	88.6264	86.8911
Pdc	PB		1.42285	98.5772	66.8731	61.1829	56.791	56.9148	43.138		86.4041	30.9431	61.634	86.3217
Cobl	PB		1.54367	98.4563	46.4638	29.1219	21.4384	14.4465	53.7547	75.8743	50.5203	45.0435	45.9103	50.8526
Susd2	PB		1.57215	98.4278	52.9022	54.7847	50.0843	36.3222	37.2968	50.5899	56.6465	50.1483	73.7967	65.2257
Gnb3	PB		1.64413	98.3559	93.9418	100	100	100	100	100	100	100	100	100
Rcvrn	PB		1.6939	98.3061	43.0936	68.4767	60.5565	50.0034			82.124	74.85	92.3504	74.4791
Xist	PB		1.69842	98.3016	58.9813	35.7496	44.395	40.8128	3.91579	0	69.2918	39.8592	72.3345	56.6794
Akap9	PB		1.73767	98.2623	44.1043	58.6846	56.2397	47.4823	67.0861	86.9255	80.0469	77.681	79.4693	84.0125
Uvrag	PB		1.74115	98.2589	46.3604	38.9516	36.3811	31.1038	53.8262	62.3736	37.0769	43.1722	42.4301	37.3626
Nlk	PB		1.78697	98.213	58.2833	63.5032	59.8469	56.1683	65.3981	73.653	60.4612	61.981	57.7418	62.4622
Nr2f6	PB		1.78889	98.2111	37.9512	64.8809	60.429	60.277	54.789	84.7713	58.9517	61.9081	57.1963	55.1391
Robo2	PB		1.82298	98.177	16.9353	27.3606	12.0639	9.1611	44.7679	84.1695	42.8955	52.5643	49.8127	52.5739
Fmn2	PB		1.85033	98.1497	29.9718	21.4137	14.9398	16.9893	24.2137	73.8406	39.8585	59.0161	48.4722	50.8761
Rp1l1	PB		1.88714	98.1129	61.4562	73.4373	71.3162	64.3546	59.6895	15.5251	56.9557	69.1583	61.2701	46.8372
Efr3a	PB		1.92238	98.0776	46.5437	55.1429	53.111	46.5422	66.5439	81.3736	63.489	73.1674	69.3962	67.432
Mpp2	PB		1.92679	98.0732	46.2307	42.2671	48.6389	49.415	49.6913	73.471	56.8329	73.07	67.4118	61.2525
Orai1	PB		1.93125	98.0688	35.133	44.8788	48.3525	39.5331	57.9128	44.0923	49.9876	51.1439	44.552	53.3581
Arid3a	PB		1.93637	98.0636	33.8344	48.5411	43.9163	39.8976	38.8872	51.3643	45.9565	45.502	33.7679	51.6845
Ypel2	PB		2.04563	97.9544	45.0107	58.4089	55.9214	53.7478	55.584	66.2862	63.9909	58.5423	57.8089	68.1549
Kcnh6	PB		2.06346	97.9365	64.7792	64.8816	64.235	55.3061	74.5371	52.4169	68.1793	74.0572	73.8202	77.4214
Mid1	PB		2.06388	97.9361	43.1457	72.6522	70.9625	66.0527	47.7209	63.3588	27.9712	35.3995	30.0421	41.0724
Arfgef1	PB		2.10475	97.8953	46.7884	55.7219	55.6268	52.4603	65.2615	75.1035	64.4318	63.1153	61.7846	64.5715
Myo5a	PB		2.10904	97.891	42.7549	52.4246	47.5328	47.4375	59.7904	72.7266	58.6405	62.2464	55.0303	59.6817
Fam184a	PB		2.22395	97.776	37.245	31.4859	26.1669	16.8894	48.6502	51.9476	56.2	50.3189	55.2131	60.8969
B4galt6	PB		2.27367	97.7263	26.1278	39.4213	39.1765	39.5663	54.533	52.9752	61.5159	62.3658	50.1314	61.9025
Ccdc25	PB		2.30877	97.6912	43.6853	58.2102	56.5731	52.0851	63.8152	67.5386	55.854	61.3462	63.1582	58.8998
Khdrbs3	SHH		97.7715	2.22847	31.1278	32.7479	30.4939	33.6322	48.0127	67.588	27.1473	34.4438	22.4312	18.5491
Cyyr1	SHH		97.8091	2.19095	65.6809	49.1507	40.5791	24.7188	42.9286	18.4983	16.0906	31.6668	23.8975	29.0819
Lrrn1	SHH		97.8413	2.15874	19.6887	40.2296	35.4354	34.4579	36.6659	61.7348	29.4463	50.5135	21.7149	38.52
Nptx2	SHH		97.8471	2.15291	49.9497	61.0891	60.6634	50.4703	44.7454	74.7432	45.4305	39.7842	40.1118	67.5682
Aldh1a3	SHH		97.9217	2.0783	38.6948	0	11.8856	1.70821	19.6176	2.41314	29.4573	52.5412	32.4712	33.7507
Nmu	SHH		97.9475	2.05248	57.5948	6.40797	0			44.1674	6.28451	0	8.30975	25.5158
Fzd7	SHH		97.9522	2.04777	20.5336	66.546	61.2413	46.5984	64.4861	50.9554	51.9273	73.5701	54.6174	40.983
Fat1	SHH		97.9558	2.04416	35.4542	48.5895	47.5432	38.2944	66.7517	49.462	46.7965	48.304	40.0315	43.9493
Pgbd5	SHH		97.9808	2.01917	36.5248	47.2718	50.6208	45.2721	55.6275	56.251	38.2911	49.0425	36.0618	46.7019
Prox1	SHH		97.9979	2.00214	17.4388	19.4767	24.1299	23.0673	24.2623	31.5669	31.0412	40.1284	22.5737	31.4619
Med30	SHH		98.0156	1.98438	32.1796	61.6723	54.9163	51.1929	62.6594	58.3598	36.3527	42.8083	41.0976	39.6787
Igfbpl1	SHH		98.0325	1.9675	3.06671	61.6723	54.9163	51.1929	7.37547	66.5655	38.1734	54.6814	48.1581	45.6381
Hrk	SHH		98.0843	1.91566	31.2033	27.8728	28.2156	32.7243	0	4.85451	32.6468	37.5671	37.985	34.7677
B3gnt5	SHH		98.1123	1.88774	32.1553	70.0316	45.9893	37.9648	36.0452	15.6014	27.5974	40.3723	30.2042	22.4721
Bri3	SHH		98.1363	1.86365	30.7257	29.3272	24.6846	16.2377	62.5461	96.052	41.1489	48.1073	38.2543	47.0038
Grasp	SHH		98.1385	1.86154	34.7562	47.6476	39.9275	44.28	41.2024	49.1251	44.7191	50.1791	51.2889	48.1746
Asap1	SHH		98.1551	1.8449	43.1561	38.822	32.423	29.1061	55.4611	80.6771	30.8386	42.9187	37.4008	27.2996
Gpm6a	SHH		98.3115	1.68849	4.26343	44.5394	41.9282	47.6028	73.5359	79.9613	41.7027	46.9977	23.2299	58.8819
Rnd3	SHH		98.3469	1.65308	28.1593	73.6764	61.0581	51.4646	56.0603	49.2203	44.4995	42.0468	41.7146	32.4524
Dzip1	SHH		98.3635	1.63651	24.5526	34.9705	32.5968	33.3075	50.9414	73.6687	42.7475	59.1262	46.3675	57.9873
St8sia4	SHH		98.3703	1.62968	36.578	25.2826	23.9447	19.7263	40.9559	21.138	24.0596	28.655	27.2684	20.6994
Barhl1	SHH		98.4167	1.58335	0	21.7386		8.45836			39.4865	23.3726	0	11.5234
Dpm1	SHH		98.4305	1.56945	43.9043	20.6294	14.8198	7.41945	52.5752	56.7956	51.7327	55.7342	53.8216	56.5002
Cnn3	SHH		98.4861	1.5139	32.6318	21.3833	34.2988	14.9534	81.9396	81.1413	52.9666	60.1604	58.5102	58.3622
Pde10a	SHH		98.549	1.45097	31.7549	13.6892	10.5759	11.6838	40.8155	2.68766	0	49.9806	4.58616	0
Cdk2ap1	SHH		98.5746	1.42539	28.6372	61.9391	56.0781	53.0568	58.5868	82.0194	49.107	61.5495	55.8969	50.3979
Hsd11b2	SHH		98.5915	1.40853	18.5757	51.8534	37.9226	35.6226		35.079	24.54	33.4373	40.7947	48.3728
B4galt5	SHH		98.6046	1.39538	37.5016	45.2808	43.8646	42.4774	51.487	61.2032	46.8603	42.5471	46.59	50.0446
Metrn	SHH		98.6854	1.3146	24.5875	37.096	34.0587	28.5554	64.1159	60.8049	42.9034	64.5339	48.7294	45.5009
Aldh1l2	SHH		98.7085	1.29152	29.4256	36.1564	39.5629	33.2995	30.881	6.85593	28.3545	30.1078	27.9723	27.6372
Hsd17b11	SHH		98.7252	1.27477	31.4539	26.8649	29.2069	21.3211	59.5946	54.614	38.5548	31.1094	30.6603	27.7881
Fjx1	SHH		98.7989	1.2011	27.1282	60.0626	56.7547	57.6966	25.6335	73.1239	57.3562	53.7326	52.7017	60.9903
Farp1	SHH		98.902	1.09799	34.6146	42.1067	35.9984	32.1656	50.6522	68.3236	42.8047	60.7451	49.7006	31.4557
Plin2	SHH		98.9673	1.03267	47.2762	56.1188	47.8485	43.5379	60.2721	38.3857	44.1453	34.1371	31.4256	41.2506
Frmd4a	SHH		99.0835	0.916501	36.1124	34.55	29.4223	24.6174	49.9537	56.3574	15.5202	28.2987	31.2003	13.8874
Fam107b	SHH		99.1104	0.889617	48.8184	51.2108	51.8683	54.607	71.0585	51.52	21.9351	29.1754	20.3757	22.8341
Mtap	SHH		99.2918	0.708228	41.4978	45.1873	41.5764	35.6274	49.4644	40.8267	23.3153	29.5663	21.6847	21.0548
Prkd3	SHH		99.3119	0.688144	43.6304	56.9932	48.4541	44.6291	55.1043	42.8004	47.2329	40.1935	35.4751	45.8469
Crtap	SHH		99.3881	0.611856	33.0095	48.2728	41.0581	33.1924	60.0278	72.2913	54.4008	70.6717	58.6007	63.5805
Ntan1	SHH		99.392	0.607979	31.1777	61.1032	54.9814	48.6415	63.7422	44.1277	45.2516	48.763	38.1535	47.9123
Arhgap21	SHH		99.6239	0.376141	37.2895	56.8078	45.7314	42.9831	57.2193	75.2565	58.3121	57.0324	39.728	68.5548
Diras1	SHH		99.7212	0.278781	33.4791	41.648	45.9304	53.4881	19.8979	47.1213	60.3485	62.3896	39.5344	62.2141
Cdk6	SHH		99.8038	0.196196	2.46591	21.9992	23.5647	13.8439	48.3399	74.4911	60.7948	58.9211	57.356	76.5831
Boc	SHH		99.9735	0.0264661	11.3197	37.4959	31.5275	18.8497	62.1833	56.2922	36.4752	50.3018	33.629	27.4953
Gjc1	SHH		100	0	24.5461	50.4449	36.9246	34.5967	44.7335	60.6178	45.8761	38.7953	39.2103	58.2647

## Sheet: Supplemental Table S3
Supplemental Table S3: DESeq2 output for genes at P49 vs. P10 time-point comparison.
DESeq2 output P49 vs P10 (RNA-seq)
gene_id	gene_name	baseMean	log2FoldChange	lfcSE	stat	pvalue	padj	mean_tpm_p49	mean_tpm_p10
ENSMUSG00000051951	Xkr4	1105.64	-0.339568	0.606398	-0.559976	0.575496	0.786765	0.466	0.523
ENSMUSG00000103147	Gm7341	2.13309	0.997896	1.45521	0.68574	0.492877	NA	0.595	0.278
ENSMUSG00000102343	Gm37381	15.253	-0.844856	0.889707	-0.949588	0.342321	0.604402	0.041	0.068
ENSMUSG00000025900	Rp1	10893.9	-1.0758	0.790159	-1.3615	0.173355	0.414814	4.573	9.038
ENSMUSG00000025902	Sox17	23.5293	-0.204811	0.631845	-0.324148	0.745826	0.885751	0.578	0.62
ENSMUSG00000098104	Gm6085	28.6713	-1.08836	0.482589	-2.25525	0.0241175	0.118945	2.307	4.396
ENSMUSG00000103922	Gm6123	71.1032	-0.0531147	0.383038	-0.138667	0.889713	0.954452	16.263	14.798
ENSMUSG00000033845	Mrpl15	1231.15	0.000753889	0.166401	0.00453055	0.996385	0.999977	20.071	17.827
ENSMUSG00000104217	Gm37988	9.51353	0.253289	0.758615	0.333883	0.738468	0.881884	0.025	0.019
ENSMUSG00000033813	Tcea1	1902.35	0.0501759	0.126141	0.397776	0.690796	0.855655	9.59	8.379
ENSMUSG00000062588	Gm6104	44.0902	-0.90988	0.452252	-2.01189	0.044232	0.177348	11.711	19.208
ENSMUSG00000103280	Gm37277	12.7813	1.01888	0.832067	1.22452	0.220756	0.476695	2.053	0.948
ENSMUSG00000002459	Rgs20	302.817	1.05635	0.334734	3.1558	0.00160061	0.0173589	0.413	0.183
ENSMUSG00000085623	Gm16041	4.83576	0.335319	1.03647	0.323519	0.746302	0.885781	0.126	0.095
ENSMUSG00000033793	Atp6v1h	3667.75	0.215284	0.198313	1.08558	0.277666	0.540835	8.747	6.905
ENSMUSG00000025905	Oprk1	2.93926	-0.627441	1.42638	-0.439882	0.660022	NA	0.033	0.044
ENSMUSG00000033774	Npbwr1	7.76872	-1.91666	1.25208	-1.53079	0.125822	0.342842	0.15	0.522
ENSMUSG00000025907	Rb1cc1	4238.17	-0.0491469	0.176362	-0.27867	0.780498	0.901625	12.087	11.499
ENSMUSG00000090031	4732440D04Rik	106.572	0.131092	0.323998	0.404608	0.685765	0.853031	3.73	3.155
ENSMUSG00000103845	Gm19026	17.6537	0.268967	0.543703	0.494695	0.620815	0.816187	0.341	0.263
ENSMUSG00000033740	St18	43.4182	0.270821	0.764378	0.354302	0.723112	0.873643	0.032	0.022
ENSMUSG00000102135	Gm37108	5.12299	0.175973	0.908774	0.193638	0.84646	0.935275	0.172	0.133
ENSMUSG00000051285	Pcmtd1	2190.88	0.306785	0.205687	1.49152	0.135825	0.359373	6.296	4.693
ENSMUSG00000048538	Gm9826	75.8146	-0.0549648	0.522891	-0.105117	0.916283	0.967074	12.999	12.032
ENSMUSG00000097797	Gm26901	28.5793	-0.0628364	0.443389	-0.141719	0.887302	0.953264	0.134	0.128
ENSMUSG00000025909	Sntg1	102.575	-0.0111894	0.68982	-0.0162208	0.987058	0.996017	0.006	0.005
ENSMUSG00000076135	Gm24276	1.93258	0.821842	1.84415	0.445647	0.655852	NA	3.177	1.624
ENSMUSG00000061024	Rrs1	570.169	0.214706	0.159031	1.35009	0.176987	0.419945	60.762	46.782
ENSMUSG00000025911	Adhfe1	65.1667	-0.197001	0.458978	-0.429216	0.667766	0.842776	0.268	0.277
ENSMUSG00000079671	2610203C22Rik	8.4464	-1.67904	0.787526	-2.13204	0.0330032	0.147067	0.012	0.035
ENSMUSG00000067879	Vxn	254.24	-0.846876	0.944409	-0.896726	0.369865	0.629153	0.058	0.093
ENSMUSG00000025912	Mybl1	1090.49	-1.4021	0.231249	-6.06313	1.33498e-09	2.05566e-07	4.184	9.851
ENSMUSG00000045210	Vcpip1	2650.25	0.029497	0.158957	0.185565	0.852786	0.938287	18.968	16.95
ENSMUSG00000097893	1700034P13Rik	18.2154	0.246996	0.576633	0.428342	0.668402	0.843042	0.08	0.06
ENSMUSG00000025915	Sgk3	260.775	-0.0685956	0.334889	-0.204831	0.837704	0.931143	0.487	0.447
ENSMUSG00000046334	Gm6195	22.1882	-0.599099	0.529236	-1.13201	0.257631	0.519871	9.748	13.268
ENSMUSG00000046101	Mcmdc2	11.371	0.239535	0.549746	0.43572	0.66304	0.840456	0.074	0.056
ENSMUSG00000098234	Snhg6	431.86	-0.375924	0.252952	-1.48615	0.13724	0.361147	37.42	43.467
ENSMUSG00000099032	Tcf24	62.6928	-0.933488	0.709017	-1.3166	0.187974	0.434486	1.439	2.334
ENSMUSG00000025916	Ppp1r42	98.8271	-0.138705	0.522568	-0.265431	0.790678	0.906983	0.458	0.468
ENSMUSG00000025917	Cops5	2176.27	-0.0922021	0.156684	-0.58846	0.556224	0.774492	31.166	29.924
ENSMUSG00000056763	Cspp1	1103.41	-0.316322	0.179781	-1.75949	0.0784946	0.256908	2.006	2.275
ENSMUSG00000067851	Arfgef1	3421.07	0.604807	0.163614	3.69655	0.000218551	0.00381667	8.635	5.139
ENSMUSG00000042501	Cpa6	2.67876	2.97137	1.66445	1.7852	0.0742296	NA	0.002	0
ENSMUSG00000048960	Prex2	689.943	0.431408	0.505022	0.854236	0.392974	0.648677	0.361	0.242
ENSMUSG00000057715	A830018L16Rik	169.036	-0.590147	0.826166	-0.71432	0.475029	0.714265	0.022	0.03
ENSMUSG00000016918	Sulf1	553.75	-1.15563	0.477096	-2.42222	0.0154262	0.0877452	0.53	1.043
ENSMUSG00000025938	Slco5a1	12.8466	0.522958	0.849958	0.615275	0.538373	0.762893	0.017	0.011
ENSMUSG00000005886	Ncoa2	3054.33	-0.249586	0.205722	-1.21322	0.225045	0.482041	2.512	2.723
ENSMUSG00000101476	Gm29570	3.09578	-1.52593	1.17474	-1.29895	0.193961	NA	0.027	0.074
ENSMUSG00000025935	Tram1	3124.66	-0.0448829	0.140049	-0.32048	0.748605	0.8863	27.53	25.53
ENSMUSG00000025937	Lactb2	244.565	0.863529	0.238724	3.61727	0.000297727	0.00482178	1.969	0.98
ENSMUSG00000097711	Gm5523	1.47607	-2.27264	1.64663	-1.38018	0.167531	NA	0.142	0.601
ENSMUSG00000102166	Gm36947	3.07396	-1.89496	1.2604	-1.50345	0.132722	NA	0.163	0.521
ENSMUSG00000025932	Eya1	74.0614	0.494992	0.482654	1.02556	0.305098	0.57017	0.149	0.093
ENSMUSG00000054493	Gm9947	1.96088	-0.539199	1.65298	-0.326198	0.744275	NA	0.01	0.011
ENSMUSG00000025930	Msc	9.93723	1.76158	1.2893	1.36631	0.171841	0.413243	1.374	0.322
ENSMUSG00000081201	Smt3h2-ps4	3.47611	-0.813478	1.01847	-0.798724	0.424451	NA	1.755	2.677
ENSMUSG00000082193	Rpl5-ps1	6.5438	0.0458968	0.758036	0.060547	0.95172	0.98265	1.5	1.292
ENSMUSG00000032769	Trpa1	1.25606	0.377871	2.32435	0.162571	0.870856	NA	0.007	0.004
ENSMUSG00000073737	Gm10566	1.69546	-1.28831	1.88816	-0.68231	0.495043	NA	0.201	0.491
ENSMUSG00000092083	Kcnb2	2534	-1.51405	0.496775	-3.04777	0.00230547	0.0227406	0.67	1.775
ENSMUSG00000025925	Terf1	673.151	-0.708571	0.196759	-3.60122	0.000316729	0.00503291	2.778	4.094
ENSMUSG00000104379	Gm37509	15.704	-0.78511	0.533356	-1.47202	0.141016	0.367247	0.786	1.254
ENSMUSG00000032719	Sbspon	7.54583	-1.19653	0.980812	-1.21994	0.222489	0.478639	0.03	0.066
ENSMUSG00000067795	4930444P10Rik	6.48876	-0.0150768	1.13966	-0.0132292	0.989445	0.996639	0.051	0.046
ENSMUSG00000043716	Rpl7	16369.1	-0.371247	0.25062	-1.48131	0.138523	0.362849	891.409	1020.75
ENSMUSG00000025921	Rdh10	316.382	0.109099	0.204288	0.534042	0.593313	0.799351	2.618	2.172
ENSMUSG00000025920	Stau2	1470.83	0.314428	0.207024	1.5188	0.128812	0.347064	1.161	0.861
ENSMUSG00000025939	Ube2w	1369.71	0.222546	0.15448	1.44061	0.149696	0.381056	3.819	2.974
ENSMUSG00000102457	Gm38342	5.41062	-0.133091	0.872662	-0.152512	0.878783	0.950111	0.308	0.305
ENSMUSG00000079658	Eloc	1591.73	-0.263218	0.129086	-2.03909	0.0414407	0.170412	19.552	21.261
ENSMUSG00000097744	D030040B21Rik	3.79681	-0.669778	1.18333	-0.566014	0.571385	NA	0.107	0.149
ENSMUSG00000100959	Gm7654	1.82659	0.567696	1.66877	0.340188	0.733715	NA	0.589	0.386
ENSMUSG00000025940	Tmem70	790.271	0.0438299	0.157111	0.278975	0.780264	0.901625	11.754	10.222
ENSMUSG00000025779	Ly96	22.2915	0.134658	0.419086	0.321315	0.747972	0.886113	0.246	0.2
ENSMUSG00000091020	Gm5828	5.07849	0.972399	2.13066	0.456384	0.648114	0.831707	0.94	0.359
ENSMUSG00000101640	Gm28376	6.07679	1.96512	1.42557	1.37848	0.168055	0.408653	0.003	0.001
ENSMUSG00000042686	Jph1	398.167	-1.19472	0.461426	-2.5892	0.00962005	0.062993	0.424	0.84
ENSMUSG00000025777	Gdap1	1193.32	0.880392	0.197007	4.46885	7.86425e-06	0.000275917	12.224	5.932
ENSMUSG00000099899	Gm28784	1.41308	2.66842	2.26346	1.17891	0.238434	NA	0.104	0.014
ENSMUSG00000101589	Rbm6-ps1	20.9484	-0.48721	0.455736	-1.06906	0.285043	0.548292	1.29	1.653
ENSMUSG00000067780	Pi15	30.7585	-3.75021	0.809661	-4.63183	3.62456e-06	0.00014898	0.05	0.573
ENSMUSG00000085125	Gm16070	4.95265	-1.89954	1.09622	-1.73282	0.0831282	0.267117	0.011	0.036
ENSMUSG00000025776	Crispld1	109.182	-1.83166	0.689773	-2.65545	0.00792027	0.0550785	0.385	1.192
ENSMUSG00000109887	Gm28756	2.27046	-1.01437	1.82491	-0.555844	0.578318	NA	0.004	0.008
ENSMUSG00000089787	Gm15825	107.388	-0.692907	0.871666	-0.794922	0.426659	0.678694	0.473	0.743
ENSMUSG00000042596	Tfap2d	337.483	-1.61696	0.806737	-2.00432	0.045036	0.179386	0.686	2.048
ENSMUSG00000100720	Gm10075	2.57444	-1.5131	1.38907	-1.08929	0.276025	NA	0.667	1.654
ENSMUSG00000025927	Tfap2b	15.0738	-0.77013	0.694423	-1.10902	0.267421	0.53055	0.114	0.172
ENSMUSG00000100204	Gm4849	5.78897	-0.35597	0.840348	-0.423598	0.671859	0.845337	0.568	0.64
ENSMUSG00000043760	Pkhd1	5.80125	-0.507397	0.977823	-0.518905	0.603827	0.806006	0.002	0.003
ENSMUSG00000041872	Il17f	16.1678	-1.48506	0.584219	-2.54196	0.0110234	0.0693726	0.14	0.363
ENSMUSG00000041859	Mcm3	3362.02	-0.549175	0.41382	-1.32709	0.18448	0.429376	32.606	41.768
ENSMUSG00000025931	Paqr8	503.153	1.6437	0.499447	3.29103	0.000998197	0.0121044	1.317	0.38
ENSMUSG00000100929	Gm28064	1.30097	0	2.99965	0	1	NA	0	0
ENSMUSG00000041809	Efhc1	198.589	-0.402697	0.320705	-1.25566	0.209239	0.461902	1.032	1.219
ENSMUSG00000041779	Tram2	52.7742	-0.016291	0.409637	-0.0397694	0.968277	0.988972	0.151	0.132
ENSMUSG00000099971	Gm28287	2.20914	-1.25369	1.4409	-0.870071	0.384262	NA	0.166	0.377
ENSMUSG00000100819	Gm2693	11.144	0.130885	0.781797	0.167416	0.867043	0.944917	0.272	0.228
ENSMUSG00000025933	Tmem14a	146.045	0.543919	0.222167	2.44824	0.0143554	0.0835731	2.745	1.708
ENSMUSG00000102633	Gm38224	1.22166	-1.3384	1.78909	-0.748091	0.454405	NA	0.062	0.154
ENSMUSG00000025934	Gsta3	39.1833	1.29838	0.519448	2.49954	0.0124354	0.0755151	0.575	0.222
ENSMUSG00000099343	Gm28836	1.51979	1.47652	2.03121	0.726913	0.467279	NA	0.01	0.003
ENSMUSG00000096375	Gm7094	1.81795	0.512802	1.44795	0.354156	0.723222	NA	1.08	0.733
ENSMUSG00000028033	Kcnq5	218.902	-0.749893	0.866882	-0.865046	0.387014	0.644259	0.021	0.032
ENSMUSG00000041670	Rims1	305.903	1.11552	0.891221	1.25168	0.210687	0.463489	0.044	0.017
ENSMUSG00000101227	Gm29506	6.75765	0.529972	0.939247	0.564252	0.572582	0.785168	0.009	0.006
ENSMUSG00000102766	Gm6420	2.42812	0.114673	1.07888	0.10629	0.915353	NA	0.889	0.728
ENSMUSG00000065405	Mir30a	1.77184	-0.26333	1.51881	-0.17338	0.862353	NA	3.824	4.459
ENSMUSG00000097970	Gm27028	4.99312	-0.64751	1.17886	-0.549269	0.582821	0.791745	1.83	2.816
ENSMUSG00000026158	Ogfrl1	593.943	-0.0530188	0.285971	-0.185399	0.852916	0.938299	3.469	3.259
ENSMUSG00000026156	B3gat2	19.5306	-0.638292	0.636054	-1.00352	0.31561	0.580078	0.036	0.053
ENSMUSG00000026155	Smap1	1544.52	-0.168622	0.123729	-1.36284	0.172934	0.414365	3.918	3.998
ENSMUSG00000026154	Sdhaf4	569.597	0.0155197	0.21691	0.0715491	0.942961	0.978781	12.589	11.456
ENSMUSG00000026153	Fam135a	2166.45	-0.0863706	0.149878	-0.576272	0.564432	0.780327	5.081	4.887
ENSMUSG00000102398	Gm37580	11.7946	-0.768597	0.608261	-1.2636	0.206374	0.457923	0.549	0.854
ENSMUSG00000026147	Col9a1	8.23222	-2.48957	0.760906	-3.27185	0.00106847	0.0127415	0.008	0.038
ENSMUSG00000026141	Col19a1	38.5704	0.859597	0.670209	1.28258	0.199639	0.449507	0.022	0.011
ENSMUSG00000099997	Tubb4b-ps2	8.81895	-0.178902	0.661298	-0.270532	0.786751	0.905048	1.252	1.286
ENSMUSG00000100131	Gm28439	97.9582	1.00691	0.369562	2.7246	0.00643788	0.0478307	35.677	16.432
ENSMUSG00000067736	Gm10222	23.564	1.51741	0.613157	2.47475	0.0133329	0.0793162	28.709	9.283
ENSMUSG00000101939	Gm28438	407.136	0.437394	0.318933	1.37143	0.170241	0.411293	318.035	217.47
ENSMUSG00000101111	Gm28437	2103.81	0.412454	0.251188	1.64201	0.100587	0.299464	707.39	485.802
ENSMUSG00000100862	Gm10925	952.489	0.771514	0.254337	3.03343	0.00241789	0.0235502	406.959	217.682
ENSMUSG00000102070	Gm28661	811.919	0.527833	0.270841	1.94887	0.0513112	0.195434	315.687	201.129
ENSMUSG00000101249	Gm29216	1213.39	0.366027	0.249892	1.46474	0.142992	0.370462	603.763	426.573
ENSMUSG00000073725	Lmbrd1	2680.15	0.548573	0.247727	2.21443	0.0267992	0.127516	8.019	5.065
ENSMUSG00000033569	Adgrb3	1155.94	-0.732192	0.438159	-1.67107	0.0947086	0.289128	0.22	0.324
ENSMUSG00000104516	Gm9884	4.35691	-1.22764	1.02331	-1.19967	0.230267	0.488533	0.508	1.11
ENSMUSG00000086240	Gm7846	43.5512	-0.270878	0.342328	-0.791282	0.42878	0.67995	28.322	30.774
ENSMUSG00000081557	Gm5697	2.05254	0.000362709	1.31935	0.000274915	0.999781	NA	0.168	0.152
ENSMUSG00000099492	Gm5525	5.29136	0.805552	0.823889	0.977743	0.328201	0.592022	1.175	0.603
ENSMUSG00000100261	Gm6473	11.4088	0.698697	0.726341	0.96194	0.33608	0.598652	1.167	0.673
ENSMUSG00000048874	Phf3	4225.64	-0.0684914	0.175802	-0.389594	0.696837	0.859397	11.85	11.418
ENSMUSG00000117310	Ptp4a1	4.11637	-1.06983	1.14341	-0.93565	0.349454	0.610875	0.052	0.096
ENSMUSG00000117091	Gm5698	1.35202	-2.92436	2.24312	-1.3037	0.192335	NA	0	0.363
ENSMUSG00000086727	4931428L18Rik	3.29511	1.75784	1.5238	1.15359	0.24867	NA	0.005	0.001
ENSMUSG00000070960	Gm19680	13.9546	-0.381446	0.598257	-0.637595	0.523737	0.752986	1.816	2.036
ENSMUSG00000026058	Khdrbs2	66.2913	0.329543	0.762906	0.431957	0.665773	0.841915	0.016	0.011
ENSMUSG00000100481	Gm7114	5.38266	0.834262	0.879136	0.948956	0.342643	0.604793	0.739	0.382
ENSMUSG00000026134	Prim2	1353.06	-0.532971	0.250413	-2.12837	0.0333062	0.147874	1.108	1.417
ENSMUSG00000103746	1700001G17Rik	12.2787	-0.551933	0.564588	-0.977586	0.328279	0.592022	2.325	3.004
ENSMUSG00000004768	Rab23	362.956	-0.0538265	0.168935	-0.318622	0.750013	0.886923	3.185	3.016
ENSMUSG00000042215	Bag2	186.037	0.176016	0.346575	0.507872	0.611543	0.810185	3.779	3.072
ENSMUSG00000042197	Zfp451	2459.37	-0.157178	0.125706	-1.25036	0.211167	0.464046	8.763	8.811
ENSMUSG00000081402	Gm15455	4.69254	-0.867384	0.898677	-0.965179	0.334455	0.597465	0.304	0.496
ENSMUSG00000042182	Bend6	160.56	0.17251	0.571946	0.301619	0.762942	0.892167	0.416	0.335
ENSMUSG00000026131	Dst	7328.46	0.94042	0.191974	4.89869	9.64795e-07	4.92604e-05	3.167	1.513
ENSMUSG00000096992	Gm26788	53.6601	-0.240279	0.646994	-0.371377	0.710357	0.867086	0.991	1.094
ENSMUSG00000101462	Gm3052	13.9176	1.14783	0.711918	1.61231	0.106895	0.310522	1.128	0.483
ENSMUSG00000102336	Gm37233	124.352	0.18538	0.355239	0.521848	0.601776	0.805063	3.702	3.008
ENSMUSG00000042111	Ccdc115	1035.75	-0.430183	0.161595	-2.6621	0.00776546	0.0543569	63.129	76.814
ENSMUSG00000026127	Imp4	1023.39	-0.0108935	0.149787	-0.0727268	0.942024	0.978288	23.862	21.684
ENSMUSG00000026126	Ptpn18	63.7222	-0.484385	0.470984	-1.02846	0.303736	0.568721	0.737	0.938
ENSMUSG00000100280	Gm28417	3.34699	0.0156695	1.00792	0.0155464	0.987596	NA	0.165	0.145
ENSMUSG00000045174	Amer3	92.9402	0.424021	0.395221	1.07287	0.283329	0.546824	1.099	0.733
ENSMUSG00000037509	Arhgef4	984.914	0.114383	0.388602	0.294346	0.768494	0.894959	1.592	1.362
ENSMUSG00000104002	Gm38336	11.9423	-1.05308	0.64488	-1.63299	0.102471	0.302656	0.635	1.201
ENSMUSG00000037503	Fam168b	7826.99	-0.430305	0.148868	-2.89051	0.00384614	0.0331461	48.137	59.1
ENSMUSG00000026123	Plekhb2	11792.7	0.925741	0.356824	2.59439	0.00947595	0.0624075	128.651	63.463
ENSMUSG00000045216	Hs6st1	825.232	0.261111	0.149167	1.75046	0.0800382	0.260236	4.904	3.683
ENSMUSG00000037470	Uggt1	3378.63	0.0369	0.171314	0.215395	0.82946	0.927403	6.848	5.898
ENSMUSG00000047180	Neurl3	56.1704	1.34521	0.510756	2.63376	0.00844446	0.057629	1.606	0.542
ENSMUSG00000037447	Arid5a	225.241	0.314771	0.251488	1.25163	0.210703	0.463489	2.384	1.698
ENSMUSG00000010453	Kansl3	2837.23	-0.0305567	0.120813	-0.252927	0.800325	0.91169	17.144	15.864
ENSMUSG00000037432	Fer1l5	1.07184	-0.468378	1.78389	-0.26256	0.79289	NA	0.004	0.005
ENSMUSG00000001143	Lman2l	802.933	0.176748	0.211165	0.837013	0.402585	0.657377	7.61	6.097
ENSMUSG00000037408	Cnnm4	1226.2	0.567556	0.147137	3.85734	0.000114626	0.00228805	8.221	5.011
ENSMUSG00000001138	Cnnm3	1931.71	-0.629983	0.259711	-2.42571	0.0152784	0.0871603	20.765	28.652
ENSMUSG00000102845	Gm38033	2.54999	-2.8339	1.46322	-1.93676	0.0527747	NA	0.191	1.301
ENSMUSG00000109510	Gm42417	5.5006	-0.769516	0.858697	-0.896143	0.370176	0.629462	0.068	0.105
ENSMUSG00000079610	Ankrd39	163.218	-0.361565	0.196849	-1.83676	0.0662447	0.230585	3.091	3.566
ENSMUSG00000026121	Sema4c	450.618	-0.667159	0.339088	-1.96751	0.0491243	0.189686	7.365	10.376
ENSMUSG00000087589	D430040D24Rik	88.5536	-1.13123	0.39984	-2.82921	0.00466636	0.0378498	1.639	3.291
ENSMUSG00000046337	Fam178b	13.1332	-0.888967	0.646241	-1.3756	0.168946	0.409513	0.016	0.028
ENSMUSG00000061518	Cox5b	3005.08	0.234983	0.195844	1.19984	0.2302	0.488445	291.533	220.918
ENSMUSG00000037351	Actr1b	3458.01	-0.166966	0.125115	-1.33451	0.182037	0.426247	40.676	40.8
ENSMUSG00000102416	4933424G06Rik	18.2795	0.640597	0.539686	1.18698	0.235236	0.495392	0.098	0.057
ENSMUSG00000026117	Zap70	8.18441	0.207339	0.800782	0.25892	0.795697	0.909375	0.061	0.051
ENSMUSG00000026116	Tmem131	1751.13	0.0259924	0.203211	0.127908	0.898222	0.958682	2.349	2.061
ENSMUSG00000050122	Vwa3b	45.2543	-0.898989	0.527851	-1.70311	0.0885476	0.277186	0.039	0.067
ENSMUSG00000026114	Cnga3	1141.22	0.0648079	0.366059	0.177042	0.859475	0.941116	3.492	3.07
ENSMUSG00000026113	Inpp4a	926.276	0.352099	0.26494	1.32897	0.183857	0.428379	1.765	1.267
ENSMUSG00000026112	Coa5	1469.6	0.30645	0.166578	1.83968	0.0658146	0.229871	26.625	19.529
ENSMUSG00000026111	Unc50	931.541	0.00643876	0.115048	0.0559658	0.955369	0.984077	19.545	17.589
ENSMUSG00000026110	Mgat4a	262.747	0.522564	0.266968	1.9574	0.0502999	0.192869	0.559	0.352
ENSMUSG00000026090	2010300C02Rik	223.845	-0.521403	0.740701	-0.703932	0.481475	0.719256	0.109	0.142
ENSMUSG00000060771	Tsga10	577.752	-0.0705788	0.331523	-0.212893	0.831411	0.92826	1.188	1.173
ENSMUSG00000097268	Gm26805	10.299	0.35862	0.782866	0.458086	0.646891	0.83108	0.323	0.224
ENSMUSG00000037216	Lipt1	121.569	0.159265	0.220477	0.722365	0.47007	0.710452	6.025	4.923
ENSMUSG00000026088	Mitd1	180.935	0.102561	0.200399	0.511782	0.608804	0.808931	2.527	2.11
ENSMUSG00000026087	Mrpl30	1285.77	-0.211406	0.161165	-1.31174	0.189609	0.436564	30.938	31.885
ENSMUSG00000058407	Txndc9	1856.33	0.0143993	0.189257	0.076083	0.939353	0.977094	30.681	27.595
ENSMUSG00000026083	Eif5b	2045.81	0.367087	0.170414	2.15409	0.0312328	0.141849	8.541	6.006
ENSMUSG00000026082	Rev1	2317.61	0.509312	0.273248	1.86392	0.0623336	0.221989	7.074	4.622
ENSMUSG00000102716	Gm5099	1.5741	-1.08368	1.56408	-0.692856	0.4884	NA	0.008	0.015
ENSMUSG00000037138	Aff3	380.978	-1.32718	0.36572	-3.62895	0.00028458	0.00468314	0.077	0.175
ENSMUSG00000085391	Gm16150	21.0205	0.57628	0.870192	0.662245	0.507814	0.739388	0.224	0.123
ENSMUSG00000087131	Gm16152	2.13942	-0.152942	2.8728	-0.053238	0.957542	NA	0.015	0.016
ENSMUSG00000048814	Lonrf2	1474.59	0.389806	0.319075	1.22167	0.221831	0.478016	8.691	6.162
ENSMUSG00000026080	Chst10	304.234	-0.188934	0.317537	-0.595001	0.551843	0.771721	1.629	1.734
ENSMUSG00000026078	Pdcl3	969.251	-0.0932078	0.133696	-0.697163	0.4857	0.722777	15.989	15.216
ENSMUSG00000026077	Npas2	55.9451	-0.353183	0.801729	-0.440527	0.659555	0.838578	0.023	0.026
ENSMUSG00000073702	Rpl31	6621.44	-0.403755	0.248987	-1.62159	0.104892	0.306918	285.096	333.455
ENSMUSG00000003134	Tbc1d8	7712.02	0.137592	0.275473	0.499474	0.617446	0.814058	14.277	11.938
ENSMUSG00000003135	Cnot11	828.603	-0.0251224	0.123005	-0.204238	0.838167	0.931393	13.781	12.633
ENSMUSG00000085894	Gm15832	24.2433	-0.478876	0.423571	-1.13057	0.258237	0.520275	0.972	1.211
ENSMUSG00000048234	Rnf149	766.95	-0.204897	0.162593	-1.26019	0.207602	0.459386	5.33	5.505
ENSMUSG00000050967	Creg2	245.726	0.570214	0.766091	0.744316	0.456685	0.700443	0.553	0.352
ENSMUSG00000097083	D930019O06Rik	9.22701	-0.0467035	1.08874	-0.0428967	0.965784	0.988271	0.068	0.064
ENSMUSG00000057173	Rfx8	3.73332	-0.0693748	1.00183	-0.0692481	0.944792	NA	0.015	0.014
ENSMUSG00000026074	Map4k4	3064.31	-0.37534	0.221647	-1.69341	0.0903771	0.281009	4.321	5.04
ENSMUSG00000026073	Il1r2	9.14505	1.57643	0.837219	1.88294	0.0597085	0.215448	0.044	0.013
ENSMUSG00000097899	Gm16894	3.73315	-0.162321	1.15997	-0.139935	0.888711	NA	0.051	0.051
ENSMUSG00000026072	Il1r1	100.469	0.575045	0.331755	1.73334	0.083035	0.267039	0.262	0.157
ENSMUSG00000070942	Il1rl2	18.5772	1.09875	0.658436	1.66872	0.0951726	0.289926	0.139	0.055
ENSMUSG00000026069	Il1rl1	3.89072	-0.841914	0.971219	-0.866863	0.386017	NA	0.022	0.034
ENSMUSG00000026070	Il18r1	6.13313	2.66391	1.10476	2.41129	0.0158963	0.089433	0.064	0.009
ENSMUSG00000026068	Il18rap	5.6497	1.42657	0.93722	1.52213	0.127976	0.346027	0.042	0.014
ENSMUSG00000026062	Slc9a2	23.7856	0.80741	0.831292	0.971271	0.331413	0.594772	0.088	0.046
ENSMUSG00000041945	Mfsd9	166.573	-0.157778	0.176473	-0.894066	0.371286	0.63019	1.98	1.999
ENSMUSG00000079588	Tmem182	4.74548	-1.19683	1.21029	-0.988879	0.322722	0.586326	0.009	0.02
ENSMUSG00000100832	Gm29260	1.88722	-2.98001	2.14707	-1.38794	0.165155	NA	0	0.002
ENSMUSG00000101299	Gm28175	9.24833	-2.41628	1.86104	-1.29835	0.194169	0.442895	0	0.004
ENSMUSG00000060424	Pantr1	94.0062	-2.11172	0.84339	-2.50384	0.0122853	0.0749555	0.056	0.226
ENSMUSG00000093436	Gm20646	15.6896	-1.31551	0.999422	-1.31627	0.188085	0.434534	0.026	0.06
ENSMUSG00000097063	Pantr2	2.84606	-0.0306307	1.35236	-0.0226498	0.98193	NA	0.064	0.061
ENSMUSG00000099784	Dalir	2.18022	0.448895	2.03232	0.220878	0.825188	NA	0.096	0.064
ENSMUSG00000060679	Mrps9	987.278	-0.307726	0.152501	-2.01786	0.0436061	0.175641	3.339	3.746
ENSMUSG00000041907	Gpr45	21.607	-1.24446	0.976213	-1.27479	0.202385	0.452694	0.009	0.02
ENSMUSG00000070939	Tgfbrap1	963.394	-0.0579396	0.114445	-0.506266	0.61267	0.811069	3.762	3.548
ENSMUSG00000041878	8430432A02Rik	16.2081	0.723865	0.567369	1.27583	0.202016	0.452358	2.715	1.537
ENSMUSG00000010290	AI597479	1469.23	-0.0978165	0.205456	-0.476094	0.634007	0.824816	17.697	17.481
ENSMUSG00000008136	Fhl2	125.01	-0.349912	0.694685	-0.503698	0.614474	0.812391	0.251	0.272
ENSMUSG00000094497	Gm8210	19.1208	-5.40554	1.55927	-3.4667	NA	NA	0.617	23.378
ENSMUSG00000066877	Nck2	1104.14	-0.373221	0.22293	-1.67416	0.0940986	0.28794	1.563	1.843
ENSMUSG00000026051	Ecrg4	316.147	-1.9498	1.41589	-1.37708	0.168487	0.409039	2.991	10.989
ENSMUSG00000100764	Gm29155	5.93475	0.373732	0.844646	0.442472	0.658148	0.837962	0.758	0.54
ENSMUSG00000100635	Gm29157	2.31353	-1.65704	1.4128	-1.17287	0.240847	NA	0.568	1.652
ENSMUSG00000100480	Gm29156	4.19959	0.0146885	1.00387	0.0146319	0.988326	0.996214	1.666	1.513
ENSMUSG00000057363	Uxs1	480.772	-0.240248	0.15903	-1.51071	0.130863	0.35069	1.117	1.201
ENSMUSG00000041763	Tpp2	2565.75	-0.0927632	0.144749	-0.640856	0.521616	0.751218	7.409	7.085
ENSMUSG00000047343	Mettl21c	3.88761	1.515	1.01093	1.49863	0.133971	NA	0.141	0.043
ENSMUSG00000091844	Gm8251	48.956	0.0968014	0.296958	0.325977	0.744442	0.885068	0.423	0.356
ENSMUSG00000026049	Tex30	578.675	-0.363537	0.320641	-1.13378	0.256886	0.51934	6.152	6.846
ENSMUSG00000101104	Gm29247	11.6365	-0.518214	0.585192	-0.885545	0.375863	0.634516	0.115	0.15
ENSMUSG00000026047	Poglut2	174.549	-0.227089	0.25415	-0.893525	0.371576	0.630351	2.732	2.826
ENSMUSG00000041684	Bivm	927.076	-0.0672874	0.127926	-0.525989	0.598896	0.802837	7.366	6.923
ENSMUSG00000026048	Ercc5	1058.65	-0.0575198	0.20186	-0.28495	0.775683	0.898953	6.225	5.92
ENSMUSG00000101567	Txn-ps1	9.41662	0.0486748	0.607389	0.0801376	0.936128	0.975653	7.097	6.168
ENSMUSG00000056870	Gulp1	184.799	-0.703188	0.43583	-1.61345	0.106648	0.310171	0.161	0.243
ENSMUSG00000026043	Col3a1	4605	-0.590477	0.741853	-0.795948	0.426062	0.677968	31.031	37.765
ENSMUSG00000026042	Col5a2	1033.02	-0.692955	0.618226	-1.12088	0.262341	0.525219	1.762	2.362
ENSMUSG00000025995	Wdr75	1476.62	0.156301	0.190895	0.818778	0.412913	0.666369	11.065	8.862
ENSMUSG00000084817	Gm5526	2.66674	-2.25068	1.31584	-1.71045	0.0871826	NA	0.505	2.151
ENSMUSG00000025993	Slc40a1	256.2	0.155211	0.407948	0.380467	0.703599	0.863768	3.129	2.582
ENSMUSG00000041144	Dnah7b	471.84	-0.807205	0.427669	-1.88745	0.0590996	0.214426	0.274	0.435
ENSMUSG00000101262	Gm8326	1.51411	0.649383	1.56044	0.416154	0.677297	NA	0.148	0.081
ENSMUSG00000101337	Dnah7c	31.2126	0.576062	0.627273	0.918359	0.358431	0.619479	0.024	0.015
ENSMUSG00000025986	Slc39a10	1954.43	-0.396008	0.226089	-1.75156	0.0798501	0.259822	4.137	4.902
ENSMUSG00000081185	Gm4852	1.72021	0.199498	1.66403	0.119888	0.904572	NA	0.552	0.468
ENSMUSG00000100033	Gm8337	5.37252	0.248582	0.987669	0.251685	0.801284	0.91214	0.634	0.506
ENSMUSG00000026109	Tmeff2	133.904	0.017735	0.687342	0.0258023	0.979415	0.993623	0.063	0.055
ENSMUSG00000101799	9330175M20Rik	2.52174	0.241453	1.29247	0.186815	0.851806	NA	0.004	0.003
ENSMUSG00000045954	Cavin2	295.24	-0.602725	0.414207	-1.45513	0.145634	0.374101	4.788	6.903
ENSMUSG00000026107	Nabp1	402.598	-0.10074	0.241526	-0.417098	0.676607	0.847498	6.769	6.653
ENSMUSG00000099413	Gm17767	7.10962	1.2134	0.851469	1.42507	0.154137	0.388031	0.016	0.007
ENSMUSG00000101741	Gm28055	35.047	2.17949	0.632768	3.44438	0.000572362	0.00794915	0.24	0.05
ENSMUSG00000018417	Myo1b	3246.75	0.953994	0.242607	3.93226	8.41524e-05	0.00177277	3.302	1.547
ENSMUSG00000072324	Gm8420	64.6012	0.26137	0.414614	0.630393	0.528437	0.756716	28.113	20.31
ENSMUSG00000062939	Stat4	34.5145	2.94117	0.850747	3.45716	0.000545904	0.00763086	0.104	0.013
ENSMUSG00000101628	Gm28177	20.6375	2.71406	0.73992	3.66805	0.000244409	0.00415967	0.093	0.013
ENSMUSG00000109599	Gm31812	70.616	0.698982	0.400629	1.74471	0.0810354	0.262435	3.052	1.745
ENSMUSG00000026104	Stat1	707.592	0.712429	0.367474	1.93872	0.0525357	0.198146	3.962	2.216
ENSMUSG00000026103	Gls	3149.47	0.368373	0.205788	1.79006	0.0734444	0.246364	10.093	7.087
ENSMUSG00000099648	Gm5975	1.54813	1.97949	1.65616	1.19523	0.231998	NA	0.397	0.094
ENSMUSG00000002881	Nab1	2089.56	-0.18247	0.297219	-0.613926	0.539264	0.763245	10.263	10.606
ENSMUSG00000100120	Gm553	2.45406	0.193851	1.28848	0.15045	0.88041	NA	0.011	0.009
ENSMUSG00000100007	Gm5527	143.926	-0.863846	0.237263	-3.64087	0.000271716	0.00453296	36.135	59.244
ENSMUSG00000043015	Nemp2	281.777	-0.751399	0.241521	-3.11111	0.00186384	0.0194	2.049	3.092
ENSMUSG00000103630	Gm37242	3.87213	1.32792	1.30117	1.02056	0.307463	NA	0.48	0.187
ENSMUSG00000041439	Mfsd6	639.924	1.06237	0.242393	4.38286	1.17133e-05	0.000375639	2.062	0.91
ENSMUSG00000026102	Inpp1	816.739	0.245777	0.233607	1.0521	0.292756	0.556976	5.593	4.332
ENSMUSG00000041426	Hibch	565.031	0.263612	0.172828	1.52528	0.127189	0.344655	1.73	1.301
ENSMUSG00000043629	1700019D03Rik	19.1283	1.31755	0.729198	1.80685	0.0707858	0.240631	0.039	0.014
ENSMUSG00000060715	1700019A02Rik	43.7083	0.231369	0.375898	0.61551	0.538218	0.762893	0.392	0.304
ENSMUSG00000026098	Pms1	1344.66	-0.183137	0.187838	-0.974977	0.329572	0.593333	2.507	2.605
ENSMUSG00000100679	Gm28778	12.3595	0.273121	0.648447	0.421192	0.673615	0.846083	0.153	0.111
ENSMUSG00000026096	Osgepl1	198.43	-0.119302	0.216985	-0.549815	0.582446	0.791526	3.054	2.98
ENSMUSG00000099913	Gm28551	4.26776	-0.541901	0.915417	-0.591972	0.553869	0.772994	0.028	0.038
ENSMUSG00000096141	Dnah7a	50.6544	-0.890212	0.378543	-2.35168	0.0186887	0.100083	0.026	0.044
ENSMUSG00000026094	Stk17b	877.283	-0.79458	0.218539	-3.63587	0.000277046	0.00457857	4.684	7.198
ENSMUSG00000042807	Hecw2	1576.91	-0.813998	0.325797	-2.49848	0.0124725	0.0756463	0.567	0.92
ENSMUSG00000025983	Ccdc150	83.3968	-0.364841	0.397834	-0.917069	0.359106	0.62007	0.122	0.139
ENSMUSG00000041303	Gtf3c3	2245.99	-0.00292843	0.185892	-0.0157534	0.987431	0.996108	11.453	10.456
ENSMUSG00000073678	Pgap1	1412.62	-0.241135	0.173475	-1.39003	0.16452	0.403547	3.414	3.679
ENSMUSG00000052331	Ankrd44	775.306	-1.14398	0.227568	-5.02698	4.98265e-07	2.89441e-05	0.383	0.783
ENSMUSG00000025982	Sf3b1	13512.2	-0.190009	0.190828	-0.995705	0.319393	0.583077	62.558	64.825
ENSMUSG00000103030	E330011M16Rik	5.53789	0.347399	0.772862	0.449496	0.653074	0.834383	0.662	0.477
ENSMUSG00000025981	Coq10b	905.449	1.39152	0.390906	3.55974	0.000371221	0.00564035	13.743	4.884
ENSMUSG00000025980	Hspd1	7197.55	0.161224	0.205399	0.784929	0.432495	0.682606	160.257	128.792
ENSMUSG00000073676	Hspe1	1163.93	0.291047	0.20139	1.44519	0.148404	0.37881	81.639	59.712
ENSMUSG00000089670	Gm16581	4.70818	-0.155248	0.827223	-0.187674	0.851132	0.937477	1.206	1.208
ENSMUSG00000025979	Mob4	2016.11	0.0743508	0.155002	0.479676	0.631458	0.823079	18.364	15.969
ENSMUSG00000025978	Rftn2	120.641	1.12744	0.513089	2.19735	0.0279953	0.131644	0.542	0.232
ENSMUSG00000097649	Gm10561	11.765	1.00171	0.775288	1.29205	0.196339	0.445644	0.31	0.144
ENSMUSG00000046994	Mars2	613.03	0.113669	0.160453	0.708422	0.478683	0.716842	11.287	9.242
ENSMUSG00000025977	Boll	60.1392	-2.00613	0.641157	-3.12893	0.00175446	0.0186214	0.056	0.214
ENSMUSG00000100215	Gm8292	25.3035	-0.414115	0.488633	-0.847497	0.396718	0.652023	12.248	14.129
ENSMUSG00000038349	Plcl1	2325.36	0.431277	0.392677	1.0983	0.272074	0.535319	1.768	1.209
ENSMUSG00000100309	Gm6644	7.11909	2.01351	0.843738	2.38642	0.0170135	0.0937376	2.118	0.478
ENSMUSG00000099950	9130227L01Rik	2.97603	-2.1438	1.82739	-1.17315	0.240736	NA	0.002	0.007
ENSMUSG00000038331	Satb2	92.2732	-0.845487	0.88545	-0.954867	0.339645	0.601807	0.026	0.042
ENSMUSG00000087022	9130024F11Rik	27.4962	-2.05762	1.54988	-1.32761	0.184308	0.429028	0.002	0.007
ENSMUSG00000101429	BC055402	3.24598	-2.62801	1.60992	-1.63239	0.102598	NA	0.01	0.056
ENSMUSG00000097519	4930558J18Rik	41.4064	-0.91808	0.392123	-2.34131	0.0192162	0.102072	0.352	0.587
ENSMUSG00000038323	1700066M21Rik	350.244	-0.472234	0.233074	-2.02612	0.0427529	0.173524	7.156	8.99
ENSMUSG00000048495	Tyw5	290.76	-0.112647	0.148226	-0.759968	0.447273	0.692403	3.051	2.978
ENSMUSG00000025971	Maip1	615.202	-0.141747	0.133876	-1.05879	0.289695	0.553542	10.097	10.068
ENSMUSG00000038305	Spats2l	243.888	-1.15837	0.435481	-2.65998	0.0078146	0.0545588	0.208	0.422
ENSMUSG00000091283	Gm17234	3.55191	-0.143567	1.2822	-0.111969	0.910848	NA	0.088	0.087
ENSMUSG00000054770	Kctd18	396.001	-0.0692856	0.163767	-0.423075	0.67224	0.845518	1.142	1.091
ENSMUSG00000026039	Sgo2a	1668.06	-1.13142	0.353844	-3.19752	0.00138614	0.0155997	7.576	14.66
ENSMUSG00000063558	Aox1	76.0143	0.582621	0.414487	1.40564	0.15983	0.396367	0.289	0.178
ENSMUSG00000064294	Aox3	64.8563	-0.188668	0.577802	-0.326527	0.744026	0.884853	0.203	0.217
ENSMUSG00000038242	Aox4	3.19575	-2.46421	2.41931	-1.01856	0.308412	NA	0	0.003
ENSMUSG00000079554	Aox2	6.69371	-1.66999	0.928056	-1.79945	0.0719471	0.243026	0.01	0.028
ENSMUSG00000103839	Gm37607	34.9639	-0.29251	0.402815	-0.726163	0.467739	0.708823	2.578	2.77
ENSMUSG00000051223	Bzw1	7161.61	-0.370575	0.0929936	-3.98495	6.74946e-05	0.00147969	93.876	109.518
ENSMUSG00000026034	Clk1	1809.59	-0.225153	0.180707	-1.24596	0.212781	0.466033	23.616	25.077
ENSMUSG00000026035	Ppil3	317.209	0.0206572	0.207341	0.0996292	0.920639	0.969434	4.921	4.406
ENSMUSG00000026036	Nif3l1	893.965	0.058863	0.195661	0.300842	0.763535	0.892487	5.262	4.526
ENSMUSG00000026037	Orc2	1138.5	0.0770371	0.1594	0.483295	0.628886	0.820921	5.188	4.386
ENSMUSG00000085054	Gm15834	98.0144	-0.120793	0.323217	-0.373721	0.708612	0.866348	0.988	0.968
ENSMUSG00000038174	Fam126b	3012.05	0.539531	0.356042	1.51536	0.129682	0.348585	11.194	7.11
ENSMUSG00000026032	Ndufb3	1297.57	0.210334	0.159887	1.31552	0.188336	0.434804	30.416	23.902
ENSMUSG00000059647	Cbx3-ps7	11.8492	0.147425	0.692952	0.212749	0.831523	0.928285	4.81	3.985
ENSMUSG00000047528	Flacc1	3.09113	-0.411766	1.14124	-0.360807	0.718244	NA	0.011	0.014
ENSMUSG00000102059	Gm20257	11.4023	0.598484	0.649565	0.921361	0.356862	0.617908	0.558	0.328
ENSMUSG00000026031	Cflar	1674.82	0.394388	0.249266	1.5822	0.113604	0.322195	9.331	6.585
ENSMUSG00000026029	Casp8	104.869	-0.119519	0.273002	-0.437793	0.661536	0.839662	0.422	0.409
ENSMUSG00000099719	Gm28802	7.39972	-0.378934	0.831409	-0.455774	0.648553	0.831908	0.029	0.035
ENSMUSG00000026028	Trak2	12466.2	-0.798988	0.218643	-3.65431	0.000257873	0.00433558	24.327	37.893
ENSMUSG00000026027	Stradb	567.617	-0.155653	0.176429	-0.882241	0.377647	0.635685	5.285	5.386
ENSMUSG00000072295	C2cd6	40.5577	0.459529	0.422543	1.08753	0.276802	0.540402	0.106	0.072
ENSMUSG00000038079	Tmem237	2621.73	-0.317911	0.126618	-2.5108	0.0120458	0.0739834	23.131	25.98
ENSMUSG00000097573	G730003C15Rik	95.5116	-0.809713	0.274127	-2.95378	0.00313905	0.0284863	5.947	9.52
ENSMUSG00000079550	Mpp4	10468.4	1.3518	0.311447	4.34037	1.42242e-05	0.000435112	74.489	27.095
ENSMUSG00000101586	Gm29017	22.7657	0.950804	0.459416	2.06959	0.0384906	0.162347	0.355	0.169
ENSMUSG00000026024	Als2	2759.92	-0.124252	0.129996	-0.955811	0.339168	0.601652	7.511	7.404
ENSMUSG00000026023	Cdk15	4.66038	-0.743844	1.53573	-0.484359	0.628131	0.820563	0.005	0.007
ENSMUSG00000041075	Fzd7	270.958	-0.21284	0.25122	-0.847225	0.39687	0.652162	15.495	16.29
ENSMUSG00000047361	Gm973	120.674	1.01884	0.577431	1.76444	0.0776586	0.255335	0.322	0.149
ENSMUSG00000026021	Sumo1	2246.43	-0.0836032	0.160735	-0.520131	0.602972	0.805672	5.325	5.148
ENSMUSG00000101400	Gm29596	1.87751	0.771745	1.76268	0.437824	0.661514	NA	0.879	0.481
ENSMUSG00000026020	Nop58	4359.66	-0.168762	0.205835	-0.819893	0.412277	0.66585	24.984	25.309
ENSMUSG00000067336	Bmpr2	5292	0.489132	0.217804	2.24575	0.02472	0.120714	11.915	7.797
ENSMUSG00000041040	Fam117b	2539.91	-0.0303459	0.215821	-0.140607	0.888181	0.953546	7.408	6.961
ENSMUSG00000026018	Ica1l	321.894	0.376439	0.378657	0.994143	0.320153	0.583579	1.082	0.761
ENSMUSG00000026019	Wdr12	1023.85	0.145254	0.187273	0.775623	0.437971	0.686665	8.135	6.662
ENSMUSG00000026017	Carf	1093.98	-0.173333	0.17014	-1.01877	0.308314	0.572981	4.021	4.104
ENSMUSG00000073664	Nbeal1	2160.75	0.108818	0.192898	0.564121	0.572672	0.785173	3.188	2.721
ENSMUSG00000049439	Cyp20a1	616.556	-0.202182	0.147528	-1.37047	0.17054	0.411775	2.769	2.877
ENSMUSG00000026782	Abi2	4036.69	-0.310725	0.126363	-2.45898	0.0139334	0.0818653	10.319	11.55
ENSMUSG00000026014	Raph1	935.633	-0.375516	0.261508	-1.43596	0.151013	0.38335	2.099	2.49
ENSMUSG00000082160	Gm11578	9.98119	-0.231016	0.782025	-0.295408	0.767682	0.894462	3.297	3.59
ENSMUSG00000101188	Eif4a-ps4	2636.96	0.0457711	0.331159	0.138215	0.890071	0.954571	475.762	398.982
ENSMUSG00000026012	Cd28	7.20975	0.282651	0.908262	0.311199	0.755649	0.888713	0.028	0.021
ENSMUSG00000026011	Ctla4	3.6627	-0.743618	1.73427	-0.428778	0.668085	NA	0.008	0.011
ENSMUSG00000026009	Icos	3.17903	0.967759	1.45099	0.666966	0.504794	NA	0.018	0.009
ENSMUSG00000100893	Gm28083	2.95939	0.971196	1.23123	0.788804	0.430226	NA	0.131	0.063
ENSMUSG00000085248	Gm11587	29.0184	1.81193	0.509128	3.55889	0.000372423	0.00565396	1.652	0.416
ENSMUSG00000085447	9530026F06Rik	1.9663	1.19881	1.41672	0.846183	0.397451	NA	0.044	0.018
ENSMUSG00000052062	Pard3b	749.706	0.941345	0.337941	2.78553	0.005344	0.041507	0.206	0.099
ENSMUSG00000085400	Pard3bos3	1.12024	1.21892	1.69071	0.720951	0.47094	NA	0.008	0.003
ENSMUSG00000025969	Nrp2	4130.87	-0.946745	0.359703	-2.63201	0.00848801	0.0578224	6.005	10.528
ENSMUSG00000100811	Gm29083	1.61038	1.22768	1.62396	0.755975	0.449664	NA	0.149	0.057
ENSMUSG00000100426	Gm4208	4.0826	-3.43679	1.23957	-2.77257	0.00556161	NA	0.019	0.191
ENSMUSG00000040865	Ino80d	1486.79	-0.0489725	0.151618	-0.323	0.746695	0.885915	1.966	1.858
ENSMUSG00000084799	Ino80dos	318.05	0.0263694	0.196181	0.134414	0.893076	0.955741	1.544	1.387
ENSMUSG00000025968	Ndufs1	3784.06	0.331729	0.17926	1.85055	0.0642346	0.226349	26.442	18.976
ENSMUSG00000025967	Eef1b2	5477.61	-0.271512	0.328147	-0.827409	0.408005	0.662104	276.056	292.102
ENSMUSG00000046856	Gpr1	1.33853	0.841287	2.05281	0.409823	0.681936	NA	0.005	0.002
ENSMUSG00000027520	Zdbf2	273.516	0.464642	0.892069	0.520859	0.602465	0.805451	1.825	1.063
ENSMUSG00000081643	Gm11605	16.7139	-0.148712	0.50032	-0.297234	0.766288	0.893481	5.766	5.795
ENSMUSG00000025964	Adam23	187.009	1.12863	0.866233	1.30292	0.192601	0.441186	0.129	0.049
ENSMUSG00000069085	Dytn	2.7255	1.50097	1.38714	1.08206	0.279227	NA	0.01	0.003
ENSMUSG00000025963	Mdh1b	86.2333	0.952588	0.426494	2.23353	0.0255138	0.123354	0.821	0.392
ENSMUSG00000025962	Fastkd2	590.26	-0.118097	0.168391	-0.701328	0.483098	0.720341	4.638	4.531
ENSMUSG00000044689	Gm13749	2.88324	1.79456	1.30504	1.37509	0.169102	NA	0.237	0.059
ENSMUSG00000025959	Klf7	818.724	-0.453088	0.142056	-3.18951	0.00142515	0.0159096	1.679	2.065
ENSMUSG00000086836	Gm13748	14.1778	-0.958604	0.713545	-1.34344	0.17913	0.422911	0.189	0.338
ENSMUSG00000101895	Gm28981	9.72263	0.543905	0.854009	0.636885	0.5242	0.753216	0.022	0.013
ENSMUSG00000025958	Creb1	4761.26	-0.0275558	0.17358	-0.15875	0.873866	0.948153	14.884	13.93
ENSMUSG00000025956	Mettl21a	451.761	0.180972	0.246983	0.73273	0.463723	0.705604	8.901	7.249
ENSMUSG00000101832	Gm28982	25.5659	0.494603	0.523406	0.944971	0.344674	0.606563	0.612	0.408
ENSMUSG00000087213	2810408I11Rik	90.2994	-0.975231	0.355993	-2.73947	0.00615391	0.0461888	1.172	2.078
ENSMUSG00000070871	Ccnyl1	515.385	-0.342117	0.163255	-2.0956	0.0361176	0.155931	2.559	2.9
ENSMUSG00000045005	Fzd5	177.207	-0.251693	0.271208	-0.928047	0.353383	0.614478	5.017	5.276
ENSMUSG00000102140	Gm38058	3.74205	-2.14423	1.18207	-1.81396	0.0696843	NA	0.067	0.251
ENSMUSG00000051344	Plekhm3	1132.92	0.207527	0.210597	0.985422	0.324417	0.588146	1.499	1.197
ENSMUSG00000084416	Rpl10a-ps1	663.197	-0.293102	0.277874	-1.0548	0.291515	0.555269	209.15	226.793
ENSMUSG00000100774	Gm7329	1.68827	-2.74476	1.97249	-1.39152	0.164069	NA	0.728	3.951
ENSMUSG00000044816	D630023F18Rik	2.02667	-0.805023	2.22455	-0.361882	0.71744	NA	0.004	0.007
ENSMUSG00000025950	Idh1	2372.62	-0.0880221	0.159942	-0.550337	0.582088	0.791205	19.577	18.874
ENSMUSG00000025949	Pikfyve	2240.82	0.173092	0.152828	1.13259	0.257387	0.519605	5.284	4.258
ENSMUSG00000025946	Pth2r	6.59827	-0.194151	0.750839	-0.258579	0.79596	0.909441	0.01	0.011
ENSMUSG00000015222	Map2	37887.1	0.362903	0.217453	1.66888	0.0951414	0.289876	35.755	25.433
ENSMUSG00000073656	Gm10558	27.0756	3.36469	1.03891	3.23867	0.00120087	0.0139267	2.068	0.175
ENSMUSG00000055567	Unc80	7075.84	0.644513	0.259315	2.48544	0.0129391	0.0778189	8.242	4.854
ENSMUSG00000026005	Rpe	852.802	0.160667	0.188579	0.851988	0.394221	0.649514	9.916	7.931
ENSMUSG00000026004	Kansl1l	2793.45	-0.190779	0.268901	-0.709477	0.478029	0.716318	5.992	6.337
ENSMUSG00000102776	Gm38162	7.7569	0.138095	0.779016	0.177269	0.859297	0.941116	0.371	0.314
ENSMUSG00000082057	Gm15789	2.62417	0.997863	1.24155	0.803721	0.421558	NA	0.218	0.099
ENSMUSG00000103553	Gm38218	4.80949	-0.00751052	0.909913	-0.0082541	0.993414	0.998664	0.285	0.256
ENSMUSG00000026003	Acadl	637.343	1.37567	0.319065	4.31157	1.62101e-05	0.000478704	7.63	2.678
ENSMUSG00000061816	Myl1	2.90346	-0.868239	1.29735	-0.669238	0.503344	NA	0.024	0.037
ENSMUSG00000026000	Lancl1	1421.87	0.23491	0.153558	1.52978	0.126071	0.343118	8.36	6.346
ENSMUSG00000025991	Cps1	2.20145	1.8043	2.01625	0.89488	0.370851	NA	0.008	0.002
ENSMUSG00000062209	Erbb4	3770.9	-0.39175	0.598537	-0.654513	0.512781	0.743571	0.889	1.119
ENSMUSG00000100354	Gm29113	1.66933	-0.829051	1.55899	-0.531786	0.594874	NA	0.098	0.171
ENSMUSG00000101156	Gm29114	1.16366	-0.958719	1.72802	-0.554807	0.579027	NA	0.006	0.011
ENSMUSG00000025997	Ikzf2	1133.55	0.0522816	0.258878	0.201955	0.839952	0.931976	1.708	1.525
ENSMUSG00000053153	Spag16	82.8584	-0.973888	0.785766	-1.23941	0.215193	0.46912	0.013	0.024
ENSMUSG00000045648	Vwc2l	28.8116	0.857552	1.22027	0.702755	0.482208	0.719792	0.004	0.002
ENSMUSG00000026196	Bard1	759.301	-1.26149	0.289154	-4.36267	1.28482e-05	0.00040402	1.276	2.714
ENSMUSG00000050296	Abca12	1.68042	-1.90559	1.82181	-1.04599	0.295566	NA	0.001	0.003
ENSMUSG00000026192	Atic	1371.83	-0.0455659	0.254489	-0.179048	0.8579	0.940766	12.495	11.525
ENSMUSG00000026193	Fn1	3909.26	0.709794	0.597182	1.18857	0.234608	0.494525	18.219	9.136
ENSMUSG00000073652	Apol7d	1.39846	-1.00348	1.52795	-0.65675	0.511342	NA	0.021	0.038
ENSMUSG00000101834	Gm5829	2.70834	1.41794	1.67347	0.847309	0.396823	NA	1.6	0.546
ENSMUSG00000101211	Gm28818	1.1414	-2.26435	2.06629	-1.09585	0.273143	NA	0.003	0.014
ENSMUSG00000101848	4933417E11Rik	2.79865	-3.31898	2.02004	-1.64302	0.100378	NA	0.002	0.015
ENSMUSG00000101496	Gm8885	51.5056	-0.279077	0.419946	-0.664555	0.506335	0.73875	19.419	20.435
ENSMUSG00000102123	Gm4319	1.55	-0.00367485	1.78894	-0.00205421	0.998361	NA	0.014	0.013
ENSMUSG00000039395	Mreg	984.568	1.54465	0.516261	2.992	0.00277156	0.0258777	4.955	1.606
ENSMUSG00000094655	Gm25360	2730.63	-0.836051	0.625218	-1.33722	0.181152	0.425172	1929.6	3284.28
ENSMUSG00000094050	Gm23472	931.16	-0.95144	0.594952	-1.59919	0.109779	0.315906	888.13	1671.4
ENSMUSG00000093956	Gm24497	498.986	-0.541611	0.353862	-1.53057	0.125876	0.342842	494.148	676.94
ENSMUSG00000093843	Gm25939	1797.49	1.22355	0.478856	2.55515	0.0106142	0.0674658	3039.59	1171.69
ENSMUSG00000026189	Pecr	131.781	0.381812	0.354474	1.07712	0.281426	0.544878	1.254	0.879
ENSMUSG00000026188	Tmem169	76.2986	0.29715	0.296739	1.00139	0.31664	0.581051	0.479	0.354
ENSMUSG00000026187	Xrcc5	1461.83	0.403382	0.276693	1.45787	0.144877	0.372996	4.101	2.848
ENSMUSG00000039372	Marchf4	78.0875	2.07282	0.541957	3.82469	0.000130935	0.00255228	0.237	0.051
ENSMUSG00000039354	Smarcal1	1868.38	0.46262	0.203643	2.27172	0.0231032	0.115647	9.964	6.645
ENSMUSG00000110712	Gm39662	9.15562	0.52162	1.11098	0.469513	0.638703	0.828073	1.493	1.006
ENSMUSG00000046330	Rpl37a	7367.31	-0.413494	0.234623	-1.76238	0.0780052	0.255676	514.32	607.749
ENSMUSG00000039323	Igfbp2	1670.1	-1.84427	0.415043	-4.44357	8.84789e-06	0.000303298	6.766	22.696
ENSMUSG00000026185	Igfbp5	1755.28	0.846451	0.385107	2.19796	0.027952	0.131536	38.275	19.064
ENSMUSG00000101968	1700027A15Rik	1.31219	2.63501	1.79161	1.47075	0.141358	NA	0.012	0.002
ENSMUSG00000099877	Pinc	2.05286	1.7957	1.96083	0.915788	0.359778	NA	0.046	0.012
ENSMUSG00000100301	6030407O03Rik	25.4005	-0.359405	0.675995	-0.531668	0.594956	0.800372	0.023	0.025
ENSMUSG00000055322	Tns1	394.462	0.412693	0.24998	1.6509	0.0987584	0.29629	0.508	0.34
ENSMUSG00000061815	Rufy4	1.58576	1.01188	1.73379	0.583625	0.559472	NA	0.019	0.008
ENSMUSG00000026180	Cxcr2	2.73251	3.33503	1.60154	2.08239	0.0373068	NA	0.192	0.017
ENSMUSG00000006304	Arpc2	2243.64	0.074624	0.144666	0.515838	0.605968	0.807114	14.371	12.241
ENSMUSG00000064272	Gpbar1	2.23045	0.459253	1.67114	0.274814	0.783459	NA	0.395	0.257
ENSMUSG00000006299	Aamp	3496.82	-0.057789	0.14494	-0.398709	0.690108	0.855476	154.394	145.613
ENSMUSG00000026179	Pnkd	580.889	0.14077	0.14655	0.960557	0.336775	0.59891	1.682	1.379
ENSMUSG00000006301	Tmbim1	277.475	0.652047	0.269259	2.42163	0.015451	0.0878283	3.568	2.056
ENSMUSG00000073650	Catip	21.5714	0.00636663	0.893474	0.0071257	0.994315	0.999	0.704	0.651
ENSMUSG00000026177	Slc11a1	179.337	-0.527968	0.304864	-1.73181	0.0833069	0.267514	2.89	3.664
ENSMUSG00000026176	Ctdsp1	340.52	-0.137502	0.146336	-0.939629	0.347408	0.609207	12.24	12.194
ENSMUSG00000026175	Vil1	7.02326	-1.0061	0.918504	-1.09537	0.273354	0.53689	0.027	0.049
ENSMUSG00000033364	Usp37	3364.12	-0.337129	0.194824	-1.73043	0.0835528	0.267947	5.91	6.733
ENSMUSG00000026174	Cnot9	1763.42	-0.548526	0.209935	-2.61284	0.00897922	0.0601156	11.974	15.567
ENSMUSG00000026173	Plcd4	54.0088	0.804026	0.612066	1.31363	0.188972	0.435753	0.339	0.18
ENSMUSG00000026135	Zfp142	483.992	0.0779656	0.149646	0.521001	0.602366	0.805451	4.511	3.884
ENSMUSG00000026172	Bcs1l	358.551	0.464426	0.214374	2.16642	0.0302788	0.138849	19.904	12.823
ENSMUSG00000026171	Rnf25	560.515	-0.118256	0.148907	-0.794156	0.427104	0.678827	13.384	13.233
ENSMUSG00000033276	Stk36	208.624	-0.291557	0.238685	-1.22151	0.221891	0.478016	1.177	1.323
ENSMUSG00000033257	Ttll4	1534.53	-0.260289	0.14644	-1.77745	0.0754949	0.25057	6.888	7.325
ENSMUSG00000026170	Cyp27a1	26.8584	1.06879	0.434623	2.45913	0.0139274	0.0818598	0.304	0.135
ENSMUSG00000033227	Wnt6	7.25962	-0.0687919	0.708343	-0.0971166	0.922634	0.9701	0.157	0.149
ENSMUSG00000026167	Wnt10a	102.438	-0.371003	0.795996	-0.466087	0.641154	0.829034	1.507	1.85
ENSMUSG00000089964	Gm16582	54.1249	0.985281	0.763659	1.29021	0.196978	0.446617	0.329	0.151
ENSMUSG00000006546	Cryba2	7.67455	1.95828	1.63254	1.19953	0.230323	0.488545	0.182	0.039
ENSMUSG00000047021	Cfap65	46.9141	-0.76663	0.76187	-1.00625	0.314297	0.579168	0.271	0.43
ENSMUSG00000006538	Ihh	4.74505	-0.629079	0.83453	-0.753812	0.450962	0.695957	0.135	0.185
ENSMUSG00000026162	Nhej1	66.6971	-0.321103	0.289957	-1.10742	0.268114	0.531149	0.087	0.099
ENSMUSG00000026205	Slc23a3	3.67648	-2.04778	1.27412	-1.60721	0.108009	NA	0.024	0.095
ENSMUSG00000033159	Cnppd1	908.226	-0.278142	0.170061	-1.63554	0.101936	0.301846	20.606	22.712
ENSMUSG00000049339	Retreg2	2627.71	0.291474	0.150087	1.94204	0.0521328	0.19717	115.647	86.2
ENSMUSG00000026197	Zfand2b	138.922	-0.246515	0.219065	-1.1253	0.26046	0.522968	9.201	9.948
ENSMUSG00000033124	Atg9a	665.687	0.298936	0.188882	1.58266	0.113498	0.322053	13.326	9.802
ENSMUSG00000026199	Ankzf1	404.855	-0.451088	0.166031	-2.71688	0.00658996	0.0486524	9.836	12.132
ENSMUSG00000026200	Glb1l	230.922	-0.313805	0.190533	-1.64698	0.0995614	0.297641	3.506	3.982
ENSMUSG00000026201	Stk16	633.808	0.172481	0.194369	0.887389	0.374869	0.633507	29.209	23.167
ENSMUSG00000026202	Tuba4a	643.902	3.14874	0.633472	4.97061	6.67441e-07	3.61723e-05	27.595	2.86
ENSMUSG00000096094	A630095N17Rik	1.15414	-2.04957	2.3487	-0.87264	0.382859	NA	0.006	0.023
ENSMUSG00000026203	Dnajb2	372.471	2.68789	0.39445	6.81426	9.475e-12	2.38746e-09	14.334	2.082
ENSMUSG00000026204	Ptprn	834.602	2.45212	0.328777	7.4583	8.76464e-14	4.72365e-11	9.749	1.588
ENSMUSG00000033061	Resp18	45.1123	0.973741	1.20984	0.804851	0.420906	0.673352	0.157	0.065
ENSMUSG00000026209	Dnpep	1727.14	-0.159801	0.169962	-0.940219	0.347105	0.608909	34.471	34.571
ENSMUSG00000026208	Des	28.2109	0.138291	0.490024	0.282213	0.77778	0.900441	0.691	0.558
ENSMUSG00000085653	Gm15179	2.39704	3.14125	1.46383	2.14592	0.0318795	NA	0.184	0.019
ENSMUSG00000026207	Speg	1507.52	1.01551	0.301201	3.37153	0.000747524	0.00970781	7.472	3.236
ENSMUSG00000033021	Gmppa	471.648	0.325728	0.235063	1.3857	0.165838	0.405288	16.306	11.568
ENSMUSG00000033007	Asic4	712.314	2.77598	0.568231	4.88531	1.03268e-06	5.19069e-05	8.769	1.116
ENSMUSG00000032997	Chpf	885.872	0.826902	0.153946	5.37138	7.81374e-08	6.29055e-06	44.978	22.685
ENSMUSG00000026211	Obsl1	658.583	-0.223364	0.269173	-0.829817	0.406642	0.660943	4.797	4.975
ENSMUSG00000051703	Tmem198	236.324	0.540207	0.223302	2.41917	0.0155559	0.0881727	7.562	4.62
ENSMUSG00000032968	Inha	73.2194	0.0704175	0.411658	0.171058	0.864178	0.943653	3.668	3.14
ENSMUSG00000082745	Gm15181	2.07181	-1.46159	1.70712	-0.85617	0.391904	NA	1.481	4.02
ENSMUSG00000026213	Stk11ip	582.043	-0.0454315	0.177799	-0.255522	0.79832	0.910528	7.102	6.538
ENSMUSG00000006576	Slc4a3	437.879	0.987217	0.258934	3.81262	0.000137502	0.00266249	4.444	1.994
ENSMUSG00000026235	Epha4	426.543	-0.144845	0.72989	-0.198447	0.842695	0.933005	0.333	0.344
ENSMUSG00000102052	Gm28387	2.67374	-0.454085	1.186	-0.382872	0.701815	NA	0.023	0.03
ENSMUSG00000004872	Pax3	560.783	-1.47419	0.465616	-3.16611	0.00154493	0.0168914	0.938	2.464
ENSMUSG00000118426	Gm2102	1.58458	2.43349	2.04126	1.19215	0.233203	NA	0.565	0.089
ENSMUSG00000032908	Sgpp2	1400.79	0.994163	0.175084	5.67821	1.36109e-08	1.42745e-06	3.284	1.504
ENSMUSG00000099561	Gm28410	1.07564	1.42646	2.05272	0.694911	0.487111	NA	0.024	0.008
ENSMUSG00000026245	Farsb	2021.53	0.0764934	0.161331	0.47414	0.6354	0.825335	6.471	5.525
ENSMUSG00000090486	BC035947	5.43114	5.74002	1.50806	3.80622	0.000141105	0.002716	0.149	0
ENSMUSG00000012187	Mogat1	443.629	3.99336	0.689436	5.79221	6.94682e-09	8.07079e-07	7.379	0.424
ENSMUSG00000032883	Acsl3	2295.1	-0.359783	0.220513	-1.63157	0.10277	0.30307	8.167	9.355
ENSMUSG00000099377	Gm6159	6.13442	0.342989	0.809744	0.423577	0.671875	0.845337	0.903	0.645
ENSMUSG00000099706	Gm29536	22.1957	-1.72744	0.555043	-3.11226	0.00185661	0.0193563	0.006	0.018
ENSMUSG00000047330	Kcne4	32.5684	-0.437818	0.775998	-0.564201	0.572618	0.785168	2.566	2.973
ENSMUSG00000050711	Scg2	2197.97	0.449771	0.659013	0.682492	0.494928	0.730045	110.095	74.604
ENSMUSG00000054702	Ap1s3	11.955	-0.125175	0.70276	-0.178119	0.85863	0.941011	0.028	0.026
ENSMUSG00000073643	Wdfy1	1727.62	-1.48307	0.622329	-2.3831	NA	NA	2.601	6.972
ENSMUSG00000026248	Mrpl44	574.795	0.123928	0.146029	0.848652	0.396075	0.651362	22.041	18.253
ENSMUSG00000026249	Serpine2	1355.48	0.360798	0.253255	1.42464	0.15426	0.388242	4.962	3.472
ENSMUSG00000067106	Gm5529	7.2027	0.166015	0.734501	0.226024	0.821183	0.923789	1.574	1.27
ENSMUSG00000100397	Gm28071	6.70237	-0.209054	0.898041	-0.232788	0.815926	0.920963	2.346	2.509
ENSMUSG00000043230	Fam124b	3.04382	-1.05012	1.33555	-0.78628	0.431703	NA	0.014	0.026
ENSMUSG00000103404	Gm37932	1.79757	-0.200825	1.88552	-0.106509	0.915178	NA	0.19	0.185
ENSMUSG00000004364	Cul3	7163.77	0.328278	0.145811	2.2514	0.02436	0.11982	22.144	16.045
ENSMUSG00000101722	Gm29125	20.4373	2.92382	0.689212	4.24226	2.21279e-05	0.000612449	2.937	0.363
ENSMUSG00000090637	Gm6189	2.51491	3.04247	1.69986	1.78984	0.0734802	NA	0.301	0.032
ENSMUSG00000101483	1700016L21Rik	28.8852	2.84766	0.677332	4.20423	2.61972e-05	0.000701074	0.343	0.04
ENSMUSG00000038608	Dock10	443.621	-0.4	0.244587	-1.63541	0.101964	0.301846	0.347	0.407
ENSMUSG00000054976	Nyap2	966.82	2.01088	0.557842	3.60474	0.000312467	0.00498988	1.242	0.287
ENSMUSG00000087008	Gm5530	2.71863	0.60036	1.21095	0.495778	0.620051	NA	0.564	0.346
ENSMUSG00000055980	Irs1	31206.7	-0.232281	0.318654	-0.728942	0.466037	0.707192	122.287	131.687
ENSMUSG00000022591	Gm9747	12.0383	-1.29655	0.704456	-1.8405	0.0656952	0.229647	0.712	1.644
ENSMUSG00000026142	Rhbdd1	675.979	0.111024	0.200832	0.552817	0.580389	0.79023	1.166	0.972
ENSMUSG00000100786	Gm28940	4.64879	2.42534	1.80965	1.34022	0.180173	0.424033	0.042	0.006
ENSMUSG00000067158	Col4a4	19.5123	-1.03152	0.633877	-1.62733	0.103668	0.304799	0.021	0.041
ENSMUSG00000079465	Col4a3	32.6237	-2.05796	0.714362	-2.88084	0.00396615	0.0340041	0.025	0.095
ENSMUSG00000097564	C430014B12Rik	11.0641	0.119086	0.565265	0.210673	0.833142	0.928945	0.068	0.056
ENSMUSG00000026150	Mff	2429.54	0.20625	0.18314	1.12619	0.260086	0.52251	19.051	15.158
ENSMUSG00000026159	Agfg1	2112.36	-0.0697152	0.124405	-0.56039	0.575213	0.786591	6.778	6.47
ENSMUSG00000101784	Gm7553	2.12973	0.964829	1.51789	0.63564	0.525011	NA	0.308	0.134
ENSMUSG00000038496	Slc19a3	14.8939	0.672425	0.667453	1.00745	0.313719	0.578921	0.122	0.069
ENSMUSG00000053161	Daw1	9.88734	-1.08242	1.43233	-0.755705	0.449826	0.694756	0.031	0.061
ENSMUSG00000026163	Sphkap	14250.7	1.65111	0.412083	4.00673	6.15652e-05	0.00138091	34.396	10.075
ENSMUSG00000100580	4933436I20Rik	5.89683	1.38583	1.12389	1.23306	0.217552	0.471982	0.006	0.002
ENSMUSG00000045658	Pid1	494.952	0.110048	0.311993	0.352727	0.724293	0.873883	0.403	0.332
ENSMUSG00000036766	Dner	356.549	0.771868	0.498925	1.54706	0.121848	0.335835	0.21	0.102
ENSMUSG00000026219	Trip12	10067.6	0.12558	0.150454	0.834673	0.403902	0.658751	19.553	16.243
ENSMUSG00000073633	Fbxo36	252.189	0.0476583	0.217026	0.219597	0.826185	0.925401	0.951	0.83
ENSMUSG00000026220	Slc16a14	22.5636	-2.5758	0.560408	-4.59629	4.30077e-06	0.000171694	0.038	0.208
ENSMUSG00000118590	AC167036.1	1.86081	0.976761	1.3757	0.710011	0.477698	NA	0.101	0.046
ENSMUSG00000052477	C130026I21Rik	16.595	0.747412	0.587303	1.27262	0.203154	0.453752	0.012	0.006
ENSMUSG00000064281	Rpl19-ps1	5.63283	-0.096874	0.965259	-0.100361	0.920058	0.969266	1.868	1.681
ENSMUSG00000072109	A530040E14Rik	7.40713	3.17049	1.46044	2.17092	0.0299376	0.137772	0.086	0.008
ENSMUSG00000089716	Gm6264	4.40307	1.72759	1.46643	1.17809	0.238759	0.499773	0.014	0.004
ENSMUSG00000079455	Gm16026	8.80838	0.96689	1.00548	0.961616	0.336243	0.598652	0.045	0.02
ENSMUSG00000091199	Gm2619	1.27122	2.3575	2.69463	0.874889	0.381634	NA	0.012	0
ENSMUSG00000070034	Sp110	53.7395	1.20566	0.504949	2.38769	0.0169547	0.0935062	0.573	0.219
ENSMUSG00000070031	Sp140	41.5128	1.04017	0.484757	2.14575	0.0318931	0.143948	0.259	0.11
ENSMUSG00000073628	Gm10552	1.69056	0.825168	2.00288	0.411991	0.680346	NA	0.018	0.009
ENSMUSG00000026222	Sp100	72.4664	1.45988	0.454894	3.20928	0.00133069	0.015116	0.37	0.118
ENSMUSG00000052760	A630001G21Rik	23.1415	0.196889	0.383693	0.513143	0.607852	0.808441	0.09	0.071
ENSMUSG00000036707	Cab39	4402.98	0.0251458	0.165283	0.152138	0.879078	0.950241	15.517	13.962
ENSMUSG00000026223	Itm2c	2694.7	0.212334	0.314309	0.675558	0.499322	0.732928	37.299	29.037
ENSMUSG00000026224	4933407L21Rik	11.5477	-0.819299	0.828838	-0.988491	0.322912	0.586514	0.168	0.265
ENSMUSG00000049608	Gpr55	2.93439	1.74494	1.43041	1.21989	0.222508	NA	0.032	0.008
ENSMUSG00000099342	Gm18180	22.9772	0.150656	0.401106	0.375602	0.707213	0.865532	3.284	2.712
ENSMUSG00000026226	Spata3	1.14278	0.278845	2.03954	0.13672	0.891252	NA	0.021	0.016
ENSMUSG00000026227	2810459M11Rik	68.4197	0.518588	0.721218	0.719044	0.472114	0.711646	1.262	0.825
ENSMUSG00000026229	Psmd1	4388.57	0.0775282	0.143368	0.540765	0.58867	0.796437	12.916	11.038
ENSMUSG00000026228	Htr2b	19.1497	0.561689	0.457386	1.22804	0.219431	0.474468	0.47	0.289
ENSMUSG00000094638	Gm21972	109.326	0.283399	0.216746	1.30751	0.191039	0.438747	0.868	0.643
ENSMUSG00000062590	Armc9	829.616	0.0858566	0.185366	0.463174	0.643239	0.829387	1.422	1.218
ENSMUSG00000087538	Gm16341	2.99811	-1.11911	1.24754	-0.89705	0.369692	NA	0.013	0.027
ENSMUSG00000079445	B3gnt7	7.59954	-0.44661	0.832984	-0.536157	0.59185	0.798656	0.176	0.212
ENSMUSG00000026234	Ncl	9652.21	-0.168407	0.223334	-0.754058	0.450814	0.69585	142.326	143.449
ENSMUSG00000073627	C130036L24Rik	91.2499	-0.484578	0.281752	-1.71988	0.0854549	0.271013	1.053	1.306
ENSMUSG00000026237	Nmur1	2.15593	-0.697561	1.37509	-0.507286	0.611954	NA	0.008	0.013
ENSMUSG00000026238	Ptma	25328.7	-1.07445	0.284197	-3.78066	0.00015641	0.00293773	885.167	1676.65
ENSMUSG00000026239	Pde6d	920.979	0.638582	0.23026	2.77331	0.00554887	0.0427728	6.153	3.605
ENSMUSG00000026240	Cops7b	379.136	-0.213186	0.200644	-1.0625	0.288007	0.551511	2.494	2.579
ENSMUSG00000103609	Gm37022	2.80403	1.17257	1.22305	0.958726	0.337697	NA	0.366	0.151
ENSMUSG00000026241	Nppc	33.2171	-2.32434	0.499298	-4.65521	3.23647e-06	0.000136509	0.612	2.615
ENSMUSG00000053333	Dis3l2	1387.68	-0.268052	0.159664	-1.67885	0.0931818	0.286334	0.77	0.844
ENSMUSG00000084106	Gm6136	1692.1	-0.119149	0.248326	-0.479806	0.631365	0.82307	410.092	392.995
ENSMUSG00000099401	Gm28375	3.38453	-3.56567	1.50168	-2.37445	0.017575	NA	0.001	0.012
ENSMUSG00000026247	Ecel1	17.2169	0.597913	0.768621	0.777903	0.436626	0.686034	0.2	0.118
ENSMUSG00000036480	Prss56	1.06296	-1.84665	2.11919	-0.871391	0.383541	NA	0.013	0.049
ENSMUSG00000026254	Eif4e2	1728.52	-0.207497	0.192755	-1.07648	0.281712	0.545029	12.58	12.906
ENSMUSG00000026255	Efhd1	44.4478	1.2582	0.515561	2.44046	0.0146688	0.0848296	0.288	0.112
ENSMUSG00000048000	Gigyf2	2816.62	0.173378	0.164168	1.0561	0.290921	0.55452	5.167	4.174
ENSMUSG00000079436	Kcnj13	99.873	-0.42123	1.75582	-0.239905	0.810404	0.918105	2.828	3.617
ENSMUSG00000026259	Ngef	761.116	3.65577	0.647698	5.64425	1.659e-08	1.6941e-06	3.365	0.247
ENSMUSG00000079434	Neu2	39.4	3.06768	0.638804	4.80222	1.56915e-06	7.53581e-05	0.211	0.023
ENSMUSG00000026288	Inpp5d	227.365	0.707514	0.266584	2.654	0.00795445	0.0552284	0.518	0.282
ENSMUSG00000026289	Atg16l1	1543.4	1.12884	0.300314	3.75886	0.000170688	0.00312423	12.548	5.254
ENSMUSG00000056055	Sag	31477.9	1.50627	1.17776	1.27893	0.200922	0.451033	249.358	80.896
ENSMUSG00000070738	Dgkd	5903.38	-0.225023	0.237172	-0.948775	0.342735	0.604801	12.827	13.776
ENSMUSG00000101942	Gm19582	2.80107	0.301549	1.15745	0.26053	0.794455	NA	0.66	0.484
ENSMUSG00000005501	Usp40	1105.42	-0.392261	0.155179	-2.5278	0.0114779	0.0714187	3.119	3.659
ENSMUSG00000092220	Gm20528	10.6318	0.407409	0.741646	0.549331	0.582778	0.791745	0.017	0.012
ENSMUSG00000079429	Mroh2a	3.70906	-0.535493	1.14047	-0.469537	0.638686	NA	0.014	0.019
ENSMUSG00000044783	Hjurp	12655.3	-0.864844	0.327919	-2.63737	0.00835526	0.0571812	129.35	209.329
ENSMUSG00000036251	Trpm8	11.5056	-1.19685	0.66394	-1.80265	0.0714433	0.242079	0.013	0.027
ENSMUSG00000026295	Spp2	8.47551	1.58672	0.905343	1.75262	0.0796676	0.259391	0.169	0.053
ENSMUSG00000099553	Gm29538	1.66302	-2.44903	2.09627	-1.16828	0.242695	NA	0.007	0.037
ENSMUSG00000062310	Glrp1	1.03394	-1.74166	2.43595	-0.714982	0.47462	NA	0.007	0.023
ENSMUSG00000049866	Arl4c	2527.89	-1.46669	0.341278	-4.29764	1.72628e-05	0.000503658	12.501	32.255
ENSMUSG00000036206	Sh3bp4	248.981	0.257999	0.354485	0.727812	0.466729	0.707791	0.626	0.46
ENSMUSG00000055013	Agap1	5169.59	-0.221524	0.21968	-1.0084	0.313265	0.578484	2.641	2.829
ENSMUSG00000102009	4933400F21Rik	1.80779	-2.10472	1.54731	-1.36025	0.173751	NA	0.004	0.016
ENSMUSG00000067081	Asb18	3.85819	-1.0539	1.00287	-1.05089	0.29331	NA	0.008	0.014
ENSMUSG00000026301	Iqca	20.329	-0.809419	0.901228	-0.898129	0.369117	0.628818	0.035	0.056
ENSMUSG00000044337	Ackr3	68.7984	-0.831423	0.393067	-2.11522	0.0344114	0.151346	0.804	1.313
ENSMUSG00000034432	Cops8	1648.98	0.108256	0.111281	0.972823	0.330641	0.594364	34.636	29.002
ENSMUSG00000048126	Col6a3	498.314	0.696914	0.619709	1.12458	0.260766	0.523366	1.844	0.939
ENSMUSG00000026303	Mlph	25.8167	0.673538	0.879968	0.765412	0.444026	0.691069	0.096	0.055
ENSMUSG00000026305	Lrrfip1	355.833	0.666582	0.269058	2.47747	0.0132319	0.0789439	0.637	0.361
ENSMUSG00000034353	Ramp1	109.775	0.20381	0.551888	0.369296	0.711907	0.868191	0.31	0.246
ENSMUSG00000034343	Ube2f	612.135	0.270121	0.16231	1.66422	0.096068	0.291525	3.352	2.509
ENSMUSG00000083064	Gm7785	16.5211	0.603316	0.838984	0.719103	0.472077	0.711646	2.755	1.47
ENSMUSG00000026307	Scly	251.153	0.301755	0.249957	1.20723	0.227345	0.485148	2.327	1.667
ENSMUSG00000049515	Espnl	8.35104	0.135243	0.790388	0.17111	0.864137	0.943653	0.071	0.059
ENSMUSG00000026308	Klhl30	13.4609	-0.220201	0.622635	-0.35366	0.723594	0.873883	0.242	0.26
ENSMUSG00000047443	Erfe	22.004	-1.47962	0.747194	-1.98024	0.0476768	0.186104	0.31	0.772
ENSMUSG00000026309	Ilkap	1386.04	-0.424305	0.186969	-2.26939	0.0232449	0.116027	10.138	12.22
ENSMUSG00000067071	Hes6	1191.99	-1.03735	0.297116	-3.49141	0.000480478	0.00686632	76.369	141.263
ENSMUSG00000055866	Per2	306.437	-0.744332	0.320585	-2.3218	0.0202439	0.105811	1.178	1.798
ENSMUSG00000034292	Traf3ip1	368.412	-0.172766	0.16385	-1.05442	0.291692	0.555551	1.987	2.022
ENSMUSG00000026311	Asb1	703.042	-0.0214529	0.232564	-0.0922454	0.926503	0.971951	6.806	6.047
ENSMUSG00000100980	Gm29100	1.07607	0.0356334	2.02172	0.0176253	0.985938	NA	0.048	0.043
ENSMUSG00000007805	Twist2	2.68014	-0.886178	1.36408	-0.649652	0.515917	NA	0.013	0.02
ENSMUSG00000026313	Hdac4	1468.86	-0.286251	0.166738	-1.71678	0.0860202	0.272128	1.053	1.174
ENSMUSG00000026260	Ndufa10	3462.46	0.255171	0.203729	1.2525	0.210386	0.463223	22.082	16.668
ENSMUSG00000073616	Cops9	1033.07	-0.0466338	0.139884	-0.333374	0.738852	0.881884	44.805	41.425
ENSMUSG00000044055	Otos	1.37011	0.221747	2.29667	0.0965514	0.923083	NA	0.059	0.052
ENSMUSG00000100781	Gm29481	1.54384	-2.39791	2.07262	-1.15695	0.247293	NA	0.004	0.021
ENSMUSG00000034220	Gpc1	938.129	-0.0212968	0.231222	-0.0921055	0.926614	0.971951	6.431	5.831
ENSMUSG00000034212	Ankmy1	80.2797	0.957983	0.537879	1.78104	0.0749065	0.249671	0.56	0.27
ENSMUSG00000047067	Dusp28	410.544	0.127478	0.29428	0.433188	0.664879	0.84187	63.428	53.045
ENSMUSG00000097251	5033417F24Rik	80.2832	0.117924	0.345526	0.341289	0.732886	0.879272	6.492	5.528
ENSMUSG00000026269	Rnpepl1	391.595	-0.31222	0.163909	-1.90484	0.0568003	0.208443	5.188	5.789
ENSMUSG00000100632	9430060I03Rik	36.9962	-0.526519	0.365051	-1.44232	0.149213	0.380024	0.347	0.456
ENSMUSG00000026270	Capn10	1161.84	-0.723699	0.159069	-4.5496	5.37474e-06	0.000205277	13.604	20.218
ENSMUSG00000026271	Gpr35	90.8249	0.42524	0.253816	1.67539	0.0938585	0.287649	0.699	0.476
ENSMUSG00000014602	Kif1a	3811.27	0.537351	0.299264	1.79557	0.0725626	0.244166	7.201	4.493
ENSMUSG00000026272	Agxt	4.47934	-0.185712	0.932059	-0.199249	0.842068	0.932729	0.084	0.086
ENSMUSG00000084989	Crocc2	33.7127	-2.31895	0.781725	-2.96646	0.00301253	0.0275054	0.047	0.216
ENSMUSG00000047793	Sned1	183.221	-0.874774	0.321218	-2.72331	0.00646321	0.0479355	0.54	0.907
ENSMUSG00000026273	Mterf4	549.909	-0.293771	0.1662	-1.76757	0.077132	0.254259	14.484	16.198
ENSMUSG00000101172	Gm28535	21.0162	-1.27783	0.552269	-2.31379	0.0206794	0.107394	0.207	0.449
ENSMUSG00000100351	Gm7867	1.46759	-0.301066	1.72907	-0.17412	0.861771	NA	0.503	0.602
ENSMUSG00000026274	Pask	1374.42	-1.09377	0.24253	-4.50984	6.48778e-06	0.000237502	5.516	10.691
ENSMUSG00000026275	Ppp1r7	3071.56	0.295108	0.164867	1.78997	0.0734582	0.246368	25.467	18.941
ENSMUSG00000034107	Ano7	4.00681	-0.216835	1.21436	-0.178559	0.858284	NA	0.015	0.017
ENSMUSG00000034088	Hdlbp	6433.53	0.142807	0.207156	0.689372	0.490589	0.726874	20.381	16.409
ENSMUSG00000026276	Septin2	11.5412	-0.420069	0.638613	-0.657783	0.510678	0.741796	0.081	0.094
ENSMUSG00000034066	Farp2	952.832	0.253341	0.261941	0.967169	0.33346	0.596404	2.204	1.68
ENSMUSG00000026277	Stk25	4692.02	0.245299	0.183565	1.33631	0.181448	0.425305	27.215	20.873
ENSMUSG00000100927	Gm28536	11.0858	0.114364	0.713633	0.160256	0.872679	0.947587	1.713	1.41
ENSMUSG00000026278	Bok	457.731	-0.883371	0.249126	-3.54588	0.000391308	0.00585363	6.345	10.564
ENSMUSG00000026279	Thap4	1071.26	0.127626	0.145344	0.878096	0.379892	0.637876	4.528	3.744
ENSMUSG00000101952	Gm10550	6.06266	0.262314	0.980672	0.267484	0.789097	0.906102	0.065	0.051
ENSMUSG00000026280	Atg4b	1508.86	0.172883	0.12155	1.42232	0.154933	0.38926	8.668	6.954
ENSMUSG00000026281	Dtymk	1241.15	-0.43997	0.233601	-1.88343	0.0596427	0.215327	22.818	27.488
ENSMUSG00000026283	Ing5	963.193	0.12512	0.200088	0.625326	0.531757	0.758427	11.797	9.843
ENSMUSG00000073609	D2hgdh	240.084	0.199099	0.200044	0.99528	0.3196	0.583229	1.961	1.533
ENSMUSG00000101660	Gm18666	5.79018	0.775032	0.783505	0.989186	0.322572	0.586326	0.153	0.081
ENSMUSG00000093805	Gal3st2b	70.6134	-0.262848	0.487026	-0.539701	0.589403	0.796962	0.558	0.628
ENSMUSG00000099624	Gm7889	13.6129	-0.412849	0.7151	-0.57733	0.563716	0.779956	0.214	0.269
ENSMUSG00000034000	Neu4	9.19182	0.130187	1.58345	0.0822176	0.934474	0.9749	0.057	0.042
ENSMUSG00000026285	Pdcd1	9.69189	3.65841	1.28806	2.84025	0.00450787	0.037012	0.208	0.014
ENSMUSG00000100347	Gm7895	80.7175	0.272729	0.470905	0.57916	0.562481	0.779142	17.528	12.955
ENSMUSG00000051185	Fam174a	703.251	0.249936	0.217668	1.14824	0.250868	0.513261	7.555	5.857
ENSMUSG00000081051	Gm15427	839.738	-0.25549	0.415287	-0.615214	0.538413	0.762893	290.758	301.485
ENSMUSG00000040710	St8sia4	101.657	0.335821	0.295028	1.13827	0.255008	0.517646	0.257	0.181
ENSMUSG00000095955	Gm22360	2.70985	1.96895	1.29648	1.51869	0.12884	NA	10.135	2.517
ENSMUSG00000040693	Slco4c1	29.0591	0.529995	0.723024	0.733025	0.463543	0.705537	0.138	0.089
ENSMUSG00000097814	Panct2	15.8992	0.404055	0.917529	0.440372	0.659667	0.83861	0.107	0.074
ENSMUSG00000044757	Gm6430	45.8614	-0.258087	0.378803	-0.681321	0.495668	0.730161	6.706	7.213
ENSMUSG00000101348	Gm7135	1.39119	2.17667	2.03643	1.06886	0.285131	NA	0.002	0
ENSMUSG00000044768	D1Ertd622e	608.042	-0.0861581	0.227574	-0.378595	0.704989	0.864442	2.152	2.089
ENSMUSG00000040648	Ppip5k2	1263.19	-0.365448	0.172374	-2.12009	0.0339987	0.150089	3.555	4.089
ENSMUSG00000026333	Gin1	213.885	0.00290078	0.218854	0.0132544	0.989425	0.996639	1.815	1.638
ENSMUSG00000026335	Pam	1076.34	-0.00892293	0.36859	-0.0242083	0.980686	0.993623	0.683	0.624
ENSMUSG00000100711	Gm29461	5.06618	-1.84205	0.93941	-1.96086	0.049895	0.19181	0.042	0.132
ENSMUSG00000100009	Gm7967	22.4203	2.46488	1.37898	1.78747	NA	NA	0.252	0.037
ENSMUSG00000099686	Gm29460	1.59729	3.75396	2.15165	1.74469	0.0810382	NA	0.834	0
ENSMUSG00000067028	Cntnap5b	40.7431	-0.64733	0.780343	-0.829545	0.406796	0.661082	0.007	0.01
ENSMUSG00000082431	Prdx2-ps1	118.768	-1.14429	0.956397	-1.19646	0.231518	0.49033	24.987	42.802
ENSMUSG00000099835	Gm29668	6.95676	-0.0448513	0.732961	-0.061192	0.951206	0.982345	5.407	4.974
ENSMUSG00000050840	Cdh20	1041.41	1.64959	0.396571	4.15963	3.18758e-05	0.000824604	1.338	0.379
ENSMUSG00000047496	Rnf152	78.6929	-0.572344	0.348388	-1.64284	0.100416	0.299091	0.182	0.24
ENSMUSG00000097482	Gm17634	1.82654	-3.02481	2.08504	-1.45072	0.146858	NA	0	0.049
ENSMUSG00000101214	Gm28403	87.6369	-0.093849	0.348865	-0.269013	0.78792	0.905668	0.123	0.121
ENSMUSG00000067017	Capza1-ps1	346.607	-2.1665	0.712974	-3.03868	0.00237616	0.0232487	10.788	44.36
ENSMUSG00000056536	Pign	1241.45	-0.144542	0.148679	-0.972173	0.330964	0.594584	1.862	1.876
ENSMUSG00000026319	Relch	3440.37	0.00660654	0.152603	0.0432922	0.965469	0.988229	8.293	7.484
ENSMUSG00000026321	Tnfrsf11a	59.6632	0.298126	0.357428	0.834086	0.404233	0.658945	0.198	0.143
ENSMUSG00000099843	Gm7160	31.5051	0.700361	0.519839	1.34726	0.177895	0.421071	0.825	0.471
ENSMUSG00000038866	Zcchc2	848.744	0.101271	0.272162	0.372098	0.70982	0.866766	4.459	3.834
ENSMUSG00000097612	Gm26509	1.08852	1.77744	2.33369	0.761645	0.446272	NA	0.495	0.139
ENSMUSG00000101583	Gm20753	40.2417	1.17657	0.401957	2.92711	0.00342132	0.0304218	0.675	0.274
ENSMUSG00000044340	Phlpp1	2253.26	0.429812	0.291874	1.47259	0.140861	0.367092	2.652	1.824
ENSMUSG00000099604	Gm6651	4.54148	-5.68262	2.9517	-1.9252	0.0542038	0.202196	0	7.121
ENSMUSG00000057329	Bcl2	343.903	0.140976	0.259845	0.542539	0.587447	0.795508	0.431	0.356
ENSMUSG00000009905	Kdsr	1110.69	-0.188	0.233526	-0.80505	0.420791	0.673279	5.45	5.749
ENSMUSG00000009907	Vps4b	1577.05	-0.210865	0.171727	-1.22791	0.219482	0.474525	8.888	9.203
ENSMUSG00000067006	Serpinb5	1.18235	-0.0490396	2.7641	-0.0177416	0.985845	NA	0.003	0.003
ENSMUSG00000067001	Serpinb7	1.19017	-2.64273	2.31878	-1.13971	0.254408	NA	0.001	0.008
ENSMUSG00000092572	Serpinb10	1.79029	-0.0238873	1.41322	-0.0169027	0.986514	NA	0.027	0.026
ENSMUSG00000026315	Serpinb8	55.2181	0.953454	0.561223	1.69889	0.0893405	0.279083	0.675	0.296
ENSMUSG00000026312	Cdh7	47.4705	1.43752	0.910383	1.57903	0.114329	0.323406	0.05	0.015
ENSMUSG00000047216	Cdh19	49.9889	2.68272	0.614163	4.36809	1.25338e-05	0.00039606	0.123	0.018
ENSMUSG00000100555	Gm8173	2.23324	-0.904349	1.45444	-0.621786	0.534083	NA	0.102	0.165
ENSMUSG00000038702	Dsel	371.532	-0.263273	0.294331	-0.894481	0.371065	0.630171	12.467	13.643
ENSMUSG00000097648	9330185C12Rik	284.121	-0.704419	1.15631	-0.609193	0.542396	0.765295	0.851	1.321
ENSMUSG00000100515	Gm17916	10.8177	-0.826937	0.77963	-1.06068	0.288836	0.552499	0.094	0.154
ENSMUSG00000070695	Cntnap5a	1773.35	-0.745692	0.386008	-1.9318	0.0533838	0.200223	0.325	0.492
ENSMUSG00000026374	Tsn	3975.86	-0.14284	0.139174	-1.02634	0.30473	0.569757	47.264	47.63
ENSMUSG00000026377	Nifk	1648.29	-0.0446151	0.133262	-0.334793	0.737781	0.881614	28.394	26.135
ENSMUSG00000064302	Clasp1	5994.09	0.177367	0.211393	0.839038	0.401448	0.656183	6.5	5.27
ENSMUSG00000107722	2900060B14Rik	21.6173	-0.427908	0.464551	-0.921123	0.356986	0.617973	6.381	7.57
ENSMUSG00000026380	Tfcp2l1	91.3676	0.725031	0.410548	1.76601	0.0773947	0.254943	0.275	0.152
ENSMUSG00000048402	Gli2	489.343	-1.2464	0.228388	-5.45736	4.83279e-08	4.1295e-06	0.312	0.661
ENSMUSG00000097408	Gm26831	22.6048	-0.404643	0.542839	-0.745419	0.456018	0.699974	2.978	3.441
ENSMUSG00000099860	Gm29456	1.38423	-2.13023	1.7596	-1.21064	0.226035	NA	0.007	0.025
ENSMUSG00000037035	Inhbb	2198.56	-0.654205	0.317383	-2.06125	0.039279	0.16467	57.533	78.622
ENSMUSG00000004451	Ralb	287.998	0.0689855	0.22181	0.311012	0.755792	0.888827	1.765	1.493
ENSMUSG00000098447	Gm27184	15.3154	0.0954677	0.504285	0.189313	0.849848	0.936754	0.491	0.417
ENSMUSG00000098923	Tmem185b	496.239	0.497347	0.220273	2.25787	0.0239539	0.118348	40.648	26.206
ENSMUSG00000101731	3830432H09Rik	25.082	-0.464443	0.374879	-1.23891	0.215377	0.469313	0.774	0.974
ENSMUSG00000026383	Epb41l5	4122.22	-0.161029	0.198408	-0.811604	0.417019	0.66999	8.753	8.985
ENSMUSG00000026384	Ptpn4	4523.11	-0.0607594	0.201495	-0.301543	0.763	0.892167	5.35	5.114
ENSMUSG00000091876	Gm3851	1.63083	-0.301067	1.59661	-0.188566	0.850433	NA	1.152	1.221
ENSMUSG00000100636	Gm3551	1.29117	2.04946	2.01987	1.01465	0.310273	NA	0.979	0.199
ENSMUSG00000101224	Gm28209	8.90445	-1.87737	0.94473	-1.98721	0.0468997	0.184125	0.284	1.028
ENSMUSG00000036975	Tmem177	434.516	-0.199737	0.176875	-1.12926	0.25879	0.520797	16.294	17.036
ENSMUSG00000036962	Cfap221	15.6113	-0.043539	0.74708	-0.0582789	0.953526	0.983118	0.057	0.053
ENSMUSG00000026387	Sctr	4.86486	-0.448729	0.982338	-0.456797	0.647817	0.831581	0.011	0.014
ENSMUSG00000050777	Tmem37	40.8731	-0.397137	0.403271	-0.984788	0.324728	0.588544	1.212	1.442
ENSMUSG00000026385	Dbi	1254.78	0.178321	0.29514	0.604192	0.545716	0.767913	36.726	29.271
ENSMUSG00000026388	3110009E18Rik	130.472	-0.314694	0.199101	-1.58057	0.113975	0.322683	0.378	0.425
ENSMUSG00000026389	Steap3	190.467	0.10381	0.299724	0.34635	0.72908	0.876866	0.565	0.486
ENSMUSG00000036907	C1ql2	115.871	0.329473	0.37708	0.873748	0.382256	0.64001	12.522	8.898
ENSMUSG00000026390	Marco	3.01521	-1.06974	1.30674	-0.818633	0.412996	NA	0.02	0.04
ENSMUSG00000097881	Celrr	10.8008	2.94881	1.10544	2.66754	0.00764092	0.0538543	0.031	0.004
ENSMUSG00000003721	Insig2	586.344	0.101876	0.180447	0.564574	0.572363	0.785168	4.36	3.713
ENSMUSG00000104253	Gm37174	57.1209	-0.588507	0.427271	-1.37736	0.1684	0.409039	3.023	4.287
ENSMUSG00000101791	2210011K15Rik	2.72634	0.940695	1.46708	0.641204	0.52139	NA	0.225	0.112
ENSMUSG00000026339	Ccdc93	607.338	-0.0287779	0.110898	-0.259498	0.795251	0.90923	1.612	1.484
ENSMUSG00000050534	Htr5b	4.03753	1.80344	1.99626	0.903409	0.366309	NA	0.016	0.004
ENSMUSG00000001674	Ddx18	933.903	0.382694	0.141607	2.7025	0.00688193	0.0502044	15.905	11.032
ENSMUSG00000102488	Gm37920	1.19412	1.96547	1.88977	1.04006	0.298314	NA	0.733	0.175
ENSMUSG00000036815	Dpp10	758.474	1.59652	0.787548	2.02721	0.0426414	0.173395	0.04	0.012
ENSMUSG00000099574	1700121L03Rik	3.112	-0.632759	1.22101	-0.518225	0.604301	NA	0.104	0.154
ENSMUSG00000026341	Actr3	3935.37	0.0430234	0.102742	0.418751	0.675398	0.846899	18.741	16.428
ENSMUSG00000026342	Slc35f5	748.708	-0.504673	0.207576	-2.43127	0.0150462	0.0862992	3.662	4.609
ENSMUSG00000026343	Gpr39	1.17895	2.33638	2.71386	0.860907	0.389289	NA	0.001	0
ENSMUSG00000026344	Lypd1	60.0146	0.494247	0.735596	0.6719	0.501647	0.734452	0.179	0.118
ENSMUSG00000049690	Nckap5	159.259	0.0702908	0.337491	0.208274	0.835015	0.929922	0.04	0.033
ENSMUSG00000036155	Mgat5	1405.15	1.29749	0.279626	4.6401	3.48237e-06	0.000144062	1.264	0.473
ENSMUSG00000099471	Gm8451	49.995	-0.161758	0.408841	-0.39565	0.692364	0.856712	21.389	21.07
ENSMUSG00000026347	Tmem163	19.5914	0.947387	0.87194	1.08653	0.277245	0.540711	0.02	0.009
ENSMUSG00000026348	Acmsd	1.59564	-1.73471	1.75132	-0.990515	0.321922	NA	0.005	0.017
ENSMUSG00000102014	2900009J06Rik	51.5196	-0.238829	0.365627	-0.653204	0.513625	0.744461	0.366	0.392
ENSMUSG00000026349	Ccnt2	2195.67	-0.270889	0.110321	-2.45546	0.0140705	0.0823765	12.411	13.582
ENSMUSG00000051590	Map3k19	87.5248	-0.557407	0.590974	-0.943201	0.345578	0.607397	0.328	0.451
ENSMUSG00000036104	Rab3gap1	2726.84	0.720816	0.270681	2.66297	0.00774546	0.0543569	9.846	5.544
ENSMUSG00000036086	Zranb3	771.832	-0.629699	0.201801	-3.1204	0.00180608	0.0189927	0.875	1.214
ENSMUSG00000099760	Gm28800	5.40526	0.510915	1.75405	0.291278	0.770839	0.895907	0.048	0.026
ENSMUSG00000058603	Rpl28-ps1	84.1856	-0.0911843	0.365553	-0.249442	0.803019	0.913012	41.385	38.894
ENSMUSG00000056211	R3hdm1	1111.62	0.121244	0.182177	0.665527	0.505714	0.738273	1.643	1.364
ENSMUSG00000026353	Ubxn4	3806.87	0.0389749	0.131664	0.296018	0.767217	0.894157	23.067	20.464
ENSMUSG00000026354	Lct	11.6942	-0.716749	0.667459	-1.07385	0.282891	0.546243	0.031	0.046
ENSMUSG00000026355	Mcm6	4587.07	-0.622106	0.40465	-1.53739	0.124197	0.340146	27.726	37.368
ENSMUSG00000026356	Dars	3067.08	0.184327	0.148812	1.23866	0.215472	0.469394	13.19	10.442
ENSMUSG00000100078	Gm6170	134.761	-0.466634	0.285967	-1.63178	0.102726	0.303041	18.091	22.459
ENSMUSG00000045382	Cxcr4	120.133	0.710982	0.448675	1.58462	0.113052	0.321334	9.184	5.059
ENSMUSG00000042581	Thsd7b	46.0734	-2.72816	0.823443	-3.31311	0.000922638	0.0114092	0.002	0.014
ENSMUSG00000089648	Gm15790	37.4825	-0.537433	0.32387	-1.65941	0.0970332	0.293246	6.03	7.862
ENSMUSG00000094122	Rpl31-ps9	1.12317	0.821102	2.17086	0.378238	0.705254	NA	0.375	0.175
ENSMUSG00000026399	Cd55	47.1599	-0.931361	0.643367	-1.44763	0.147719	0.377658	0.346	0.59
ENSMUSG00000085526	Gm16083	17.3815	0.0854485	0.633735	0.134833	0.892744	0.955741	0.028	0.024
ENSMUSG00000101904	Gm29427	7.79777	0.810711	0.833441	0.972728	0.330689	0.594364	0.05	0.026
ENSMUSG00000026409	Pfkfb2	69.8092	0.243185	0.273449	0.889327	0.373827	0.632455	0.384	0.295
ENSMUSG00000046404	Yod1	912.727	-0.21474	0.150885	-1.42321	0.154676	0.388884	24.994	25.972
ENSMUSG00000042510	AA986860	80.3562	0.767968	0.391987	1.95916	0.0500935	0.192413	2.026	1.113
ENSMUSG00000026415	Fcamr	14.4657	3.03815	0.82881	3.66567	0.000246689	0.00419112	0.491	0.051
ENSMUSG00000026417	Pigr	1.18837	1.20075	2.00067	0.600174	0.54839	NA	0.014	0.005
ENSMUSG00000016524	Il19	1.12643	-2.99077	3.35061	-0.892604	0.372069	NA	0	0.04
ENSMUSG00000016529	Il10	2.94814	2.70634	2.34655	1.15333	0.248776	NA	0.208	0.024
ENSMUSG00000016528	Mapkapk2	1593.07	0.155252	0.252832	0.614053	0.53918	0.763245	7.97	6.572
ENSMUSG00000016526	Dyrk3	298.989	-0.00270941	0.343423	-0.00788942	0.993705	0.998905	5.244	4.922
ENSMUSG00000026427	Eif2d	969.571	-0.137628	0.123375	-1.11553	0.264624	0.527411	5.582	5.52
ENSMUSG00000026430	Rassf5	67.2975	1.00415	0.410139	2.44832	0.0143525	0.0835731	0.185	0.082
ENSMUSG00000042349	Ikbke	32.4482	-0.152639	0.510712	-0.298875	0.765035	0.893007	0.296	0.281
ENSMUSG00000026425	Srgap2	1880.57	-0.427694	0.247952	-1.7249	0.0845447	0.269482	1.437	1.761
ENSMUSG00000055184	Fam72a	124.664	-0.42761	0.260703	-1.64022	0.100959	0.300063	1.86	2.23
ENSMUSG00000004552	Ctse	34.1515	-0.410984	0.622051	-0.660692	0.50881	0.740468	0.12	0.139
ENSMUSG00000052688	Rab7b	67.9141	1.18518	0.334131	3.54706	0.000389557	0.00584178	0.855	0.333
ENSMUSG00000042251	Pm20d1	25.2541	0.148385	0.517137	0.286936	0.774161	0.898231	0.266	0.212
ENSMUSG00000013275	Slc41a1	1012.08	-0.0808106	0.250951	-0.322017	0.747439	0.886072	10.254	9.983
ENSMUSG00000026433	Rab29	43.1899	0.220585	0.355813	0.619945	0.535294	0.760584	1.713	1.309
ENSMUSG00000026434	Nucks1	9495.14	-0.370311	0.195651	-1.89272	0.0583955	0.212684	67.039	77.061
ENSMUSG00000100037	Gm29103	3.24813	-1.03065	1.41169	-0.730077	0.465343	NA	0.004	0.008
ENSMUSG00000026436	Elk4	1142.88	-0.0759945	0.107547	-0.706613	0.479807	0.71786	8.894	8.496
ENSMUSG00000059149	Mfsd4a	61.8002	1.42588	0.822272	1.73407	0.0829048	0.2668	0.126	0.043
ENSMUSG00000103966	Gm37120	2.3681	-1.06521	1.18972	-0.895346	0.370602	NA	0.071	0.133
ENSMUSG00000026437	Cdk18	12.2711	1.17057	1.10794	1.05653	0.290728	0.554368	0.041	0.016
ENSMUSG00000079330	Lemd1	1.61985	-0.0490349	2.20437	-0.0222444	0.982253	NA	0.001	0.001
ENSMUSG00000101549	Gm29630	7.94759	0.203827	0.899141	0.226691	0.820664	0.923648	0.155	0.113
ENSMUSG00000042115	Klhdc8a	1016.34	0.452542	0.620611	0.729187	0.465887	0.707122	11.091	6.838
ENSMUSG00000009772	Nuak2	341.258	-0.786647	0.388617	-2.02422	0.0429473	0.174123	2.504	3.974
ENSMUSG00000100658	F730311O21Rik	1.16632	1.37937	2.01477	0.684631	0.493577	NA	0.048	0.016
ENSMUSG00000042066	Tmcc2	2584.91	-0.109842	0.184369	-0.595772	0.551328	0.771334	15.955	15.823
ENSMUSG00000042046	Dstyk	2041.12	0.260364	0.28154	0.924784	0.355078	0.61656	9.917	7.719
ENSMUSG00000097760	6030442K20Rik	41.9372	-0.428515	0.417772	-1.02571	0.305027	0.570147	0.628	0.772
ENSMUSG00000026439	Rbbp5	1386.9	0.0436476	0.163495	0.266967	0.789495	0.906308	10.325	9.173
ENSMUSG00000048174	Tmem81	44.7808	0.465065	0.335259	1.38718	0.165386	0.404592	4.584	3.058
ENSMUSG00000053024	Cntn2	540.72	-0.765777	0.596583	-1.28361	0.19928	0.449201	2.372	3.756
ENSMUSG00000026442	Nfasc	549.461	0.214095	0.381954	0.560526	0.575121	0.786583	0.475	0.375
ENSMUSG00000026443	Lrrn2	159.532	-0.253251	0.271041	-0.934361	0.350118	0.611566	0.359	0.386
ENSMUSG00000102709	Gm38308	1.46336	-0.62392	1.45293	-0.429422	0.667616	NA	0.154	0.218
ENSMUSG00000054387	Mdm4	1898.3	-0.248975	0.164828	-1.51051	0.130914	0.350731	5.057	5.478
ENSMUSG00000100228	Gm29257	10.9819	-0.296502	0.700417	-0.423322	0.67206	0.845446	3.288	3.626
ENSMUSG00000026447	Pik3c2b	217.778	-0.420938	0.368788	-1.14141	0.2537	0.516704	0.544	0.679
ENSMUSG00000102425	Gm26616	15.8775	0.2679	0.57464	0.466205	0.641068	0.82898	1.063	0.804
ENSMUSG00000046062	Ppp1r15b	2832.6	-0.0756871	0.104564	-0.723837	0.469166	0.709988	64.814	61.473
ENSMUSG00000041757	Plekha6	627.706	1.1705	0.166612	7.0253	2.13601e-12	6.37582e-10	0.756	0.3
ENSMUSG00000101693	Gm19461	2.50129	1.41907	1.67113	0.84917	0.395787	NA	0.04	0.014
ENSMUSG00000070645	Ren1	1.44915	-2.49835	1.78513	-1.39953	0.161654	NA	0.007	0.04
ENSMUSG00000070644	Etnk2	16.3614	0.536822	0.636276	0.843693	0.398841	0.654182	0.22	0.142
ENSMUSG00000070643	Sox13	57.1063	0.412097	0.31868	1.29314	0.195963	0.445104	0.376	0.259
ENSMUSG00000090553	Snrpe	1109.48	-0.162184	0.212471	-0.763323	0.445271	0.691932	32.909	33.179
ENSMUSG00000051998	Lax1	16.8957	1.1578	0.793246	1.45958	0.144406	0.372229	0.291	0.12
ENSMUSG00000026463	Atp2b4	1335.23	1.03041	0.417979	2.46522	0.0136929	0.0808245	3.489	1.599
ENSMUSG00000010311	Optc	443.813	-0.49233	0.777759	-0.633012	0.526726	0.755391	10.373	13.829
ENSMUSG00000041577	Prelp	209.676	0.679549	0.397845	1.70808	0.0876223	0.275284	6.302	3.609
ENSMUSG00000041559	Fmod	191.958	0.0579234	0.70013	0.0827323	0.934064	0.9749	4.445	3.682
ENSMUSG00000020423	Btg2	7078.24	-0.291021	0.205913	-1.41332	0.15756	0.393453	303.48	333.557
ENSMUSG00000102380	Gm38140	33.105	-0.0410618	0.383906	-0.106958	0.914822	0.966488	1.794	1.693
ENSMUSG00000026450	Chit1	12.2462	2.26681	1.30383	1.73858	0.0821085	0.264937	0.049	0.009
ENSMUSG00000064246	Chil1	3167.46	2.75632	0.285794	9.64441	5.19084e-22	2.51782e-18	144.432	18.696
ENSMUSG00000042451	Mybph	3484.12	2.9138	0.55773	5.22439	1.74727e-07	1.20215e-05	171.776	18.911
ENSMUSG00000042429	Adora1	4278.68	1.31787	0.402857	3.27131	0.00107049	0.0127499	24.279	9.167
ENSMUSG00000026459	Myog	1822.11	0.465825	1.00529	0.463372	0.643098	0.82929	113.114	78.891
ENSMUSG00000026458	Ppfia4	2588.67	0.326731	0.393396	0.83054	0.406233	0.660555	18.971	14.098
ENSMUSG00000042305	Tmem183a	1509.64	-0.0374351	0.13128	-0.285154	0.775526	0.898874	19.781	18.421
ENSMUSG00000026456	Cyb5r1	687.974	0.738142	0.197715	3.73335	0.000188946	0.00338811	28.64	15.545
ENSMUSG00000026457	Adipor1	5554.63	-0.180795	0.159762	-1.13165	0.257781	0.519981	58.719	60.299
ENSMUSG00000102722	Gm37935	15.0275	-0.0243946	0.497053	-0.0490783	0.960857	0.986952	2.983	2.772
ENSMUSG00000026455	Klhl12	1245.88	0.324612	0.225774	1.43778	0.150497	0.382459	8.363	6.17
ENSMUSG00000042229	Rabif	1070.82	0.164658	0.263317	0.625323	0.531759	0.758427	17.111	14.023
ENSMUSG00000096712	Gm15454	1.39303	-2.39797	2.07378	-1.15633	0.247546	NA	0.158	0.732
ENSMUSG00000101955	Gm29376	1.61626	-0.0849324	1.65148	-0.051428	0.958984	NA	0.081	0.082
ENSMUSG00000046367	Mgat4e	3.41518	-0.554554	1.24432	-0.445667	0.655838	NA	0.056	0.076
ENSMUSG00000042207	Kdm5b	5313.21	-0.151705	0.259235	-0.585202	0.558412	0.776192	14.134	14.507
ENSMUSG00000026452	Syt2	383.829	2.97647	0.433759	6.86204	6.78828e-12	1.75608e-09	0.756	0.087
ENSMUSG00000073557	Ppp1r12b	1493	0.215456	0.238886	0.901922	0.367098	0.626789	1.767	1.391
ENSMUSG00000026429	Ube2t	623.117	-0.720002	0.291955	-2.46614	0.0136577	0.0806409	8.982	13.35
ENSMUSG00000042793	Lgr6	11.1006	-0.037567	0.562571	-0.0667773	0.946759	0.980622	0.021	0.019
ENSMUSG00000097993	Ptprv	10.2079	0.047611	0.869741	0.0547416	0.956344	0.984652	0.116	0.107
ENSMUSG00000097988	Gm10535	1.92787	-0.898954	1.54799	-0.580725	0.561426	NA	0.076	0.142
ENSMUSG00000031506	Ptpn7	14.2617	0.95192	0.664529	1.43247	0.152008	0.385097	0.28	0.135
ENSMUSG00000026426	Arl8a	361.719	0.674892	0.281871	2.39433	0.0166509	0.0922506	8.927	5.161
ENSMUSG00000026424	Gpr37l1	465.171	3.08506	0.697213	4.42485	9.6509e-06	0.000323374	10.943	1.136
ENSMUSG00000079139	Gm4204	3664.46	-0.287921	0.154207	-1.86711	0.0618868	0.220925	632.917	702.099
ENSMUSG00000003051	Elf3	1.50132	-1.26016	1.71824	-0.733404	0.463312	NA	0.041	0.094
ENSMUSG00000041926	Rnpep	719.522	0.401435	0.308222	1.30242	0.192771	0.441524	8.444	5.694
ENSMUSG00000062580	Timm17a	1455.03	0.0414816	0.169556	0.244648	0.806729	0.915491	16.789	14.594
ENSMUSG00000048096	Lmod1	11.2945	-0.384392	0.753464	-0.510166	0.609935	0.80916	0.054	0.06
ENSMUSG00000041889	Shisa4	1350.58	0.0236643	0.213807	0.11068	0.91187	0.965304	66.074	59.248
ENSMUSG00000041879	Ipo9	3755.23	-0.496481	0.158713	-3.12816	0.00175904	0.0186395	14.439	18.341
ENSMUSG00000009418	Nav1	699.926	0.40246	0.321226	1.25289	0.210246	0.463019	0.598	0.399
ENSMUSG00000054412	Gm4793	10.0164	0.543149	0.740978	0.733016	0.463549	0.705537	0.094	0.057
ENSMUSG00000026421	Csrp1	971.255	0.314243	0.266516	1.17908	0.238368	0.499224	5.64	4.055
ENSMUSG00000041801	Phlda3	67.3422	1.85735	0.361054	5.14424	2.68611e-07	1.72569e-05	8.176	2.054
ENSMUSG00000026418	Tnni1	7.82902	2.68886	1.02579	2.62127	0.00876041	0.0589967	0.086	0.012
ENSMUSG00000041782	Lad1	45.7236	1.18608	0.610817	1.9418	0.0521617	0.197214	0.593	0.233
ENSMUSG00000026414	Tnnt2	12.8456	0.718071	0.910338	0.788796	0.430231	0.68086	0.08	0.044
ENSMUSG00000101482	Gm28883	5.12751	-0.626154	0.851287	-0.735538	0.462012	0.704518	2.549	3.406
ENSMUSG00000026413	Pkp1	10.0109	0.457806	0.774852	0.59083	0.554634	0.773445	0.053	0.034
ENSMUSG00000051985	Igfn1	143.358	-1.86228	0.647082	-2.87797	0.00400241	0.034179	0.321	1.042
ENSMUSG00000026411	Tmem9	2478.99	-1.00304	0.274434	-3.65494	0.000257241	0.00433245	13.879	25.13
ENSMUSG00000097918	Ascl5	3.88329	-1.25562	1.52985	-0.820743	0.411792	NA	0.646	1.308
ENSMUSG00000026407	Cacna1s	634.669	-2.54141	0.497529	-5.10805	3.25495e-07	2.03063e-05	0.792	4.35
ENSMUSG00000102717	Gm37759	2.22615	-0.842459	1.34998	-0.624051	0.532594	NA	0.107	0.179
ENSMUSG00000086264	Gm15850	32.103	1.15437	0.451177	2.55857	0.0105103	0.0669619	1.296	0.518
ENSMUSG00000041642	Kif21b	2861.91	-0.418684	0.383063	-1.09299	0.274398	0.538037	10.826	13.042
ENSMUSG00000087230	Mroh3	7.4128	-0.705431	1.01395	-0.695723	0.486602	0.723564	0.045	0.061
ENSMUSG00000041605	Inava	7.47363	0.37081	0.995653	0.372429	0.709574	0.866766	0.048	0.033
ENSMUSG00000097433	Gm26781	5.06023	-0.291038	1.11124	-0.261904	0.793395	0.908538	0.038	0.041
ENSMUSG00000041570	Camsap2	4786.11	0.481667	0.222447	2.16531	0.0303636	0.139008	15.815	10.475
ENSMUSG00000097403	9230116N13Rik	32.2197	-0.70021	0.392763	-1.78278	0.0746217	0.249236	1.431	2.092
ENSMUSG00000026404	Ddx59	436.603	-0.100085	0.196295	-0.50987	0.610142	0.809269	3.413	3.352
ENSMUSG00000041498	Kif14	735.661	-1.1426	0.425776	-2.68358	0.00728391	0.0521678	1.643	3.106
ENSMUSG00000104414	Gm37799	3.171	-1.66143	1.13877	-1.45897	0.144573	NA	0.031	0.082
ENSMUSG00000097229	Platr23	4.38485	0.446216	0.863019	0.51704	0.605128	0.806643	0.39	0.253
ENSMUSG00000041483	Zfp281	2121.72	-0.0681822	0.134549	-0.506744	0.612334	0.810901	85.419	81.018
ENSMUSG00000097113	Gm19705	4.75004	-0.18285	1.0966	-0.166743	0.867572	0.945098	0.033	0.032
ENSMUSG00000026398	Nr5a2	6.52141	-0.370503	0.714338	-0.518666	0.603994	0.806017	0.011	0.013
ENSMUSG00000098243	Gm4258	592.767	-0.615062	0.310961	-1.97794	0.0479355	0.186569	1.164	1.662
ENSMUSG00000026395	Ptprc	409.955	1.79295	0.390463	4.59185	4.39341e-06	0.000175033	1.161	0.289
ENSMUSG00000026393	Nek7	2501.67	0.138519	0.196533	0.704814	0.480926	0.718971	4.116	3.419
ENSMUSG00000019230	Lhx9	503.331	-2.10292	1.21799	-1.72655	0.0842479	0.269066	2.449	9.973
ENSMUSG00000079283	2310009B15Rik	253.168	-0.654594	0.225363	-2.90461	0.00367706	0.0320784	9.224	13.303
ENSMUSG00000102365	Gm37045	2.25425	-0.0272936	1.42705	-0.0191259	0.984741	NA	0.146	0.129
ENSMUSG00000056268	Dennd1b	2676.91	-0.146674	0.198032	-0.740658	0.458901	0.702508	2.629	2.676
ENSMUSG00000063681	Crb1	4568.57	1.70422	0.395934	4.30432	1.67503e-05	0.000491664	9.544	2.77
ENSMUSG00000033964	Zbtb41	2729.25	-0.559971	0.116756	-4.79607	1.61811e-06	7.69473e-05	16.013	21.418
ENSMUSG00000033952	Aspm	4063.02	-1.17498	0.357501	-3.28665	0.00101386	0.012218	14.365	28.599
ENSMUSG00000026368	F13b	3.70256	-1.08113	1.13361	-0.953703	0.340234	NA	0.025	0.049
ENSMUSG00000089991	Gm16332	5.6726	2.7461	1.04571	2.62607	0.00863771	0.058434	0.026	0.003
ENSMUSG00000085867	Gm5834	1.40767	1.09957	1.59982	0.687312	0.491886	NA	0.009	0.004
ENSMUSG00000103691	Gm38019	6.38051	-0.497637	0.971327	-0.512327	0.608422	0.808867	0.102	0.124
ENSMUSG00000026365	Cfh	1508.05	1.38755	0.410383	3.38111	0.000721945	0.00946431	5.911	1.938
ENSMUSG00000052726	Kcnt2	127.14	-0.0155772	0.847046	-0.01839	0.985328	0.99552	0.041	0.035
ENSMUSG00000101795	Gm5835	17.3666	-0.0375247	0.539335	-0.069576	0.944531	0.979518	2.988	2.671
ENSMUSG00000026361	Cdc73	2156.47	0.374445	0.230621	1.62364	0.104453	0.305994	5.218	3.703
ENSMUSG00000033849	B3galt2	1273.66	-0.89923	0.288633	-3.11548	0.00183648	0.0192483	13.744	23.325
ENSMUSG00000018196	Glrx2	646.502	0.0730256	0.24884	0.293464	0.769168	0.895278	3.863	3.364
ENSMUSG00000018199	Ro60	3808.44	0.165184	0.209289	0.789261	0.429959	0.680812	33.627	27.692
ENSMUSG00000018189	Uchl5	647.633	0.224985	0.161726	1.39114	0.164182	0.403222	4.527	3.465
ENSMUSG00000026360	Rgs2	696.1	0.462031	0.43996	1.05017	0.293642	0.557624	38.342	26.092
ENSMUSG00000051079	Rgs13	17.9775	-1.95763	0.809733	-2.41762	0.0156224	0.088369	0.055	0.199
ENSMUSG00000026358	Rgs1	18.602	2.1394	0.858326	2.49252	0.0126839	0.0767385	0.575	0.117
ENSMUSG00000100441	Gm7266	8.62011	0.203	0.720056	0.281923	0.778003	0.900534	4.548	3.54
ENSMUSG00000026357	Rgs18	3.96189	0.259928	0.916981	0.283461	0.776824	NA	0.057	0.041
ENSMUSG00000099964	Gm29514	4.25196	0.989592	1.42806	0.692964	0.488332	0.725291	0.008	0.003
ENSMUSG00000035131	Brinp3	86.85	0.501111	0.613237	0.817156	0.413839	0.666961	0.023	0.014
ENSMUSG00000087627	A230059L01Rik	4.71098	-0.852286	1.49405	-0.570453	0.568371	0.782982	0.229	0.415
ENSMUSG00000082588	Gm15443	6.53922	-0.625598	0.74879	-0.835479	0.403448	0.658216	1.666	2.246
ENSMUSG00000056220	Pla2g4a	144.958	0.264956	0.303283	0.873627	0.382321	0.64001	0.301	0.219
ENSMUSG00000097028	Ptgs2os	3.39977	-0.261087	1.21525	-0.214843	0.82989	NA	0.02	0.021
ENSMUSG00000032487	Ptgs2	87.4529	1.8679	0.702503	2.65892	0.00783907	0.0546706	2.763	0.647
ENSMUSG00000099875	Rbm3-ps	122.393	-1.60244	0.300293	-5.33626	9.48845e-08	7.27648e-06	25.191	68.652
ENSMUSG00000006007	Pdc	5812.81	-1.01151	0.673267	-1.50239	0.132998	0.3545	50.254	93.879
ENSMUSG00000099447	2310030A07Rik	30.1678	-1.45138	0.705357	-2.05765	0.0396238	0.165329	0.128	0.317
ENSMUSG00000006010	Odr4	1932.4	0.116488	0.166593	0.69924	0.484402	0.721508	13.962	11.616
ENSMUSG00000006005	Tpr	9899.32	-0.066413	0.152491	-0.43552	0.663185	0.840548	37.404	35.344
ENSMUSG00000006014	Prg4	7.84472	1.61954	1.13818	1.42292	0.154759	0.389044	0.169	0.047
ENSMUSG00000101519	Ska2l-ps	4.87149	0.0669407	0.897269	0.0746049	0.940529	0.977457	3.63	2.977
ENSMUSG00000066842	Hmcn1	131.224	-0.753112	0.362112	-2.07977	0.0375462	0.159858	0.058	0.088
ENSMUSG00000100954	Gm10138	54.4738	0.0911122	0.39688	0.229571	0.818425	0.922237	1.993	1.719
ENSMUSG00000023150	Ivns1abp	4500.43	-0.233429	0.212261	-1.09973	0.271451	0.534689	41.827	45.11
ENSMUSG00000052748	Swt1	608.724	0.185063	0.158769	1.16561	0.243772	0.505145	2.129	1.705
ENSMUSG00000053286	Trmt1l	929.813	0.429108	0.161729	2.65325	0.00797214	0.0553005	7.639	5.163
ENSMUSG00000026484	Rnf2	2497.55	-0.269277	0.148988	-1.80738	0.0707027	0.240573	11.415	12.528
ENSMUSG00000026483	Fam129a	363.872	0.151071	0.23341	0.647234	0.517481	0.748149	0.699	0.577
ENSMUSG00000100594	2810414N06Rik	46.4091	0.690729	0.375542	1.83928	0.0658733	0.229952	1.944	1.077
ENSMUSG00000043019	Edem3	2600.16	0.144051	0.13728	1.04932	0.294029	0.557823	8.642	7.032
ENSMUSG00000032666	1700025G04Rik	1136.74	-1.27918	0.401926	-3.18262	0.00145949	0.0161834	0.545	1.224
ENSMUSG00000100685	Gm28610	1.97217	-0.591619	1.2997	-0.455195	0.648969	NA	0.024	0.033
ENSMUSG00000014980	Tsen15	514.28	-0.244242	0.141537	-1.72563	0.0844134	0.269288	6.647	7.142
ENSMUSG00000032649	Colgalt2	38.2904	0.374745	0.523152	0.716321	0.473793	0.713042	0.071	0.049
ENSMUSG00000026482	Rgl1	569.895	0.674258	0.478714	1.40848	0.15899	0.395167	0.574	0.329
ENSMUSG00000055547	Apobec4	12.2839	1.89124	0.724993	2.60864	0.00909034	0.0606919	0.699	0.179
ENSMUSG00000008475	Arpc5	1594.42	-0.235839	0.121733	-1.93734	0.0527038	0.19847	33.591	35.378
ENSMUSG00000026480	Ncf2	117.628	0.813209	0.340406	2.38894	0.016897	0.0932678	0.791	0.398
ENSMUSG00000042772	Smg7	2691.71	0.178196	0.133617	1.33364	0.182323	0.426711	9.138	7.295
ENSMUSG00000042751	Nmnat2	2544.5	0.305723	0.476446	0.641675	0.521084	0.750674	3.732	2.7
ENSMUSG00000099969	Gm28960	70.9294	-0.119017	0.475112	-0.250504	0.802198	0.912525	0.675	0.661
ENSMUSG00000026479	Lamc2	65.3093	2.62974	0.556666	4.72409	2.3115e-06	0.00010454	0.42	0.064
ENSMUSG00000026478	Lamc1	1660.29	-0.35245	0.11707	-3.01059	0.00260737	0.0249695	3.22	3.678
ENSMUSG00000073538	E330020D12Rik	2.48137	0.7891	1.34279	0.587658	0.556762	NA	0.053	0.027
ENSMUSG00000042708	Shcbp1l	7.02256	-0.800614	0.8008	-0.999768	0.317423	0.581403	0.034	0.053
ENSMUSG00000042699	Dhx9	4088.41	0.0802723	0.131596	0.609988	0.54187	0.764941	28.616	24.372
ENSMUSG00000042684	Npl	113.768	-0.155216	0.369008	-0.42063	0.674025	0.846225	0.462	0.459
ENSMUSG00000099858	Gm6652	18.5941	-0.793701	0.481729	-1.64761	0.0994327	0.297439	3.182	4.888
ENSMUSG00000042671	Rgs8	387.88	0.0794355	0.561141	0.141561	0.887427	0.953264	2.241	1.782
ENSMUSG00000100334	C230024C17Rik	2.78953	-3.61934	1.80515	-2.00501	0.0449619	NA	0.004	0.051
ENSMUSG00000026475	Rgs16	100.089	0.0939787	0.365083	0.257417	0.796857	0.910003	4.738	3.921
ENSMUSG00000099568	Gm28513	1.52893	-2.11268	2.34902	-0.899389	0.368445	NA	0.011	0.053
ENSMUSG00000066800	Rnasel	129.973	0.238805	0.493302	0.484096	0.628318	0.820697	1.728	1.385
ENSMUSG00000042641	Rgsl1	7.68346	0.37957	0.820425	0.46265	0.643615	0.829425	0.028	0.02
ENSMUSG00000045968	Teddm2	44.7711	0.425839	0.411183	1.03564	0.300369	0.564854	0.142	0.097
ENSMUSG00000026473	Glul	9757.77	0.858312	0.374672	2.29084	0.0219729	0.111748	249.073	129.911
ENSMUSG00000100627	A830008E24Rik	27.9715	0.0192241	0.492628	0.0390235	0.968872	0.989095	0.096	0.09
ENSMUSG00000004110	Cacna1e	360.656	0.466035	0.626583	0.743773	0.457014	0.700725	0.041	0.026
ENSMUSG00000101880	Gm29282	4.9788	1.18885	0.87034	1.36596	0.171952	0.41326	0.031	0.013
ENSMUSG00000096950	Gm9530	32.4555	-0.53506	0.367462	-1.4561	0.145365	0.37359	0.284	0.379
ENSMUSG00000056708	Ier5	740.094	-1.11776	0.391196	-2.8573	0.00427265	0.0357781	29.823	57.495
ENSMUSG00000026471	Mr1	109.743	-0.0225678	0.298547	-0.0755921	0.939744	0.977094	1.335	1.222
ENSMUSG00000026470	Stx6	2159.91	-0.0112582	0.184052	-0.0611682	0.951225	0.982345	9.292	8.464
ENSMUSG00000033722	BC034090	5822.97	-0.419009	0.186593	-2.24557	0.0247314	0.120714	33.24	40.333
ENSMUSG00000103670	Gm37622	8.68685	0.193519	0.705865	0.274159	0.783963	0.903745	0.938	0.763
ENSMUSG00000026469	Xpr1	2386.65	0.024276	0.192639	0.126018	0.899718	0.959379	3.744	3.364
ENSMUSG00000073535	Gm5532	2.80926	-1.58529	1.5456	-1.02568	0.305044	NA	0.019	0.056
ENSMUSG00000033701	Acbd6	725.059	-0.184571	0.206034	-0.895831	0.370343	0.629545	1.158	1.169
ENSMUSG00000026468	Lhx4	6196.97	0.883512	0.466308	1.8947	0.0581328	0.212089	40.411	20.658
ENSMUSG00000033684	Qsox1	1601.31	0.0223232	0.379037	0.0588944	0.953036	0.982953	10.461	9.224
ENSMUSG00000102558	Gm37571	13.2419	0.209152	0.820022	0.255057	0.798679	0.910608	0.086	0.069
ENSMUSG00000033671	Cep350	3093.25	0.102614	0.163604	0.627211	0.530521	0.75798	5.227	4.458
ENSMUSG00000102833	Gm9694	11.3317	0.880137	0.5824	1.51122	0.130731	0.350487	2.572	1.288
ENSMUSG00000026466	Tor1aip1	943.362	0.302553	0.206579	1.46459	0.143033	0.370462	6.852	5.121
ENSMUSG00000050565	Tor1aip2	1814.14	0.241318	0.177202	1.36182	0.173254	0.414814	11.995	9.289
ENSMUSG00000015484	Fam163a	37.0098	-0.251417	0.587964	-0.427606	0.668938	0.843432	0.047	0.05
ENSMUSG00000060985	Tdrd5	13.5543	0.652379	0.707564	0.922007	0.356525	0.617671	0.051	0.029
ENSMUSG00000103705	4930518J20Rik	3.49367	5.04541	1.68679	2.99114	0.00277938	NA	0.891	0
ENSMUSG00000026602	Nphs2	1.68234	-0.134432	2.0005	-0.0671989	0.946423	NA	0.02	0.021
ENSMUSG00000026601	Axdnd1	6.29885	0.319038	0.762184	0.418583	0.675521	0.846999	0.016	0.012
ENSMUSG00000078193	Gm2000	268.517	-0.0464414	0.370734	-0.125269	0.900311	0.959771	128.546	114.624
ENSMUSG00000026600	Soat1	532.542	0.640996	0.213227	3.00617	0.00264561	0.0252113	2.374	1.366
ENSMUSG00000101523	Csnk2a3	804.553	0.104029	0.143944	0.722707	0.46986	0.710361	71.025	58.852
ENSMUSG00000026596	Abl2	2011.08	0.233384	0.142537	1.63736	0.101555	0.301306	4.527	3.494
ENSMUSG00000060519	Tor3a	155.236	0.325822	0.234699	1.38825	0.16506	0.404003	1.571	1.133
ENSMUSG00000033557	Fam20b	2523.13	0.126529	0.13197	0.958771	0.337674	0.600038	13.56	11.265
ENSMUSG00000046057	Gm15428	1.66995	-0.694642	1.66233	-0.417872	0.676041	NA	0.885	1.186
ENSMUSG00000026594	Ralgps2	3205.57	-0.380334	0.232988	-1.63242	0.102591	0.302889	4.734	5.606
ENSMUSG00000033544	Angptl1	12.3079	-1.26383	0.730201	-1.7308	0.0834866	0.267914	0.069	0.149
ENSMUSG00000101905	4930439D14Rik	9.041	-0.59981	0.727192	-0.82483	0.409468	0.663202	3.958	5.328
ENSMUSG00000101768	Gm28694	5.8375	-0.0676169	0.872925	-0.0774602	0.938257	0.976404	0.019	0.017
ENSMUSG00000026592	Tex35	2.69456	0.602261	1.115	0.540146	0.589096	NA	0.087	0.053
ENSMUSG00000070565	Rasal2	1838.03	0.734618	0.262514	2.79839	0.00513574	0.0403742	1.694	0.942
ENSMUSG00000049881	2810025M15Rik	811.07	-0.0660898	0.241738	-0.273394	0.78455	0.903745	23.668	22.287
ENSMUSG00000033488	Cryzl2	104.413	-0.989154	0.331352	-2.98521	0.00283388	0.0262951	0.45	0.833
ENSMUSG00000026589	Sec16b	6.81972	0.353626	0.843921	0.419027	0.675196	0.84681	0.023	0.016
ENSMUSG00000004031	Brinp2	125.665	-0.172028	0.779777	-0.220611	0.825395	0.925148	0.067	0.068
ENSMUSG00000026587	Astn1	336.263	0.329718	0.703951	0.468382	0.639511	0.828678	0.112	0.082
ENSMUSG00000103971	Gm37679	2.20461	0.813703	1.52322	0.534198	0.593204	NA	0.007	0.004
ENSMUSG00000073530	Pappa2	24.5983	0.499016	1.04813	0.4761	0.634003	0.824816	0.025	0.014
ENSMUSG00000040782	Cop1	2038.84	-0.106379	0.132643	-0.801992	0.422558	0.674882	3.382	3.304
ENSMUSG00000015829	Tnr	339.066	1.56351	0.621098	2.51733	0.0118247	0.0730603	0.121	0.035
ENSMUSG00000090394	4930523C07Rik	32.5706	-0.097854	0.382882	-0.255573	0.798281	0.910528	0.189	0.181
ENSMUSG00000026725	Tnn	18.8616	1.74264	1.36206	1.27942	0.200749	0.450803	0.115	0.027
ENSMUSG00000058267	Mrps14	945.17	0.201561	0.13275	1.51835	0.128927	0.347181	30.739	24.064
ENSMUSG00000014226	Cacybp	2415.21	-0.0722805	0.113305	-0.637927	0.523521	0.752787	46.069	43.925
ENSMUSG00000103006	4933417C20Rik	34.5635	-0.962038	0.429114	-2.24192	0.0249666	0.121526	2.098	3.8
ENSMUSG00000026721	Rabgap1l	1179.95	0.387964	0.414586	0.935787	0.349383	0.610875	0.465	0.329
ENSMUSG00000104302	Gm36975	2.29666	1.33629	1.39451	0.958251	0.337936	NA	0.003	0.001
ENSMUSG00000040423	Rc3h1	2329.77	-0.0595238	0.138876	-0.428611	0.668207	0.842923	7.007	6.646
ENSMUSG00000026715	Serpinc1	10.9058	-0.246933	0.612257	-0.403315	0.686716	0.853808	0.071	0.074
ENSMUSG00000043467	Zbtb37	1550.65	-0.183879	0.164483	-1.11792	0.263601	0.526334	10.343	10.726
ENSMUSG00000053332	Gas5	1372.19	-0.19234	0.210119	-0.915385	0.359989	0.621177	68.096	70.621
ENSMUSG00000026709	Dars2	958.646	0.138326	0.282502	0.489644	0.624386	0.818451	6.631	5.307
ENSMUSG00000102864	Gm37634	5.0306	-1.95207	0.988848	-1.97409	0.0483717	0.187852	0.42	1.565
ENSMUSG00000026708	Cenpl	284.947	-1.15866	0.32283	-3.58908	0.000331844	0.00519436	2.368	4.68
ENSMUSG00000026705	Klhl20	500.835	-0.260798	0.142271	-1.8331	0.0667874	0.231638	2.145	2.303
ENSMUSG00000044835	Ankrd45	92.554	0.507666	0.63532	0.799071	0.424249	0.676455	0.312	0.203
ENSMUSG00000102817	Gm6185	2.43721	-1.45775	1.71064	-0.852168	0.394121	NA	0.002	0.006
ENSMUSG00000026701	Prdx6	1143.11	1.00339	0.288979	3.47221	0.000516199	0.00728916	20.243	9.401
ENSMUSG00000066755	Tnfsf18	2.53321	-2.68445	1.5704	-1.70941	0.0873757	NA	0.013	0.077
ENSMUSG00000040323	Gm15429	30.6906	0.0572834	0.399387	0.143428	0.885952	0.95284	5.498	4.653
ENSMUSG00000000817	Fasl	2.89289	0.118963	1.17352	0.101373	0.919254	NA	0.078	0.068
ENSMUSG00000103625	Gm37357	3.10156	-0.127908	1.15768	-0.110486	0.912024	NA	0.193	0.207
ENSMUSG00000040297	Suco	2414.37	0.17258	0.224826	0.767617	0.442715	0.689779	8.836	7.169
ENSMUSG00000086277	4930558K02Rik	1.846	-0.731889	1.83416	-0.399033	0.689869	NA	0.008	0.012
ENSMUSG00000103393	Gm38304	15.4727	0.331082	0.52772	0.627381	0.530409	0.75798	0.063	0.046
ENSMUSG00000040265	Dnm3	464.16	-0.111925	0.568272	-0.196956	0.843862	0.933499	0.172	0.168
ENSMUSG00000078190	Dnm3os	3.81821	-0.0772472	1.49509	-0.0516673	0.958794	NA	0.126	0.123
ENSMUSG00000026694	Eef1aknmt	400.588	-0.326319	0.188654	-1.72972	0.0836807	0.268137	4.582	5.146
ENSMUSG00000026696	Vamp4	795.982	-0.0316171	0.27487	-0.115026	0.908425	0.963757	5.649	5.32
ENSMUSG00000026697	Myoc	51.9526	4.24663	1.18658	3.57889	0.000345052	0.00532851	2.568	0.128
ENSMUSG00000040225	Prrc2c	5595.47	0.157116	0.140703	1.11665	0.264146	0.526879	18.211	14.845
ENSMUSG00000026692	Fmo4	1.36725	-0.0510645	1.87111	-0.0272911	0.978228	NA	0.017	0.016
ENSMUSG00000040181	Fmo1	122.901	-0.0346484	0.344238	-0.100652	0.919826	0.969234	0.925	0.876
ENSMUSG00000040170	Fmo2	19.7009	0.90746	0.714291	1.27043	0.20393	0.454735	0.189	0.097
ENSMUSG00000026586	Prrx1	207.546	-0.393362	0.347698	-1.13133	0.257915	0.519992	0.714	0.82
ENSMUSG00000040124	Gorab	530.663	-0.366595	0.135006	-2.7154	0.00661963	0.0488154	5.293	6.173
ENSMUSG00000102117	Rpsa-ps1	6.01527	-1.35632	0.94071	-1.44181	0.149357	0.380343	0.875	2.009
ENSMUSG00000040113	Mettl11b	1.76845	1.37225	2.3479	0.584461	0.55891	NA	0.015	0.006
ENSMUSG00000026585	Kifap3	3308.39	-0.0203462	0.184486	-0.110286	0.912183	0.965371	4.991	4.623
ENSMUSG00000026584	Scyl3	525.424	-0.0980961	0.157648	-0.622248	0.533779	0.759599	3.821	3.71
ENSMUSG00000041406	BC055324	944.366	-0.666185	0.297284	-2.2409	0.0250323	0.121662	3.195	4.518
ENSMUSG00000041396	Mettl18	156.948	0.00673882	0.207665	0.0324505	0.974113	0.991332	14.402	13.051
ENSMUSG00000026582	Sele	7.60513	1.3408	0.859788	1.55945	0.118889	0.330944	0.319	0.112
ENSMUSG00000026581	Sell	10.0965	0.891661	0.874371	1.01977	0.307836	0.572524	0.158	0.075
ENSMUSG00000026580	Selp	11.8347	0.505136	0.639841	0.789471	0.429837	0.680681	0.098	0.063
ENSMUSG00000090081	Gm16587	1.81684	0.739287	1.5146	0.488107	0.625474	NA	0.245	0.13
ENSMUSG00000086593	Gm16548	2.0221	2.15746	1.84235	1.17103	0.241585	NA	0.263	0.055
ENSMUSG00000026579	F5	269.831	0.949902	0.80674	1.17746	0.239013	0.500089	1.413	0.688
ENSMUSG00000040918	Slc19a2	497.508	0.172309	0.277974	0.619876	0.535339	0.760592	7.7	6.363
ENSMUSG00000026578	Ccdc181	904.275	0.104261	0.224773	0.463848	0.642757	0.829289	17.222	14.746
ENSMUSG00000026577	Blzf1	1072.63	-0.0633251	0.13731	-0.461184	0.644667	0.830037	12.206	11.414
ENSMUSG00000026575	Nme7	743.3	-0.221842	0.159246	-1.39307	0.163598	0.402094	1.095	1.161
ENSMUSG00000026576	Atp1b1	2095.17	-0.0410474	0.334616	-0.12267	0.902368	0.960879	9.846	8.976
ENSMUSG00000104011	Gm32391	2.34054	0.914231	1.31741	0.693963	0.487705	NA	0.362	0.174
ENSMUSG00000102761	Gm37184	1.32006	-0.613025	1.83103	-0.334798	0.737777	NA	0.009	0.013
ENSMUSG00000026574	Dpt	2.20278	1.48964	1.53856	0.968203	0.332943	NA	0.028	0.009
ENSMUSG00000103659	Gm32569	8.20329	-0.0145198	0.727768	-0.0199512	0.984082	0.994902	0.018	0.017
ENSMUSG00000104117	Gm20743	41.256	0.246644	0.630747	0.391034	0.695772	0.858776	0.13	0.102
ENSMUSG00000026573	Xcl1	2.10314	1.05552	1.43581	0.735142	0.462253	NA	0.222	0.095
ENSMUSG00000040848	Sft2d2	674.516	0.213507	0.241405	0.884434	0.376462	0.635051	8.119	6.485
ENSMUSG00000040843	Tiprl	1045.31	-0.153202	0.132485	-1.15638	0.247528	0.509025	8.33	8.403
ENSMUSG00000040836	Gpr161	77.4541	-0.198098	0.477576	-0.414798	0.67829	0.848387	0.442	0.464
ENSMUSG00000026571	Dcaf6	1278.23	0.0811787	0.190948	0.425135	0.670738	0.844878	2.085	1.809
ENSMUSG00000026568	Mpc2	1171.13	0.131403	0.166809	0.787747	0.430845	0.681502	12.503	10.35
ENSMUSG00000026567	Adcy10	10.4614	0.0401753	0.653937	0.061436	0.951012	0.982345	0.025	0.022
ENSMUSG00000026566	Mpzl1	299.119	-0.979149	0.197454	-4.95886	7.09093e-07	3.8005e-05	0.963	1.704
ENSMUSG00000040723	Rcsd1	154.099	0.352703	0.355616	0.991811	0.32129	0.585101	0.683	0.494
ENSMUSG00000040713	Creg1	516.39	0.340611	0.283606	1.201	0.229751	0.48787	11.019	7.877
ENSMUSG00000089829	Gm16565	6.9013	-0.0171592	1.02635	-0.0167186	0.986661	0.995926	0.188	0.183
ENSMUSG00000005763	Cd247	56.7601	-1.17786	0.527382	-2.23341	0.0255217	0.123361	0.099	0.21
ENSMUSG00000103768	Gm37856	1.95534	-2.89084	1.91	-1.51353	0.130145	NA	0.131	0.931
ENSMUSG00000026565	Pou2f1	3086.69	-0.195379	0.18574	-1.05189	0.292848	0.557042	4.984	5.209
ENSMUSG00000097196	Gm26665	14.1237	-0.73875	0.653572	-1.13033	0.258339	0.520364	0.074	0.114
ENSMUSG00000026564	Dusp27	6.97453	-1.31763	1.07829	-1.22196	0.221722	0.478016	0.032	0.066
ENSMUSG00000040612	Ildr2	799.064	0.0984367	0.548141	0.179583	0.85748	0.940572	2.819	2.452
ENSMUSG00000103400	Gm15853	13.6721	0.0218207	0.595288	0.0366557	0.97076	0.9901	1.062	0.919
ENSMUSG00000026563	Tada1	1221.03	-0.0738209	0.146752	-0.503033	0.614941	0.812744	17.68	16.931
ENSMUSG00000040596	Pogk	3226.86	-0.422001	0.147369	-2.86358	0.00418888	0.0352443	22.879	27.998
ENSMUSG00000084093	Gm16418	89.1339	0.130195	0.261385	0.498097	0.618416	0.814413	128.498	104.606
ENSMUSG00000103073	Gm37904	16.7104	1.14208	0.908278	1.25742	0.208603	0.460813	11.488	4.624
ENSMUSG00000086925	Gm6286	21.356	0.263226	0.551219	0.477534	0.632982	0.82419	7.122	5.079
ENSMUSG00000102548	Gm16701	8.74526	-0.0224266	0.896589	-0.0250132	0.980044	0.993623	0.04	0.039
ENSMUSG00000097823	Gm16701	21.1503	0.5523	0.477717	1.15612	0.247631	0.509063	1.799	1.137
ENSMUSG00000060568	Fam78b	879.348	0.661651	0.344967	1.91801	0.0551093	0.204247	1.449	0.842
ENSMUSG00000026558	Uck2	2151.42	-0.167639	0.301165	-0.556635	0.577777	0.788772	6.303	6.184
ENSMUSG00000103139	Gm37982	7.36984	-0.133539	1.13187	-0.117981	0.906083	0.962573	0.124	0.12
ENSMUSG00000102909	Gm2453	5.77712	-1.29456	0.884874	-1.46299	0.143471	0.370822	0.15	0.323
ENSMUSG00000052428	Tmco1	1542.6	-0.0289319	0.139599	-0.20725	0.835815	0.930112	12.552	11.529
ENSMUSG00000026687	Aldh9a1	544.883	0.460885	0.242413	1.90124	0.0572706	0.209891	7.475	5.005
ENSMUSG00000026688	Mgst3	810.743	0.56629	0.320753	1.7655	0.0774799	0.255137	9.808	6.173
ENSMUSG00000040485	Lrrc52	7.53776	0.231246	0.825258	0.280211	0.779316	0.901143	0.1	0.082
ENSMUSG00000015843	Rxrg	5204.46	-0.274483	0.406983	-0.674434	0.500035	0.733286	28.652	33.015
ENSMUSG00000026686	Lmx1a	290.202	2.11366	0.791299	2.67113	0.00755973	0.0535502	0.984	0.18
ENSMUSG00000093538	Gm20711	1.54632	2.60874	2.04213	1.27746	0.201441	NA	0.004	0.001
ENSMUSG00000052534	Pbx1	3079.39	0.258093	0.222541	1.15975	0.246149	0.507846	2.281	1.756
ENSMUSG00000026683	Nuf2	1399.85	-0.803483	0.332918	-2.41345	0.0158021	0.0889965	6.187	9.461
ENSMUSG00000026678	Rgs5	3074.35	0.920946	0.500298	1.8408	0.0656515	0.229624	21.038	9.334
ENSMUSG00000038530	Rgs4	435.854	0.513576	0.63833	0.804562	0.421073	0.673482	3.678	2.194
ENSMUSG00000070532	Ccdc190	50.2847	0.307467	0.513348	0.598945	0.54921	0.770211	1.42	1.064
ENSMUSG00000026675	Hsd17b7	588.91	-0.0840507	0.165265	-0.50858	0.611046	0.809969	6.575	6.33
ENSMUSG00000097503	3110045C21Rik	21.3916	-0.634363	0.514775	-1.23231	0.217832	0.472539	1.165	1.598
ENSMUSG00000026674	Ddr2	358.007	-0.0731191	0.336773	-0.217117	0.828117	0.926837	0.695	0.658
ENSMUSG00000026670	Uap1	1543.61	0.0265848	0.125936	0.211097	0.832811	0.928896	9.837	8.671
ENSMUSG00000104266	Gm37748	24.677	-0.299304	0.489344	-0.611642	0.540774	0.764174	3.396	3.812
ENSMUSG00000026667	Uhmk1	3304	0.843365	0.231697	3.63995	0.000272691	0.00453752	39.231	19.835
ENSMUSG00000044306	4930500M09Rik	2.84431	-0.526024	1.29515	-0.40615	0.684633	NA	0.214	0.299
ENSMUSG00000096964	Gm6345	6.80418	-0.333178	0.722924	-0.460875	0.644888	0.830186	0.741	0.856
ENSMUSG00000102418	Sh2d1b1	21.3876	4.06787	0.904174	4.49899	6.82774e-06	0.00024623	0.803	0.04
ENSMUSG00000102752	Gm7694	19.8197	0.472877	0.459734	1.02859	0.303673	0.568713	0.763	0.499
ENSMUSG00000038473	Nos1ap	262.086	0.201904	0.533869	0.37819	0.705289	0.86452	0.127	0.1
ENSMUSG00000102193	Gm7299	1.36712	-1.90013	1.65111	-1.15082	0.249806	NA	0.25	0.813
ENSMUSG00000038463	Olfml2b	78.322	0.919799	0.614769	1.49617	0.134609	0.357494	0.524	0.229
ENSMUSG00000026663	Atf6	2596.58	0.141332	0.10562	1.33812	0.180858	0.42496	3.512	2.868
ENSMUSG00000053925	Gm9929	45.2076	-0.974602	0.347418	-2.80528	0.00502736	0.0398126	0.471	0.849
ENSMUSG00000026659	Dusp12	248.951	0.102295	0.158697	0.644594	0.51919	0.749671	4.287	3.611
ENSMUSG00000096968	Gm26620	2.76566	-0.467369	1.22205	-0.382446	0.70213	NA	0.592	0.76
ENSMUSG00000070524	Fcrlb	1.39081	3.56773	2.1313	1.67397	0.094137	NA	0.089	0
ENSMUSG00000038421	Fcrla	6.94987	0.890904	1.23692	0.720258	0.471366	0.711205	0.085	0.041
ENSMUSG00000026656	Fcgr2b	117.793	1.17335	0.312446	3.75537	0.000173086	0.00314735	1.671	0.649
ENSMUSG00000059089	Fcgr4	157.001	3.66109	0.824584	4.43992	8.99919e-06	0.000307209	5.22	0.33
ENSMUSG00000059498	Fcgr3	256.975	0.577382	0.260221	2.21881	0.0264995	0.126792	3.587	2.136
ENSMUSG00000026649	Cfap126	123.882	1.18387	0.439945	2.69096	0.00712474	0.0513119	2.894	1.162
ENSMUSG00000058076	Sdhc	2975.73	0.0650876	0.234265	0.277837	0.781137	0.902121	27.481	23.904
ENSMUSG00000056569	Mpz	21.1466	1.61094	0.629742	2.55809	0.0105248	0.0670177	0.881	0.264
ENSMUSG00000038370	Pcp4l1	350.775	-0.479189	0.461442	-1.03846	0.299056	0.563968	2.889	3.748
ENSMUSG00000005677	Nr1i3	3.39429	-0.250676	1.12746	-0.222338	0.824051	NA	0.073	0.077
ENSMUSG00000005674	Tomm40l	757.196	0.635529	0.171055	3.71534	0.000202931	0.00359897	25.785	14.822
ENSMUSG00000005681	Apoa2	11.5369	0.637944	0.817561	0.780301	0.435214	0.684844	2.096	1.191
ENSMUSG00000058715	Fcer1g	186.743	1.74807	0.410626	4.25708	2.07114e-05	0.000582382	10.359	2.658
ENSMUSG00000013593	Ndufs2	5432.47	-0.331987	0.161712	-2.05295	0.0400773	0.166576	61.459	69.666
ENSMUSG00000006403	Adamts4	116.762	0.738384	0.478094	1.54443	0.122484	0.336795	3.048	1.534
ENSMUSG00000052423	B4galt3	744.834	-0.087026	0.141749	-0.613943	0.539253	0.763245	22.348	21.496
ENSMUSG00000062729	Ppox	387.96	-0.316924	0.145597	-2.17672	0.0295011	0.136411	13.41	15.164
ENSMUSG00000053483	Usp21	784.757	0.205831	0.191062	1.0773	0.281346	0.544797	29.418	23.354
ENSMUSG00000062963	Ufc1	1511.07	0.0246286	0.175413	0.140404	0.888341	0.953613	49.774	44.224
ENSMUSG00000079137	Rpl27-ps1	3.62477	0.345435	1.1816	0.292345	0.770023	NA	1.533	1.086
ENSMUSG00000103983	Gm20045	38.3893	-0.684159	0.395653	-1.72919	0.0837749	0.268235	0.963	1.391
ENSMUSG00000013973	Dedd	648.85	0.105669	0.204362	0.51707	0.605108	0.806643	10.622	9.046
ENSMUSG00000013997	Nit1	742.931	-0.018619	0.156189	-0.119208	0.905111	0.962033	19.501	17.704
ENSMUSG00000006412	Pfdn2	514.749	5.6985e-05	0.156358	0.000364453	0.999709	1	7.176	6.467
ENSMUSG00000045259	Klhdc9	29.2504	-1.17065	0.572661	-2.04424	0.0409302	0.168999	1.956	3.982
ENSMUSG00000006411	Nectin4	34.0332	0.686917	0.471625	1.45649	0.145257	0.373526	0.316	0.175
ENSMUSG00000048865	Arhgap30	120.699	1.54481	0.372589	4.14615	3.3811e-05	0.000857517	1.656	0.492
ENSMUSG00000026641	Usf1	1070.12	0.113177	0.136821	0.827186	0.408132	0.662143	26.871	22.368
ENSMUSG00000103711	Tstd1	8.69537	0.496034	0.649822	0.763339	0.445261	0.691932	1.317	0.857
ENSMUSG00000038235	F11r	148.455	0.000281794	0.308959	0.000912075	0.999272	1	1.066	0.954
ENSMUSG00000091993	B930036N10Rik	62.6531	-1.2137	0.426852	-2.84338	0.00446375	0.036744	1.739	3.645
ENSMUSG00000060244	Alyref2	100.561	0.80161	0.296649	2.70222	0.00688782	0.0502157	18.205	9.366
ENSMUSG00000004709	Cd244a	27.5711	3.44478	0.776007	4.43911	9.03307e-06	0.000307473	0.185	0.014
ENSMUSG00000004707	Ly9	39.6224	2.12735	0.427255	4.9791	6.38794e-07	3.51378e-05	0.516	0.107
ENSMUSG00000038179	Slamf7	64.0682	3.67789	0.642792	5.72174	1.0544e-08	1.169e-06	1.053	0.075
ENSMUSG00000015355	Cd48	41.3334	1.55286	0.436384	3.55846	0.000373029	0.00565873	0.481	0.143
ENSMUSG00000059058	Tma7-ps	454.186	-0.694285	0.413613	-1.67858	0.093233	0.286446	450.83	696.087
ENSMUSG00000015316	Slamf1	1.83711	-0.0369668	1.96054	-0.0188554	0.984956	NA	0.009	0.007
ENSMUSG00000038147	Cd84	124.426	1.06685	0.399962	2.66739	0.00764431	0.0538543	0.609	0.267
ENSMUSG00000104413	Gm37065	1.15004	-0.0815015	1.96524	-0.0414715	0.96692	NA	0.014	0.015
ENSMUSG00000015314	Slamf6	7.98918	1.09625	0.858613	1.27677	0.201684	0.451934	0.048	0.02
ENSMUSG00000026556	Vangl2	304.868	-0.449122	0.412479	-1.08884	0.276226	0.53994	1.569	1.907
ENSMUSG00000051251	Nhlh1	17.0059	-0.914026	0.639691	-1.42886	0.153046	0.386496	0.493	0.848
ENSMUSG00000003458	Ncstn	1223.49	-0.375723	0.143334	-2.62131	0.00875933	0.0589967	13.591	15.925
ENSMUSG00000026553	Copa	11035.5	0.0512707	0.14203	0.360985	0.718111	0.871529	62.281	54.393
ENSMUSG00000003464	Pex19	2720.88	-0.428851	0.161212	-2.66017	0.00781003	0.0545588	52.181	63.543
ENSMUSG00000089803	Gm10171	19.2049	0.451997	0.555141	0.814203	0.415529	0.66872	8.285	5.177
ENSMUSG00000026554	Dcaf8	4885.18	0.0673878	0.216775	0.310865	0.755903	0.888848	21.483	18.906
ENSMUSG00000013698	Pea15a	10176.2	0.0977028	0.214411	0.455679	0.648621	0.831908	230.911	199.037
ENSMUSG00000007122	Casq1	45.1616	-1.31263	0.330734	-3.96885	7.22198e-05	0.0015569	0.624	1.412
ENSMUSG00000092085	Gm17224	4.31759	1.03294	0.89042	1.16006	0.246025	0.507721	2.21	0.998
ENSMUSG00000038034	Igsf8	1826.01	-0.961922	0.232924	-4.12976	3.63144e-05	0.000909716	4.577	7.968
ENSMUSG00000007097	Atp1a2	2579.56	1.06636	0.412616	2.58438	0.00975538	0.0637071	19.555	8.395
ENSMUSG00000038026	Kcnj9	114.527	2.63323	1.00153	2.6292	0.00855861	0.0581219	0.804	0.106
ENSMUSG00000044708	Kcnj10	282.372	1.76391	0.592926	2.97492	0.00293069	0.0269357	1.29	0.348
ENSMUSG00000050229	Pigm	948.635	-0.120859	0.159497	-0.757753	0.448599	0.693855	24.372	23.627
ENSMUSG00000102278	Gm37145	1.27961	-1.35729	2.23664	-0.606844	0.543955	NA	0.024	0.065
ENSMUSG00000026548	Slamf9	47.351	3.64406	0.615026	5.92504	3.12218e-09	4.2067e-07	5.385	0.374
ENSMUSG00000037995	Igsf9	322.708	1.04254	0.390681	2.66853	0.00761839	0.0538477	2.405	1.066
ENSMUSG00000026547	Tagln2	498.66	0.203266	0.486254	0.418024	0.675929	0.8472	12.613	9.716
ENSMUSG00000104351	Gm37125	1.66373	0.994504	1.68855	0.58897	0.555881	NA	0.177	0.081
ENSMUSG00000026546	Cfap45	43.3253	-0.550107	0.792961	-0.693738	0.487847	0.724692	0.303	0.401
ENSMUSG00000085184	4933439K11Rik	8.78249	0.153127	1.25135	0.12237	0.902606	0.960907	0.049	0.041
ENSMUSG00000049598	Vsig8	29.0386	1.85553	1.22086	1.51986	NA	NA	0.148	0.036
ENSMUSG00000053318	Slamf8	19.3636	3.10315	0.860855	3.60473	0.000312479	0.00498988	0.501	0.051
ENSMUSG00000026544	Dusp23	112.765	0.268032	0.573785	0.46713	0.640407	0.828779	9.999	7.224
ENSMUSG00000060128	Gm2710	1.42857	-0.0669115	1.61026	-0.0415533	0.966855	NA	0.608	0.545
ENSMUSG00000037942	Crp	152.011	1.23686	1.24794	0.991126	0.321624	0.58538	0.203	0.083
ENSMUSG00000102701	9430083B18Rik	11.5163	1.58859	1.17139	1.35616	0.175049	0.417134	2.225	0.672
ENSMUSG00000037924	Olfr16	2.94805	1.03927	1.63941	0.633929	0.526127	NA	0.07	0.032
ENSMUSG00000037872	Ackr1	357.39	1.08822	0.399216	2.72588	0.00641301	0.0477256	64.966	29.02
ENSMUSG00000005338	Cadm3	9113.79	0.387698	0.373396	1.0383	0.29913	0.563968	68.813	49.104
ENSMUSG00000037860	Aim2	148.186	0.31427	0.6246	0.503154	0.614856	0.812687	0.227	0.176
ENSMUSG00000037849	Ifi206	12.8686	4.17529	1.07849	3.87144	0.000108195	0.0021844	0.177	0.008
ENSMUSG00000070501	Ifi214	2.96114	2.37985	1.43364	1.66001	0.0969124	NA	0.072	0.011
ENSMUSG00000073491	Ifi213	26.3715	2.14585	0.717497	2.99074	0.00278303	0.0259543	0.188	0.038
ENSMUSG00000043263	Ifi209	61.8043	2.2663	0.587202	3.8595	0.000113621	0.00227499	1	0.186
ENSMUSG00000066677	Ifi208	13.7351	2.98334	0.739734	4.03299	5.50716e-05	0.00125264	0.188	0.021
ENSMUSG00000073490	Ifi207	48.9228	1.98168	0.425008	4.66267	3.12127e-06	0.000132225	0.861	0.196
ENSMUSG00000073489	Ifi204	102.936	2.12079	0.579976	3.65668	0.000255498	0.00431059	1.25	0.258
ENSMUSG00000090222	Ifi203-ps	2.91676	-0.320073	1.19945	-0.266851	0.789584	NA	0.02	0.022
ENSMUSG00000090272	Mndal	51.3472	1.58609	0.649058	2.44368	0.0145384	0.0842862	0.543	0.166
ENSMUSG00000026536	Ifi211	21.5441	2.2294	0.632596	3.52421	0.000424755	0.00625273	0.318	0.06
ENSMUSG00000039997	Ifi203	51.502	1.54089	0.516244	2.9848	0.0028376	0.026317	0.799	0.243
ENSMUSG00000026535	Ifi202b	4.59729	-0.344824	1.02741	-0.335623	0.737155	0.881383	0.062	0.071
ENSMUSG00000054203	Ifi205	13.8006	1.39902	1.12497	1.24361	0.213643	0.466948	0.188	0.064
ENSMUSG00000026532	Spta1	35.3193	-2.67557	0.732983	-3.65025	0.000261984	0.00438569	0.04	0.235
ENSMUSG00000028354	Fmn2	257.314	-0.465102	0.359383	-1.29417	0.195608	0.444714	0.095	0.118
ENSMUSG00000050069	Grem2	40.2618	-0.448343	0.809883	-0.55359	0.579859	0.790169	0.021	0.025
ENSMUSG00000026527	Rgs7	875.262	0.663528	0.313503	2.1165	0.0343023	0.151086	0.486	0.285
ENSMUSG00000026526	Fh1	2132.59	-0.0966912	0.181906	-0.531545	0.595041	0.800372	18.084	17.202
ENSMUSG00000039783	Kmo	14.804	1.13526	0.627834	1.80822	0.0705727	0.24048	0.104	0.043
ENSMUSG00000026525	Opn3	41.043	-0.792486	0.350827	-2.25891	0.0238892	0.118137	0.25	0.386
ENSMUSG00000039748	Exo1	1099.56	-0.694648	0.429483	-1.61741	0.10579	0.308468	5.398	7.571
ENSMUSG00000055214	Pld5	41.5066	0.876498	0.360275	2.43286	0.0149801	0.0861423	0.046	0.023
ENSMUSG00000057335	Cep170	2217.8	-0.121219	0.199401	-0.607913	0.543245	0.766214	5.249	5.137
ENSMUSG00000103435	Gm36992	1.64638	1.26639	1.53989	0.82239	0.410855	NA	0.109	0.042
ENSMUSG00000026504	Sdccag8	833.567	0.0124268	0.190226	0.0653264	0.947914	0.980985	0.738	0.669
ENSMUSG00000087082	Gm15423	6.78015	-0.0724032	1.54689	-0.0468056	0.962668	0.987418	0.06	0.058
ENSMUSG00000019699	Akt3	6154.12	-0.222864	0.152595	-1.4605	0.144153	0.371675	4.631	4.947
ENSMUSG00000097892	Gm26801	119.41	-0.348625	0.37373	-0.932824	0.350911	0.612131	1.608	1.861
ENSMUSG00000063659	Zbtb18	4154.88	-0.139091	0.203478	-0.683567	0.494248	0.729455	101.841	102.501
ENSMUSG00000015962	1700016C15Rik	1.5988	-0.403835	1.83386	-0.220211	0.825707	NA	0.015	0.017
ENSMUSG00000015961	Adss	1582.18	-0.134115	0.209427	-0.64039	0.521919	0.751517	9.641	9.583
ENSMUSG00000102483	Catspere1	21.1168	-3.13854	1.13358	-2.76871	0.00562791	0.0432058	0.008	0.067
ENSMUSG00000091476	Catspere2	796.829	0.704018	0.342908	2.05308	0.0400646	0.166576	1.268	0.72
ENSMUSG00000104097	Gm37313	1.85521	-0.839556	1.32109	-0.635503	0.5251	NA	0.032	0.049
ENSMUSG00000026502	Desi2	1717.2	-0.119759	0.155497	-0.770169	0.441199	0.688447	4.991	4.937
ENSMUSG00000070489	4930527J03Rik	1.35436	-1.41619	1.79401	-0.789403	0.429877	NA	0.244	0.564
ENSMUSG00000104126	Gm37486	146.247	-0.706215	0.272429	-2.59229	0.00953398	0.062582	64.303	92.923
ENSMUSG00000086350	B230369F24Rik	389.403	0.459851	0.19893	2.31162	0.0207986	0.107839	18.497	12.334
ENSMUSG00000026500	Cox20	495.814	-0.209378	0.274695	-0.762222	0.445928	0.691985	30.441	32.79
ENSMUSG00000039630	Hnrnpu	18242	-0.247898	0.144244	-1.7186	0.0856865	0.271427	213.523	226.468
ENSMUSG00000104279	Gm38300	20.6377	1.19718	0.536226	2.2326	0.0255751	0.123496	3.684	1.485
ENSMUSG00000026495	Efcab2	343.995	0.048867	0.302059	0.16178	0.871479	0.94683	1.033	0.929
ENSMUSG00000026494	Kif26b	1633.53	-0.627596	0.443176	-1.41613	0.156737	0.392135	0.653	0.864
ENSMUSG00000089713	Gm16564	2.4791	-0.278099	1.27131	-0.21875	0.826844	NA	0.026	0.028
ENSMUSG00000055067	Smyd3	1250.41	0.0566461	0.300352	0.188599	0.850407	0.936977	0.495	0.447
ENSMUSG00000096474	Gm5561	33.4424	-0.0429541	0.511779	-0.0839308	0.933111	0.974701	13.874	12.191
ENSMUSG00000026492	Tfb2m	438.479	0.182133	0.227032	0.802237	0.422416	0.674772	5.025	4.055
ENSMUSG00000038949	Cnst	2298.88	0.167277	0.215569	0.77598	0.437761	0.686394	6.282	5.094
ENSMUSG00000038936	Sccpdh	1546.62	0.252507	0.193617	1.30416	0.192181	0.440535	16.745	12.909
ENSMUSG00000087236	Kif28	22.6854	0.615614	0.65055	0.946297	0.343997	0.605867	0.073	0.045
ENSMUSG00000026491	Ahctf1	3803.91	0.0511323	0.111969	0.456666	0.647911	0.831581	13.467	11.783
ENSMUSG00000073486	Gm10518	8.42597	-0.230526	0.712823	-0.323398	0.746394	0.885781	1.197	1.272
ENSMUSG00000104418	Gm37070	4.88695	-0.935998	1.32401	-0.706944	0.479601	0.717748	1.454	2.265
ENSMUSG00000026490	Cdc42bpa	3950.57	0.00344681	0.178065	0.0193571	0.984556	0.995174	4.046	3.681
ENSMUSG00000026489	Coq8a	634.127	-0.126825	0.300569	-0.421949	0.673062	0.845904	3.947	4.032
ENSMUSG00000010609	Psen2	285.787	0.345602	0.21509	1.60678	0.108102	0.312662	1.78	1.27
ENSMUSG00000102923	Gm31728	17.7029	0.563895	0.602293	0.936247	0.349146	0.61067	0.184	0.114
ENSMUSG00000055676	Gm5069	203.666	1.15374	0.385083	2.99609	0.00273464	0.0256933	16.957	7.246
ENSMUSG00000038855	Itpkb	1423.49	0.874045	0.370661	2.35807	0.0183703	0.0990055	4.168	2.155
ENSMUSG00000053963	Stum	195.921	-0.370945	0.53431	-0.69425	0.487526	0.724437	0.115	0.137
ENSMUSG00000026496	Parp1	5070.62	-0.262688	0.244951	-1.07241	0.283535	0.546971	29.763	31.513
ENSMUSG00000058729	Lin9	740.834	-0.606988	0.204489	-2.96831	0.00299441	0.0273915	2.338	3.183
ENSMUSG00000026499	Acbd3	1667.13	0.109098	0.140872	0.774448	0.438666	0.687091	13.022	11.026
ENSMUSG00000103649	Gm37768	9.23801	0.0977668	0.81741	0.119606	0.904796	0.961804	0.114	0.101
ENSMUSG00000103156	Gm38293	43.5273	0.348696	0.383996	0.908074	0.363839	0.624156	1.61	1.168
ENSMUSG00000060743	H3f3a	12711.2	-0.428914	0.184821	-2.3207	0.0203028	0.105891	179.655	219.188
ENSMUSG00000073485	H3f3aos	115.046	-0.703381	0.305483	-2.30252	0.0213056	0.109561	5.255	7.883
ENSMUSG00000038806	Sde2	1576.5	-0.101993	0.160037	-0.637309	0.523924	0.753073	19.28	18.92
ENSMUSG00000103979	Gm20305	80.9466	-2.05553	1.11932	-1.83641	0.066297	0.230684	41.129	148.716
ENSMUSG00000026520	Pycr2	669.48	-0.0249913	0.196056	-0.127471	0.898568	0.958861	31.754	28.938
ENSMUSG00000038793	Lefty1	4.64164	0.947652	0.996263	0.951206	0.3415	0.603826	0.389	0.191
ENSMUSG00000026519	Tmem63a	81.0461	0.516294	0.319626	1.61531	0.106245	0.309479	0.579	0.369
ENSMUSG00000038776	Ephx1	306.435	1.85512	0.449705	4.1252	3.70409e-05	0.000922574	2.779	0.717
ENSMUSG00000026516	Nvl	1481.06	-0.120588	0.150018	-0.803822	0.4215	0.673913	5.237	5.099
ENSMUSG00000062169	Cnih4	1261.63	0.132585	0.131862	1.00548	0.314665	0.579564	11.072	9.114
ENSMUSG00000038733	Wdr26	4470.04	-0.35634	0.134663	-2.64616	0.00814102	0.0561507	20.908	24.056
ENSMUSG00000054135	A430110L20Rik	7.19537	-0.284584	0.877451	-0.32433	0.745688	0.885696	0.489	0.57
ENSMUSG00000081214	Rpl35a-ps2	12.3499	-0.0998041	0.627192	-0.159129	0.873568	0.948153	7.299	7.153
ENSMUSG00000026514	Cnih3	58.6053	-0.952407	0.826035	-1.15299	0.248916	0.51105	0.011	0.019
ENSMUSG00000050625	Ccdc121	7.83939	-0.499773	1.55621	-0.321148	0.748098	0.886171	0.842	1.058
ENSMUSG00000047369	Dnah14	3.87353	-1.67962	1.43425	-1.17108	0.241568	NA	0.001	0.003
ENSMUSG00000004880	Lbr	4434.66	-0.642995	0.22583	-2.84725	0.00440982	0.0364859	26.386	36.831
ENSMUSG00000022995	Enah	4052.72	0.285105	0.174975	1.62941	0.103227	0.303907	7.45	5.521
ENSMUSG00000026511	Srp9	1141.73	0.211697	0.18603	1.13797	0.255131	0.517721	30.635	24.051
ENSMUSG00000038633	Degs1	1662.43	0.652643	0.244375	2.67066	0.00757024	0.0535855	63.469	37.243
ENSMUSG00000100147	1700047M11Rik	5.91817	-0.229803	0.914169	-0.251379	0.801521	0.912248	0.078	0.083
ENSMUSG00000047539	Fbxo28	1703.82	0.0198388	0.186706	0.106257	0.915379	0.966594	13.005	11.763
ENSMUSG00000073482	Gm10517	24.5206	0.535223	0.61609	0.868741	0.384989	0.642622	7.004	4.556
ENSMUSG00000026510	Trp53bp2	1689.24	0.189209	0.238043	0.794853	0.426699	0.678702	7.925	6.407
ENSMUSG00000026509	Capn2	1022.16	0.615707	0.14176	4.3433	1.4036e-05	0.000430214	5.131	3.035
ENSMUSG00000102234	Gm37885	87.0629	1.85098	0.403467	4.58767	4.4821e-06	0.000177836	3.918	0.976
ENSMUSG00000104415	Gm37069	17.7245	2.2809	0.780171	2.92359	0.00346017	0.030697	1.669	0.308
ENSMUSG00000038599	Capn8	2.26057	2.62115	1.74678	1.50056	0.133469	NA	0.008	0.001
ENSMUSG00000038576	Susd4	277.907	1.80293	0.415779	4.33627	1.44919e-05	0.000439331	0.267	0.066
ENSMUSG00000079164	Tlr5	3.96524	-1.7065	0.961986	-1.77393	0.076074	NA	0.02	0.058
ENSMUSG00000030768	Disp1	246.442	0.341944	0.279365	1.224	0.220952	0.476951	0.492	0.354
ENSMUSG00000046836	Brox	1916.51	-0.243209	0.143259	-1.69769	0.0895664	0.279474	17.048	18.263
ENSMUSG00000042901	Aida	771.326	-0.101159	0.180843	-0.559372	0.575908	0.787162	5.401	5.306
ENSMUSG00000056050	Mia3	4082.39	0.308292	0.171042	1.80243	0.0714777	0.242153	19.697	14.269
ENSMUSG00000103415	Gm37339	1.98354	-1.85773	1.89882	-0.978359	0.327897	NA	0.167	0.639
ENSMUSG00000072258	Taf1a	333.223	0.0148952	0.196142	0.0759409	0.939466	0.977094	3.193	2.899
ENSMUSG00000104212	Gm37986	3.64861	-0.34453	1.31897	-0.261211	0.79393	NA	1.577	1.879
ENSMUSG00000053461	Hhipl2	6.87578	-0.116499	0.817853	-0.142444	0.886729	0.953209	0.07	0.071
ENSMUSG00000039384	Dusp10	85.6683	-0.416008	0.33065	-1.25815	0.208338	0.460488	0.245	0.288
ENSMUSG00000044854	1700056E22Rik	18.4419	-0.609163	0.500107	-1.21807	0.223199	0.479516	2.443	3.365
ENSMUSG00000039377	Hlx	19.0809	-0.293526	0.519385	-0.565141	0.571978	0.785168	0.553	0.606
ENSMUSG00000026621	Mtarc1	3.79324	0.770546	0.949865	0.811217	0.417241	NA	0.047	0.024
ENSMUSG00000073481	Mtarc2	1106.2	0.255132	0.23661	1.07828	0.280907	0.544363	7.775	6.006
ENSMUSG00000039349	C130074G19Rik	168.103	-0.0263101	0.43664	-0.0602558	0.951952	0.98265	2.728	2.589
ENSMUSG00000026620	Mark1	878.571	-0.313847	0.225835	-1.38972	0.164615	0.40357	1.506	1.711
ENSMUSG00000102784	Gm38251	5.48147	-0.92805	1.09088	-0.850732	0.394918	0.650187	0.057	0.104
ENSMUSG00000039318	Rab3gap2	1583.88	0.0254968	0.118442	0.215268	0.829558	0.927403	4.093	3.652
ENSMUSG00000026618	Iars2	1867.15	0.0381635	0.134404	0.283946	0.776451	0.899332	8.828	7.767
ENSMUSG00000102526	Gm37785	26.4921	-0.647494	0.509096	-1.27185	0.203427	0.454091	1.406	1.996
ENSMUSG00000026617	Bpnt1	2177.18	0.31387	0.167142	1.87786	0.0604001	0.217136	18.997	13.891
ENSMUSG00000097261	4930532G15Rik	23.4039	-0.148648	0.522386	-0.284556	0.775984	0.89922	1.108	1.091
ENSMUSG00000026615	Eprs	9094.54	0.0293643	0.222331	0.132075	0.894925	0.956697	30.684	26.732
ENSMUSG00000051295	9630028B13Rik	7.07269	-0.686572	0.71874	-0.955244	0.339454	0.601739	0.113	0.164
ENSMUSG00000097615	Gm2061	4.18966	-0.563745	1.85762	-0.303476	0.761527	0.891551	0.04	0.055
ENSMUSG00000026614	Slc30a10	39.1126	0.321611	0.580168	0.554341	0.579345	0.789857	0.56	0.401
ENSMUSG00000039246	Lyplal1	758.275	0.525884	0.412505	1.27486	0.20236	0.452691	6.56	4.123
ENSMUSG00000103449	Gm37134	11.0933	-0.6911	0.913081	-0.756888	0.449117	0.694213	0.032	0.046
ENSMUSG00000103690	A730004F24Rik	1.12534	-1.15291	2.13114	-0.54098	0.588521	NA	0.003	0.006
ENSMUSG00000039239	Tgfb2	1224.99	-0.414744	0.690062	-0.601024	0.547824	0.769298	1.708	2.079
ENSMUSG00000100393	Gm29491	7.45916	-1.44486	1.09818	-1.31569	0.188279	0.434775	0.355	0.9
ENSMUSG00000001305	Rrp15	479.551	-0.149849	0.204438	-0.732981	0.46357	0.705537	2.973	2.954
ENSMUSG00000097784	A430105J06Rik	30.3027	0.515798	0.426841	1.20841	0.22689	0.484816	1.758	1.125
ENSMUSG00000097935	Gm3809	1.41409	-0.268796	1.74488	-0.154048	0.877572	NA	0.357	0.386
ENSMUSG00000039224	D1Pas1	3.01444	0.975651	1.35838	0.718245	0.472606	NA	0.362	0.18
ENSMUSG00000026611	Spata17	47.9065	-0.0908985	0.317293	-0.286481	0.77451	0.89837	0.066	0.064
ENSMUSG00000039210	Gpatch2	998.543	-0.0832579	0.120406	-0.691478	0.489265	0.72593	1.532	1.472
ENSMUSG00000103923	Gm37896	6.54742	1.68257	0.965309	1.74304	0.0813263	0.262895	0.113	0.03
ENSMUSG00000026610	Esrrg	2572.38	0.484241	0.348668	1.38883	0.164884	0.403874	0.871	0.578
ENSMUSG00000103961	Gm36388	1.27309	-1.01083	3.1811	-0.317762	0.750665	NA	0	0.002
ENSMUSG00000103577	9330162B11Rik	11.377	1.971	1.0115	1.94858	0.051345	0.195448	0.573	0.139
ENSMUSG00000026609	Ush2a	15121.7	0.333822	0.275645	1.21106	0.225874	0.483442	5.695	4.201
ENSMUSG00000026608	Kctd3	1603.14	-0.375164	0.132937	-2.82213	0.00477065	0.038359	7.537	8.783
ENSMUSG00000037624	Kcnk2	148.424	0.924985	0.331549	2.78988	0.00527269	0.0411362	0.129	0.063
ENSMUSG00000104507	A430027H14Rik	2.69177	0.359665	1.56569	0.229716	0.818312	NA	0.19	0.139
ENSMUSG00000103087	Gm38122	3.12054	-0.1837	1.07226	-0.17132	0.863973	NA	0.645	0.642
ENSMUSG00000026605	Cenpf	7151.45	-1.0104	0.392501	-2.57426	0.0100454	0.0648804	22.758	40.16
ENSMUSG00000026604	Ptpn14	139.127	-0.116234	0.355528	-0.326934	0.743718	0.884853	0.227	0.222
ENSMUSG00000026603	Smyd2	652.483	0.95789	0.24343	3.93497	8.32086e-05	0.00175748	3.814	1.785
ENSMUSG00000010175	Prox1	86.3857	1.65392	0.743156	2.22553	0.0260457	0.125084	0.389	0.103
ENSMUSG00000079045	Prox1os	2.53689	1.83941	1.82744	1.00655	0.314151	NA	0.011	0.003
ENSMUSG00000103510	Gm30725	4.16468	0.899578	1.23253	0.729865	0.465473	0.706839	0.051	0.024
ENSMUSG00000089872	Rps6kc1	1215.6	0.0422833	0.227197	0.186108	0.85236	0.938031	1.206	1.077
ENSMUSG00000026634	Angel2	1288.88	-0.0241358	0.124135	-0.194432	0.845837	0.934791	11.512	10.623
ENSMUSG00000037568	Vash2	196.821	-0.064834	0.498942	-0.129943	0.896611	0.957933	1.491	1.3
ENSMUSG00000066595	Flvcr1	603.421	-0.278546	0.198147	-1.40576	0.159797	0.396366	5.123	5.573
ENSMUSG00000097845	A230020J21Rik	5.47979	-0.739819	1.05888	-0.698682	0.48475	0.721861	0.111	0.169
ENSMUSG00000057072	Spata45	2.81696	1.44778	1.57259	0.920633	0.357242	NA	0.068	0.023
ENSMUSG00000026632	Tatdn3	271.974	-0.30469	0.201651	-1.51098	0.130795	0.350605	2.763	3.072
ENSMUSG00000062510	Nsl1	723.49	-0.851249	0.33015	-2.57837	0.00992672	0.0643926	4.889	7.715
ENSMUSG00000026630	Batf3	14.1757	-0.859855	0.559198	-1.53766	0.124132	0.340027	0.22	0.347
ENSMUSG00000026628	Atf3	323.837	0.704808	0.221104	3.18768	0.00143419	0.0159829	1.715	0.927
ENSMUSG00000073478	D730003I15Rik	49.8588	0.739733	0.39885	1.85467	0.0636438	0.224757	7.535	4.135
ENSMUSG00000103685	Gm37074	1.65717	-0.685359	1.47483	-0.464704	0.642143	NA	0.16	0.214
ENSMUSG00000103174	Gm37168	8.19765	4.83489	1.4459	3.34386	0.000826223	0.0105117	0.179	0.006
ENSMUSG00000037499	Nenf	1349.44	0.210729	0.188466	1.11813	0.263512	0.526282	26.704	21.065
ENSMUSG00000026627	Pacc1	451.601	-0.14277	0.174612	-0.817638	0.413564	0.666886	3.556	3.508
ENSMUSG00000026626	Ppp2r5a	1658.98	0.254216	0.128546	1.97763	0.0479706	0.186621	6.855	5.211
ENSMUSG00000103114	Gm32200	14.5906	0.825394	0.56477	1.46147	0.143887	0.371285	0.104	0.052
ENSMUSG00000102246	9430037O13Rik	12.0485	-0.343051	0.672094	-0.510421	0.609756	0.809089	2.384	2.599
ENSMUSG00000037474	Dtl	1933.6	-0.936707	0.404987	-2.31293	0.0207264	0.107551	7.318	12.18
ENSMUSG00000037461	Ints7	2631.01	-0.171074	0.220365	-0.776324	0.437558	0.686286	10.424	10.415
ENSMUSG00000026623	Lpgat1	6152.03	0.273313	0.189476	1.44247	0.149171	0.379967	22.395	16.873
ENSMUSG00000102840	Gm38037	34.968	-0.657995	0.551139	-1.19388	0.232524	0.491817	3.056	4.106
ENSMUSG00000026622	Nek2	2550.12	-0.656937	0.386344	-1.70039	0.0890568	0.278331	33.696	46.048
ENSMUSG00000055833	1700034H15Rik	112.3	-0.422193	0.308396	-1.369	0.171	0.412296	1.049	1.265
ENSMUSG00000037434	Slc30a1	2126.84	0.284181	0.282419	1.00624	0.314301	0.579168	85.301	63.181
ENSMUSG00000049353	Rd3	3252.25	0.0298574	0.232363	0.128494	0.897758	0.958522	60.399	53.555
ENSMUSG00000097416	Gm26670	35.5429	-0.507508	0.509646	-0.995805	0.319345	0.583077	1.501	1.91
ENSMUSG00000102915	Gm32460	1.5677	-2.54995	1.78889	-1.42544	0.154029	NA	0.283	1.727
ENSMUSG00000026637	Traf5	418.47	0.653265	0.341167	1.9148	0.0555183	0.205448	1.098	0.633
ENSMUSG00000037395	Rcor3	959.832	-0.087874	0.176262	-0.498541	0.618103	0.814314	4.813	4.622
ENSMUSG00000097316	Gm10516	141.062	0.19062	0.2356	0.80908	0.418469	0.671114	2.063	1.654
ENSMUSG00000058248	Kcnh1	298.341	0.406326	0.422944	0.960709	0.336699	0.598905	0.118	0.078
ENSMUSG00000037375	Hhat	252.224	-0.796161	0.22065	-3.60826	0.000308257	0.0049551	0.145	0.229
ENSMUSG00000094131	Gm22265	8.81744	0.078493	0.778883	0.100776	0.919728	0.969234	11.965	9.645
ENSMUSG00000047384	A730013G03Rik	15.2951	-0.681749	0.603806	-1.12909	0.258862	0.520837	1.002	1.459
ENSMUSG00000100872	1700065J18Rik	2.3981	2.49805	1.61239	1.54928	0.121313	NA	0.787	0.122
ENSMUSG00000016262	Sertad4	471.18	-0.824581	0.25521	-3.23099	0.00123363	0.0142301	6.237	9.792
ENSMUSG00000089812	Gm15867	6.17036	-0.989508	0.867914	-1.1401	0.254245	0.51706	0.545	0.949
ENSMUSG00000016200	Syt14	1478.96	-0.181449	0.150366	-1.20672	0.227542	0.485185	1.95	2.016
ENSMUSG00000103640	Gm31406	1.69026	0.825302	1.72503	0.478427	0.632346	NA	0.292	0.15
ENSMUSG00000016181	Utp25	463.137	-0.399754	0.167691	-2.38386	0.0171319	0.0940293	2.006	2.375
ENSMUSG00000026638	Irf6	3.5045	0.560385	1.33264	0.420506	0.674116	NA	0.038	0.023
ENSMUSG00000079144	A130010J15Rik	372.476	0.113798	0.24632	0.461994	0.644086	0.829509	7.865	6.594
ENSMUSG00000037318	Traf3ip3	23.801	1.09843	0.448267	2.45039	0.01427	0.0832182	0.23	0.097
ENSMUSG00000090080	Gm15872	2.49976	1.84589	1.51775	1.2162	0.223907	NA	0.095	0.023
ENSMUSG00000026639	Lamb3	11.343	1.4799	0.769457	1.9233	0.054442	0.202431	0.025	0.008
ENSMUSG00000016194	Hsd11b1	26.0304	3.1343	0.849702	3.68871	0.000225398	0.00390461	0.171	0.018
ENSMUSG00000009633	G0s2	44.3525	0.51088	0.382952	1.33406	0.182184	0.426489	8.565	5.251
ENSMUSG00000016179	Camk1g	627.807	-0.0244387	0.163891	-0.149115	0.881463	0.950518	5.658	5.235
ENSMUSG00000102648	Gm38022	5.72018	2.68577	1.28414	2.0915	0.0364832	0.156742	6.466	0.849
ENSMUSG00000102981	Gm38322	4.2726	2.14488	1.31596	1.6299	0.103123	0.303728	0.765	0.143
ENSMUSG00000026640	Plxna2	2003.01	-0.921719	0.292551	-3.15062	0.00162922	0.0176199	1.574	2.679
ENSMUSG00000016494	Cd34	364.512	-0.34215	0.279024	-1.22624	0.22011	0.475459	2.299	2.681
ENSMUSG00000097325	Gm16897	43.8705	2.17925	0.577638	3.77269	0.000161499	0.00301551	0.702	0.145
ENSMUSG00000096929	A330023F24Rik	684.392	1.31804	0.360955	3.65155	0.000260664	0.00437491	3.387	1.28
ENSMUSG00000104206	Gm32250	3.222	0.923979	1.165	0.793113	0.427712	NA	0.142	0.071
ENSMUSG00000104077	Gm37027	3.46212	1.20808	1.11821	1.08037	0.279977	NA	2.36	0.939
ENSMUSG00000016493	Cd46	149.697	-0.446959	0.29877	-1.496	0.134654	0.357494	0.513	0.64
ENSMUSG00000104010	Gm37366	7.36393	1.09414	0.849323	1.28825	0.19766	0.44744	0.943	0.422
ENSMUSG00000016481	Cr1l	894.671	0.0162768	0.167963	0.0969069	0.9228	0.9701	5.475	4.871
ENSMUSG00000050530	Fam171a1	691.147	0.110264	0.194305	0.567475	0.570391	0.784318	1.352	1.115
ENSMUSG00000026643	Nmt2	2006.77	-0.447638	0.247305	-1.81006	0.070286	0.239833	8.434	10.031
ENSMUSG00000049950	Rpp38	299.287	0.105776	0.203259	0.5204	0.602785	0.805623	17.944	14.995
ENSMUSG00000026644	Acbd7	24.3537	0.829104	0.434518	1.9081	0.056378	0.207679	1.662	0.849
ENSMUSG00000026645	Olah	2.14036	1.08262	1.28894	0.839933	0.400946	NA	0.014	0.006
ENSMUSG00000026650	Meig1	49.7342	-0.171567	0.590017	-0.290784	0.771217	0.896036	0.82	0.863
ENSMUSG00000026648	Dclre1c	198.149	0.0275321	0.23866	0.115361	0.908159	0.963723	1.098	0.953
ENSMUSG00000026646	Suv39h2	837.905	-0.285778	0.459975	-0.621291	0.534408	0.759913	6.803	7.27
ENSMUSG00000085043	Gm13184	4.62363	0.269293	0.998853	0.269602	0.787466	0.905495	0.175	0.133
ENSMUSG00000109865	Hspa14	1656.06	-0.107192	0.19242	-0.557072	0.577478	0.788475	13.65	13
ENSMUSG00000039496	Cdnf	121.542	0.193569	0.330768	0.58521	0.558407	0.776192	1.97	1.522
ENSMUSG00000026655	Fam107b	6662.55	0.713994	0.211342	3.37838	0.000729135	0.00952639	5.751	3.145
ENSMUSG00000080703	Gm13183	11.835	2.32424	0.799074	2.90867	0.00362975	0.031737	3.26	0.562
ENSMUSG00000085656	Gm13180	3.28305	-2.01613	1.29862	-1.55252	0.120538	NA	0.013	0.045
ENSMUSG00000026657	Frmd4a	1483.33	-0.247332	0.191651	-1.29053	0.196867	0.446535	0.462	0.502
ENSMUSG00000086018	Gm13179	2.38822	1.68958	1.37337	1.23025	0.218604	NA	0.555	0.152
ENSMUSG00000039449	Prpf18	2268.02	-0.00788132	0.154356	-0.0510595	0.959278	0.986009	14.945	13.404
ENSMUSG00000048186	Bend7	743.817	-0.078736	0.231421	-0.340227	0.733685	0.879709	1.844	1.767
ENSMUSG00000026662	Sephs1	3371.28	-0.647675	0.159201	-4.06828	4.73607e-05	0.00112001	20.898	29.098
ENSMUSG00000026664	Phyh	1758.19	1.2564	0.388761	3.23179	0.00123016	0.014201	24.755	9.482
ENSMUSG00000086670	Gm13194	6.97694	0.928809	0.861859	1.07768	0.281176	0.544645	5.528	2.692
ENSMUSG00000069188	Gm13192	68.5769	-0.500733	0.264704	-1.89167	0.0585351	0.212997	67.141	85.023
ENSMUSG00000026668	Ucma	4.35529	-1.12561	1.21989	-0.922713	0.356157	0.617198	0.043	0.085
ENSMUSG00000026669	Mcm10	1197.22	0.0663617	0.469139	0.141454	0.887511	0.953283	11.246	9.119
ENSMUSG00000026672	Optn	468.32	0.674749	0.323923	2.08306	0.0372462	0.159046	3.094	1.768
ENSMUSG00000026676	Ccdc3	159.477	-1.25306	0.386614	-3.2411	0.00119068	0.0138493	0.245	0.534
ENSMUSG00000039145	Camk1d	1311.53	0.469672	0.361198	1.30032	0.193492	0.442242	0.78	0.509
ENSMUSG00000039128	Cdc123	2202.37	0.12321	0.178643	0.689697	0.490384	0.726741	9.981	8.088
ENSMUSG00000025817	Nudt5	976.165	-0.00758165	0.270652	-0.0280125	0.977652	0.992764	7.627	6.651
ENSMUSG00000056718	Gm13199	4.05447	-0.465142	0.949114	-0.49008	0.624077	NA	0.846	1.001
ENSMUSG00000025816	Sec61a2	1080.13	-0.306474	0.169684	-1.80614	0.0708965	0.240815	8.77	9.697
ENSMUSG00000025815	Dhtkd1	85.5034	-0.12608	0.343421	-0.36713	0.713522	0.868927	0.372	0.365
ENSMUSG00000043241	Upf2	1748.04	-0.189912	0.123794	-1.5341	0.125005	0.341501	3.374	3.479
ENSMUSG00000045319	Proser2	456.972	0.0536881	0.392415	0.136815	0.891177	0.955441	4.019	3.572
ENSMUSG00000102887	Gm10857	4.18378	-3.44197	1.12745	-3.05289	0.0022665	0.0224705	0.027	0.269
ENSMUSG00000039063	Echdc3	133.134	-0.133245	0.298264	-0.446736	0.655065	0.835827	1.134	1.126
ENSMUSG00000087125	A230108P19Rik	3.96534	0.323397	0.919474	0.35172	0.725048	NA	0.008	0.006
ENSMUSG00000118578	AL845275.1	7.50875	-0.0535413	0.762593	-0.0702095	0.944027	0.979302	2.024	1.972
ENSMUSG00000039046	Usp6nl	1796.58	-0.353844	0.187702	-1.88513	0.0594118	0.214977	3.024	3.498
ENSMUSG00000086109	Gm13391	2.05447	-0.402277	1.73128	-0.232358	0.81626	NA	0.033	0.038
ENSMUSG00000002107	Celf2	2980.88	-0.0983521	0.400594	-0.245516	0.806057	0.915157	0.662	0.643
ENSMUSG00000082953	Gm13217	53.5275	-0.239025	0.301728	-0.792187	0.428252	0.679446	8.639	9.3
ENSMUSG00000079604	Gm13219	3.81436	1.05476	1.18896	0.887133	0.375007	NA	0.009	0.004
ENSMUSG00000015619	Gata3	13.4542	0.762938	1.11776	0.68256	0.494885	0.730045	0.07	0.039
ENSMUSG00000025782	Taf3	669.179	-0.0431896	0.13221	-0.326674	0.743914	0.884853	1.105	1.022
ENSMUSG00000103570	C630004M23Rik	7.82844	0.000184479	0.721257	0.000255774	0.999796	1	0.902	0.786
ENSMUSG00000025781	Atp5c1	8298.62	0.0475758	0.212612	0.223769	0.822937	0.924394	74.746	63.808
ENSMUSG00000037262	Kin	634.546	-0.133394	0.243174	-0.548553	0.583312	0.791871	10.79	10.518
ENSMUSG00000037254	Itih2	223.107	-0.407612	0.502604	-0.811	0.417366	0.670287	1.186	1.42
ENSMUSG00000025780	Itih5	724.747	-0.519075	0.247406	-2.09807	0.0358993	0.155495	1.282	1.681
ENSMUSG00000061186	Sfmbt2	63.5804	-2.67577	0.470056	-5.69245	1.2523e-08	1.32771e-06	0.019	0.109
ENSMUSG00000083900	Gm13294	2.99515	0.106285	1.05873	0.10039	0.920035	NA	0.473	0.396
ENSMUSG00000026778	Prkcq	57.934	-0.489483	0.75644	-0.647087	0.517575	0.748156	0.076	0.099
ENSMUSG00000102674	8030442B05Rik	2.16834	0.78646	1.5762	0.49896	0.617807	NA	0.008	0.004
ENSMUSG00000086006	Gm13293	3.98606	4.18608	1.78724	2.3422	0.0191703	NA	0.146	0
ENSMUSG00000082424	Gm13292	3.57025	0.827932	0.993048	0.833728	0.404434	NA	1.206	0.605
ENSMUSG00000026773	Pfkfb3	329.818	0.246783	0.335527	0.73551	0.462029	0.704518	0.886	0.65
ENSMUSG00000037197	Rbm17	2540.6	0.115301	0.291902	0.394998	0.692844	0.857022	28.032	22.629
ENSMUSG00000026770	Il2ra	4.46699	1.97969	1.04484	1.89473	0.0581278	0.212089	0.028	0.006
ENSMUSG00000023206	Il15ra	14.4278	0.558672	0.645624	0.865321	0.386862	0.644097	0.08	0.049
ENSMUSG00000058594	Fbh1	2147.06	-0.0568836	0.181473	-0.313454	0.753936	0.888252	12.956	11.898
ENSMUSG00000047909	Ankrd16	222.449	-0.350128	0.287309	-1.21864	0.22298	0.479203	2.918	3.32
ENSMUSG00000026768	Itga8	98.2177	-0.432457	0.402132	-1.07541	0.282191	0.545597	0.107	0.126
ENSMUSG00000086843	E030013I19Rik	2.01468	0.234688	1.36609	0.171796	0.863598	NA	0.039	0.028
ENSMUSG00000026767	Mindy3	787.884	0.127716	0.167338	0.76322	0.445332	0.691947	2.495	2.029
ENSMUSG00000026730	Pter	253.06	0.510058	0.459114	1.11096	0.266585	0.52978	0.668	0.424
ENSMUSG00000049630	C1ql3	592.681	1.4807	0.509887	2.90399	0.00368444	0.0321139	12.433	4.032
ENSMUSG00000104459	Gm37824	14.5317	1.10212	0.588223	1.87365	0.0609786	0.218689	1.277	0.544
ENSMUSG00000102900	Gm37811	61.7799	1.03881	0.747082	1.39049	0.164381	0.403353	3.724	1.645
ENSMUSG00000103599	Gm37356	10.8286	1.38377	0.816583	1.69458	0.0901549	0.280498	1.242	0.442
ENSMUSG00000026727	Rsu1	470.476	-0.163071	0.192809	-0.845767	0.397683	0.652999	0.516	0.509
ENSMUSG00000086358	Gm13270	49.4759	-0.632814	0.361474	-1.75065	0.0800066	0.260189	0.178	0.242
ENSMUSG00000026726	Cubn	54.1378	0.42664	0.701253	0.608398	0.542924	0.765872	0.078	0.055
ENSMUSG00000026723	Trdmt1	346.052	-0.128691	0.158324	-0.81283	0.416315	0.669209	2.14	2.103
ENSMUSG00000026728	Vim	3682.12	0.839349	0.318826	2.63262	0.00847289	0.0577621	118.497	60.62
ENSMUSG00000003418	St8sia6	15.0467	1.02793	0.617582	1.66445	0.0960227	0.291463	0.023	0.01
ENSMUSG00000063275	Hacd1	734.951	-0.0357497	0.234143	-0.152683	0.878648	0.950111	0.846	0.76
ENSMUSG00000086657	Stamos	68.1674	-0.172755	0.323792	-0.533537	0.593662	0.799646	3.486	3.455
ENSMUSG00000026718	Stam	3670.9	0.0643841	0.12341	0.521708	0.601874	0.805071	10.715	9.16
ENSMUSG00000103901	Gm37499	109.861	-0.00444361	0.216079	-0.0205648	0.983593	0.994718	7.225	6.552
ENSMUSG00000061531	Tmem236	14.8419	0.302897	0.630541	0.480377	0.63096	0.822652	0.065	0.046
ENSMUSG00000026712	Mrc1	300.652	-0.130862	0.246249	-0.531421	0.595127	0.800372	0.77	0.777
ENSMUSG00000036949	Slc39a12	229.216	-0.0567628	0.635308	-0.089347	0.928806	0.972862	0.366	0.352
ENSMUSG00000084901	Gm13266	1.22799	0.907931	2.07713	0.437109	0.662032	NA	0.009	0.005
ENSMUSG00000057914	Cacnb2	818.479	0.21939	0.37242	0.589094	0.555798	0.774282	0.532	0.408
ENSMUSG00000070271	Gm13268	2.64817	0.872529	1.22438	0.712631	0.476074	NA	1.671	0.788
ENSMUSG00000026707	Nsun6	328.668	-0.127387	0.222018	-0.573769	0.566124	0.781366	1.113	1.086
ENSMUSG00000017418	Arl5b	1905.99	-0.297924	0.235644	-1.2643	0.206123	0.457708	11.229	12.128
ENSMUSG00000075520	Malrd1	7.94668	-1.66319	0.807216	-2.0604	0.0393599	0.164933	0.001	0.003
ENSMUSG00000103865	Gm37416	26.6299	0.537716	0.614793	0.874628	0.381776	0.639656	22.186	13.746
ENSMUSG00000026748	Plxdc2	315.364	-0.186067	0.451862	-0.411778	0.680502	0.849457	0.13	0.133
ENSMUSG00000053702	Nebl	349.768	0.97042	0.541237	1.79297	0.0729784	0.245267	0.172	0.081
ENSMUSG00000062651	H2al2a	1.55333	1.61092	1.63455	0.98554	0.324359	NA	1.301	0.377
ENSMUSG00000081116	Gm13329	1.50946	4.0865	2.53759	1.61039	0.107313	NA	2.678	0
ENSMUSG00000054057	A930004D18Rik	363.97	0.869338	0.276971	3.13873	0.00169679	0.0181384	8.601	4.295
ENSMUSG00000085319	Gm13330	2.87875	-0.0338464	1.12882	-0.029984	0.97608	NA	0.079	0.073
ENSMUSG00000054074	Skida1	481.274	0.37098	0.198737	1.86669	0.0619443	0.22109	14.708	10.16
ENSMUSG00000086340	1810059C17Rik	15.1721	0.261513	0.586454	0.445922	0.655653	0.836119	1.286	0.956
ENSMUSG00000026743	Mllt10	3059.98	0.00710943	0.129153	0.0550464	0.956101	0.984525	4.245	3.791
ENSMUSG00000026740	Dnajc1	1351.06	0.305072	0.159912	1.90775	0.0564236	0.207801	1.646	1.215
ENSMUSG00000051154	Commd3	1276.96	0.406545	0.224209	1.81324	0.0697949	0.238716	82.899	54.764
ENSMUSG00000026739	Bmi1	6357.51	0.231837	0.176799	1.3113	0.189755	0.436729	154.431	116.15
ENSMUSG00000037708	Spag6	86.826	0.886974	0.363541	2.43982	0.0146947	0.0849039	0.35	0.173
ENSMUSG00000092353	Gm20539	8.85631	0.498645	0.661726	0.753552	0.451118	0.695976	0.117	0.074
ENSMUSG00000097638	Carlr	5.53758	4.74673	1.52044	3.12194	0.00179666	0.0189244	0.889	0.028
ENSMUSG00000026737	Pip4k2a	462.064	0.516039	0.308438	1.67307	0.0943132	0.288364	0.742	0.453
ENSMUSG00000026736	4930426L09Rik	7.90836	-0.490215	0.79378	-0.61757	0.536859	0.761859	0.803	0.95
ENSMUSG00000037683	Armc3	46.9945	-1.25973	0.731518	-1.72207	0.0850569	0.27036	0.055	0.122
ENSMUSG00000087674	4930447M23Rik	5.06238	-1.01083	2.26466	-0.446351	0.655344	0.835962	0	0.01
ENSMUSG00000023094	Msrb2	151.715	0.977272	0.260834	3.74672	0.00017916	0.00322767	1.592	0.724
ENSMUSG00000109733	Gm33940	2.19278	1.56838	1.47538	1.06304	0.287765	NA	0.176	0.052
ENSMUSG00000026735	Ptf1a	1.18471	-3.05075	2.04473	-1.49201	0.135697	NA	0.037	0.312
ENSMUSG00000056329	1810010K12Rik	6.92746	-2.89476	0.901589	-3.21073	0.00132397	0.0150673	0.16	1.045
ENSMUSG00000043415	Otud1	235.301	-0.435372	0.304395	-1.43029	0.152634	0.385664	15.372	19.338
ENSMUSG00000036617	Etl4	276.958	0.455038	0.594726	0.765123	0.444198	0.691081	0.063	0.04
ENSMUSG00000081128	Gm13328	7.04074	0.848704	0.870982	0.974422	0.329847	0.593774	1.789	0.844
ENSMUSG00000036591	Arhgap21	2562.7	-1.34227	0.409195	-3.28027	0.00103709	0.0124438	2.866	6.408
ENSMUSG00000075514	Gm13375	99.5614	-0.901535	0.360647	-2.49978	0.0124272	0.0754893	16.382	27.098
ENSMUSG00000086821	Gm13377	5.21661	-1.53712	1.52284	-1.00937	0.312796	0.578339	0.007	0.018
ENSMUSG00000026679	Enkur	63.1347	-1.15677	0.716657	-1.61412	0.106502	0.309892	0.37	0.754
ENSMUSG00000048550	Thnsl1	796.261	0.437247	0.22518	1.94177	0.0521649	0.197214	19.891	13.316
ENSMUSG00000084071	Gm13378	1.42952	1.47553	1.87606	0.786506	0.431571	NA	1.588	0.568
ENSMUSG00000085680	Gm13327	1.83682	1.78173	2.2275	0.799879	0.423781	NA	0.005	0
ENSMUSG00000045967	Gpr158	262.081	1.53923	0.777111	1.98071	0.0476243	0.186017	0.059	0.018
ENSMUSG00000025716	Myo3a	1.75911	0.331585	1.72627	0.192082	0.847678	NA	0.001	0.001
ENSMUSG00000083863	Gm13341	2.48729	-0.766968	1.40216	-0.546992	0.584384	NA	0.622	0.969
ENSMUSG00000083563	Gm13340	57.8494	0.595442	0.360304	1.65261	0.0984101	0.295616	9.866	5.99
ENSMUSG00000082884	Gm13339	2.14191	1.62575	1.43484	1.13305	0.257191	NA	1.34	0.411
ENSMUSG00000026787	Gad2	150.03	2.73983	1.60622	1.70576	0.0880521	0.275992	0.078	0.01
ENSMUSG00000026786	Apbb1ip	28.9429	0.562579	0.556663	1.01063	0.312194	0.577591	0.076	0.044
ENSMUSG00000069136	A130006I12Rik	6.05181	1.32835	1.04468	1.27154	0.203535	0.454115	4.271	1.485
ENSMUSG00000026784	Pdss1	350.864	-0.12949	0.2433	-0.532223	0.594572	0.800103	1.588	1.522
ENSMUSG00000058835	Abi1	2339.81	0.251282	0.139566	1.80046	0.0717881	0.242654	5.371	4.033
ENSMUSG00000026781	Acbd5	2012.28	0.387126	0.114345	3.38558	0.000710268	0.00935547	10.034	6.913
ENSMUSG00000026779	Mastl	1137.77	-0.442186	0.379063	-1.16652	0.243403	0.504711	5.304	6.183
ENSMUSG00000026775	Yme1l1	6729.55	0.30064	0.146021	2.05888	0.0395058	0.165121	37.918	27.539
ENSMUSG00000081648	Gm13423	15.7307	1.14899	0.669458	1.7163	0.0861068	0.272277	3.113	1.286
ENSMUSG00000026774	Potegl	27.6302	1.54515	0.460386	3.3562	0.000790219	0.0101401	0.146	0.044
ENSMUSG00000069132	Nxph2	4.93875	-0.0829449	1.61686	-0.0512999	0.959087	0.985971	0.003	0.002
ENSMUSG00000026771	Spopl	1262.73	0.0287678	0.130927	0.219724	0.826086	0.925401	4.128	3.647
ENSMUSG00000081519	Gm13331	63.6463	-1.1007	0.794562	-1.3853	0.165962	0.405346	23.419	48.443
ENSMUSG00000026986	Hnmt	74.1106	1.40946	0.527137	2.67381	0.00749956	0.0532442	0.511	0.177
ENSMUSG00000083116	Gm13410	43.6718	-0.411764	0.443601	-0.92823	0.353288	0.614421	5.77	7.107
ENSMUSG00000026981	Il1rn	23.8679	2.47883	0.882828	2.80783	0.00498764	0.0396112	0.562	0.086
ENSMUSG00000026979	Psd4	41.1551	1.16243	0.442145	2.62908	0.00856164	0.0581221	0.223	0.087
ENSMUSG00000084241	Gm13416	9.68031	-0.0460015	0.614498	-0.0748603	0.940326	0.977351	1.285	1.168
ENSMUSG00000004113	Cacna1b	463.987	-0.457942	0.461363	-0.992585	0.320912	0.584523	0.392	0.464
ENSMUSG00000036893	Ehmt1	2873.28	-0.105566	0.144561	-0.730256	0.465234	0.706781	4.581	4.411
ENSMUSG00000026972	Arrdc1	127.94	-0.616939	0.403284	-1.52979	0.126069	0.343118	1.89	2.551
ENSMUSG00000026974	Zmynd19	800.552	-0.2112	0.240192	-0.879297	0.37924	0.637224	12.782	12.994
ENSMUSG00000026975	Dph7	481.632	0.212805	0.139396	1.52662	0.126855	0.344181	11.167	8.596
ENSMUSG00000036850	Mrpl41	950.201	0.00699642	0.164462	0.0425412	0.966067	0.988328	202.319	180.751
ENSMUSG00000036833	Pnpla7	963.064	0.160837	0.281196	0.571977	0.567338	0.782393	2.883	2.352
ENSMUSG00000006476	Nsmf	1069.02	-0.485516	0.358876	-1.35288	0.176094	0.418633	15.855	19.805
ENSMUSG00000118563	AL732309.1	4.54116	-0.0286355	1.1017	-0.0259922	0.979264	0.993623	0.011	0.01
ENSMUSG00000087028	Gm13387	10.8224	0.0358245	0.736881	0.0486165	0.961225	0.987028	0.092	0.078
ENSMUSG00000078202	Nrarp	399.562	-0.37996	0.260611	-1.45796	0.144853	0.372984	25.852	29.943
ENSMUSG00000103217	Gm38287	4.05919	-0.521089	1.36847	-0.380782	0.703365	NA	0.342	0.427
ENSMUSG00000059555	Tor4a	71.9251	0.511443	0.243147	2.10343	0.0354283	0.154121	4.665	2.948
ENSMUSG00000013465	Nelfb	1556.27	-0.0560745	0.156543	-0.358204	0.720191	0.872593	28.26	26.359
ENSMUSG00000036770	Stpg3	2.95823	-2.09916	1.36394	-1.53904	0.123793	NA	0.115	0.46
ENSMUSG00000026969	Fam166a	4.15493	0.214734	1.08701	0.197546	0.8434	0.933313	0.139	0.108
ENSMUSG00000036752	Tubb4b	12510.7	-0.18289	0.316672	-0.577539	0.563575	0.779921	1086.15	1079.23
ENSMUSG00000036731	Cysrt1	11.7928	-0.452007	0.526331	-0.85879	0.390456	0.646856	0.603	0.739
ENSMUSG00000044628	Rnf208	416.577	0.22125	0.227665	0.971824	0.331138	0.594584	76.052	58.636
ENSMUSG00000006471	Ndor1	1.31422	0.0496929	1.78458	0.0278457	0.977785	NA	0.019	0.017
ENSMUSG00000078201	Tmem203	188.47	0.420661	0.321886	1.30686	0.191259	0.439044	49.512	32.229
ENSMUSG00000048707	Tprn	586.047	-1.04027	0.333036	-3.12361	0.00178644	0.0188577	11.536	21.394
ENSMUSG00000026966	Ssna1	949.706	-0.122786	0.175173	-0.700945	0.483337	0.720642	138.155	133.407
ENSMUSG00000026965	Anapc2	1223.42	0.355597	0.171082	2.07852	0.0376616	0.160103	22.137	15.465
ENSMUSG00000026959	Grin1	402.677	2.14317	0.547484	3.91457	9.05641e-05	0.00188533	2.824	0.582
ENSMUSG00000036646	Man1b1	2072.1	0.0739957	0.229918	0.321836	0.747577	0.886072	22.422	18.652
ENSMUSG00000026958	Dpp7	222.985	1.34126	0.220867	6.07271	1.25773e-09	1.96794e-07	17.171	6.152
ENSMUSG00000026956	Uap1l1	195.222	0.266093	0.240978	1.10422	0.269496	0.532687	6.564	4.844
ENSMUSG00000026955	Sapcd2	999.002	-0.774439	0.448874	-1.72529	0.0844745	0.26931	27.304	39.747
ENSMUSG00000015085	Entpd2	34.1648	-0.241932	0.573998	-0.421486	0.673401	0.846008	1.436	1.569
ENSMUSG00000015094	Npdc1	1026.43	0.659556	0.194915	3.38381	0.000714868	0.0094033	24.317	13.559
ENSMUSG00000036587	Fut7	1.56761	1.71835	1.55807	1.10287	0.270082	NA	0.157	0.044
ENSMUSG00000026944	Abca2	1777.99	0.381662	0.201608	1.8931	0.0583452	0.212585	21.237	14.706
ENSMUSG00000047617	Paxx	952.842	0.334224	0.197543	1.69191	0.0906632	0.281583	43.724	31.691
ENSMUSG00000015093	Clic3	11.6156	0.428515	0.723625	0.592178	0.553732	0.772969	1.519	1.02
ENSMUSG00000015090	Ptgds	2225.61	2.02761	0.77052	2.63148	0.00850144	0.0578754	307.504	67.941
ENSMUSG00000015083	C8g	32.8132	0.0770791	0.435667	0.176922	0.85957	0.941116	2.087	1.745
ENSMUSG00000015095	Fbxw5	1031.05	0.0674503	0.242941	0.277641	0.781288	0.902129	45.991	38.347
ENSMUSG00000026942	Traf2	678.092	0.0443711	0.124679	0.355884	0.721927	0.873371	4.993	4.329
ENSMUSG00000015092	Edf1	1940.13	0.236869	0.189618	1.2492	0.211594	0.464563	111.765	83.303
ENSMUSG00000026941	Mamdc4	42.8989	-0.63565	0.3213	-1.97837	0.0478869	0.186435	0.61	0.863
ENSMUSG00000036504	Phpt1	9.96374	0.475011	0.611546	0.776738	0.437313	0.686286	1.464	0.97
ENSMUSG00000029419	Ajm1	102.831	2.26669	0.560255	4.04581	5.21429e-05	0.00120438	4.155	0.769
ENSMUSG00000015087	Rabl6	1613.43	0.480845	0.235989	2.03757	0.0415927	0.170717	14.847	9.323
ENSMUSG00000052403	Fcnaos	39.9317	1.63382	0.481584	3.39261	0.000692302	0.00920003	0.573	0.167
ENSMUSG00000026939	Tmem141	194.337	1.02127	0.287487	3.55239	0.000381752	0.00575505	30.585	13.761
ENSMUSG00000026938	Fcna	8.60086	-0.211036	0.729732	-0.289196	0.772431	0.896924	0.676	0.728
ENSMUSG00000087612	A230005M16Rik	6.34873	0.462782	0.7996	0.578767	0.562746	0.779385	0.421	0.272
ENSMUSG00000049086	Bmyc	190.292	0.198382	0.304641	0.651198	0.514919	0.745556	44.359	34.459
ENSMUSG00000036401	Glt6d1	2.9984	-1.42697	1.36404	-1.04614	0.295496	NA	0.01	0.023
ENSMUSG00000058740	Kcnt1	99.0113	-0.0255143	0.683569	-0.0373252	0.970226	0.989868	0.143	0.128
ENSMUSG00000026933	Camsap1	4979.61	0.266827	0.135347	1.97143	0.0486749	0.188576	20.658	15.551
ENSMUSG00000082357	Gm13542	1.48218	1.2294	1.67914	0.732161	0.464071	NA	0.771	0.291
ENSMUSG00000036352	Ubac1	1266.09	0.0165408	0.174175	0.0949664	0.924342	0.970826	11.79	10.329
ENSMUSG00000026932	Nacc2	585.03	1.09578	0.344977	3.17639	0.00149118	0.0164292	2.233	0.962
ENSMUSG00000087679	Tmem250-ps	520.313	0.431388	0.17904	2.40945	0.0159768	0.0897246	32.685	21.594
ENSMUSG00000087595	1810012K08Rik	2.31355	-0.0490431	2.70849	-0.0181072	0.985553	NA	0.066	0.06
ENSMUSG00000085545	Gm13553	7.42066	0.519732	0.926767	0.560801	0.574933	0.786494	0.495	0.33
ENSMUSG00000026934	Lhx3	3647.67	-0.971802	0.618832	-1.57038	0.116327	0.326529	85.868	156.173
ENSMUSG00000098977	Gm27196	76.5594	-0.658431	0.419893	-1.56809	0.11686	0.32741	5.869	8.389
ENSMUSG00000036327	Qsox2	2945.76	0.397861	0.262956	1.51303	0.130271	0.349712	25.142	16.855
ENSMUSG00000048038	Ccdc187	453.55	0.645664	0.569371	1.13399	0.256797	0.519237	2.818	1.604
ENSMUSG00000026930	Gpsm1	4179.23	-0.291807	0.276162	-1.05665	0.29067	0.554314	25.595	27.634
ENSMUSG00000075467	Dnlz	585.731	0.19336	0.249087	0.776276	0.437586	0.686286	32.825	25.195
ENSMUSG00000026928	Card9	59.4464	0.862401	0.40507	2.12902	0.033253	0.147814	1.932	0.925
ENSMUSG00000086779	Gm13562	36.8299	-0.253225	0.383624	-0.660086	0.509198	0.74059	0.41	0.442
ENSMUSG00000036281	Snapc4	638.758	-0.0973539	0.208352	-0.467256	0.640317	0.828779	7.085	6.683
ENSMUSG00000085767	Gm13563	122.074	-0.309787	0.329579	-0.93995	0.347243	0.609041	2.949	3.244
ENSMUSG00000026927	Entr1	852.077	0.191853	0.176799	1.08515	0.277856	0.540835	28.233	22.039
ENSMUSG00000026926	Pmpca	2815.8	0.188335	0.278477	0.676303	0.498848	0.73274	84.444	64.419
ENSMUSG00000026925	Inpp5e	593.003	0.107775	0.172151	0.626052	0.531281	0.758214	10.165	8.455
ENSMUSG00000026924	Sec16a	3550.62	-0.0482777	0.152089	-0.31743	0.750917	0.887236	21.444	19.688
ENSMUSG00000086714	0610009E02Rik	86.721	-0.29826	0.316288	-0.943002	0.34568	0.607507	1.204	1.338
ENSMUSG00000026923	Notch1	627.616	-0.0205391	0.281359	-0.0729998	0.941806	0.978273	2.086	1.885
ENSMUSG00000026921	Egfl7	22.8742	-0.43903	0.418621	-1.04875	0.294292	0.558207	0.266	0.329
ENSMUSG00000092356	Gm20532	12.3206	-0.325014	0.630314	-0.515639	0.606107	0.807227	0.043	0.048
ENSMUSG00000026922	Agpat2	111.174	0.0293765	0.432198	0.0679699	0.94581	0.980197	2.24	1.944
ENSMUSG00000036186	Dipk1b	87.5796	1.24723	0.509444	2.44821	0.0143567	0.0835731	2.311	0.86
ENSMUSG00000097052	Snora43	1.16016	-2.19619	2.04404	-1.07444	0.282627	NA	0.55	2.278
ENSMUSG00000077192	Snora17	448.434	-1.67569	0.502257	-3.33632	0.000848954	0.0107306	386.071	1088.68
ENSMUSG00000086775	Snhg7os	1.42962	0.475089	1.65017	0.287903	0.773421	NA	0.077	0.048
ENSMUSG00000015787	Abo	1.37028	-0.261243	2.41943	-0.107977	0.914014	NA	0.01	0.009
ENSMUSG00000036160	Surf6	1537.34	0.419717	0.19149	2.19185	0.0283906	0.132891	27.774	18.364
ENSMUSG00000015776	Med22	1565.17	-0.00789044	0.201861	-0.0390885	0.96882	0.989095	62.998	55.918
ENSMUSG00000062647	Rpl7a	5008.42	-0.0359699	0.360598	-0.0997504	0.920542	0.969434	426.995	376.038
ENSMUSG00000015790	Surf1	912.199	0.574732	0.180118	3.19086	0.00141851	0.0158667	79.859	48.086
ENSMUSG00000014873	Surf2	401.489	0.134781	0.233704	0.576718	0.56413	0.780187	23.401	18.663
ENSMUSG00000014867	Surf4	4394.69	0.216962	0.253113	0.857178	0.391347	0.647749	73.873	55.685
ENSMUSG00000049897	Stkld1	15.3527	0.42774	0.509282	0.839889	0.40097	0.65601	0.228	0.149
ENSMUSG00000052406	Rexo4	1131.75	0.623342	0.127099	4.90437	9.37283e-07	4.81089e-05	26.905	15.674
ENSMUSG00000014852	Adamts13	6.22349	0.740883	0.946614	0.782667	0.433823	0.683613	0.029	0.016
ENSMUSG00000015488	Cacfd1	484.666	0.120412	0.279204	0.431269	0.666273	0.842044	9.12	7.418
ENSMUSG00000036067	Slc2a6	31.9043	1.58136	0.768747	2.05706	0.0396806	0.165388	0.777	0.221
ENSMUSG00000087364	Gm13398	1.44618	-0.0910586	1.85279	-0.0491468	0.960802	NA	0.103	0.094
ENSMUSG00000036040	Adamtsl2	36.2109	-0.537291	0.469051	-1.14549	0.252007	0.514759	0.209	0.27
ENSMUSG00000009216	Fam163b	27.376	0.16281	1.09493	0.148694	0.881795	0.950636	0.04	0.031
ENSMUSG00000000889	Dbh	1.99968	-1.73787	2.55544	-0.680065	0.496463	NA	0	0.007
ENSMUSG00000009614	Sardh	131.724	0.180471	0.308479	0.585034	0.558525	0.776253	0.528	0.423
ENSMUSG00000009621	Vav2	280.466	-0.223675	0.196245	-1.13977	0.254382	0.517079	0.329	0.342
ENSMUSG00000109946	Brd3os	305.183	0.124429	0.206382	0.602905	0.546572	0.768422	36.217	29.99
ENSMUSG00000026918	Brd3	2664.11	-0.381334	0.20747	-1.83802	0.0660596	0.23023	8.118	9.404
ENSMUSG00000026917	Wdr5	1369.51	-0.148386	0.226468	-0.655221	0.512326	0.743244	12.438	12.118
ENSMUSG00000080538	Gm25541	31.7705	-0.214677	0.401167	-0.535132	0.592559	0.798779	46.08	48.583
ENSMUSG00000085929	Gm13421	105.254	0.124848	0.383114	0.325877	0.744518	0.885068	7.067	5.661
ENSMUSG00000015846	Rxra	1204.31	-0.411016	0.276846	-1.48464	0.137641	0.361563	2.644	3.213
ENSMUSG00000085766	2810430I11Rik	3.147	0.395596	1.25475	0.315278	0.752551	NA	0.124	0.08
ENSMUSG00000026837	Col5a1	567.865	-0.308998	0.612452	-0.504526	0.613892	0.812022	0.957	0.98
ENSMUSG00000086425	F730016J06Rik	21.6423	-1.68416	0.616225	-2.73304	0.00627536	0.0469401	0.035	0.1
ENSMUSG00000026833	Olfm1	16812.2	-0.115753	0.25627	-0.451683	0.651497	0.833466	100.788	94.799
ENSMUSG00000087196	Gm13373	17.997	0.956256	0.904422	1.05731	0.290369	0.554072	0.473	0.205
ENSMUSG00000035829	Ppp1r26	1803.72	-0.124515	0.154237	-0.807296	0.419496	0.67215	42.135	41.116
ENSMUSG00000026831	1700007K13Rik	56.8287	-0.593652	0.438463	-1.35394	0.175756	0.418252	2.656	3.558
ENSMUSG00000035772	Mrps2	786.209	0.474491	0.288808	1.64293	0.100397	0.29908	59.991	37.242
ENSMUSG00000082895	Rpsa-ps9	61.7788	-0.417937	0.325237	-1.28503	0.198784	0.448778	13.591	16.013
ENSMUSG00000026829	Gbgt1	30.467	0.927356	0.402707	2.30281	0.0212898	0.109508	1.051	0.483
ENSMUSG00000063611	Gm10134	31.3176	0.96932	0.435739	2.22454	0.0261122	0.12531	6.296	2.789
ENSMUSG00000026821	Ralgds	6147.52	-0.706313	0.312169	-2.2626	0.0236604	0.117232	28.236	40.501
ENSMUSG00000087667	Gm13381	1.66731	-0.429331	1.82783	-0.234885	0.814298	NA	0.024	0.03
ENSMUSG00000026816	Gtf3c5	959.042	-0.044772	0.197847	-0.226296	0.820971	0.923751	12.151	11.059
ENSMUSG00000026815	Gfi1b	1.46333	-0.87707	1.90291	-0.460911	0.644863	NA	0.03	0.045
ENSMUSG00000026812	Tsc1	1840.35	-0.14468	0.134256	-1.07764	0.281193	0.544645	7.565	7.547
ENSMUSG00000026809	Spaca9	30.033	0.0283859	0.646029	0.043939	0.964953	0.988229	0.693	0.605
ENSMUSG00000026807	Ak8	71.1604	0.111581	0.46417	0.240387	0.81003	0.917895	0.171	0.143
ENSMUSG00000035666	Gtf3c4	3615.11	0.116944	0.1253	0.933312	0.350659	0.61203	46.393	38.077
ENSMUSG00000026806	Ddx31	478.857	0.323601	0.16705	1.93715	0.0527269	0.198488	1.749	1.252
ENSMUSG00000026805	Barhl1	6.28814	0.17539	1.14637	0.152996	0.878401	0.950039	0.167	0.135
ENSMUSG00000079502	Cfap77	39.7417	0.180749	0.563405	0.320815	0.748351	0.8863	0.087	0.066
ENSMUSG00000026803	Ttf1	761.346	-0.0201888	0.139252	-0.14498	0.884727	0.952042	5.601	5.09
ENSMUSG00000043535	Setx	7465.1	-0.183479	0.16017	-1.14553	0.251991	0.514759	26.627	26.891
ENSMUSG00000035513	Ntng2	1525.49	-1.47095	0.24473	-6.01052	1.84931e-09	2.73896e-07	2.815	7.055
ENSMUSG00000026799	Med27	1244.48	-0.30307	0.171128	-1.77102	0.0765579	0.25283	1.371	1.509
ENSMUSG00000086994	Gm13402	2.4001	-1.61522	1.32963	-1.21478	0.224449	NA	0.004	0.012
ENSMUSG00000039844	Rapgef1	2602.44	-0.0545907	0.213178	-0.25608	0.797889	0.910349	4.356	4.009
ENSMUSG00000079497	Gm13420	1.32181	3.12868	1.90729	1.64038	0.100926	NA	0.053	0
ENSMUSG00000039826	Trub2	1063.27	0.0627074	0.189399	0.331087	0.740579	0.882761	8.28	7.02
ENSMUSG00000026798	Coq4	361.706	0.240697	0.256554	0.938194	0.348145	0.60941	7.944	5.85
ENSMUSG00000059316	Slc27a4	1472.84	0.264649	0.169789	1.5587	0.119068	0.33104	22.466	16.599
ENSMUSG00000069020	Urm1	666.591	0.142358	0.211514	0.673039	0.500922	0.733945	5.717	4.57
ENSMUSG00000039798	2600006K01Rik	3.68551	1.13955	1.18538	0.961341	0.336381	NA	0.479	0.203
ENSMUSG00000039787	Cercam	115.313	-0.447002	0.381615	-1.17134	0.24146	0.502367	1.544	1.864
ENSMUSG00000026790	Odf2	1638.19	-0.292119	0.399251	-0.731668	0.464372	0.706092	7.154	7.51
ENSMUSG00000019715	Gle1	1593.31	-0.153906	0.193077	-0.797122	0.42538	0.677487	12.958	12.697
ENSMUSG00000057738	Sptan1	28486.7	0.469299	0.1645	2.85288	0.00433243	0.0361384	112.896	73.406
ENSMUSG00000039715	Wdr34	1115.28	-0.308864	0.174376	-1.77125	0.0765195	0.252746	12.798	14.101
ENSMUSG00000054766	Set	10056.2	0.1403	0.201136	0.697539	0.485465	0.722537	149.829	119.861
ENSMUSG00000026785	Pkn3	38.7192	-0.218875	0.577017	-0.379321	0.70445	0.864292	0.557	0.553
ENSMUSG00000015335	Zdhhc12	309.057	1.31338	0.411083	3.19492	0.00139868	0.0156862	30.325	10.399
ENSMUSG00000039686	Zer1	1647.19	0.267101	0.173646	1.53819	0.124002	0.339766	13.313	10.097
ENSMUSG00000039678	Tbc1d13	1708.01	0.0443385	0.114216	0.388198	0.69787	0.859798	22.276	19.302
ENSMUSG00000085401	Slc39a1-ps	13.5343	-0.0437846	0.504955	-0.0867098	0.930902	0.973711	2.976	2.771
ENSMUSG00000015337	Endog	251.594	0.578486	0.260758	2.21848	0.026522	0.126814	25.707	15.325
ENSMUSG00000039660	Spout1	861.743	0.124289	0.173707	0.715509	0.474294	0.713741	38.752	31.456
ENSMUSG00000039648	Kyat1	378.727	0.0329275	0.252727	0.130289	0.896338	0.957788	4.172	3.612
ENSMUSG00000100747	1700084E18Rik	17.3321	-0.365109	0.478332	-0.763295	0.445287	0.691932	2.032	2.34
ENSMUSG00000007476	Lrrc8a	35.9301	0.0806462	0.374314	0.215451	0.829416	0.927403	0.289	0.245
ENSMUSG00000099041	Gm28035	4.77846	-0.208444	0.8894	-0.234365	0.814702	0.920179	0.025	0.026
ENSMUSG00000098794	Gm28038	3.62275	-0.116222	1.03509	-0.112283	0.910599	NA	0.036	0.034
ENSMUSG00000075419	Dolk	664.99	0.374006	0.193984	1.92802	0.0538522	0.201407	74.556	50.748
ENSMUSG00000052533	Nup188	2835.1	-0.116044	0.220947	-0.525213	0.599435	0.80336	10.624	10.121
ENSMUSG00000084892	Gm14471	5.62161	0.650932	1.01204	0.643187	0.520103	0.75005	0.075	0.041
ENSMUSG00000026860	Sh3glb2	1278.02	0.720415	0.188568	3.82045	0.000133211	0.00259233	24.439	13.509
ENSMUSG00000026858	Miga2	758.331	0.0955147	0.125684	0.75996	0.447278	0.692403	7.235	6.052
ENSMUSG00000026856	Dolpp1	466.367	0.796942	0.252775	3.15277	0.00161728	0.0175005	15.099	7.888
ENSMUSG00000026853	Crat	481.53	1.1083	0.317029	3.49589	0.000472475	0.00682574	8.634	3.716
ENSMUSG00000087435	Gm16323	1.19909	2.37773	2.16577	1.09786	0.272264	NA	0.128	0
ENSMUSG00000039515	Ptpa	3170.03	0.44619	0.237022	1.88248	0.0597708	0.215593	25.528	16.93
ENSMUSG00000089762	Ier5l	270.111	-1.0522	0.338013	-3.1129	0.00185262	0.019325	12.719	23.022
ENSMUSG00000047363	Cstad	63.9867	1.14875	0.437627	2.62494	0.00866632	0.0585459	0.86	0.338
ENSMUSG00000086405	9330198N18Rik	76.7154	-0.160668	0.322437	-0.498291	0.618279	0.814382	0.219	0.217
ENSMUSG00000087268	Gm14486	25.6494	0.158432	0.544929	0.290739	0.771251	0.896036	0.241	0.189
ENSMUSG00000075416	Gm14488	34.9368	1.12489	0.497375	2.26166	0.0237187	0.117455	1.166	0.459
ENSMUSG00000044320	1700001O22Rik	9.50252	0.926806	1.03341	0.896841	0.369804	0.629153	0.153	0.069
ENSMUSG00000026857	Ntmt1	658.11	-0.0100235	0.245195	-0.0408796	0.967392	0.988642	9.084	8.063
ENSMUSG00000039483	Asb6	436.353	0.410475	0.201499	2.03711	0.0416393	0.170873	13.527	8.949
ENSMUSG00000039476	Prrx2	48.5812	0.00882742	0.366631	0.0240771	0.980791	0.993623	0.275	0.244
ENSMUSG00000050737	Ptges	574.304	0.922149	0.469286	1.96501	0.0494135	0.190451	4.115	1.928
ENSMUSG00000026848	Tor1b	726.342	-0.200272	0.208308	-0.961425	0.336339	0.598652	21.305	21.751
ENSMUSG00000026849	Tor1a	709.814	-0.0176613	0.188162	-0.0938622	0.925219	0.971327	20.503	18.308
ENSMUSG00000026851	BC005624	1503.19	0.38339	0.141432	2.71077	0.00671262	0.0492729	38.515	26.878
ENSMUSG00000026854	Usp20	1226	0.242539	0.17459	1.38919	0.164774	0.403656	7.634	5.83
ENSMUSG00000075415	Fnbp1	505.032	0.219834	0.202455	1.08584	0.277549	0.540835	0.947	0.722
ENSMUSG00000087269	D330023K18Rik	199.176	-0.0684054	0.211524	-0.323394	0.746397	0.885781	6.826	6.41
ENSMUSG00000000194	Gpr107	2078.69	0.166483	0.128437	1.29622	0.194899	0.443621	7.283	5.787
ENSMUSG00000062661	Ncs1	860.169	0.497998	0.308303	1.61529	0.106249	0.309479	2.469	1.577
ENSMUSG00000055632	Hmcn2	11.7302	-0.979866	0.769196	-1.27388	0.202705	0.453303	0.011	0.018
ENSMUSG00000076441	Ass1	79.4427	1.1079	0.362893	3.05296	0.00226595	0.0224705	0.358	0.153
ENSMUSG00000026843	Fubp3	1728.66	-0.220004	0.20373	-1.07988	0.280195	0.543538	7.518	7.711
ENSMUSG00000039356	Exosc2	1339.81	-0.115602	0.268642	-0.43032	0.666963	0.842365	26.241	24.808
ENSMUSG00000087549	Gm13427	5.15087	0.346062	0.949786	0.364358	0.715591	0.870399	0.129	0.09
ENSMUSG00000026842	Abl1	2263.53	-0.08086	0.171047	-0.472735	0.636403	0.826084	4.122	3.9
ENSMUSG00000026841	Fibcd1	70.6675	2.74833	0.743402	3.69697	0.000218191	0.00381381	0.72	0.089
ENSMUSG00000026840	Lamc3	155.039	0.485008	0.390055	1.24343	0.213708	0.466985	0.819	0.525
ENSMUSG00000001864	Aif1l	177.108	-0.675352	0.430457	-1.56892	0.116667	0.327105	1.37	1.98
ENSMUSG00000001855	Nup214	1525.39	0.217951	0.188313	1.15739	0.247114	0.508842	4.542	3.457
ENSMUSG00000050592	Fam78a	33.8518	2.09368	0.4765	4.39386	1.11355e-05	0.000360685	0.283	0.059
ENSMUSG00000051373	Plpp7	418.564	1.07247	0.230403	4.65475	3.24373e-06	0.000136518	8.2	3.448
ENSMUSG00000039262	Prrc2b	11063.2	0.392283	0.120625	3.25209	0.00114558	0.0134781	34.444	23.735
ENSMUSG00000086216	Gm13610	6.18383	-1.15869	0.895695	-1.29363	0.195795	0.444877	0.216	0.429
ENSMUSG00000039254	Pomt1	595.915	0.294072	0.234342	1.25488	0.209522	0.462159	8.296	6.05
ENSMUSG00000002550	Uck1	1060.1	0.222703	0.190113	1.17143	0.241427	0.502367	48.38	36.528
ENSMUSG00000066068	Gm13611	4.26621	-1.4168	0.920515	-1.53914	0.123771	0.339278	1.54	3.729
ENSMUSG00000044627	Swi5	2999.96	-0.0688301	0.186458	-0.369146	0.712019	0.868191	69.37	64.246
ENSMUSG00000002546	Golga2	2714.18	0.253644	0.190474	1.33165	0.182977	0.427242	31.625	23.824
ENSMUSG00000026825	Dnm1	2290.04	1.4422	0.376336	3.83221	0.000126997	0.00249392	12.12	4.018
ENSMUSG00000039205	Ciz1	898.344	-0.0155408	0.169815	-0.091516	0.927083	0.97206	6.677	5.969
ENSMUSG00000039195	1110008P14Rik	285.638	1.40109	0.297916	4.70295	2.56425e-06	0.000112741	16.005	5.32
ENSMUSG00000026822	Lcn2	93.2422	2.72171	0.783283	3.47475	0.000511333	0.00724151	1.883	0.273
ENSMUSG00000026820	Ptges2	473.988	1.02291	0.235428	4.34488	1.39351e-05	0.000428572	11.99	5.206
ENSMUSG00000026819	Slc25a25	3012.81	1.38329	0.330079	4.19078	2.77992e-05	0.00073683	25.251	8.849
ENSMUSG00000039164	Naif1	193.997	-0.0219361	0.191484	-0.114558	0.908796	0.963996	6.527	5.926
ENSMUSG00000103175	Gm37169	1.23595	1.04863	2.04596	0.512539	0.608274	NA	0.065	0.03
ENSMUSG00000039157	Fam102a	770.276	0.361224	0.181037	1.9953	0.0460102	0.181773	4.85	3.408
ENSMUSG00000026810	Dpm2	557.016	0.0503597	0.196366	0.256459	0.797597	0.910349	43.038	36.749
ENSMUSG00000075405	9430097D07Rik	11.9749	1.66195	0.765941	2.16982	0.0300208	0.138025	3.436	1.043
ENSMUSG00000046854	Pip5kl1	6.79006	0.237275	0.792186	0.299519	0.764544	0.892963	0.143	0.106
ENSMUSG00000079442	St6galnac4	1236.44	-0.81035	0.43425	-1.86609	0.0620286	0.221228	19.528	32.508
ENSMUSG00000026811	St6galnac6	1274.74	0.346679	0.356484	0.972496	0.330804	0.594441	16.836	12.364
ENSMUSG00000026817	Ak1	1260.98	0.666249	0.41521	1.60461	0.10858	0.313399	29.663	17.212
ENSMUSG00000026814	Eng	217.706	-0.167698	0.265813	-0.630888	0.528113	0.756475	1.293	1.288
ENSMUSG00000009566	Fpgs	352.727	-0.352163	0.368304	-0.956175	0.338984	0.601405	3.241	3.69
ENSMUSG00000009555	Cdk9	870.176	0.0472669	0.162357	0.291129	0.770953	0.895907	25.618	22.137
ENSMUSG00000059013	Sh2d3c	125.821	0.511347	0.244776	2.08904	0.0367045	0.157504	0.904	0.562
ENSMUSG00000009551	6330409D20Rik	4.38182	0.497695	0.973187	0.511407	0.609066	0.808992	0.131	0.086
ENSMUSG00000039021	Ttc16	362.417	0.0333065	0.650757	0.0511812	0.959181	0.985971	5.733	5.333
ENSMUSG00000009563	Tor2a	729.129	0.410786	0.391887	1.04822	0.294535	0.558422	31.43	19.889
ENSMUSG00000053746	Ptrh1	56.9239	-0.0593386	0.376739	-0.157506	0.874846	0.948467	6.611	6.05
ENSMUSG00000038987	Cfap157	16.2739	-0.700794	0.69255	-1.0119	0.311584	0.57677	0.439	0.652
ENSMUSG00000026797	Stxbp1	3043.64	0.15168	0.167498	0.905561	0.365168	0.624948	10.927	8.942
ENSMUSG00000085397	Gm13524	5.46828	-0.234738	0.899638	-0.260925	0.79415	0.908903	0.412	0.456
ENSMUSG00000087496	Gm13523	10.4007	-0.213435	0.641014	-0.332965	0.739161	0.881884	0.653	0.689
ENSMUSG00000026796	Fam129b	832.479	0.411363	0.197744	2.08029	0.0374994	0.159728	4.596	3.17
ENSMUSG00000026792	Lrsam1	847.712	0.335274	0.177079	1.89336	0.0583097	0.212496	5.782	4.111
ENSMUSG00000038900	Rpl12	7920.07	-0.36161	0.313929	-1.15189	0.249368	0.511441	395.959	445.508
ENSMUSG00000026791	Slc2a8	308.109	-0.301093	0.244417	-1.23188	0.217993	0.472676	6.696	7.237
ENSMUSG00000038860	Garnl3	740.17	0.254148	0.329268	0.771857	0.440199	0.6877	1.022	0.783
ENSMUSG00000038831	Ralgps1	1102.54	0.244419	0.1654	1.47775	0.139475	0.364555	1.08	0.816
ENSMUSG00000004105	Angptl2	135.038	-0.43548	0.408483	-1.06609	0.286383	0.549812	1.025	1.213
ENSMUSG00000068966	Zbtb34	383.282	0.130475	0.217511	0.599854	0.548603	0.770021	3.535	2.836
ENSMUSG00000026788	Zbtb43	1009.71	-0.0616584	0.127414	-0.483924	0.62844	0.82075	11.631	10.891
ENSMUSG00000038765	Lmx1b	19.6059	-0.917209	0.497425	-1.84392	0.0651955	0.228614	0.052	0.089
ENSMUSG00000052951	C130021I20Rik	25.9332	-0.308573	0.435339	-0.708811	0.478442	0.716558	1.454	1.616
ENSMUSG00000085463	9430024E24Rik	30.0101	-0.531668	0.958484	-0.554697	0.579102	0.789803	2.899	3.433
ENSMUSG00000038740	Mvb12b	2260.67	-0.241158	0.147363	-1.63648	0.101738	0.301593	2.955	3.166
ENSMUSG00000087461	C230014O12Rik	189.071	3.46211	0.402653	8.59824	8.09512e-18	1.42783e-14	1.026	0.086
ENSMUSG00000103413	Gm38389	34.802	2.87113	0.509972	5.62998	1.8023e-08	1.81183e-06	1.024	0.126
ENSMUSG00000038718	Pbx3	1963.18	1.113	0.149672	7.43625	1.03583e-13	5.02428e-11	3.035	1.27
ENSMUSG00000084908	C79798	3.33699	0.744909	1.22362	0.608775	0.542673	NA	0.041	0.023
ENSMUSG00000038696	Mapkap1	2151.91	0.121434	0.141994	0.855202	0.39244	0.648452	2.224	1.817
ENSMUSG00000087635	Gm13414	70.3426	-0.0573183	0.281917	-0.203316	0.838888	0.931714	20.419	19.523
ENSMUSG00000026867	Gapvd1	4127.34	0.0070477	0.151049	0.0466583	0.962786	0.987418	11.211	9.922
ENSMUSG00000026864	Hspa5	14074	-0.0342754	0.190207	-0.180201	0.856995	0.940286	555.74	503.159
ENSMUSG00000070953	Rabepk	2642.11	-0.16315	0.356774	-0.457291	0.647462	0.831484	26.908	27.827
ENSMUSG00000035949	Fbxw2	1461.73	0.00236563	0.171587	0.0137868	0.989	0.996557	13.481	11.908
ENSMUSG00000107167	Gm34653	3.7408	1.1006	0.890438	1.23602	0.21645	NA	0.209	0.088
ENSMUSG00000026869	Psmd5	2121.98	0.187883	0.150627	1.24734	0.212274	0.465478	20.946	16.732
ENSMUSG00000026870	Cutal	243.365	1.23442	0.562711	2.19371	0.0282564	0.132423	5.094	2.008
ENSMUSG00000026873	Phf19	191.952	-1.09119	0.360723	-3.025	0.00248632	0.0241077	1.552	2.825
ENSMUSG00000086001	Gm13448	3.93697	-1.25612	1.00705	-1.24733	0.212276	NA	0.137	0.287
ENSMUSG00000026875	Traf1	101.941	-1.05767	0.542756	-1.9487	0.0513314	0.195448	0.939	1.864
ENSMUSG00000083533	Gm13450	4.6664	-0.0518291	0.844878	-0.061345	0.951084	0.982345	5.829	5.551
ENSMUSG00000026874	Hc	11.7578	0.0986373	0.675184	0.146089	0.883851	0.951691	0.029	0.024
ENSMUSG00000035875	AI182371	6.72798	-0.426661	0.737635	-0.578417	0.562983	0.779545	0.061	0.074
ENSMUSG00000057110	Cntrl	1907.74	-0.522877	0.334107	-1.565	0.117583	0.328718	4.849	6.084
ENSMUSG00000026878	Rab14	3045.9	0.209519	0.133901	1.56473	0.117647	0.328761	33.656	26.285
ENSMUSG00000026879	Gsn	448.099	0.358249	0.303097	1.18196	0.237222	0.497965	1.957	1.386
ENSMUSG00000026880	Stom	2907.88	0.0666722	0.322248	0.206897	0.83609	0.930112	29.566	25.966
ENSMUSG00000075391	Glo1-ps	18.8171	0.0315136	0.48338	0.0651943	0.948019	0.980985	8.086	7.17
ENSMUSG00000035778	Ggta1	168.312	0.72516	0.211544	3.42793	0.0006082	0.00835124	0.57	0.311
ENSMUSG00000086555	Gm13446	13.5858	1.23572	0.821959	1.50338	0.132741	0.35411	0.254	0.097
ENSMUSG00000026883	Dab2ip	1376.15	-0.124007	0.267618	-0.463374	0.643096	0.82929	1.615	1.535
ENSMUSG00000026885	Ttll11	445.286	0.899281	0.23405	3.84225	0.000121909	0.00240864	0.554	0.269
ENSMUSG00000026895	Ndufa8	1483.37	0.208835	0.20529	1.01727	0.309026	0.573534	26.523	20.201
ENSMUSG00000026894	Morn5	46.3206	0.580138	0.410525	1.41316	0.157608	0.393453	0.511	0.309
ENSMUSG00000026890	Lhx6	19.9677	-1.22386	0.86828	-1.40952	0.15868	0.394788	0.067	0.141
ENSMUSG00000026889	Rbm18	2056.48	-0.151136	0.123733	-1.22148	0.221906	0.478016	20.183	20.047
ENSMUSG00000026887	Mrrf	704.136	0.182509	0.158427	1.15201	0.249318	0.511441	3.196	2.55
ENSMUSG00000047250	Ptgs1	172.444	0.0193149	0.340512	0.056723	0.954766	0.983664	1.387	1.242
ENSMUSG00000113163	Olfr335-ps	1.73752	-0.296075	1.95571	-0.15139	0.879668	NA	0.492	0.581
ENSMUSG00000083101	Gm13430	3.51568	-0.00208443	0.950172	-0.00219374	0.99825	NA	2.622	2.451
ENSMUSG00000083716	Gm13436	141.326	-0.358955	0.398067	-0.901746	0.367192	0.626811	45.313	51.335
ENSMUSG00000009030	Pdcl	2342.83	0.0736559	0.13954	0.527848	0.597605	0.801901	60.688	52.251
ENSMUSG00000075376	Rc3h2	4185.07	0.218633	0.121689	1.79665	0.0723906	0.243812	18.323	14.12
ENSMUSG00000066798	Zbtb6	1635.87	0.199947	0.158685	1.26002	0.207663	0.459467	20.9	16.308
ENSMUSG00000035437	Rabgap1	4453.82	0.0886571	0.150089	0.590697	0.554723	0.773445	7.878	6.646
ENSMUSG00000026915	Strbp	5593.38	0.261633	0.162414	1.6109	0.107201	0.311177	5.873	4.419
ENSMUSG00000035403	Crb2	273.798	-1.36474	0.497336	-2.7441	0.00606775	0.0456652	1.593	3.765
ENSMUSG00000035392	Dennd1a	2332.31	0.448478	0.162831	2.75425	0.00588266	0.0446539	1.215	0.809
ENSMUSG00000108155	Gm44443	5.48399	0.219779	0.85841	0.25603	0.797927	0.910349	0.165	0.125
ENSMUSG00000000247	Lhx2	274.549	1.74796	0.51508	3.39357	0.000689869	0.00917398	1.369	0.352
ENSMUSG00000098383	Gm27197	6.22978	4.73649	1.56881	3.01916	0.00253475	0.0244066	1.095	0
ENSMUSG00000085950	Gm13589	11.741	1.32636	0.712926	1.86045	0.0628221	0.223046	0.115	0.041
ENSMUSG00000026749	Nek6	1016.66	-0.0100724	0.24962	-0.0403507	0.967814	0.98873	3.002	2.777
ENSMUSG00000026750	Psmb7	4341.51	0.149935	0.221033	0.678337	0.497558	0.731557	17.605	13.95
ENSMUSG00000026751	Nr5a1	18.3116	1.24268	0.754662	1.64667	0.0996262	0.297789	0.142	0.051
ENSMUSG00000063972	Nr6a1	434.177	0.996471	0.269494	3.69756	0.000217678	0.00381173	0.494	0.217
ENSMUSG00000085201	Nr6a1os	44.9747	-0.324094	0.403264	-0.803678	0.421583	0.673935	0.346	0.407
ENSMUSG00000107468	5730507A11Rik	4.34687	-0.966811	1.06348	-0.909102	0.363296	0.623863	0.214	0.372
ENSMUSG00000046618	Olfml2a	318.638	-0.366668	0.472774	-0.775567	0.438005	0.686665	2.322	2.797
ENSMUSG00000085755	Gm13496	1.56438	2.45793	1.78947	1.37356	0.169579	NA	0.267	0.046
ENSMUSG00000035295	Wdr38	15.1273	-0.991997	0.530615	-1.86953	0.0615498	0.220122	0.278	0.487
ENSMUSG00000062997	Rpl35	4791.49	-0.0164371	0.352027	-0.0466926	0.962758	0.987418	255.001	221.006
ENSMUSG00000026755	Arpc5l	815.345	0.260486	0.174196	1.49536	0.134821	0.357736	16.381	12.082
ENSMUSG00000026754	Golga1	1285.51	-0.119317	0.140082	-0.851766	0.394344	0.649606	5.543	5.432
ENSMUSG00000035236	Scai	1667.58	-0.441497	0.162781	-2.71221	0.00668355	0.0491061	2.383	2.912
ENSMUSG00000026753	Ppp6c	1871.58	0.290668	0.128454	2.26282	0.023647	0.117232	14.19	10.452
ENSMUSG00000083240	Gm13453	73.8837	3.5603	0.736836	4.83188	1.35252e-06	6.59334e-05	102.635	7.678
ENSMUSG00000082536	Gm13456	711.848	-0.0463893	0.362783	-0.127871	0.898251	0.958682	120.83	107.018
ENSMUSG00000049252	Lrp1b	450.127	0.147926	0.605945	0.244124	0.807135	0.915738	0.021	0.018
ENSMUSG00000080994	Gm13464	2.45779	-0.0506054	1.14023	-0.0443819	0.9646	NA	0.682	0.64
ENSMUSG00000026866	Kynu	9.33518	1.5808	0.732408	2.15837	0.0308993	0.140778	0.024	0.007
ENSMUSG00000049744	Arhgap15	80.4808	0.970776	0.370862	2.61762	0.00885455	0.0594987	0.034	0.016
ENSMUSG00000036890	Gtdc1	1456.68	-0.134506	0.140579	-0.956803	0.338667	0.601133	0.923	0.924
ENSMUSG00000026872	Zeb2	2757.73	-0.15107	0.148154	-1.01968	0.307881	0.572524	4.853	4.883
ENSMUSG00000052248	Zeb2os	53.4426	-1.1732	0.390687	-3.0029	0.00267419	0.0253467	2.493	4.895
ENSMUSG00000100135	Gm28643	2.66563	1.43495	1.15863	1.23849	0.215536	NA	0.083	0.029
ENSMUSG00000085591	Gm13479	1.18551	-0.927158	1.8865	-0.49147	0.623094	NA	0.003	0.005
ENSMUSG00000086353	Gm13481	2.44029	-0.32331	1.40685	-0.229811	0.818239	NA	0.001	0.001
ENSMUSG00000052155	Acvr2a	1619.67	0.0155684	0.122649	0.126934	0.898993	0.959051	3.921	3.48
ENSMUSG00000026761	Orc4	1285.01	0.205266	0.164248	1.24973	0.211396	0.464287	5.96	4.591
ENSMUSG00000036792	Mbd5	1895	0.377941	0.187713	2.0134	0.0440722	0.177001	1.314	0.921
ENSMUSG00000069495	Epc2	3044.32	-0.396644	0.240109	-1.65193	0.0985483	0.295843	5.382	6.462
ENSMUSG00000026764	Kif5c	4382.1	0.313832	0.23552	1.33251	0.182694	0.426909	4.365	3.239
ENSMUSG00000026765	Lypd6b	221.497	0.19504	0.478014	0.408021	0.683258	0.850817	0.369	0.306
ENSMUSG00000050447	Lypd6	1706.97	0.638936	0.670499	0.952926	0.340627	0.603052	4.73	2.888
ENSMUSG00000026766	Mmadhc	1415.02	0.101876	0.142728	0.713781	0.475362	0.714295	19.422	16.228
ENSMUSG00000085862	Gm13483	359.49	1.40533	0.413301	3.40026	0.000673216	0.00900188	1.047	0.374
ENSMUSG00000083449	Gm13487	1.28734	-1.10721	1.86892	-0.592431	0.553562	NA	0.155	0.319
ENSMUSG00000085429	Gm13485	1.93271	0.898162	1.98268	0.453004	0.650546	NA	0.171	0.087
ENSMUSG00000017144	Rnd3	1891.53	-1.30833	0.36651	-3.56969	0.000357403	0.00549037	16.84	36.893
ENSMUSG00000087701	Gm13493	142.954	0.00429883	0.217829	0.0197349	0.984255	0.994955	66.199	59.2
ENSMUSG00000036249	Rbm43	229.177	0.152674	0.227106	0.672257	0.50142	0.734286	5.198	4.274
ENSMUSG00000026946	Nmi	92.4899	0.543034	0.383765	1.41502	0.157063	0.392648	0.779	0.477
ENSMUSG00000053475	Tnfaip6	16.597	0.843	0.660778	1.27577	0.202037	0.452358	0.176	0.086
ENSMUSG00000036202	Rif1	4090.65	0.091499	0.120176	0.761377	0.446432	0.692127	19.336	16.241
ENSMUSG00000026950	Neb	23.4047	-0.434808	0.640256	-0.679116	0.497065	0.731053	0.015	0.017
ENSMUSG00000036093	Arl5a	2845.43	0.201652	0.0993073	2.03058	0.0422975	0.172624	23.289	18.164
ENSMUSG00000085315	A430018G15Rik	122.533	0.0655223	0.322024	0.20347	0.838768	0.931714	2.906	2.539
ENSMUSG00000017412	Cacnb4	505.607	-0.29678	0.664561	-0.44658	0.655178	0.835915	0.177	0.188
ENSMUSG00000025201	Bloc1s2-ps	3.38177	1.11982	1.41336	0.79231	0.42818	NA	2.596	1.118
ENSMUSG00000055371	Stam2	1887.65	-0.0153751	0.116453	-0.132028	0.894962	0.956697	8.55	7.752
ENSMUSG00000036053	Fmnl2	3308.46	0.00709315	0.291226	0.0243562	0.980569	0.993623	2.553	2.201
ENSMUSG00000061136	Prpf40a	4748.92	0.0251283	0.169447	0.148296	0.882109	0.950816	18.088	15.78
ENSMUSG00000026960	Arl6ip6	1282.34	-0.308195	0.283979	-1.08527	0.277801	0.540835	9	9.695
ENSMUSG00000083287	Gm13502	28.4346	0.0635977	0.364011	0.174714	0.861304	0.941995	10.748	9.186
ENSMUSG00000075334	Rprm	72.8526	-1.16556	0.50086	-2.32712	0.0199591	0.104639	4.079	8.336
ENSMUSG00000060988	Galnt13	250.816	0.846452	0.301148	2.81075	0.00494264	0.0393505	0.103	0.05
ENSMUSG00000087040	Gm14033	1.01112	3.69235	3.44849	1.07072	0.284297	NA	0.028	0
ENSMUSG00000026824	Kcnj3	158.219	1.64541	0.957482	1.71847	0.0857101	0.271457	0.069	0.019
ENSMUSG00000026826	Nr4a2	354.494	0.528035	0.448703	1.1768	0.239274	0.500338	4.559	2.898
ENSMUSG00000084938	BB557941	48.3271	0.399893	0.456655	0.8757	0.381193	0.639177	0.17	0.115
ENSMUSG00000086396	4930555B11Rik	3.43129	0.183868	0.953975	0.192739	0.847163	NA	0.142	0.113
ENSMUSG00000054181	A930012O16Rik	29.9409	0.744363	0.454948	1.63615	0.101808	0.301754	3.258	1.762
ENSMUSG00000026827	Gpd2	907.205	0.359505	0.149881	2.39861	0.0164576	0.0914668	1.48	1.033
ENSMUSG00000026828	Galnt5	1.60196	0.134514	1.77217	0.0759036	0.939496	NA	0.011	0.008
ENSMUSG00000026830	Ermn	49.378	2.04482	0.883503	2.31444	0.0206434	0.107293	0.315	0.071
ENSMUSG00000026832	Cytip	54.3709	1.9161	0.738961	2.59296	0.00951535	0.0625608	0.252	0.055
ENSMUSG00000026834	Acvr1c	81.4605	2.38594	0.81631	2.92284	0.00346855	0.030713	0.182	0.03
ENSMUSG00000086995	Gm13544	3.12565	3.03754	2.13564	1.42231	0.154937	NA	0.038	0
ENSMUSG00000026836	Acvr1	637.247	2.24142	0.332969	6.73162	1.67788e-11	4.17361e-09	1.54	0.291
ENSMUSG00000026839	Upp2	606.578	2.71683	0.354264	7.66895	1.73413e-14	1.01957e-11	1.246	0.177
ENSMUSG00000036641	Ccdc148	469.009	0.671092	0.31709	2.11641	0.0343103	0.151087	0.44	0.255
ENSMUSG00000026991	Pkp4	2743.63	0.265855	0.256259	1.03744	0.299529	0.564438	3.406	2.464
ENSMUSG00000026989	Dapl1	3.63245	-0.454505	1.22903	-0.369808	0.711526	NA	0.047	0.054
ENSMUSG00000081157	Gm13552	10.3865	1.05363	0.623871	1.68886	0.0912465	0.282496	7.779	3.254
ENSMUSG00000035168	Tanc1	330.181	0.222391	0.339657	0.654752	0.512628	0.743507	0.352	0.273
ENSMUSG00000026988	Wdsub1	266.136	0.570782	0.210695	2.70904	0.00674783	0.049423	2.219	1.355
ENSMUSG00000026987	Baz2b	4409.49	0.0938119	0.171153	0.548118	0.583611	0.792166	3.411	2.92
ENSMUSG00000085975	Gm13572	7.66609	-0.587026	0.736104	-0.797476	0.425174	0.677333	0.772	1.076
ENSMUSG00000086603	Gm13620	3.48753	-0.72645	1.0531	-0.689823	0.490306	NA	0.793	1.148
ENSMUSG00000026977	Marchf7	3342.9	0.00573713	0.184841	0.0310382	0.975239	0.99175	17.184	15.394
ENSMUSG00000060703	Cd302	112.895	0.484631	0.301851	1.60553	0.108377	0.313133	0.839	0.539
ENSMUSG00000026980	Ly75	41.3148	0.503677	0.491842	1.02406	0.305805	0.570778	0.08	0.049
ENSMUSG00000054580	Pla2r1	913.62	0.981988	0.246006	3.99173	6.55941e-05	0.00144347	2.051	0.923
ENSMUSG00000086578	Gm13583	5.55098	0.994193	0.846733	1.17415	0.240335	0.501287	0.639	0.298
ENSMUSG00000026971	Itgb6	6.67728	-1.0011	1.02642	-0.975334	0.329394	0.593238	0.007	0.013
ENSMUSG00000026970	Rbms1	528.988	-1.19683	0.263809	-4.53673	5.71323e-06	0.000215658	0.402	0.823
ENSMUSG00000064289	Tank	698.84	0.426205	0.144807	2.94325	0.00324781	0.0292273	2.192	1.479
ENSMUSG00000081954	Gm13626	1.43281	-1.30888	1.93991	-0.674715	0.499857	NA	0.188	0.461
ENSMUSG00000026914	Psmd14	2924.63	0.211273	0.1767	1.19566	0.23183	0.49083	7.3	5.556
ENSMUSG00000035033	Tbr1	68.3623	0.335856	1.03282	0.325185	0.745041	0.885564	0.206	0.149
ENSMUSG00000026904	Slc4a10	1081.91	-1.15567	0.711166	-1.62503	0.104156	0.305662	0.444	0.899
ENSMUSG00000035000	Dpp4	158.289	1.32384	0.465041	2.84672	0.00441728	0.0365164	0.426	0.147
ENSMUSG00000087518	Gm13561	8.84007	1.44861	0.80175	1.8068	0.0707929	0.240631	0.019	0.006
ENSMUSG00000087681	Gm13565	1.55194	1.80283	2.15452	0.83677	0.402722	NA	0.034	0
ENSMUSG00000087422	Gm13564	1.28696	0.779242	2.25029	0.346285	0.729128	NA	0.041	0.016
ENSMUSG00000000392	Fap	127.156	-0.66134	0.475157	-1.39183	0.163973	0.402863	0.378	0.518
ENSMUSG00000026896	Ifih1	330.559	1.16237	0.416952	2.78779	0.00530694	0.0413349	1.736	0.676
ENSMUSG00000026893	Gca	276.419	0.286348	0.276505	1.0356	0.30039	0.564854	2.276	1.7
ENSMUSG00000059742	Kcnh7	269.462	-0.0905168	0.858947	-0.105381	0.916073	0.966907	0.027	0.024
ENSMUSG00000075324	Fign	552.198	0.156713	0.312975	0.500719	0.616569	0.81354	1.22	0.965
ENSMUSG00000082127	Gm13577	111.989	-0.269693	0.219545	-1.22841	0.219292	0.474325	118.681	129.8
ENSMUSG00000026888	Grb14	42.3149	-0.059743	0.509282	-0.117308	0.906616	0.962895	0.066	0.063
ENSMUSG00000034903	Cobll1	160.318	0.960598	0.681725	1.40907	0.158815	0.394991	0.222	0.095
ENSMUSG00000086881	Gm13594	3.03788	-0.228029	1.41683	-0.160942	0.872139	NA	0.627	0.638
ENSMUSG00000061171	Slc38a11	9.73602	-0.386968	0.762874	-0.50725	0.611979	0.810597	0.029	0.033
ENSMUSG00000057182	Scn3a	97.0187	-0.502081	0.603943	-0.831338	0.405783	0.660209	0.038	0.049
ENSMUSG00000075318	Scn2a	588.048	1.67948	0.809123	2.07569	0.037923	0.16064	0.259	0.065
ENSMUSG00000044647	Csrnp3	2309.86	0.889048	0.197059	4.51157	6.43483e-06	0.000236009	2.867	1.391
ENSMUSG00000026994	Galnt3	11.4304	-0.625621	0.603219	-1.03714	0.299672	0.564599	0.043	0.06
ENSMUSG00000034848	Ttc21b	784.432	0.297655	0.248015	1.20015	0.230082	0.488354	2.652	1.935
ENSMUSG00000064329	Scn1a	219.572	3.06027	1.56902	1.95043	0.0511244	0.194991	0.079	0.008
ENSMUSG00000087301	Gm13629	5.20997	0.49942	1.69941	0.293878	0.768851	0.895124	0.003	0.002
ENSMUSG00000075316	Scn9a	5.04793	-0.51501	0.960459	-0.536212	0.591812	0.798656	0.004	0.005
ENSMUSG00000034810	Scn7a	175.3	2.92697	0.764575	3.82823	0.000129067	0.00252435	0.788	0.098
ENSMUSG00000027022	Xirp2	2.99499	-0.150791	1.63696	-0.0921166	0.926605	NA	0.001	0.001
ENSMUSG00000087467	Gm13601	2.39164	0.0148029	1.99472	0.00742106	0.994079	NA	0.005	0.005
ENSMUSG00000034780	B3galt1	371.784	0.272882	0.457619	0.596309	0.550969	0.771107	0.13	0.099
ENSMUSG00000027030	Stk39	1267.32	-0.086807	0.153463	-0.565653	0.571629	0.785168	1.104	1.059
ENSMUSG00000075312	Gm13597	57.7434	0.0759073	0.292186	0.259791	0.795025	0.909229	38.459	32.602
ENSMUSG00000027035	Cers6	599.428	0.570585	0.247538	2.30505	0.021164	0.109032	0.508	0.3
ENSMUSG00000034738	Nostrin	35.5385	0.454939	0.492874	0.923033	0.35599	0.617198	0.086	0.055
ENSMUSG00000005233	Spc25	1268.69	-0.897721	0.410539	-2.18669	0.0287654	0.13416	16.365	26.134
ENSMUSG00000027068	Dhrs9	2.08556	2.65471	1.66144	1.59784	0.110079	NA	0.04	0.006
ENSMUSG00000027070	Lrp2	102.851	0.0288106	0.640972	0.0449483	0.964149	0.98798	0.103	0.092
ENSMUSG00000063145	Bbs5	589.043	0.214969	0.232924	0.922913	0.356053	0.617198	6.508	5.149
ENSMUSG00000075307	Klhl41	30.5545	0.632544	0.650886	0.971819	0.33114	0.594584	0.456	0.258
ENSMUSG00000027086	Fastkd1	382.486	0.92065	0.219168	4.20066	2.66137e-05	0.00071026	3.663	1.701
ENSMUSG00000042133	Ppig	2138.46	0.209865	0.113083	1.85586	0.063474	0.224362	15.742	12.168
ENSMUSG00000070883	Ccdc173	192.726	0.112346	0.209679	0.535802	0.592095	0.7987	1.409	1.187
ENSMUSG00000027088	Phospho2	714.596	0.733966	0.154334	4.75568	1.97777e-06	9.18008e-05	17.167	9.269
ENSMUSG00000081857	Gm13624	1.4002	-2.86859	1.94216	-1.47701	0.139672	NA	0.142	1.098
ENSMUSG00000042155	Klhl23	2013.95	0.437387	0.229142	1.90881	0.0562869	0.207486	33.635	21.776
ENSMUSG00000068882	Ssb	5241.09	0.0793087	0.160646	0.493687	0.621527	0.81688	110.09	92.58
ENSMUSG00000051730	Mettl5	302.222	-0.00180944	0.150421	-0.0120291	0.990402	0.997083	4.664	4.176
ENSMUSG00000085735	Mettl5os	8.75816	0.547993	0.66514	0.823876	0.41001	0.66371	0.692	0.434
ENSMUSG00000044308	Ubr3	4391.21	0.49025	0.141358	3.46814	0.000524072	0.0073735	8.218	5.226
ENSMUSG00000042064	Myo3b	23.9323	-0.103857	0.494138	-0.210178	0.833528	0.929218	0.009	0.009
[truncated: 21,051 more rows]

## Sheet: Supplemental Table S4
Supplemental Table S4: DESeq2 output for genes at P90 vs. P10 time-point comparison.
DESeq2 output P90 vs P10 (RNA-seq)
gene_id	gene_name	baseMean	log2FoldChange	lfcSE	stat	pvalue	padj	mean_tpm_p90	mean_tpm_p10
ENSMUSG00000051951	Xkr4	1105.64	-0.191615	0.606352	-0.316013	0.751992	0.863544	0.5	0.523
ENSMUSG00000103147	Gm7341	2.13309	0.810012	1.46925	0.55131	0.581421	0.746224	0.523	0.278
ENSMUSG00000102343	Gm37381	15.253	-4.1203	1.08307	-3.80428	0.000142215	0.0014053	0.004	0.068
ENSMUSG00000025900	Rp1	10893.9	-2.14641	0.790213	-2.71625	0.00660268	0.0313265	2.272	9.038
ENSMUSG00000025902	Sox17	23.5293	0.643308	0.618668	1.03983	0.29842	0.49915	1.051	0.62
ENSMUSG00000098104	Gm6085	28.6713	0.168441	0.456051	0.369347	0.711869	0.837078	5.29	4.396
ENSMUSG00000103922	Gm6123	71.1032	-0.588217	0.388405	-1.51444	0.129914	0.286744	10.662	14.798
ENSMUSG00000033845	Mrpl15	1231.15	0.29249	0.166104	1.76088	0.0782579	0.202344	23.416	17.827
ENSMUSG00000104217	Gm37988	9.51353	0.638202	0.747827	0.853408	0.393433	0.590651	0.032	0.019
ENSMUSG00000033813	Tcea1	1902.35	0.363377	0.12587	2.88692	0.00389028	0.0209429	11.486	8.379
ENSMUSG00000062588	Gm6104	44.0902	-0.52536	0.447039	-1.1752	0.239914	0.433306	14.234	19.208
ENSMUSG00000103280	Gm37277	12.7813	2.01799	0.813672	2.48011	0.0131344	0.0532741	4.148	0.948
ENSMUSG00000002459	Rgs20	302.817	1.55294	0.333838	4.65177	3.29093e-06	5.89945e-05	0.578	0.183
ENSMUSG00000085623	Gm16041	4.83576	1.44688	0.988407	1.46385	0.143234	0.30644	0.278	0.095
ENSMUSG00000033793	Atp6v1h	3667.75	0.269068	0.198305	1.35684	0.174833	0.350113	8.838	6.905
ENSMUSG00000025905	Oprk1	2.93926	-0.82967	1.44221	-0.575277	0.565104	0.733297	0.027	0.044
ENSMUSG00000033774	Npbwr1	7.76872	0.142615	1.17122	0.121766	0.903085	0.949015	0.639	0.522
ENSMUSG00000025907	Rb1cc1	4238.17	0.139011	0.176312	0.788437	0.430441	0.624828	13.519	11.499
ENSMUSG00000090031	4732440D04Rik	106.572	0.672728	0.320684	2.09779	0.0359234	0.114515	5.295	3.155
ENSMUSG00000103845	Gm19026	17.6537	0.273018	0.544278	0.501615	0.615938	0.77161	0.333	0.263
ENSMUSG00000033740	St18	43.4182	-0.165502	0.767692	-0.215584	0.829312	0.907997	0.021	0.022
ENSMUSG00000102135	Gm37108	5.12299	0.0678391	0.915575	0.0740945	0.940935	0.969486	0.148	0.133
ENSMUSG00000051285	Pcmtd1	2190.88	-0.0102297	0.205864	-0.0496916	0.960368	0.979412	4.971	4.693
ENSMUSG00000048538	Gm9826	75.8146	-0.112556	0.523415	-0.215041	0.829735	0.90822	11.73	12.032
ENSMUSG00000097797	Gm26901	28.5793	-0.402732	0.450682	-0.893606	0.371533	0.5715	0.103	0.128
ENSMUSG00000025909	Sntg1	102.575	3.42081	0.671057	5.09765	3.439e-07	8.483e-06	0.059	0.005
ENSMUSG00000076135	Gm24276	1.93258	1.892	1.78412	1.06047	0.288932	NA	6.277	1.624
ENSMUSG00000061024	Rrs1	570.169	0.409519	0.158622	2.58173	0.00983062	0.0426286	66.348	46.782
ENSMUSG00000025911	Adhfe1	65.1667	1.19294	0.44783	2.66382	0.00772595	0.035327	0.687	0.277
ENSMUSG00000079671	2610203C22Rik	8.4464	-0.438098	0.721806	-0.606947	0.543886	0.716825	0.028	0.035
ENSMUSG00000067879	Vxn	254.24	5.91089	0.891157	6.63283	3.29315e-11	2.35739e-09	6.117	0.093
ENSMUSG00000025912	Mybl1	1090.49	-0.736728	0.230411	-3.19745	0.00138648	0.00917777	6.337	9.851
ENSMUSG00000045210	Vcpip1	2650.25	0.0855239	0.158942	0.538083	0.59052	0.753047	19.262	16.95
ENSMUSG00000097893	1700034P13Rik	18.2154	0.871895	0.564152	1.5455	0.122226	0.275369	0.116	0.06
ENSMUSG00000025915	Sgk3	260.775	0.441107	0.333611	1.32222	0.186095	0.365921	0.66	0.447
ENSMUSG00000046334	Gm6195	22.1882	0.135699	0.513462	0.264282	0.791562	0.887476	15.334	13.268
ENSMUSG00000046101	Mcmdc2	11.371	0.470635	0.542593	0.867381	0.385733	0.584389	0.083	0.056
ENSMUSG00000098234	Snhg6	431.86	-0.0859142	0.252347	-0.34046	0.73351	0.850935	43.825	43.467
ENSMUSG00000099032	Tcf24	62.6928	-0.91234	0.709066	-1.28668	0.198207	0.382356	1.345	2.334
ENSMUSG00000025916	Ppp1r42	98.8271	0.162709	0.521307	0.312118	0.754951	0.865198	0.563	0.468
ENSMUSG00000025917	Cops5	2176.27	0.274831	0.156451	1.75666	0.0789759	0.203554	38.503	29.924
ENSMUSG00000056763	Cspp1	1103.41	0.109029	0.179288	0.608124	0.543105	0.716464	2.627	2.275
ENSMUSG00000067851	Arfgef1	3421.07	0.655226	0.163606	4.00491	6.204e-05	0.000705618	8.69	5.139
ENSMUSG00000042501	Cpa6	2.67876	3.7596	1.63483	2.29969	0.0214657	0.0776568	0.003	0
ENSMUSG00000048960	Prex2	689.943	1.58761	0.504323	3.148	0.00164392	0.0105204	0.796	0.242
ENSMUSG00000057715	A830018L16Rik	169.036	2.03661	0.820276	2.48283	0.0130342	0.0529288	0.137	0.03
ENSMUSG00000016918	Sulf1	553.75	-1.48022	0.477573	-3.09947	0.00193866	0.0120147	0.405	1.043
ENSMUSG00000025938	Slco5a1	12.8466	1.6609	0.828113	2.00564	0.0448948	0.134513	0.036	0.011
ENSMUSG00000005886	Ncoa2	3054.33	-0.0844809	0.205668	-0.410764	0.681246	0.81731	2.768	2.723
ENSMUSG00000101476	Gm29570	3.09578	-0.645142	1.09278	-0.59037	0.554943	0.725083	0.05	0.074
ENSMUSG00000025935	Tram1	3124.66	-0.203918	0.140154	-1.45496	0.145679	0.310222	23.757	25.53
ENSMUSG00000025937	Lactb2	244.565	0.145226	0.241539	0.601252	0.547672	0.719399	1.163	0.98
ENSMUSG00000097711	Gm5523	1.47607	-2.21754	1.64101	-1.35133	0.176589	NA	0.14	0.601
ENSMUSG00000102166	Gm36947	3.07396	-1.84879	1.25845	-1.4691	0.141804	0.304304	0.155	0.521
ENSMUSG00000025932	Eya1	74.0614	-0.201813	0.487436	-0.41403	0.678852	0.815872	0.088	0.093
ENSMUSG00000054493	Gm9947	1.96088	1.41608	1.48266	0.955096	0.339529	NA	0.032	0.011
ENSMUSG00000025930	Msc	9.93723	1.17795	1.2984	0.90723	0.364285	0.564573	0.806	0.322
ENSMUSG00000081201	Smt3h2-ps4	3.47611	0.134089	0.946057	0.141734	0.88729	0.940792	3.117	2.677
ENSMUSG00000082193	Rpl5-ps1	6.5438	0.371079	0.744363	0.498519	0.618118	0.773067	1.783	1.292
ENSMUSG00000032769	Trpa1	1.25606	0.824745	2.294	0.359523	0.719204	NA	0.008	0.004
ENSMUSG00000073737	Gm10566	1.69546	-0.53641	1.81594	-0.29539	0.767696	NA	0.346	0.491
ENSMUSG00000092083	Kcnb2	2534	-0.812542	0.496591	-1.63624	0.10179	0.242257	1.069	1.775
ENSMUSG00000025925	Terf1	673.151	-0.155051	0.195687	-0.792342	0.428161	0.622585	3.945	4.094
ENSMUSG00000104379	Gm37509	15.704	-0.45483	0.523138	-0.869426	0.384614	0.58369	0.984	1.254
ENSMUSG00000032719	Sbspon	7.54583	-1.84934	1.01649	-1.81934	0.0688595	0.184196	0.02	0.066
ENSMUSG00000067795	4930444P10Rik	6.48876	-0.13271	1.14447	-0.115958	0.907686	0.95175	0.046	0.046
ENSMUSG00000043716	Rpl7	16369.1	0.0279982	0.250597	0.111726	0.911041	0.953286	1108.38	1020.75
ENSMUSG00000025921	Rdh10	316.382	-0.0339311	0.204912	-0.165588	0.868481	0.930534	2.269	2.172
ENSMUSG00000025920	Stau2	1470.83	0.25686	0.207086	1.24035	0.214845	0.403935	1.1	0.861
ENSMUSG00000025939	Ube2w	1369.71	0.330827	0.154396	2.14272	0.0321355	0.105438	3.996	2.974
ENSMUSG00000102457	Gm38342	5.41062	0.675823	0.833343	0.810978	0.417378	0.613218	0.513	0.305
ENSMUSG00000079658	Eloc	1591.73	0.0593268	0.128735	0.460845	0.64491	0.792357	23.558	21.261
ENSMUSG00000097744	D030040B21Rik	3.79681	0.674826	1.10397	0.61127	0.541021	0.715095	0.249	0.149
ENSMUSG00000100959	Gm7654	1.82659	0.59248	1.66905	0.354981	0.722604	NA	0.609	0.386
ENSMUSG00000025940	Tmem70	790.271	0.525407	0.156282	3.36191	0.000774065	0.00572084	15.738	10.222
ENSMUSG00000025779	Ly96	22.2915	-0.0776715	0.425121	-0.182704	0.85503	0.922406	0.202	0.2
ENSMUSG00000091020	Gm5828	5.07849	0.430315	2.14174	0.200919	0.840762	0.914523	0.559	0.359
ENSMUSG00000101640	Gm28376	6.07679	4.49245	1.3483	3.33193	0.000862444	0.00624123	0.016	0.001
ENSMUSG00000042686	Jph1	398.167	-0.610139	0.460482	-1.325	0.185171	0.364815	0.597	0.84
ENSMUSG00000025777	Gdap1	1193.32	1.74139	0.196297	8.87122	7.23459e-19	2.43323e-16	21.352	5.932
ENSMUSG00000099899	Gm28784	1.41308	2.14274	2.29375	0.934165	0.350219	NA	0.074	0.014
ENSMUSG00000101589	Rbm6-ps1	20.9484	-0.187639	0.448328	-0.418531	0.675559	0.81355	1.54	1.653
ENSMUSG00000067780	Pi15	30.7585	-6.42327	1.11604	-5.75543	8.64238e-09	3.32348e-07	0.007	0.573
ENSMUSG00000085125	Gm16070	4.95265	-1.89951	1.09863	-1.72897	0.083814	0.212346	0.011	0.036
ENSMUSG00000025776	Crispld1	109.182	-3.49617	0.705914	-4.95268	7.31993e-07	1.63437e-05	0.116	1.192
ENSMUSG00000109887	Gm28756	2.27046	0.123699	1.74775	0.0707763	0.943576	0.970979	0.01	0.008
ENSMUSG00000089787	Gm15825	107.388	-1.21386	0.873519	-1.38962	0.164645	0.336225	0.327	0.743
ENSMUSG00000042596	Tfap2d	337.483	-2.3403	0.808062	-2.89618	0.00377733	0.0205172	0.42	2.048
ENSMUSG00000100720	Gm10075	2.57444	-1.47622	1.38824	-1.06337	0.287612	0.486719	0.638	1.654
ENSMUSG00000025927	Tfap2b	15.0738	-3.01572	0.806275	-3.74031	0.000183795	0.0017324	0.023	0.172
ENSMUSG00000100204	Gm4849	5.78897	-0.801518	0.867065	-0.924403	0.355276	0.555688	0.4	0.64
ENSMUSG00000043760	Pkhd1	5.80125	-0.612113	0.984256	-0.621905	0.534005	0.708828	0.002	0.003
ENSMUSG00000041872	Il17f	16.1678	-0.7812	0.559426	-1.39643	0.162584	0.333463	0.226	0.363
ENSMUSG00000041859	Mcm3	3362.02	0.0504637	0.413714	0.121977	0.902917	0.948975	45.867	41.768
ENSMUSG00000025931	Paqr8	503.153	3.53206	0.497806	7.09525	1.2912e-12	1.25501e-10	4.786	0.38
ENSMUSG00000100929	Gm28064	1.30097	4.39471	2.7906	1.57483	0.115296	NA	0.686	0
ENSMUSG00000041809	Efhc1	198.589	-0.624285	0.321772	-1.94015	0.052362	0.150583	0.845	1.219
ENSMUSG00000041779	Tram2	52.7742	-0.235066	0.41243	-0.569955	0.568708	0.736575	0.119	0.132
ENSMUSG00000099971	Gm28287	2.20914	-0.689193	1.38562	-0.497389	0.618915	0.773799	0.255	0.377
ENSMUSG00000100819	Gm2693	11.144	0.399433	0.775578	0.515013	0.606544	0.764821	0.313	0.228
ENSMUSG00000025933	Tmem14a	146.045	0.903103	0.220041	4.10424	4.05647e-05	0.000493055	3.423	1.708
ENSMUSG00000102633	Gm38224	1.22166	-0.304014	1.63792	-0.18561	0.85275	NA	0.132	0.154
ENSMUSG00000025934	Gsta3	39.1833	-0.570573	0.544308	-1.04825	0.294521	0.494345	0.158	0.222
ENSMUSG00000099343	Gm28836	1.51979	3.17273	1.91439	1.6573	0.0974579	NA	0.032	0.003
ENSMUSG00000096375	Gm7094	1.81795	-0.898553	1.59202	-0.56441	0.572475	NA	0.412	0.733
ENSMUSG00000028033	Kcnq5	218.902	2.51494	0.860311	2.92329	0.00346357	0.0191368	0.196	0.032
ENSMUSG00000041670	Rims1	305.903	4.13102	0.887754	4.65334	3.26596e-06	5.86462e-05	0.32	0.017
ENSMUSG00000101227	Gm29506	6.75765	0.333411	0.946974	0.352081	0.724778	0.844876	0.007	0.006
ENSMUSG00000102766	Gm6420	2.42812	-0.688982	1.16003	-0.593933	0.552557	0.723301	0.478	0.728
ENSMUSG00000065405	Mir30a	1.77184	0.541905	1.44814	0.374209	0.708249	NA	6.817	4.459
ENSMUSG00000097970	Gm27028	4.99312	-0.0468104	1.15289	-0.0406028	0.967613	0.983177	2.938	2.816
ENSMUSG00000026158	Ogfrl1	593.943	0.525617	0.285225	1.84281	0.0653561	0.177474	5.065	3.259
ENSMUSG00000026156	B3gat2	19.5306	-0.292197	0.629127	-0.464448	0.642327	0.790697	0.046	0.053
ENSMUSG00000026155	Smap1	1544.52	0.0421789	0.123498	0.341535	0.732701	0.850416	4.407	3.998
ENSMUSG00000026154	Sdhaf4	569.597	-0.0177455	0.217028	-0.0817659	0.934833	0.966582	12.037	11.456
ENSMUSG00000026153	Fam135a	2166.45	-0.0382804	0.149864	-0.255435	0.798387	0.890276	5.095	4.887
ENSMUSG00000102398	Gm37580	11.7946	0.397917	0.564231	0.705238	0.480662	0.666149	1.189	0.854
ENSMUSG00000026147	Col9a1	8.23222	-0.948691	0.640327	-1.48157	0.138454	0.299296	0.021	0.038
ENSMUSG00000026141	Col19a1	38.5704	1.87357	0.662447	2.82825	0.00468028	0.0242618	0.043	0.011
ENSMUSG00000099997	Tubb4b-ps2	8.81895	0.11931	0.650078	0.183531	0.854381	0.922329	1.503	1.286
ENSMUSG00000100131	Gm28439	97.9582	-0.00767268	0.376098	-0.0204007	0.983724	0.991067	17.52	16.432
ENSMUSG00000067736	Gm10222	23.564	0.223178	0.633473	0.352309	0.724607	0.844768	11.758	9.283
ENSMUSG00000101939	Gm28438	407.136	-0.285262	0.320324	-0.890543	0.373174	0.573168	190.059	217.47
ENSMUSG00000101111	Gm28437	2103.81	-0.128531	0.25144	-0.51118	0.609225	0.766697	472.373	485.802
ENSMUSG00000100862	Gm10925	952.489	0.118177	0.254962	0.463507	0.643001	0.791163	252.082	217.682
ENSMUSG00000102070	Gm28661	811.919	0.0832475	0.271324	0.306819	0.758981	0.867661	225.096	201.129
ENSMUSG00000101249	Gm29216	1213.39	0.168666	0.250059	0.674505	0.49999	0.68227	506.802	426.573
ENSMUSG00000073725	Lmbrd1	2680.15	0.10092	0.247887	0.407119	0.683921	0.818873	5.798	5.065
ENSMUSG00000033569	Adgrb3	1155.94	0.194392	0.437686	0.444136	0.656944	0.800598	0.404	0.324
ENSMUSG00000104516	Gm9884	4.35691	-1.08399	1.01471	-1.06828	0.285395	0.484089	0.563	1.11
ENSMUSG00000086240	Gm7846	43.5512	0.268549	0.333963	0.804127	0.421324	0.61652	39.196	30.774
ENSMUSG00000081557	Gm5697	2.05254	0.257218	1.29992	0.197873	0.843145	0.915939	0.195	0.152
ENSMUSG00000099492	Gm5525	5.29136	0.195923	0.855472	0.229024	0.818851	0.901565	0.738	0.603
ENSMUSG00000100261	Gm6473	11.4088	1.06708	0.718017	1.48614	0.137241	0.297377	1.498	0.673
ENSMUSG00000048874	Phf3	4225.64	0.114919	0.175753	0.653868	0.513197	0.692725	13.146	11.418
ENSMUSG00000117310	Ptp4a1	4.11637	0.196278	1.06464	0.18436	0.853731	0.921956	0.117	0.096
ENSMUSG00000117091	Gm5698	1.35202	0.975674	1.97537	0.493918	0.621364	NA	0.768	0.363
ENSMUSG00000086727	4931428L18Rik	3.29511	1.06739	1.55116	0.688126	0.491373	0.674552	0.003	0.001
ENSMUSG00000070960	Gm19680	13.9546	-0.152093	0.592146	-0.256851	0.797294	0.889794	1.966	2.036
ENSMUSG00000026058	Khdrbs2	66.2913	2.32722	0.753211	3.08974	0.00200335	0.0123255	0.06	0.011
ENSMUSG00000100481	Gm7114	5.38266	0.849106	0.879742	0.965176	0.334457	0.534732	0.734	0.382
ENSMUSG00000026134	Prim2	1353.06	-0.144288	0.250135	-0.57684	0.564047	0.732343	1.368	1.417
ENSMUSG00000103746	1700001G17Rik	12.2787	-0.0123133	0.545161	-0.0225865	0.98198	0.990064	3.191	3.004
ENSMUSG00000004768	Rab23	362.956	0.200393	0.16807	1.19232	0.233137	0.426077	3.699	3.016
ENSMUSG00000042215	Bag2	186.037	-0.3607	0.348731	-1.03432	0.300986	0.501778	2.541	3.072
ENSMUSG00000042197	Zfp451	2459.37	0.239837	0.125422	1.91224	0.0558453	0.15769	11.158	8.811
ENSMUSG00000081402	Gm15455	4.69254	-0.73184	0.89116	-0.821222	0.41152	0.607602	0.323	0.496
ENSMUSG00000042182	Bend6	160.56	1.57665	0.568506	2.77333	0.00554866	0.0275019	1.073	0.335
ENSMUSG00000026131	Dst	7328.46	2.05361	0.191817	10.7061	9.53341e-27	7.4816e-24	6.722	1.513
ENSMUSG00000096992	Gm26788	53.6601	-1.27034	0.656353	-1.93545	0.0529348	0.151676	0.489	1.094
ENSMUSG00000101462	Gm3052	13.9176	1.3454	0.708633	1.89858	0.0576199	0.161432	1.318	0.483
ENSMUSG00000102336	Gm37233	124.352	0.80626	0.352281	2.28868	0.0220979	0.0793101	5.633	3.008
ENSMUSG00000042111	Ccdc115	1035.75	-0.13551	0.161188	-0.840694	0.400519	0.59748	74.131	76.814
ENSMUSG00000026127	Imp4	1023.39	-0.114289	0.149994	-0.761961	0.446083	0.638006	21.298	21.684
ENSMUSG00000026126	Ptpn18	63.7222	-0.23698	0.469083	-0.505199	0.613419	0.769847	0.832	0.938
ENSMUSG00000100280	Gm28417	3.34699	0.186525	0.998196	0.186862	0.851769	0.920776	0.177	0.145
ENSMUSG00000045174	Amer3	92.9402	2.08832	0.384831	5.4266	5.7438e-08	1.76966e-06	3.351	0.733
ENSMUSG00000037509	Arhgef4	984.914	0.0712827	0.388645	0.183413	0.854474	0.922383	1.553	1.362
ENSMUSG00000104002	Gm38336	11.9423	-0.309741	0.61707	-0.501954	0.6157	0.771454	1.035	1.201
ENSMUSG00000037503	Fam168b	7826.99	-0.208861	0.148825	-1.40339	0.160499	0.330562	54.625	59.1
ENSMUSG00000026123	Plekhb2	11792.7	-0.388115	0.356904	-1.08745	0.276839	0.474667	51.934	63.463
ENSMUSG00000045216	Hs6st1	825.232	0.31039	0.149129	2.08136	0.0374014	0.117896	4.877	3.683
ENSMUSG00000037470	Uggt1	3378.63	0.229946	0.171248	1.34277	0.179347	0.356958	7.412	5.898
ENSMUSG00000047180	Neurl3	56.1704	1.29034	0.511308	2.52361	0.0116156	0.0484684	1.411	0.542
ENSMUSG00000037447	Arid5a	225.241	1.33224	0.247669	5.37911	7.48557e-08	2.22457e-06	4.555	1.698
ENSMUSG00000010453	Kansl3	2837.23	0.212784	0.120666	1.76341	0.0778319	0.201611	19.553	15.864
ENSMUSG00000037432	Fer1l5	1.07184	-0.404385	1.77911	-0.227296	0.820193	NA	0.004	0.005
ENSMUSG00000001143	Lman2l	802.933	-0.17254	0.211697	-0.815033	0.415054	0.610946	5.849	6.097
ENSMUSG00000037408	Cnnm4	1226.2	0.442774	0.147318	3.00556	0.00265094	0.0154273	7.305	5.011
ENSMUSG00000001138	Cnnm3	1931.71	-0.367052	0.259584	-1.414	0.157361	0.32651	23.727	28.652
ENSMUSG00000102845	Gm38033	2.54999	-1.03987	1.19029	-0.873623	0.382324	0.581847	0.689	1.301
ENSMUSG00000109510	Gm42417	5.5006	0.79353	0.765271	1.03693	0.29977	0.500775	0.195	0.105
ENSMUSG00000079610	Ankrd39	163.218	-0.125556	0.195213	-0.643174	0.520111	0.69795	3.504	3.566
ENSMUSG00000026121	Sema4c	450.618	-0.00809893	0.337994	-0.0239618	0.980883	0.989635	10.997	10.376
ENSMUSG00000087589	D430040D24Rik	88.5536	-0.881267	0.397845	-2.2151	0.0267529	0.0916521	1.898	3.291
ENSMUSG00000046337	Fam178b	13.1332	-0.425524	0.631399	-0.673938	0.500351	0.682499	0.022	0.028
ENSMUSG00000061518	Cox5b	3005.08	0.480762	0.195763	2.45584	0.0140555	0.0560237	329.766	220.918
ENSMUSG00000037351	Actr1b	3458.01	0.195244	0.12493	1.56282	0.118095	0.268604	50.069	40.8
ENSMUSG00000102416	4933424G06Rik	18.2795	0.457801	0.544239	0.841176	0.400249	0.597203	0.083	0.057
ENSMUSG00000026117	Zap70	8.18441	1.21948	0.766809	1.59033	0.111761	0.258413	0.125	0.051
ENSMUSG00000026116	Tmem131	1751.13	0.332451	0.203032	1.63743	0.10154	0.241882	2.785	2.061
ENSMUSG00000050122	Vwa3b	45.2543	-0.18055	0.519661	-0.347438	0.728262	0.847307	0.064	0.067
ENSMUSG00000026114	Cnga3	1141.22	1.27954	0.365409	3.50166	0.000462368	0.00369842	7.867	3.07
ENSMUSG00000026113	Inpp4a	926.276	0.672986	0.264683	2.54261	0.0110029	0.0464888	2.171	1.267
ENSMUSG00000026112	Coa5	1469.6	0.197416	0.166704	1.18423	0.236321	0.429483	23.877	19.529
ENSMUSG00000026111	Unc50	931.541	0.545051	0.11396	4.78282	1.72855e-06	3.36638e-05	27.334	17.589
ENSMUSG00000026110	Mgat4a	262.747	0.885795	0.26597	3.33043	0.00086711	0.00626644	0.702	0.352
ENSMUSG00000026090	2010300C02Rik	223.845	2.77519	0.73317	3.78519	0.000153593	0.00150601	1.053	0.142
ENSMUSG00000060771	Tsga10	577.752	-0.652413	0.332366	-1.96293	0.0496539	0.14498	0.794	1.173
ENSMUSG00000097268	Gm26805	10.299	1.06693	0.764634	1.39534	0.162912	0.333941	0.51	0.224
ENSMUSG00000037216	Lipt1	121.569	0.15534	0.220755	0.703676	0.481634	0.666581	5.852	4.923
ENSMUSG00000026088	Mitd1	180.935	0.215591	0.199865	1.07868	0.28073	0.479167	2.605	2.11
ENSMUSG00000026087	Mrpl30	1285.77	0.100948	0.160833	0.627655	0.53023	0.705852	36.518	31.885
ENSMUSG00000058407	Txndc9	1856.33	0.134466	0.189196	0.71072	0.477257	0.663688	32.186	27.595
ENSMUSG00000026083	Eif5b	2045.81	0.228706	0.17052	1.34123	0.179847	0.357787	7.516	6.006
ENSMUSG00000026082	Rev1	2317.61	0.474062	0.27327	1.73477	0.0827807	0.210797	6.817	4.622
ENSMUSG00000102716	Gm5099	1.5741	-0.329069	1.47389	-0.223266	0.823328	NA	0.012	0.015
ENSMUSG00000037138	Aff3	380.978	0.300857	0.362112	0.830838	0.406065	0.602686	0.225	0.175
ENSMUSG00000085391	Gm16150	21.0205	2.67063	0.841815	3.17247	0.00151148	0.00983624	0.846	0.123
ENSMUSG00000087131	Gm16152	2.13942	2.72861	2.71738	1.00413	0.315315	0.51575	0.108	0.016
ENSMUSG00000048814	Lonrf2	1474.59	-0.0899984	0.319327	-0.281838	0.778068	0.880474	6.22	6.162
ENSMUSG00000026080	Chst10	304.234	0.168345	0.316719	0.531527	0.595054	0.756518	2.089	1.734
ENSMUSG00000026078	Pdcl3	969.251	0.346351	0.132953	2.60506	0.00918576	0.0404372	20.65	15.216
ENSMUSG00000026077	Npas2	55.9451	2.52514	0.780557	3.23504	0.00121624	0.00824936	0.161	0.026
ENSMUSG00000073702	Rpl31	6621.44	0.140464	0.248909	0.564318	0.572538	0.73923	393.062	333.455
ENSMUSG00000003134	Tbc1d8	7712.02	0.520577	0.275436	1.89001	0.0587562	0.163728	18.08	11.938
ENSMUSG00000003135	Cnot11	828.603	0.314205	0.122298	2.56918	0.0101938	0.0438312	16.803	12.633
ENSMUSG00000085894	Gm15832	24.2433	-0.087256	0.414445	-0.210537	0.833249	0.910286	1.219	1.211
ENSMUSG00000048234	Rnf149	766.95	0.341836	0.161601	2.1153	0.034404	0.110704	7.404	5.505
ENSMUSG00000050967	Creg2	245.726	3.28432	0.761901	4.3107	1.62742e-05	0.000226417	3.767	0.352
ENSMUSG00000097083	D930019O06Rik	9.22701	3.27689	0.958995	3.417	0.000633146	0.00482407	0.646	0.064
ENSMUSG00000057173	Rfx8	3.73332	-0.290465	1.0183	-0.285246	0.775456	0.878626	0.012	0.014
ENSMUSG00000026074	Map4k4	3064.31	0.0983924	0.221484	0.444241	0.656868	0.800591	5.758	5.04
ENSMUSG00000026073	Il1r2	9.14505	2.0976	0.825316	2.54157	0.0110355	0.0465984	0.057	0.013
ENSMUSG00000097899	Gm16894	3.73315	1.37976	1.07252	1.28646	0.198281	0.382452	0.143	0.051
ENSMUSG00000026072	Il1r1	100.469	0.693548	0.33119	2.09411	0.0362501	0.115254	0.27	0.157
ENSMUSG00000070942	Il1rl2	18.5772	0.508733	0.668875	0.76058	0.446908	0.638453	0.085	0.055
ENSMUSG00000026069	Il1rl1	3.89072	-1.6388	1.04565	-1.56725	0.117056	0.26687	0.012	0.034
ENSMUSG00000026070	Il18r1	6.13313	1.99398	1.12315	1.77535	0.0758406	0.198051	0.037	0.009
ENSMUSG00000026068	Il18rap	5.6497	1.45021	0.937402	1.54705	0.121851	0.274916	0.042	0.014
ENSMUSG00000026062	Slc9a2	23.7856	-0.56095	0.849364	-0.660435	0.508974	0.689519	0.034	0.046
ENSMUSG00000041945	Mfsd9	166.573	-0.462308	0.179367	-2.57743	0.00995366	0.0430337	1.547	1.999
ENSMUSG00000079588	Tmem182	4.74548	0.379177	1.12632	0.336651	0.73638	0.853191	0.027	0.02
ENSMUSG00000100832	Gm29260	1.88722	1.57814	1.84008	0.857645	0.391088	NA	0.006	0.002
ENSMUSG00000101299	Gm28175	9.24833	4.80863	1.44972	3.31695	0.000910073	0.00649059	0.134	0.004
ENSMUSG00000060424	Pantr1	94.0062	0.141097	0.832006	0.169587	0.865335	0.928572	0.274	0.226
ENSMUSG00000093436	Gm20646	15.6896	0.6961	0.958051	0.726579	0.467484	0.655668	0.108	0.06
ENSMUSG00000097063	Pantr2	2.84606	1.1926	1.27851	0.932804	0.350921	0.551305	0.15	0.061
ENSMUSG00000099784	Dalir	2.18022	2.77951	1.88972	1.47086	0.14133	0.303554	0.475	0.064
ENSMUSG00000060679	Mrps9	987.278	0.0572672	0.15195	0.376883	0.70626	0.833609	4.146	3.746
ENSMUSG00000041907	Gpr45	21.607	2.61621	0.882588	2.96424	0.00303427	0.0171953	0.135	0.02
ENSMUSG00000070939	Tgfbrap1	963.394	0.180669	0.113997	1.58486	0.112997	0.260487	4.297	3.548
ENSMUSG00000041878	8430432A02Rik	16.2081	1.21023	0.557246	2.17181	0.0298703	0.0998299	3.772	1.537
ENSMUSG00000010290	AI597479	1469.23	-0.0960633	0.205478	-0.467512	0.640134	0.789053	17.334	17.481
ENSMUSG00000008136	Fhl2	125.01	0.900348	0.691217	1.30256	0.192727	0.375028	0.553	0.272
ENSMUSG00000094497	Gm8210	19.1208	-4.33033	1.46797	-2.94988	NA	NA	1.148	23.378
ENSMUSG00000066877	Nck2	1104.14	0.0285595	0.22255	0.128328	0.897889	0.946267	1.999	1.843
ENSMUSG00000026051	Ecrg4	316.147	-3.03071	1.41745	-2.13815	0.0325047	0.106156	1.393	10.989
ENSMUSG00000100764	Gm29155	5.93475	0.0831884	0.85898	0.0968456	0.922849	0.959812	0.606	0.54
ENSMUSG00000100635	Gm29157	2.31353	-4.83339	1.72468	-2.80248	0.00507108	0.0256876	0	1.652
ENSMUSG00000100480	Gm29156	4.19959	0.257746	0.991955	0.259836	0.79499	0.889061	1.936	1.513
ENSMUSG00000057363	Uxs1	480.772	0.0871411	0.158077	0.551258	0.581457	0.746224	1.359	1.201
ENSMUSG00000041763	Tpp2	2565.75	0.161819	0.144605	1.11904	0.263121	0.459324	8.466	7.085
ENSMUSG00000047343	Mettl21c	3.88761	0.168131	1.0876	0.154588	0.877146	0.934892	0.052	0.043
ENSMUSG00000091844	Gm8251	48.956	0.393902	0.29276	1.34548	0.178471	0.355583	0.499	0.356
ENSMUSG00000026049	Tex30	578.675	0.431194	0.31963	1.34904	0.177323	0.354029	9.897	6.846
ENSMUSG00000101104	Gm29247	11.6365	-0.6227	0.590566	-1.05441	0.291694	0.491117	0.104	0.15
ENSMUSG00000026047	Poglut2	174.549	0.125461	0.252377	0.497117	0.619106	0.773892	3.298	2.826
ENSMUSG00000041684	Bivm	927.076	0.115029	0.127618	0.901351	0.367402	0.567535	8.026	6.923
ENSMUSG00000026048	Ercc5	1058.65	0.238263	0.201567	1.18205	0.237185	0.430505	7.38	5.92
ENSMUSG00000101567	Txn-ps1	9.41662	-0.170171	0.617695	-0.275494	0.782937	0.883462	5.826	6.168
ENSMUSG00000056870	Gulp1	184.799	-2.41003	0.445324	-5.41187	6.23712e-08	1.9043e-06	0.05	0.243
ENSMUSG00000026043	Col3a1	4605	-2.26644	0.742064	-3.05424	0.0022563	0.0135589	8.602	37.765
ENSMUSG00000026042	Col5a2	1033.02	-1.43681	0.618629	-2.32257	0.0202023	0.0743298	0.947	2.362
ENSMUSG00000025995	Wdr75	1476.62	0.397271	0.190726	2.08295	0.037256	0.117609	12.464	8.862
ENSMUSG00000084817	Gm5526	2.66674	-1.00647	1.15734	-0.869641	0.384497	0.58369	1.14	2.151
ENSMUSG00000025993	Slc40a1	256.2	0.0261848	0.408298	0.0641316	0.948865	0.973717	2.858	2.582
ENSMUSG00000041144	Dnah7b	471.84	-1.13511	0.428226	-2.65072	0.00803205	0.0364045	0.218	0.435
ENSMUSG00000101262	Gm8326	1.51411	0.967635	1.53535	0.630236	0.52854	NA	0.17	0.081
ENSMUSG00000101337	Dnah7c	31.2126	-0.639127	0.643701	-0.992895	0.320761	0.521092	0.011	0.015
ENSMUSG00000025986	Slc39a10	1954.43	-0.0396808	0.225902	-0.175655	0.860565	0.925892	5.141	4.902
ENSMUSG00000081185	Gm4852	1.72021	-0.399358	1.71818	-0.23243	0.816204	NA	0.377	0.468
ENSMUSG00000100033	Gm8337	5.37252	0.066585	0.996735	0.0668031	0.946738	0.972486	0.568	0.506
ENSMUSG00000026109	Tmeff2	133.904	1.5809	0.683355	2.31344	0.0206986	0.0756961	0.179	0.055
ENSMUSG00000101799	9330175M20Rik	2.52174	1.22007	1.22707	0.994293	0.32008	0.520345	0.007	0.003
ENSMUSG00000045954	Cavin2	295.24	-2.68926	0.422605	-6.36354	1.9716e-10	1.15724e-08	1.149	6.903
ENSMUSG00000026107	Nabp1	402.598	-0.175919	0.241787	-0.72758	0.466871	0.655193	6.3	6.653
ENSMUSG00000099413	Gm17767	7.10962	1.92049	0.829691	2.31471	0.0206288	0.0754929	0.026	0.007
ENSMUSG00000101741	Gm28055	35.047	1.32619	0.640352	2.07104	0.0383555	0.120097	0.137	0.05
ENSMUSG00000018417	Myo1b	3246.75	2.14465	0.242305	8.85103	8.67163e-19	2.82682e-16	7.284	1.547
ENSMUSG00000072324	Gm8420	64.6012	-0.123146	0.41823	-0.294446	0.768417	0.87392	20.158	20.31
ENSMUSG00000062939	Stat4	34.5145	2.21383	0.855338	2.58826	0.00964635	0.0419964	0.06	0.013
ENSMUSG00000101628	Gm28177	20.6375	2.00714	0.748574	2.68128	0.00733403	0.0339081	0.056	0.013
ENSMUSG00000109599	Gm31812	70.616	0.672581	0.401031	1.67713	0.0935173	0.228657	2.932	1.745
ENSMUSG00000026104	Stat1	707.592	0.920669	0.367333	2.50636	0.0121982	0.0503738	4.345	2.216
ENSMUSG00000026103	Gls	3149.47	0.552547	0.205736	2.68571	0.00723763	0.0335649	11.079	7.087
ENSMUSG00000099648	Gm5975	1.54813	1.00433	1.7327	0.579634	0.562161	NA	0.199	0.094
ENSMUSG00000002881	Nab1	2089.56	-0.322921	0.297287	-1.08623	0.277379	0.475363	8.923	10.606
ENSMUSG00000100120	Gm553	2.45406	-1.13802	1.40883	-0.807779	0.419218	0.614813	0.005	0.009
ENSMUSG00000100007	Gm5527	143.926	-0.592976	0.235195	-2.52121	0.0116952	0.0487432	42.194	59.244
ENSMUSG00000043015	Nemp2	281.777	-0.0756724	0.238939	-0.316702	0.751469	0.863205	3.094	3.092
ENSMUSG00000103630	Gm37242	3.87213	1.18733	1.30759	0.908028	0.363863	0.56429	0.465	0.187
ENSMUSG00000041439	Mfsd6	639.924	1.42856	0.241971	5.90386	3.55091e-09	1.55777e-07	2.621	0.91
ENSMUSG00000026102	Inpp1	816.739	0.30193	0.233574	1.29265	0.196132	0.379495	5.701	4.332
ENSMUSG00000041426	Hibch	565.031	0.188317	0.173068	1.08811	0.276546	0.474267	1.593	1.301
ENSMUSG00000043629	1700019D03Rik	19.1283	2.12903	0.718382	2.96364	0.00304021	0.0172105	0.068	0.014
ENSMUSG00000060715	1700019A02Rik	43.7083	-0.482841	0.387127	-1.24724	0.212309	0.40062	0.236	0.304
ENSMUSG00000026098	Pms1	1344.66	-0.112696	0.187797	-0.600098	0.548441	0.720097	2.574	2.605
ENSMUSG00000100679	Gm28778	12.3595	-0.202424	0.663306	-0.305175	0.760233	0.868621	0.106	0.111
ENSMUSG00000026096	Osgepl1	198.43	0.218152	0.215286	1.01331	0.31091	0.511163	3.701	2.98
ENSMUSG00000099913	Gm28551	4.26776	-0.401576	0.907779	-0.442372	0.65822	0.80147	0.03	0.038
ENSMUSG00000096141	Dnah7a	50.6544	-0.671132	0.375599	-1.78683	0.0739645	0.194109	0.03	0.044
ENSMUSG00000026094	Stk17b	877.283	-0.27967	0.217835	-1.28386	0.19919	0.383437	6.375	7.198
ENSMUSG00000042807	Hecw2	1576.91	0.0710711	0.325342	0.21845	0.827078	0.906664	1.008	0.92
ENSMUSG00000025983	Ccdc150	83.3968	0.275956	0.393282	0.701674	0.482882	0.66761	0.182	0.139
ENSMUSG00000041303	Gtf3c3	2245.99	-0.105751	0.185967	-0.568654	0.569591	0.737206	10.341	10.456
ENSMUSG00000073678	Pgap1	1412.62	-0.311967	0.173578	-1.79727	0.0722922	0.190817	3.186	3.679
ENSMUSG00000052331	Ankrd44	775.306	-0.676753	0.226794	-2.98399	0.00284513	0.0163022	0.517	0.783
ENSMUSG00000025982	Sf3b1	13512.2	0.0174122	0.190812	0.0912536	0.927291	0.962448	69.557	64.825
ENSMUSG00000103030	E330011M16Rik	5.53789	0.607947	0.761076	0.7988	0.424406	0.619165	0.772	0.477
ENSMUSG00000025981	Coq10b	905.449	0.855826	0.391222	2.18757	0.0287008	0.09673	9.357	4.884
ENSMUSG00000025980	Hspd1	7197.55	0.0372023	0.205423	0.181101	0.856289	0.923213	140.665	128.792
ENSMUSG00000073676	Hspe1	1163.93	0.46578	0.201253	2.3144	0.0206456	0.0755413	87.786	59.712
ENSMUSG00000089670	Gm16581	4.70818	-1.38734	0.92499	-1.49984	0.133656	0.292233	0.49	1.208
ENSMUSG00000025979	Mob4	2016.11	0.108252	0.154998	0.698409	0.484922	0.669599	18.323	15.969
ENSMUSG00000025978	Rftn2	120.641	1.09659	0.513275	2.13646	0.0326422	0.106491	0.539	0.232
ENSMUSG00000097649	Gm10561	11.765	1.04909	0.774881	1.35387	0.175779	0.351516	0.324	0.144
ENSMUSG00000046994	Mars2	613.03	0.441461	0.159767	2.76315	0.00572463	0.0281175	13.432	9.242
ENSMUSG00000025977	Boll	60.1392	-2.4126	0.647083	-3.72843	0.00019268	0.00180093	0.043	0.214
ENSMUSG00000100215	Gm8292	25.3035	-0.106487	0.482891	-0.22052	0.825466	0.905696	13.959	14.129
ENSMUSG00000038349	Plcl1	2325.36	-0.202699	0.392849	-0.515971	0.605875	0.764205	1.113	1.209
ENSMUSG00000100309	Gm6644	7.11909	2.04947	0.843528	2.42964	0.0151137	0.0592827	2.111	0.478
ENSMUSG00000099950	9130227L01Rik	2.97603	2.21406	1.43117	1.54703	0.121856	0.274916	0.037	0.007
ENSMUSG00000038331	Satb2	92.2732	2.44504	0.869721	2.8113	0.00493424	0.0252114	0.249	0.042
ENSMUSG00000087022	9130024F11Rik	27.4962	4.87424	1.16927	4.16863	3.06435e-05	0.000387644	0.215	0.007
ENSMUSG00000101429	BC055402	3.24598	0.371086	1.29661	0.286197	0.774727	0.878308	0.077	0.056
ENSMUSG00000097519	4930558J18Rik	41.4064	-0.451784	0.384276	-1.17568	0.239725	0.433185	0.458	0.587
ENSMUSG00000038323	1700066M21Rik	350.244	0.29147	0.230805	1.26284	0.206647	0.393162	11.757	8.99
ENSMUSG00000048495	Tyw5	290.76	0.156269	0.146899	1.06378	0.287427	0.486444	3.546	2.978
ENSMUSG00000025971	Maip1	615.202	0.244681	0.132844	1.84186	0.0654953	0.177738	12.698	10.068
ENSMUSG00000038305	Spats2l	243.888	-0.992306	0.435058	-2.28086	0.0225569	0.0805051	0.229	0.422
ENSMUSG00000091283	Gm17234	3.55191	0.436849	1.25348	0.34851	0.727457	0.846833	0.124	0.087
ENSMUSG00000054770	Kctd18	396.001	0.460257	0.161971	2.84161	0.00448869	0.0234321	1.602	1.091
ENSMUSG00000026039	Sgo2a	1668.06	-0.362929	0.353467	-1.02677	0.304529	0.504875	12.155	14.66
ENSMUSG00000063558	Aox1	76.0143	-0.419656	0.422523	-0.993215	0.320605	0.520919	0.144	0.178
ENSMUSG00000064294	Aox3	64.8563	-3.48396	0.63584	-5.4793	4.27023e-08	1.36886e-06	0.021	0.217
ENSMUSG00000038242	Aox4	3.19575	3.12055	2.13209	1.46361	0.143301	0.306522	0.032	0.003
ENSMUSG00000079554	Aox2	6.69371	-3.40175	1.10525	-3.0778	0.00208536	0.0127523	0.003	0.028
ENSMUSG00000103839	Gm37607	34.9639	-0.00498427	0.39826	-0.0125151	0.990015	0.99463	2.978	2.77
ENSMUSG00000051223	Bzw1	7161.61	-0.187316	0.0929343	-2.01558	0.0438442	0.132065	102.509	109.518
ENSMUSG00000026034	Clk1	1809.59	0.285388	0.180353	1.58238	0.113562	0.261324	32.337	25.077
ENSMUSG00000026035	Ppil3	317.209	-0.145524	0.208053	-0.699457	0.484267	0.668782	4.255	4.406
ENSMUSG00000026036	Nif3l1	893.965	0.172152	0.195548	0.880357	0.378666	0.578399	5.432	4.526
ENSMUSG00000026037	Orc2	1138.5	0.626413	0.158754	3.94581	7.95302e-05	0.000875865	7.208	4.386
ENSMUSG00000085054	Gm15834	98.0144	0.477168	0.319007	1.49579	0.134708	0.293611	1.43	0.968
ENSMUSG00000038174	Fam126b	3012.05	0.539444	0.356048	1.51509	0.12975	0.286486	11.1	7.11
ENSMUSG00000026032	Ndufb3	1297.57	0.222773	0.159904	1.39317	0.163569	0.334867	29.724	23.902
ENSMUSG00000059647	Cbx3-ps7	11.8492	0.117011	0.694603	0.168457	0.866224	0.929008	4.524	3.985
ENSMUSG00000047528	Flacc1	3.09113	-0.21317	1.12867	-0.188868	0.850196	0.919771	0.013	0.014
ENSMUSG00000102059	Gm20257	11.4023	1.96664	0.609284	3.22779	0.00124749	0.00842353	1.368	0.328
ENSMUSG00000026031	Cflar	1674.82	-0.272451	0.249666	-1.09126	0.275158	0.472947	5.828	6.585
ENSMUSG00000026029	Casp8	104.869	-0.0678299	0.272806	-0.248638	0.803641	0.892733	0.419	0.409
ENSMUSG00000099719	Gm28802	7.39972	0.147054	0.811133	0.181295	0.856136	0.923204	0.042	0.035
ENSMUSG00000026028	Trak2	12466.2	0.0895796	0.218557	0.409868	0.681903	0.817485	43.259	37.893
ENSMUSG00000026027	Stradb	567.617	-0.14765	0.176479	-0.836643	0.402793	0.599606	5.167	5.386
ENSMUSG00000072295	C2cd6	40.5577	0.0345402	0.428519	0.0806035	0.935757	0.967035	0.078	0.072
ENSMUSG00000038079	Tmem237	2621.73	0.240167	0.126228	1.90265	0.0570861	0.16036	32.737	25.98
ENSMUSG00000097573	G730003C15Rik	95.5116	-0.0399176	0.266284	-0.149906	0.880839	0.937094	9.86	9.52
ENSMUSG00000079550	Mpp4	10468.4	0.816446	0.311482	2.62117	0.00876289	0.0390078	51.075	27.095
ENSMUSG00000101586	Gm29017	22.7657	0.485324	0.469187	1.03439	0.300953	0.501761	0.254	0.169
ENSMUSG00000026024	Als2	2759.92	0.0225365	0.129917	0.173469	0.862283	0.926987	8.046	7.404
ENSMUSG00000026023	Cdk15	4.66038	1.13384	1.46139	0.775866	0.437828	0.630326	0.018	0.007
ENSMUSG00000041075	Fzd7	270.958	-1.88129	0.260272	-7.22817	4.89555e-13	5.16079e-11	4.724	16.29
ENSMUSG00000047361	Gm973	120.674	-0.24935	0.581928	-0.428489	0.668295	0.80811	0.136	0.149
ENSMUSG00000026021	Sumo1	2246.43	0.126958	0.160615	0.790451	0.429265	0.62359	5.988	5.148
ENSMUSG00000101400	Gm29596	1.87751	1.69424	1.70712	0.992454	0.320976	NA	1.624	0.481
ENSMUSG00000026020	Nop58	4359.66	0.109857	0.205768	0.533888	0.593419	0.75551	29.005	25.309
ENSMUSG00000067336	Bmpr2	5292	0.0394804	0.217898	0.181188	0.85622	0.923213	8.592	7.797
ENSMUSG00000041040	Fam117b	2539.91	-0.0299916	0.215834	-0.138957	0.889484	0.942034	7.236	6.961
ENSMUSG00000026018	Ica1l	321.894	0.841732	0.377892	2.22744	0.0259179	0.0894128	1.46	0.761
ENSMUSG00000026019	Wdr12	1023.85	0.020203	0.18746	0.107772	0.914176	0.955056	7.246	6.662
ENSMUSG00000026017	Carf	1093.98	-0.11214	0.170097	-0.65927	0.509722	0.689864	4.054	4.104
ENSMUSG00000073664	Nbeal1	2160.75	-0.196084	0.193091	-1.0155	0.309868	0.510004	2.538	2.721
ENSMUSG00000049439	Cyp20a1	616.556	-0.089528	0.1473	-0.607795	0.543324	0.716628	2.897	2.877
ENSMUSG00000026782	Abi2	4036.69	0.0695771	0.126193	0.551354	0.581391	0.746224	12.987	11.55
ENSMUSG00000026014	Raph1	935.633	-0.263955	0.261421	-1.00969	0.312642	0.512963	2.232	2.49
ENSMUSG00000082160	Gm11578	9.98119	0.726384	0.753173	0.964432	0.334829	0.535045	6.454	3.59
ENSMUSG00000101188	Eif4a-ps4	2636.96	0.197865	0.331126	0.597552	0.550139	0.721408	486.483	398.982
ENSMUSG00000026012	Cd28	7.20975	0.4015	0.905211	0.443543	0.657373	0.800844	0.029	0.021
ENSMUSG00000026011	Ctla4	3.6627	2.45806	1.53636	1.59993	0.109615	0.255004	0.06	0.011
ENSMUSG00000026009	Icos	3.17903	2.68607	1.36693	1.96503	0.0494104	0.144523	0.059	0.009
ENSMUSG00000100893	Gm28083	2.95939	0.557607	1.25609	0.443922	0.657099	0.800602	0.1	0.063
ENSMUSG00000085248	Gm11587	29.0184	1.32439	0.515653	2.56838	0.0102174	0.0439143	1.117	0.416
ENSMUSG00000085447	9530026F06Rik	1.9663	-1.25789	1.69076	-0.743976	0.456891	NA	0.008	0.018
ENSMUSG00000052062	Pard3b	749.706	0.590287	0.33825	1.74512	0.0809642	0.207417	0.161	0.099
ENSMUSG00000085400	Pard3bos3	1.12024	0.513393	1.77065	0.289946	0.771857	NA	0.005	0.003
ENSMUSG00000025969	Nrp2	4130.87	-1.05547	0.359733	-2.93403	0.00334589	0.0185884	5.385	10.528
ENSMUSG00000100811	Gm29083	1.61038	0.746324	1.66244	0.448933	0.65348	NA	0.103	0.057
ENSMUSG00000100426	Gm4208	4.0826	-3.99193	1.37148	-2.91068	0.00360647	0.0197789	0.013	0.191
ENSMUSG00000040865	Ino80d	1486.79	0.0482681	0.151545	0.318507	0.7501	0.862205	2.056	1.858
ENSMUSG00000084799	Ino80dos	318.05	-0.0527166	0.196591	-0.268153	0.788581	0.88632	1.423	1.387
ENSMUSG00000025968	Ndufs1	3784.06	0.32571	0.179271	1.81686	0.0692383	0.184819	25.384	18.976
ENSMUSG00000025967	Eef1b2	5477.61	0.236363	0.328082	0.720439	0.471255	0.658669	367.429	292.102
ENSMUSG00000046856	Gpr1	1.33853	3.04347	1.84426	1.65023	0.0988949	NA	0.02	0.002
ENSMUSG00000027520	Zdbf2	273.516	0.329462	0.892215	0.369263	0.711932	0.837086	1.442	1.063
ENSMUSG00000081643	Gm11605	16.7139	-0.464224	0.510787	-0.908839	0.363435	0.563874	4.509	5.795
ENSMUSG00000025964	Adam23	187.009	3.55404	0.862363	4.12129	3.76763e-05	0.000462796	0.626	0.049
ENSMUSG00000069085	Dytn	2.7255	1.93009	1.3672	1.41172	0.158034	0.327361	0.013	0.003
ENSMUSG00000025963	Mdh1b	86.2333	0.154948	0.431441	0.35914	0.71949	0.841676	0.464	0.392
ENSMUSG00000025962	Fastkd2	590.26	0.341651	0.167371	2.04127	0.0412235	0.126099	6.121	4.531
ENSMUSG00000044689	Gm13749	2.88324	1.22967	1.33446	0.921472	0.356804	0.556971	0.146	0.059
ENSMUSG00000025959	Klf7	818.724	-0.366086	0.141923	-2.57947	0.00989516	0.0428326	1.708	2.065
ENSMUSG00000086836	Gm13748	14.1778	-0.8923	0.712399	-1.25253	0.210377	0.398186	0.189	0.338
ENSMUSG00000101895	Gm28981	9.72263	0.326518	0.860436	0.379479	0.704332	0.832533	0.017	0.013
ENSMUSG00000025958	Creb1	4761.26	-0.308926	0.173673	-1.77878	0.0752753	0.19689	12.026	13.93
ENSMUSG00000025956	Mettl21a	451.761	0.335214	0.246729	1.35864	0.174262	0.349398	9.709	7.249
ENSMUSG00000101832	Gm28982	25.5659	1.06111	0.514966	2.06054	0.0393466	0.121948	0.899	0.408
ENSMUSG00000087213	2810408I11Rik	90.2994	-0.227837	0.349525	-0.651848	0.514499	0.693879	1.885	2.078
ENSMUSG00000070871	Ccnyl1	515.385	0.222881	0.161684	1.3785	0.168049	0.341301	3.615	2.9
ENSMUSG00000045005	Fzd5	177.207	-0.166438	0.270912	-0.614361	0.538977	0.713106	5.048	5.276
ENSMUSG00000102140	Gm38058	3.74205	-0.356886	1.01081	-0.353068	0.724037	0.844478	0.207	0.251
ENSMUSG00000051344	Plekhm3	1132.92	0.121645	0.210707	0.577319	0.563724	0.732222	1.391	1.197
ENSMUSG00000084416	Rpl10a-ps1	663.197	-0.305924	0.277931	-1.10072	0.271018	0.468172	196.043	226.793
ENSMUSG00000100774	Gm7329	1.68827	-3.54318	2.04623	-1.73156	0.083352	NA	0.325	3.951
ENSMUSG00000044816	D630023F18Rik	2.02667	3.08935	1.922	1.60736	0.107975	0.252497	0.061	0.007
ENSMUSG00000025950	Idh1	2372.62	-0.537276	0.160269	-3.35235	0.0008013	0.005875	13.955	18.874
ENSMUSG00000025949	Pikfyve	2240.82	0.279241	0.152777	1.82777	0.0675842	0.181895	5.524	4.258
ENSMUSG00000025946	Pth2r	6.59827	0.522458	0.717406	0.72826	0.466454	0.654853	0.017	0.011
ENSMUSG00000015222	Map2	37887.1	-0.0410561	0.217466	-0.188794	0.850255	0.919771	26.425	25.433
ENSMUSG00000073656	Gm10558	27.0756	1.51	1.05363	1.43314	0.151818	0.318818	0.526	0.175
ENSMUSG00000055567	Unc80	7075.84	0.18273	0.259374	0.704504	0.481119	0.666433	5.925	4.854
ENSMUSG00000026005	Rpe	852.802	0.253529	0.188488	1.34507	0.178603	0.355778	10.174	7.931
ENSMUSG00000026004	Kansl1l	2793.45	-0.405744	0.268984	-1.50843	0.131443	0.288946	5.124	6.337
ENSMUSG00000102776	Gm38162	7.7569	0.0421052	0.783813	0.0537184	0.957159	0.978211	0.346	0.314
ENSMUSG00000082057	Gm15789	2.62417	1.60893	1.20637	1.33369	0.182305	0.361015	0.328	0.099
ENSMUSG00000103553	Gm38218	4.80949	-1.39968	1.00718	-1.3897	0.16462	0.336205	0.103	0.256
ENSMUSG00000026003	Acadl	637.343	-0.482724	0.321547	-1.50126	0.133289	0.291643	2.066	2.678
ENSMUSG00000061816	Myl1	2.90346	-0.765641	1.29151	-0.592827	0.553297	0.723915	0.023	0.037
ENSMUSG00000026000	Lancl1	1421.87	0.316208	0.153503	2.05994	0.0394043	0.122067	8.445	6.346
ENSMUSG00000025991	Cps1	2.20145	0.927677	2.0564	0.451118	0.651905	0.79719	0.004	0.002
ENSMUSG00000062209	Erbb4	3770.9	-3.65253	0.599598	-6.09163	1.11764e-09	5.43159e-08	0.096	1.119
ENSMUSG00000100354	Gm29113	1.66933	-3.0652	1.84796	-1.65869	0.097178	NA	0.02	0.171
ENSMUSG00000101156	Gm29114	1.16366	-1.52753	1.82815	-0.835562	0.403401	NA	0.004	0.011
ENSMUSG00000025997	Ikzf2	1133.55	-0.426618	0.259313	-1.64519	0.0999314	0.239016	1.217	1.525
ENSMUSG00000053153	Spag16	82.8584	-0.376382	0.783224	-0.480555	0.630833	0.782503	0.019	0.024
ENSMUSG00000045648	Vwc2l	28.8116	5.65776	1.12567	5.02615	5.00422e-07	1.18078e-05	0.109	0.002
ENSMUSG00000026196	Bard1	759.301	-0.413802	0.287992	-1.43685	0.15076	0.317225	2.183	2.714
ENSMUSG00000050296	Abca12	1.68042	-0.315774	1.62131	-0.194765	0.845577	NA	0.002	0.003
ENSMUSG00000026192	Atic	1371.83	0.180501	0.254356	0.709638	0.477929	0.664142	13.842	11.525
ENSMUSG00000026193	Fn1	3909.26	0.0812719	0.597245	0.136078	0.89176	0.942936	10.459	9.136
ENSMUSG00000073652	Apol7d	1.39846	-0.585293	1.47337	-0.397247	0.691185	NA	0.028	0.038
ENSMUSG00000101834	Gm5829	2.70834	2.16171	1.64338	1.3154	0.188375	0.369205	2.566	0.546
ENSMUSG00000101211	Gm28818	1.1414	-0.292617	1.84013	-0.15902	0.873653	NA	0.012	0.014
ENSMUSG00000101848	4933417E11Rik	2.79865	0.383838	1.68669	0.227569	0.819982	0.902144	0.02	0.015
ENSMUSG00000101496	Gm8885	51.5056	-0.600809	0.42424	-1.4162	0.156717	0.325621	14.473	20.435
ENSMUSG00000102123	Gm4319	1.55	1.49011	1.6594	0.897979	0.369197	NA	0.037	0.013
ENSMUSG00000039395	Mreg	984.568	1.51586	0.516282	2.93612	0.00332349	0.0184931	4.818	1.606
ENSMUSG00000094655	Gm25360	2730.63	-0.0158794	0.625091	-0.0254033	0.979733	0.988833	3464.97	3284.28
ENSMUSG00000094050	Gm23472	931.16	-2.2685	0.596	-3.8062	0.000141117	0.0013966	371.271	1671.4
ENSMUSG00000093956	Gm24497	498.986	-0.764264	0.354265	-2.15733	0.0309803	0.102709	421.975	676.94
ENSMUSG00000093843	Gm25939	1797.49	0.463545	0.479049	0.967636	0.333226	0.53365	1722.4	1171.69
ENSMUSG00000026189	Pecr	131.781	0.268607	0.355145	0.756331	0.449451	0.640663	1.118	0.879
ENSMUSG00000026188	Tmem169	76.2986	2.17108	0.276289	7.858	3.90325e-15	6.51227e-13	1.698	0.354
ENSMUSG00000026187	Xrcc5	1461.83	0.155099	0.276847	0.560233	0.57532	0.741152	3.347	2.848
ENSMUSG00000039372	Marchf4	78.0875	1.54612	0.544376	2.84017	0.00450896	0.023509	0.158	0.051
ENSMUSG00000039354	Smarcal1	1868.38	-0.128232	0.204023	-0.628516	0.529666	0.705312	6.518	6.645
ENSMUSG00000110712	Gm39662	9.15562	-0.837012	1.14794	-0.72914	0.465916	0.654358	0.585	1.006
ENSMUSG00000046330	Rpl37a	7367.31	0.0967639	0.234553	0.412546	0.679939	0.81669	692.521	607.749
ENSMUSG00000039323	Igfbp2	1670.1	-2.00719	0.41517	-4.83463	1.33392e-06	2.72823e-05	6.072	22.696
ENSMUSG00000026185	Igfbp5	1755.28	-1.62442	0.386457	-4.20338	2.62962e-05	0.000340581	6.799	19.064
ENSMUSG00000101968	1700027A15Rik	1.31219	1.86628	1.85266	1.00735	0.313766	NA	0.007	0.002
ENSMUSG00000099877	Pinc	2.05286	0.692181	2.01853	0.342912	0.731664	0.849818	0.02	0.012
ENSMUSG00000100301	6030407O03Rik	25.4005	-0.624734	0.680604	-0.917912	0.358665	0.558682	0.017	0.025
ENSMUSG00000055322	Tns1	394.462	-0.291592	0.251768	-1.15818	0.246791	0.441773	0.301	0.34
ENSMUSG00000061815	Rufy4	1.58576	1.03708	1.73404	0.59807	0.549793	NA	0.018	0.008
ENSMUSG00000026180	Cxcr2	2.73251	0.572347	1.78125	0.321318	0.747969	0.860886	0.029	0.017
ENSMUSG00000006304	Arpc2	2243.64	0.368152	0.14448	2.54812	0.0108305	0.0458789	16.796	12.241
ENSMUSG00000064272	Gpbar1	2.23045	1.18574	1.63114	0.726937	0.467265	0.6556	0.647	0.257
ENSMUSG00000006299	Aamp	3496.82	-0.128851	0.144988	-0.888705	0.374162	0.574002	141.894	145.613
ENSMUSG00000026179	Pnkd	580.889	0.57846	0.145477	3.9763	6.99952e-05	0.000784309	2.193	1.379
ENSMUSG00000006301	Tmbim1	277.475	0.981823	0.268432	3.65762	0.000254567	0.00226734	4.295	2.056
ENSMUSG00000073650	Catip	21.5714	-0.698923	0.903596	-0.77349	0.439232	0.631961	0.425	0.651
ENSMUSG00000026177	Slc11a1	179.337	-0.0603985	0.302783	-0.199478	0.841889	0.915326	3.718	3.664
ENSMUSG00000026176	Ctdsp1	340.52	-0.11275	0.146355	-0.770382	0.441073	0.633448	12.053	12.194
ENSMUSG00000026175	Vil1	7.02326	0.758142	0.836101	0.906758	0.364535	0.564744	0.089	0.049
ENSMUSG00000033364	Usp37	3364.12	-0.146553	0.194761	-0.752477	0.451764	0.642488	6.467	6.733
ENSMUSG00000026174	Cnot9	1763.42	0.0030778	0.209569	0.0146863	0.988282	0.993276	16.604	15.567
ENSMUSG00000026173	Plcd4	54.0088	2.10481	0.60392	3.48526	0.000491668	0.00389602	0.841	0.18
ENSMUSG00000026135	Zfp142	483.992	0.136169	0.149551	0.910518	0.362549	0.562953	4.57	3.884
ENSMUSG00000026172	Bcs1l	358.551	0.640171	0.213966	2.99193	0.00277223	0.015997	21.378	12.823
ENSMUSG00000026171	Rnf25	560.515	0.40904	0.147505	2.77306	0.00555315	0.0275177	18.731	13.233
ENSMUSG00000033276	Stk36	208.624	-0.356381	0.239167	-1.49009	0.1362	0.295824	1.109	1.323
ENSMUSG00000033257	Ttll4	1534.53	0.118283	0.14606	0.809826	0.41804	0.61385	8.516	7.325
ENSMUSG00000026170	Cyp27a1	26.8584	0.775882	0.440139	1.76281	0.0779324	0.201847	0.245	0.135
ENSMUSG00000033227	Wnt6	7.25962	-2.3748	0.885136	-2.68297	0.00729709	0.0337668	0.031	0.149
ENSMUSG00000026167	Wnt10a	102.438	-0.409733	0.796211	-0.514603	0.60683	0.765091	1.53	1.85
ENSMUSG00000089964	Gm16582	54.1249	2.04266	0.758637	2.69255	0.00709087	0.0330362	0.684	0.151
ENSMUSG00000006546	Cryba2	7.67455	4.92567	1.55995	3.15758	0.00159083	0.0102488	1.302	0.039
ENSMUSG00000047021	Cfap65	46.9141	-1.89451	0.774075	-2.44745	0.0143871	0.0569822	0.124	0.43
ENSMUSG00000006538	Ihh	4.74505	-0.48601	0.826597	-0.587965	0.556556	0.72634	0.142	0.185
ENSMUSG00000026162	Nhej1	66.6971	-0.503497	0.29282	-1.71948	0.0855275	0.215205	0.075	0.099
ENSMUSG00000026205	Slc23a3	3.67648	0.536736	1.02699	0.52263	0.601231	0.760748	0.148	0.095
ENSMUSG00000033159	Cnppd1	908.226	0.0799262	0.169538	0.471436	0.637329	0.786647	25.442	22.712
ENSMUSG00000049339	Retreg2	2627.71	0.322456	0.150085	2.14848	0.0316754	0.104478	115.401	86.2
ENSMUSG00000026197	Zfand2b	138.922	-0.132261	0.218365	-0.605685	0.544724	0.717171	9.686	9.948
ENSMUSG00000033124	Atg9a	665.687	0.339833	0.18886	1.7994	0.0719558	0.190208	13.353	9.802
ENSMUSG00000026199	Ankzf1	404.855	-0.0219256	0.164512	-0.133277	0.893975	0.944149	12.697	12.132
ENSMUSG00000026200	Glb1l	230.922	-0.144928	0.18973	-0.763864	0.444948	0.636781	3.842	3.982
ENSMUSG00000026201	Stk16	633.808	0.291081	0.194203	1.49885	0.133913	0.292555	30.58	23.167
ENSMUSG00000026202	Tuba4a	643.902	3.7275	0.633242	5.88636	3.94783e-09	1.70368e-07	41.701	2.86
ENSMUSG00000096094	A630095N17Rik	1.15414	0.216765	2.13071	0.101734	0.918968	NA	0.029	0.023
ENSMUSG00000026203	Dnajb2	372.471	1.90752	0.395454	4.82363	1.40969e-06	2.83935e-05	8.399	2.082
ENSMUSG00000026204	Ptprn	834.602	3.51584	0.328085	10.7162	8.54187e-27	6.96129e-24	19.167	1.588
ENSMUSG00000033061	Resp18	45.1123	5.97237	1.14081	5.23521	1.64796e-07	4.43692e-06	4.423	0.065
ENSMUSG00000026209	Dnpep	1727.14	0.00470109	0.169849	0.0276781	0.977919	0.987802	37.169	34.571
ENSMUSG00000026208	Des	28.2109	0.528977	0.484137	1.09262	0.274561	0.472381	0.874	0.558
ENSMUSG00000085653	Gm15179	2.39704	-0.0198196	1.75473	-0.0112949	0.990988	0.995217	0.02	0.019
ENSMUSG00000026207	Speg	1507.52	0.80269	0.301308	2.66402	0.00772129	0.0353209	6.108	3.236
ENSMUSG00000033021	Gmppa	471.648	0.0503213	0.23569	0.213507	0.830932	0.908963	12.858	11.568
ENSMUSG00000033007	Asic4	712.314	2.9132	0.568186	5.12719	2.94092e-07	7.40965e-06	9.097	1.116
ENSMUSG00000032997	Chpf	885.872	1.0228	0.153699	6.65454	2.84191e-11	2.08364e-09	49.333	22.685
ENSMUSG00000026211	Obsl1	658.583	-0.000256692	0.268904	-0.000954586	0.999238	0.999645	5.359	4.975
ENSMUSG00000051703	Tmem198	236.324	1.2552	0.220587	5.69027	1.26838e-08	4.74836e-07	11.852	4.62
ENSMUSG00000032968	Inha	73.2194	1.10193	0.404095	2.7269	0.00639329	0.0305864	7.231	3.14
ENSMUSG00000082745	Gm15181	2.07181	-1.48781	1.71299	-0.868548	0.385095	0.58397	1.563	4.02
ENSMUSG00000026213	Stk11ip	582.043	0.408574	0.176847	2.31033	0.02087	0.0761781	9.315	6.538
ENSMUSG00000006576	Slc4a3	437.879	2.36179	0.256445	9.20973	3.26948e-20	1.30711e-17	11.01	1.994
ENSMUSG00000026235	Epha4	426.543	1.57166	0.728538	2.15728	0.0309837	0.102709	1.126	0.344
ENSMUSG00000102052	Gm28387	2.67374	-3.65012	1.60839	-2.26942	0.0232426	0.0824108	0.002	0.03
ENSMUSG00000004872	Pax3	560.783	-4.60567	0.478805	-9.6191	6.641e-22	3.60811e-19	0.108	2.464
ENSMUSG00000118426	Gm2102	1.58458	2.74252	2.02621	1.35353	0.175888	NA	0.656	0.089
ENSMUSG00000032908	Sgpp2	1400.79	0.984723	0.175114	5.62332	1.87327e-08	6.62651e-07	3.163	1.504
ENSMUSG00000099561	Gm28410	1.07564	0.73809	2.11667	0.348703	0.727312	NA	0.014	0.008
ENSMUSG00000026245	Farsb	2021.53	-0.0528623	0.161445	-0.327432	0.743341	0.857879	5.689	5.525
ENSMUSG00000090486	BC035947	5.43114	5.09956	1.52136	3.35198	0.000802364	0.00588076	0.087	0
ENSMUSG00000012187	Mogat1	443.629	2.609	0.690324	3.77938	0.000157217	0.00153304	2.706	0.424
ENSMUSG00000032883	Acsl3	2295.1	0.130294	0.220288	0.591474	0.554203	0.724564	11.015	9.355
ENSMUSG00000099377	Gm6159	6.13442	-0.0144546	0.827463	-0.0174686	0.986063	0.992244	0.683	0.645
ENSMUSG00000099706	Gm29536	22.1957	-1.42654	0.54625	-2.61152	0.00901394	0.0398644	0.007	0.018
ENSMUSG00000047330	Kcne4	32.5684	-1.87889	0.797193	-2.35688	0.0184294	0.0692804	0.867	2.973
ENSMUSG00000050711	Scg2	2197.97	-0.326418	0.659148	-0.495211	0.620451	0.774933	65.318	74.604
ENSMUSG00000054702	Ap1s3	11.955	1.15263	0.666804	1.7286	0.0838815	0.212451	0.063	0.026
ENSMUSG00000073643	Wdfy1	1727.62	-0.715492	0.622097	-1.15013	NA	NA	4.532	6.972
ENSMUSG00000026248	Mrpl44	574.795	0.393624	0.14538	2.70755	0.00677818	0.0319375	25.574	18.253
ENSMUSG00000026249	Serpine2	1355.48	0.134939	0.253422	0.532468	0.594402	0.756201	4.143	3.472
ENSMUSG00000067106	Gm5529	7.2027	0.681535	0.713871	0.954704	0.339727	0.539859	2.168	1.27
ENSMUSG00000100397	Gm28071	6.70237	0.565935	0.868403	0.651696	0.514597	0.693879	3.919	2.509
ENSMUSG00000043230	Fam124b	3.04382	0.986805	1.17739	0.838127	0.401959	0.598827	0.056	0.026
ENSMUSG00000103404	Gm37932	1.79757	1.58288	1.74842	0.905324	0.365294	NA	0.591	0.185
ENSMUSG00000004364	Cul3	7163.77	0.26235	0.145831	1.799	0.0720182	0.190297	20.657	16.045
ENSMUSG00000101722	Gm29125	20.4373	0.0429672	0.752526	0.0570973	0.954468	0.976787	0.401	0.363
ENSMUSG00000090637	Gm6189	2.51491	3.5426	1.68112	2.10728	0.0350932	0.112461	0.432	0.032
ENSMUSG00000101483	1700016L21Rik	28.8852	2.0426	0.685006	2.98187	0.00286496	0.0163937	0.181	0.04
ENSMUSG00000038608	Dock10	443.621	-0.452682	0.244785	-1.84931	0.0644133	0.17577	0.319	0.407
ENSMUSG00000054976	Nyap2	966.82	1.22172	0.558134	2.18893	0.0286016	0.0964878	0.719	0.287
ENSMUSG00000087008	Gm5530	2.71863	1.09933	1.18092	0.930911	0.3519	0.552367	0.776	0.346
ENSMUSG00000055980	Irs1	31206.7	-0.882431	0.318673	-2.76908	0.00562156	0.0277811	75.764	131.687
ENSMUSG00000022591	Gm9747	12.0383	-2.66864	0.78348	-3.40614	0.000658887	0.00498791	0.27	1.644
ENSMUSG00000026142	Rhbdd1	675.979	0.0932307	0.200911	0.46404	0.642619	0.790873	1.105	0.972
ENSMUSG00000100786	Gm28940	4.64879	5.01181	1.72783	2.90064	0.00372398	0.0203055	0.244	0.006
ENSMUSG00000067158	Col4a4	19.5123	-0.999922	0.633801	-1.57766	0.114644	0.263144	0.022	0.041
ENSMUSG00000079465	Col4a3	32.6237	-2.19981	0.718051	-3.06358	0.00218706	0.0132556	0.022	0.095
ENSMUSG00000097564	C430014B12Rik	11.0641	0.474312	0.553485	0.856956	0.391469	0.589038	0.083	0.056
ENSMUSG00000026150	Mff	2429.54	0.342201	0.183086	1.86908	0.0616119	0.16992	20.523	15.158
ENSMUSG00000026159	Agfg1	2112.36	0.205811	0.124184	1.65731	0.097456	0.235032	7.97	6.47
ENSMUSG00000101784	Gm7553	2.12973	1.88091	1.46299	1.28566	0.198562	0.382674	0.532	0.134
ENSMUSG00000038496	Slc19a3	14.8939	1.18089	0.657573	1.79583	0.0725215	0.191246	0.17	0.069
ENSMUSG00000053161	Daw1	9.88734	-1.52757	1.44427	-1.05768	0.290203	0.489426	0.022	0.061
ENSMUSG00000026163	Sphkap	14250.7	0.291269	0.412137	0.706731	0.479734	0.665206	12.98	10.075
ENSMUSG00000100580	4933436I20Rik	5.89683	1.36951	1.12516	1.21717	0.22354	0.414336	0.006	0.002
ENSMUSG00000045658	Pid1	494.952	-0.76877	0.313571	-2.45166	0.01422	0.0565027	0.211	0.332
ENSMUSG00000036766	Dner	356.549	1.81854	0.497749	3.65352	0.000258667	0.00229614	0.392	0.102
ENSMUSG00000026219	Trip12	10067.6	-0.0690565	0.150489	-0.458882	0.646319	0.793435	16.538	16.243
ENSMUSG00000073633	Fbxo36	252.189	-0.172982	0.218124	-0.793043	0.427753	0.622204	0.787	0.83
ENSMUSG00000026220	Slc16a14	22.5636	0.0222307	0.453836	0.048984	0.960932	0.979544	0.227	0.208
ENSMUSG00000118590	AC167036.1	1.86081	0.352644	1.42908	0.246764	0.805091	NA	0.062	0.046
ENSMUSG00000052477	C130026I21Rik	16.595	1.43307	0.573529	2.49869	0.0124653	0.0511882	0.019	0.006
ENSMUSG00000064281	Rpl19-ps1	5.63283	0.467045	0.942134	0.495731	0.620084	0.774639	2.469	1.681
ENSMUSG00000072109	A530040E14Rik	7.40713	5.68399	1.40076	4.05779	4.95394e-05	0.000583161	0.481	0.008
ENSMUSG00000089716	Gm6264	4.40307	3.88786	1.38611	2.80488	0.00503351	0.0255645	0.062	0.004
ENSMUSG00000079455	Gm16026	8.80838	3.39065	0.932084	3.63771	0.000275076	0.00240553	0.232	0.02
ENSMUSG00000091199	Gm2619	1.27122	3.95338	2.60562	1.51725	0.129203	NA	0.033	0
ENSMUSG00000070034	Sp110	53.7395	1.73305	0.501442	3.45613	0.000547995	0.00426578	0.778	0.219
ENSMUSG00000070031	Sp140	41.5128	0.958339	0.485838	1.97255	0.0485471	0.142751	0.227	0.11
ENSMUSG00000073628	Gm10552	1.69056	3.48201	1.76818	1.96926	0.0489237	NA	0.107	0.009
ENSMUSG00000026222	Sp100	72.4664	1.19782	0.45657	2.62352	0.00870252	0.0387862	0.288	0.118
ENSMUSG00000052760	A630001G21Rik	23.1415	-0.0842587	0.391833	-0.215038	0.829738	0.90822	0.072	0.071
ENSMUSG00000036707	Cab39	4402.98	0.214385	0.165231	1.29748	0.194466	0.377477	17.252	13.962
ENSMUSG00000026223	Itm2c	2694.7	0.650547	0.314202	2.07047	0.0384083	0.120141	49.763	29.037
ENSMUSG00000026224	4933407L21Rik	11.5477	-1.08791	0.838545	-1.29738	0.1945	0.377508	0.137	0.265
ENSMUSG00000049608	Gpr55	2.93439	2.27679	1.40863	1.61631	0.106027	0.24922	0.043	0.008
ENSMUSG00000099342	Gm18180	22.9772	0.31107	0.397876	0.781825	0.434317	0.627929	3.588	2.712
ENSMUSG00000026226	Spata3	1.14278	-0.144548	2.08535	-0.0693158	0.944738	NA	0.016	0.016
ENSMUSG00000026227	2810459M11Rik	68.4197	1.32981	0.717893	1.85238	0.0639711	0.174924	2.291	0.825
ENSMUSG00000026229	Psmd1	4388.57	0.0754884	0.143379	0.526496	0.598543	0.759041	12.409	11.038
ENSMUSG00000026228	Htr2b	19.1497	-0.897616	0.502525	-1.78621	0.0740652	0.194273	0.165	0.289
ENSMUSG00000094638	Gm21972	109.326	0.258358	0.217254	1.1892	0.234361	0.427356	0.819	0.643
ENSMUSG00000062590	Armc9	829.616	0.212731	0.185218	1.14855	0.250744	0.445984	1.515	1.218
ENSMUSG00000087538	Gm16341	2.99811	0.0582626	1.15383	0.0504948	0.959728	0.979297	0.03	0.027
ENSMUSG00000079445	B3gnt7	7.59954	1.55535	0.743075	2.09312	0.0363381	0.115452	0.665	0.212
ENSMUSG00000026234	Ncl	9652.21	-0.333641	0.223357	-1.49376	0.135239	0.294418	121.88	143.449
ENSMUSG00000073627	C130036L24Rik	91.2499	0.207737	0.275167	0.754947	0.450281	0.641493	1.614	1.306
ENSMUSG00000026237	Nmur1	2.15593	-0.433056	1.35276	-0.320127	0.748872	0.86126	0.01	0.013
ENSMUSG00000026238	Ptma	25328.7	-0.416179	0.284171	-1.46454	0.143047	0.306125	1338.69	1676.65
ENSMUSG00000026239	Pde6d	920.979	0.259691	0.230678	1.12577	0.260263	0.4563	4.654	3.605
ENSMUSG00000026240	Cops7b	379.136	0.481464	0.198558	2.4248	0.0153167	0.0599491	3.836	2.579
ENSMUSG00000103609	Gm37022	2.80403	0.635522	1.25664	0.505732	0.613045	0.769709	0.246	0.151
ENSMUSG00000026241	Nppc	33.2171	-0.928036	0.46184	-2.00943	0.0444916	0.133569	1.471	2.615
ENSMUSG00000053333	Dis3l2	1387.68	-0.0721045	0.159476	-0.452133	0.651173	0.796716	0.86	0.844
ENSMUSG00000084106	Gm6136	1692.1	-0.116993	0.248341	-0.471096	0.637572	0.786763	385.427	392.995
ENSMUSG00000099401	Gm28375	3.38453	-1.94158	1.24535	-1.55907	0.118979	0.270178	0.003	0.012
ENSMUSG00000026247	Ecel1	17.2169	2.83555	0.724781	3.91229	9.14242e-05	0.000975422	0.919	0.118
ENSMUSG00000036480	Prss56	1.06296	0.380464	1.87771	0.202622	0.839431	NA	0.068	0.049
ENSMUSG00000026254	Eif4e2	1728.52	0.127206	0.192533	0.660698	0.508806	0.689519	15.054	12.906
ENSMUSG00000026255	Efhd1	44.4478	0.739888	0.520342	1.42193	0.155048	0.323357	0.198	0.112
ENSMUSG00000048000	Gigyf2	2816.62	0.0855084	0.164226	0.520676	0.602592	0.761606	4.758	4.174
ENSMUSG00000079436	Kcnj13	99.873	-2.82323	1.76296	-1.60141	0.109285	0.25459	0.534	3.617
ENSMUSG00000026259	Ngef	761.116	2.24145	0.648271	3.45758	0.000545044	0.00425108	1.292	0.247
ENSMUSG00000079434	Neu2	39.4	0.82443	0.661321	1.24664	0.21253	0.400755	0.045	0.023
ENSMUSG00000026288	Inpp5d	227.365	1.05269	0.265522	3.96459	7.35224e-05	0.000818795	0.626	0.282
ENSMUSG00000026289	Atg16l1	1543.4	0.621329	0.300551	2.0673	0.0387061	0.120716	8.623	5.254
ENSMUSG00000056055	Sag	31477.9	0.643099	1.17777	0.546033	0.585043	0.748851	135.289	80.896
ENSMUSG00000070738	Dgkd	5903.38	-0.17052	0.237167	-0.718987	0.472149	0.659353	13.045	13.776
ENSMUSG00000101942	Gm19582	2.80107	0.368047	1.15487	0.31869	0.749961	0.862091	0.656	0.484
ENSMUSG00000005501	Usp40	1105.42	0.0531024	0.15457	0.34355	0.731185	0.849494	4.043	3.659
ENSMUSG00000092220	Gm20528	10.6318	-0.313534	0.764445	-0.410146	0.681699	0.817402	0.01	0.012
ENSMUSG00000079429	Mroh2a	3.70906	0.660863	1.06746	0.619098	0.535852	0.710612	0.031	0.019
ENSMUSG00000044783	Hjurp	12655.3	-0.319456	0.327884	-0.974295	0.32991	0.530746	177.818	209.329
ENSMUSG00000036251	Trpm8	11.5056	-0.422437	0.633308	-0.667032	0.504752	0.686117	0.022	0.027
ENSMUSG00000026295	Spp2	8.47551	-0.289842	0.968043	-0.29941	0.764627	0.871527	0.046	0.053
ENSMUSG00000099553	Gm29538	1.66302	-2.37584	2.08886	-1.13738	0.255378	NA	0.007	0.037
ENSMUSG00000062310	Glrp1	1.03394	0.483657	2.22918	0.216966	0.828234	NA	0.034	0.023
ENSMUSG00000049866	Arl4c	2527.89	-2.17067	0.341657	-6.35336	2.1066e-10	1.22515e-08	7.596	32.255
ENSMUSG00000036206	Sh3bp4	248.981	0.62386	0.353649	1.76406	0.0777213	0.201448	0.768	0.46
ENSMUSG00000055013	Agap1	5169.59	-0.843047	0.219839	-3.83484	0.000125647	0.00127568	1.693	2.829
ENSMUSG00000102009	4933400F21Rik	1.80779	-0.476447	1.29965	-0.366596	0.71392	NA	0.012	0.016
ENSMUSG00000067081	Asb18	3.85819	-0.0382565	0.926383	-0.0412966	0.967059	0.982833	0.015	0.014
ENSMUSG00000026301	Iqca	20.329	-1.80982	0.921935	-1.96307	0.0496384	0.144954	0.017	0.056
ENSMUSG00000044337	Ackr3	68.7984	-0.267206	0.387499	-0.689566	0.490467	0.673681	1.156	1.313
ENSMUSG00000034432	Cops8	1648.98	0.179715	0.111227	1.61576	0.106146	0.249405	35.057	29.002
ENSMUSG00000048126	Col6a3	498.314	0.466486	0.619887	0.752535	0.451729	0.642482	1.383	0.939
ENSMUSG00000026303	Mlph	25.8167	2.3074	0.86399	2.67063	0.00757085	0.0347829	0.282	0.055
ENSMUSG00000026305	Lrrfip1	355.833	0.890933	0.268638	3.31648	0.000911586	0.00649919	0.72	0.361
ENSMUSG00000034353	Ramp1	109.775	1.81073	0.545749	3.31789	0.000907008	0.00647309	0.947	0.246
ENSMUSG00000034343	Ube2f	612.135	0.433438	0.16201	2.67537	0.00746465	0.0343728	3.63	2.509
ENSMUSG00000083064	Gm7785	16.5211	2.27017	0.811827	2.79638	0.00516791	0.0260845	7.535	1.47
ENSMUSG00000026307	Scly	251.153	0.718831	0.248616	2.89133	0.00383611	0.0207302	2.958	1.667
ENSMUSG00000049515	Espnl	8.35104	0.0364214	0.794889	0.0458194	0.963454	0.981001	0.066	0.059
ENSMUSG00000026308	Klhl30	13.4609	-0.343534	0.627249	-0.547683	0.583909	0.748209	0.219	0.26
ENSMUSG00000047443	Erfe	22.004	-0.331315	0.724597	-0.45724	0.647498	0.794065	0.669	0.772
ENSMUSG00000026309	Ilkap	1386.04	-0.116984	0.186694	-0.62661	0.530915	0.706331	12.066	12.22
ENSMUSG00000067071	Hes6	1191.99	-1.15255	0.297249	-3.87739	0.000105584	0.00110426	68.591	141.263
ENSMUSG00000055866	Per2	306.437	-0.52266	0.320029	-1.63316	0.102435	0.243383	1.358	1.798
ENSMUSG00000034292	Traf3ip1	368.412	0.251476	0.162284	1.5496	0.121237	0.273897	2.577	2.022
ENSMUSG00000026311	Asb1	703.042	0.67172	0.231635	2.89991	0.00373268	0.0203308	10.257	6.047
ENSMUSG00000100980	Gm29100	1.07607	0.428038	1.98361	0.215787	0.829154	NA	0.062	0.043
ENSMUSG00000007805	Twist2	2.68014	-2.21693	1.51199	-1.46623	0.142585	0.305453	0.004	0.02
ENSMUSG00000026313	Hdac4	1468.86	-0.117774	0.166595	-0.706949	0.479598	0.665153	1.158	1.174
ENSMUSG00000026260	Ndufa10	3462.46	0.371532	0.203701	1.82391	0.0681654	0.182923	23.011	16.668
ENSMUSG00000073616	Cops9	1033.07	0.071243	0.139737	0.509835	0.610167	0.767426	46.558	41.425
ENSMUSG00000044055	Otos	1.37011	0.471985	2.28118	0.206904	0.836085	NA	0.074	0.052
ENSMUSG00000100781	Gm29481	1.54384	0.365955	1.78868	0.204595	0.837888	NA	0.029	0.021
ENSMUSG00000034220	Gpc1	938.129	0.290071	0.23092	1.25616	0.20906	0.396293	7.691	5.831
ENSMUSG00000034212	Ankmy1	80.2797	0.183126	0.541959	0.337897	0.735441	0.852289	0.318	0.27
ENSMUSG00000047067	Dusp28	410.544	0.0508997	0.294481	0.172845	0.862773	0.927279	58.958	53.045
ENSMUSG00000097251	5033417F24Rik	80.2832	0.565259	0.342136	1.65215	0.0985045	0.236726	8.765	5.528
ENSMUSG00000026269	Rnpepl1	391.595	0.154946	0.162228	0.955113	0.339521	0.539693	6.9	5.789
ENSMUSG00000100632	9430060I03Rik	36.9962	0.129854	0.353015	0.367844	0.71299	0.837586	0.532	0.456
ENSMUSG00000026270	Capn10	1161.84	-0.174056	0.158303	-1.09951	0.271547	0.468791	19.032	20.218
ENSMUSG00000026271	Gpr35	90.8249	-0.302672	0.261629	-1.15688	0.247323	0.44235	0.411	0.476
ENSMUSG00000014602	Kif1a	3811.27	1.69507	0.299053	5.66813	1.44368e-08	5.29172e-07	15.83	4.493
ENSMUSG00000026272	Agxt	4.47934	0.257852	0.908418	0.283848	0.776527	0.879273	0.109	0.086
ENSMUSG00000084989	Crocc2	33.7127	-2.18982	0.77967	-2.80864	0.00497508	0.0253467	0.051	0.216
ENSMUSG00000047793	Sned1	183.221	-1.83142	0.327453	-5.59293	2.23272e-08	7.73024e-07	0.274	0.907
ENSMUSG00000026273	Mterf4	549.909	0.206532	0.164939	1.25217	0.210507	0.398359	20.001	16.198
ENSMUSG00000101172	Gm28535	21.0162	0.0693275	0.51648	0.134231	0.89322	0.943734	0.495	0.449
ENSMUSG00000100351	Gm7867	1.46759	-0.342426	1.73623	-0.197224	0.843652	NA	0.505	0.602
ENSMUSG00000026274	Pask	1374.42	-0.494536	0.242014	-2.04342	0.0410107	0.125702	8.053	10.691
ENSMUSG00000026275	Ppp1r7	3071.56	-0.194669	0.165111	-1.17902	0.23839	0.432087	17.695	18.941
ENSMUSG00000034107	Ano7	4.00681	1.36768	1.13234	1.20784	0.227109	0.41878	0.048	0.017
ENSMUSG00000034088	Hdlbp	6433.53	0.0556962	0.207176	0.268836	0.788056	0.886218	18.255	16.409
ENSMUSG00000026276	Septin2	11.5412	-0.802697	0.654044	-1.22728	0.219716	0.409763	0.058	0.094
ENSMUSG00000034066	Farp2	952.832	-0.294476	0.262501	-1.12181	0.261943	0.458211	1.484	1.68
ENSMUSG00000026277	Stk25	4692.02	0.268215	0.183566	1.46114	0.143978	0.307288	26.739	20.873
ENSMUSG00000100927	Gm28536	11.0858	0.458993	0.704572	0.65145	0.514756	0.693967	2.059	1.41
ENSMUSG00000026278	Bok	457.731	-0.0286796	0.247107	-0.116062	0.907604	0.95175	11.131	10.564
ENSMUSG00000026279	Thap4	1071.26	0.105668	0.145419	0.726649	0.467441	0.655668	4.293	3.744
ENSMUSG00000101952	Gm10550	6.06266	0.302057	0.980253	0.308142	0.757974	0.867066	0.066	0.051
ENSMUSG00000026280	Atg4b	1508.86	0.175059	0.121583	1.43984	0.149913	0.316227	8.348	6.954
ENSMUSG00000026281	Dtymk	1241.15	0.144634	0.233119	0.62043	0.534975	0.70976	32.378	27.488
ENSMUSG00000026283	Ing5	963.193	0.107829	0.200142	0.538764	0.59005	0.752759	11.272	9.843
ENSMUSG00000073609	D2hgdh	240.084	0.25467	0.199916	1.27388	0.202705	0.387996	1.958	1.533
ENSMUSG00000101660	Gm18666	5.79018	0.292111	0.807651	0.36168	0.717591	0.840748	0.105	0.081
ENSMUSG00000093805	Gal3st2b	70.6134	-0.205401	0.486813	-0.42193	0.673076	0.811622	0.586	0.628
ENSMUSG00000099624	Gm7889	13.6129	0.0942356	0.702674	0.13411	0.893316	0.943781	0.305	0.269
ENSMUSG00000034000	Neu4	9.19182	3.82285	1.47371	2.59403	0.00948581	0.0414337	0.657	0.042
ENSMUSG00000026285	Pdcd1	9.69189	3.89098	1.28536	3.02715	0.0024687	0.0145668	0.215	0.014
ENSMUSG00000100347	Gm7895	80.7175	-0.255264	0.474424	-0.538051	0.590542	0.753047	11.879	12.955
ENSMUSG00000051185	Fam174a	703.251	0.0795616	0.217966	0.365019	0.715097	0.839	6.608	5.857
ENSMUSG00000081051	Gm15427	839.738	0.323086	0.414907	0.778695	0.436159	0.629172	401.385	301.485
ENSMUSG00000040710	St8sia4	101.657	0.890944	0.291247	3.05907	0.00222027	0.0133779	0.36	0.181
ENSMUSG00000095955	Gm22360	2.70985	-0.0477699	1.44081	-0.0331548	0.973551	0.986352	2.579	2.517
ENSMUSG00000040693	Slco4c1	29.0591	-0.0668938	0.729857	-0.0916532	0.926974	0.962251	0.094	0.089
ENSMUSG00000097814	Panct2	15.8992	0.155052	0.921784	0.168208	0.866419	0.929105	0.09	0.074
ENSMUSG00000044757	Gm6430	45.8614	0.210884	0.372634	0.565927	0.571443	0.738443	8.817	7.213
ENSMUSG00000101348	Gm7135	1.39119	2.64822	2.00937	1.31793	0.187526	NA	0.002	0
ENSMUSG00000044768	D1Ertd622e	608.042	0.148546	0.22722	0.653751	0.513272	0.692725	2.498	2.089
ENSMUSG00000040648	Ppip5k2	1263.19	0.0613852	0.171918	0.35706	0.721047	0.842752	4.553	4.089
ENSMUSG00000026333	Gin1	213.885	0.315303	0.217453	1.44998	0.147063	0.312143	2.195	1.638
ENSMUSG00000026335	Pam	1076.34	0.436093	0.368349	1.18391	0.236448	0.429572	0.919	0.624
ENSMUSG00000100711	Gm29461	5.06618	-5.01979	1.43537	-3.49721	0.000470155	0.00375504	0.004	0.132
ENSMUSG00000100009	Gm7967	22.4203	3.70071	1.37163	2.69804	NA	NA	0.548	0.037
ENSMUSG00000099686	Gm29460	1.59729	3.63324	2.15849	1.68324	0.0923293	NA	0.68	0
ENSMUSG00000067028	Cntnap5b	40.7431	0.918378	0.767373	1.19678	0.231392	0.424346	0.02	0.01
ENSMUSG00000082431	Prdx2-ps1	118.768	0.323289	0.952635	0.339363	0.734336	0.85148	58.212	42.802
ENSMUSG00000099835	Gm29668	6.95676	-0.662369	0.765881	-0.864846	0.387124	0.585427	3.308	4.974
ENSMUSG00000050840	Cdh20	1041.41	1.55549	0.396626	3.9218	8.78895e-05	0.00094769	1.206	0.379
ENSMUSG00000047496	Rnf152	78.6929	-0.453092	0.347489	-1.3039	0.192267	0.374375	0.189	0.24
ENSMUSG00000097482	Gm17634	1.82654	1.4424	1.77032	0.814767	0.415205	NA	0.145	0.049
ENSMUSG00000101214	Gm28403	87.6369	-1.61928	0.365734	-4.42748	9.53386e-06	0.000145917	0.042	0.121
ENSMUSG00000067017	Capza1-ps1	346.607	-1.39467	0.711646	-1.95978	0.0500215	0.145686	17.375	44.36
ENSMUSG00000056536	Pign	1241.45	-0.364637	0.149019	-2.44691	0.0144088	0.0570154	1.551	1.876
ENSMUSG00000026319	Relch	3440.37	-0.0706216	0.152651	-0.462633	0.643627	0.79155	7.586	7.484
ENSMUSG00000026321	Tnfrsf11a	59.6632	0.506564	0.355582	1.4246	0.154271	0.32242	0.218	0.143
ENSMUSG00000099843	Gm7160	31.5051	-0.0249625	0.530233	-0.0470782	0.962451	0.980403	0.493	0.471
ENSMUSG00000038866	Zcchc2	848.744	-0.144432	0.272446	-0.530132	0.596021	0.757275	3.692	3.834
ENSMUSG00000097612	Gm26509	1.08852	-0.899387	2.55665	-0.351784	0.725001	NA	0.073	0.139
ENSMUSG00000101583	Gm20753	40.2417	0.343237	0.413259	0.830562	0.406221	0.602845	0.37	0.274
ENSMUSG00000044340	Phlpp1	2253.26	-0.157101	0.292094	-0.537843	0.590685	0.75307	1.757	1.824
ENSMUSG00000099604	Gm6651	4.54148	-1.05464	2.73511	-0.385593	0.699798	0.829802	3.587	7.121
ENSMUSG00000057329	Bcl2	343.903	0.152572	0.259888	0.587067	0.557159	0.726817	0.426	0.356
ENSMUSG00000009905	Kdsr	1110.69	0.0191629	0.233358	0.082118	0.934553	0.966387	6.186	5.749
ENSMUSG00000009907	Vps4b	1577.05	0.281468	0.171317	1.64297	0.10039	0.239869	11.886	9.203
ENSMUSG00000067006	Serpinb5	1.18235	3.00494	2.54773	1.17946	0.238216	NA	0.028	0.003
ENSMUSG00000067001	Serpinb7	1.19017	-1.10199	2.16074	-0.510003	0.610049	NA	0.004	0.008
ENSMUSG00000092572	Serpinb10	1.79029	-3.87805	1.76888	-2.19237	0.0283524	NA	0	0.026
ENSMUSG00000026315	Serpinb8	55.2181	1.24823	0.559534	2.23085	0.0256913	0.0888338	0.769	0.296
ENSMUSG00000026312	Cdh7	47.4705	2.95142	0.903252	3.26755	0.00108485	0.00749977	0.13	0.015
ENSMUSG00000047216	Cdh19	49.9889	3.44295	0.60997	5.64446	1.65699e-08	5.95083e-07	0.209	0.018
ENSMUSG00000100555	Gm8173	2.23324	0.284918	1.35157	0.210806	0.833039	0.910281	0.218	0.165
ENSMUSG00000038702	Dsel	371.532	-0.454818	0.294854	-1.54252	0.122947	0.276172	10.763	13.643
ENSMUSG00000097648	9330185C12Rik	284.121	-2.77374	1.15955	-2.39209	0.0167528	0.0642955	0.198	1.321
ENSMUSG00000100515	Gm17916	10.8177	0.0827659	0.7506	0.110266	0.912198	0.953979	0.177	0.154
ENSMUSG00000070695	Cntnap5a	1773.35	-0.452681	0.3859	-1.17305	0.240775	0.434379	0.392	0.492
ENSMUSG00000026374	Tsn	3975.86	-0.0195031	0.139132	-0.140177	0.88852	0.941451	49.981	47.63
ENSMUSG00000026377	Nifk	1648.29	0.155651	0.133078	1.16962	0.242153	0.436122	31.062	26.135
ENSMUSG00000064302	Clasp1	5994.09	-0.251293	0.211481	-1.18825	0.234733	0.427666	4.74	5.27
ENSMUSG00000107722	2900060B14Rik	21.6173	-0.0621621	0.455951	-0.136335	0.891557	0.942909	7.759	7.57
ENSMUSG00000026380	Tfcp2l1	91.3676	1.8106	0.404675	4.4742	7.66989e-06	0.000122436	0.577	0.152
ENSMUSG00000048402	Gli2	489.343	-0.83171	0.227267	-3.65961	0.000252599	0.00225408	0.396	0.661
ENSMUSG00000097408	Gm26831	22.6048	0.0645069	0.533801	0.120845	0.903814	0.949395	3.847	3.441
ENSMUSG00000099860	Gm29456	1.38423	-2.06182	1.75158	-1.17712	0.239148	NA	0.006	0.025
ENSMUSG00000037035	Inhbb	2198.56	-0.36614	0.317281	-1.15399	0.248503	0.443662	65.541	78.622
ENSMUSG00000004451	Ralb	287.998	0.292087	0.221112	1.32099	0.186504	0.366522	1.969	1.493
ENSMUSG00000098447	Gm27184	15.3154	0.451889	0.494645	0.91356	0.360948	0.561207	0.608	0.417
ENSMUSG00000098923	Tmem185b	496.239	0.585858	0.220156	2.66111	0.00778843	0.0355666	42.044	26.206
ENSMUSG00000101731	3830432H09Rik	25.082	-0.890144	0.388507	-2.29119	0.0219525	0.0789662	0.559	0.974
ENSMUSG00000026383	Epb41l5	4122.22	-0.537775	0.198537	-2.70869	0.00675501	0.0318662	6.638	8.985
ENSMUSG00000026384	Ptpn4	4523.11	-0.254374	0.201555	-1.26206	0.206928	0.393556	4.599	5.114
ENSMUSG00000091876	Gm3851	1.63083	-0.569116	1.62658	-0.349886	0.726424	NA	0.864	1.221
ENSMUSG00000100636	Gm3551	1.29117	-0.954192	2.28703	-0.417219	0.676518	NA	0.105	0.199
ENSMUSG00000101224	Gm28209	8.90445	-3.58147	1.08908	-3.28854	0.00100709	0.00705198	0.092	1.028
ENSMUSG00000036975	Tmem177	434.516	-0.0953232	0.176631	-0.539674	0.589422	0.752171	17.033	17.036
ENSMUSG00000036962	Cfap221	15.6113	-1.65833	0.794329	-2.08771	0.0368243	0.116545	0.018	0.053
ENSMUSG00000026387	Sctr	4.86486	0.89852	0.910088	0.987289	0.323501	0.524538	0.028	0.014
ENSMUSG00000050777	Tmem37	40.8731	-0.551692	0.406254	-1.358	0.174464	0.349638	1.064	1.442
ENSMUSG00000026385	Dbi	1254.78	0.0662263	0.295228	0.224322	0.822506	0.903993	33.175	29.271
ENSMUSG00000026388	3110009E18Rik	130.472	-0.184838	0.198117	-0.932973	0.350834	0.551266	0.4	0.425
ENSMUSG00000026389	Steap3	190.467	-0.494868	0.302506	-1.63589	0.101862	0.242375	0.369	0.486
ENSMUSG00000036907	C1ql2	115.871	-0.5783	0.382544	-1.51172	0.130604	0.287639	6.493	8.898
ENSMUSG00000026390	Marco	3.01521	-5.06845	1.69225	-2.9951	0.00274359	0.0158619	0	0.04
ENSMUSG00000097881	Celrr	10.8008	3.37378	1.0998	3.06762	0.00215769	0.0131189	0.041	0.004
ENSMUSG00000003721	Insig2	586.344	0.272646	0.180139	1.51353	0.130146	0.287047	4.801	3.713
ENSMUSG00000104253	Gm37174	57.1209	-0.129456	0.422615	-0.30632	0.759361	0.867952	4.127	4.287
ENSMUSG00000101791	2210011K15Rik	2.72634	-3.92588	1.84743	-2.12505	0.0335825	0.108754	0	0.112
ENSMUSG00000026339	Ccdc93	607.338	0.266561	0.109975	2.42382	0.0153581	0.0600827	1.903	1.484
ENSMUSG00000050534	Htr5b	4.03753	4.85203	1.87475	2.5881	0.00965074	0.0420069	0.112	0.004
ENSMUSG00000001674	Ddx18	933.903	0.260852	0.141859	1.83882	0.065942	0.178585	14.085	11.032
ENSMUSG00000102488	Gm37920	1.19412	-0.899341	2.16748	-0.414924	0.678197	NA	0.093	0.175
ENSMUSG00000036815	Dpp10	758.474	4.39114	0.786212	5.58518	2.33456e-08	8.0434e-07	0.267	0.012
ENSMUSG00000099574	1700121L03Rik	3.112	-4.94999	1.64099	-3.01647	0.00255741	0.0149817	0	0.154
ENSMUSG00000026341	Actr3	3935.37	0.311127	0.102606	3.03225	0.00242736	0.0143829	21.801	16.428
ENSMUSG00000026342	Slc35f5	748.708	-0.00210077	0.206793	-0.0101588	0.991895	0.995559	4.912	4.609
ENSMUSG00000026343	Gpr39	1.17895	3.81399	2.62815	1.45121	0.146722	NA	0.003	0
ENSMUSG00000026344	Lypd1	60.0146	2.03254	0.72789	2.79237	0.00523228	0.0263279	0.53	0.118
ENSMUSG00000049690	Nckap5	159.259	0.0717713	0.337608	0.212588	0.831649	0.909184	0.037	0.033
ENSMUSG00000036155	Mgat5	1405.15	1.40555	0.279587	5.02723	4.97627e-07	1.1755e-05	1.335	0.473
ENSMUSG00000099471	Gm8451	49.995	0.307515	0.403722	0.761701	0.446238	0.638174	27.771	21.07
ENSMUSG00000026347	Tmem163	19.5914	1.99318	0.8599	2.31792	0.0204539	0.0749952	0.037	0.009
ENSMUSG00000026348	Acmsd	1.59564	-2.31053	1.85261	-1.24717	0.212333	NA	0.004	0.017
ENSMUSG00000102014	2900009J06Rik	51.5196	0.946353	0.350602	2.69922	0.00695022	0.0325455	0.803	0.392
ENSMUSG00000026349	Ccnt2	2195.67	-0.0463726	0.110121	-0.421108	0.673676	0.812008	14.025	13.582
ENSMUSG00000051590	Map3k19	87.5248	0.152928	0.587577	0.260268	0.794657	0.888829	0.531	0.451
ENSMUSG00000036104	Rab3gap1	2726.84	0.253531	0.270828	0.936136	0.349203	0.549478	7.017	5.544
ENSMUSG00000036086	Zranb3	771.832	-0.211201	0.201132	-1.05006	0.293689	0.493417	1.116	1.214
ENSMUSG00000099760	Gm28800	5.40526	3.66151	1.63873	2.23435	0.0254599	0.0882639	0.364	0.026
ENSMUSG00000058603	Rpl28-ps1	84.1856	0.170048	0.363764	0.467469	0.640164	0.789053	46.902	38.894
ENSMUSG00000056211	R3hdm1	1111.62	0.558832	0.181725	3.07515	0.002104	0.0128403	2.153	1.364
ENSMUSG00000026353	Ubxn4	3806.87	0.0766519	0.13166	0.582198	0.560433	0.729586	22.996	20.464
ENSMUSG00000026354	Lct	11.6942	0.858137	0.611353	1.40367	0.160418	0.330458	0.088	0.046
ENSMUSG00000026355	Mcm6	4587.07	-0.131117	0.404584	-0.324079	0.745878	0.859403	36.21	37.368
ENSMUSG00000026356	Dars	3067.08	0.0930234	0.148872	0.624855	0.532066	0.707158	11.903	10.442
ENSMUSG00000100078	Gm6170	134.761	-0.291336	0.284969	-1.02234	0.30662	0.50702	19.585	22.459
ENSMUSG00000045382	Cxcr4	120.133	-0.51158	0.454546	-1.12547	0.260388	0.45632	3.812	5.059
ENSMUSG00000042581	Thsd7b	46.0734	-0.255441	0.790729	-0.323045	0.746661	0.859978	0.013	0.014
ENSMUSG00000089648	Gm15790	37.4825	-0.869455	0.332328	-2.61626	0.00888998	0.0394492	4.586	7.862
ENSMUSG00000094122	Rpl31-ps9	1.12317	2.71413	1.98606	1.36659	0.171754	NA	1.285	0.175
ENSMUSG00000026399	Cd55	47.1599	-1.27123	0.647366	-1.96369	0.0495658	0.144836	0.266	0.59
ENSMUSG00000085526	Gm16083	17.3815	1.25014	0.609897	2.04975	0.0403886	0.124221	0.062	0.024
ENSMUSG00000101904	Gm29427	7.79777	0.0876476	0.8588	0.102058	0.91871	0.957869	0.03	0.026
ENSMUSG00000026409	Pfkfb2	69.8092	0.340874	0.272642	1.25026	0.211203	0.399089	0.397	0.295
ENSMUSG00000046404	Yod1	912.727	0.0988822	0.150383	0.657538	0.510835	0.690945	29.633	25.972
ENSMUSG00000042510	AA986860	80.3562	-0.678339	0.404283	-1.67788	0.0933701	0.228355	0.745	1.113
ENSMUSG00000026415	Fcamr	14.4657	1.42733	0.857197	1.66512	0.0958894	0.232445	0.146	0.051
ENSMUSG00000026417	Pigr	1.18837	0.909876	2.02695	0.448889	0.653512	NA	0.011	0.005
ENSMUSG00000016524	Il19	1.12643	0.469767	3.19203	0.147168	0.882999	NA	0.056	0.04
ENSMUSG00000016529	Il10	2.94814	2.64166	2.34883	1.12467	0.260728	0.456614	0.161	0.024
ENSMUSG00000016528	Mapkapk2	1593.07	0.178919	0.252834	0.707655	0.479159	0.664808	7.862	6.572
ENSMUSG00000016526	Dyrk3	298.989	0.371206	0.342648	1.08334	0.278655	0.476933	6.694	4.922
ENSMUSG00000026427	Eif2d	969.571	0.110128	0.122936	0.895816	0.370351	0.570574	6.361	5.52
ENSMUSG00000026430	Rassf5	67.2975	1.99569	0.403131	4.95048	7.40295e-07	1.64943e-05	0.353	0.082
ENSMUSG00000042349	Ikbke	32.4482	-0.332379	0.513868	-0.646819	0.517749	0.696457	0.236	0.281
ENSMUSG00000026425	Srgap2	1880.57	-0.250264	0.247869	-1.00966	0.312658	0.512963	1.58	1.761
ENSMUSG00000055184	Fam72a	124.664	-0.020466	0.257739	-0.079406	0.93671	0.967382	2.345	2.23
ENSMUSG00000004552	Ctse	34.1515	1.11415	0.603918	1.84487	0.065056	0.176909	0.313	0.139
ENSMUSG00000052688	Rab7b	67.9141	0.273959	0.343015	0.798679	0.424476	0.619182	0.432	0.333
ENSMUSG00000042251	Pm20d1	25.2541	-0.411694	0.528299	-0.779281	0.435814	0.628922	0.172	0.212
ENSMUSG00000013275	Slc41a1	1012.08	-0.280585	0.251174	-1.11709	0.263955	0.460173	8.754	9.983
ENSMUSG00000026433	Rab29	43.1899	0.307432	0.354964	0.866094	0.386439	0.584708	1.745	1.309
ENSMUSG00000026434	Nucks1	9495.14	0.0316201	0.1956	0.161657	0.871576	0.931824	84.316	77.061
ENSMUSG00000100037	Gm29103	3.24813	1.77723	1.18158	1.50412	0.132551	0.290603	0.027	0.008
ENSMUSG00000026436	Elk4	1142.88	0.271871	0.106938	2.54232	0.0110119	0.0465173	10.935	8.496
ENSMUSG00000059149	Mfsd4a	61.8002	3.91294	0.809475	4.83393	1.33864e-06	2.73261e-05	0.699	0.043
ENSMUSG00000103966	Gm37120	2.3681	-2.01501	1.32364	-1.52232	0.127928	0.283703	0.035	0.133
ENSMUSG00000026437	Cdk18	12.2711	3.69165	1.05786	3.48974	0.000483484	0.00383978	0.228	0.016
ENSMUSG00000079330	Lemd1	1.61985	3.55664	1.90635	1.86568	0.0620865	NA	0.013	0.001
ENSMUSG00000101549	Gm29630	7.94759	2.33382	0.820167	2.84554	0.00443361	0.0232103	0.608	0.113
ENSMUSG00000042115	Klhdc8a	1016.34	2.96166	0.619518	4.78058	1.74788e-06	3.4009e-05	54.794	6.838
ENSMUSG00000009772	Nuak2	341.258	0.382507	0.386292	0.990202	0.322075	0.522787	5.523	3.974
ENSMUSG00000100658	F730311O21Rik	1.16632	1.147	2.03567	0.56345	0.573128	NA	0.036	0.016
ENSMUSG00000042066	Tmcc2	2584.91	-0.301966	0.184484	-1.63681	0.101669	0.242062	13.667	15.823
ENSMUSG00000042046	Dstyk	2041.12	-0.0861635	0.281693	-0.305877	0.759698	0.868104	7.728	7.719
ENSMUSG00000097760	6030442K20Rik	41.9372	0.34422	0.407108	0.845524	0.397818	0.595055	1.046	0.772
ENSMUSG00000026439	Rbbp5	1386.9	0.159067	0.163405	0.973454	0.330328	0.531204	10.88	9.173
ENSMUSG00000048174	Tmem81	44.7808	0.247535	0.338856	0.730502	0.465083	0.653708	3.879	3.058
ENSMUSG00000053024	Cntn2	540.72	-0.244308	0.596163	-0.409802	0.681952	0.817485	3.441	3.756
ENSMUSG00000026442	Nfasc	549.461	1.3884	0.380735	3.64663	0.000265702	0.00234622	1.069	0.375
ENSMUSG00000026443	Lrrn2	159.532	1.13895	0.263224	4.32692	1.51212e-05	0.000212468	0.904	0.386
ENSMUSG00000102709	Gm38308	1.46336	-1.00425	1.51	-0.665067	0.506008	NA	0.116	0.218
ENSMUSG00000054387	Mdm4	1898.3	0.0439745	0.164622	0.267124	0.789373	0.886649	6.026	5.478
ENSMUSG00000100228	Gm29257	10.9819	-0.0612522	0.693725	-0.0882945	0.929643	0.963968	3.693	3.626
ENSMUSG00000026447	Pik3c2b	217.778	0.326206	0.366561	0.889908	0.373515	0.573383	0.896	0.679
ENSMUSG00000102425	Gm26616	15.8775	0.61175	0.567062	1.07881	0.280674	0.479111	1.296	0.804
ENSMUSG00000046062	Ppp1r15b	2832.6	0.230737	0.104343	2.21133	0.0270132	0.0922603	77.021	61.473
ENSMUSG00000041757	Plekha6	627.706	2.4744	0.164111	15.0776	2.27329e-51	2.40844e-47	1.784	0.3
ENSMUSG00000101693	Gm19461	2.50129	0.848074	1.69961	0.498981	0.617793	0.772843	0.025	0.014
ENSMUSG00000070645	Ren1	1.44915	0.0310969	1.46341	0.0212495	0.983047	NA	0.042	0.04
ENSMUSG00000070644	Etnk2	16.3614	0.663582	0.634282	1.04619	0.295472	0.495665	0.24	0.142
ENSMUSG00000070643	Sox13	57.1063	-0.44331	0.33057	-1.34105	0.179905	0.357835	0.204	0.259
ENSMUSG00000090553	Snrpe	1109.48	0.229095	0.212104	1.08011	0.280095	0.478546	41.383	33.179
ENSMUSG00000051998	Lax1	16.8957	2.10784	0.779684	2.70345	0.00686238	0.0322267	0.535	0.12
ENSMUSG00000026463	Atp2b4	1335.23	0.804646	0.41807	1.92467	0.0542708	0.154583	3.027	1.599
ENSMUSG00000010311	Optc	443.813	-5.40829	0.80121	-6.75016	1.47686e-11	1.14627e-09	0.336	13.829
ENSMUSG00000041577	Prelp	209.676	-1.24521	0.405132	-3.07358	0.00211504	0.0128928	1.628	3.609
ENSMUSG00000041559	Fmod	191.958	-0.478109	0.701197	-0.681848	0.495335	0.677908	2.911	3.682
ENSMUSG00000020423	Btg2	7078.24	0.413039	0.205801	2.00698	0.0447515	0.134197	473.568	333.557
ENSMUSG00000102380	Gm38140	33.105	1.13214	0.362469	3.12343	0.00178758	0.0112897	3.942	1.693
ENSMUSG00000026450	Chit1	12.2462	3.75048	1.28573	2.91701	0.00353407	0.0194654	0.138	0.009
ENSMUSG00000064246	Chil1	3167.46	2.20246	0.285908	7.7034	1.32494e-14	1.95841e-12	91.405	18.696
ENSMUSG00000042451	Mybph	3484.12	2.37452	0.557781	4.25708	2.07117e-05	0.000279885	107.262	18.911
ENSMUSG00000042429	Adora1	4278.68	2.0066	0.402785	4.9818	6.29944e-07	1.44146e-05	39.242	9.167
ENSMUSG00000026459	Myog	1822.11	1.60424	1.00516	1.59599	0.11049	0.256399	256.326	78.891
ENSMUSG00000026458	Ppfia4	2588.67	-0.451954	0.393594	-1.14827	0.250855	0.446107	10.799	14.098
ENSMUSG00000042305	Tmem183a	1509.64	0.075667	0.131179	0.576823	0.564059	0.732343	20.718	18.421
ENSMUSG00000026456	Cyb5r1	687.974	0.61229	0.197951	3.09314	0.00198052	0.0122098	25.514	15.545
ENSMUSG00000026457	Adipor1	5554.63	0.162523	0.159677	1.01782	0.308761	0.508799	72.406	60.299
ENSMUSG00000102722	Gm37935	15.0275	0.313635	0.48739	0.643499	0.5199	0.697888	3.665	2.772
ENSMUSG00000026455	Klhl12	1245.88	0.119136	0.225962	0.527238	0.598028	0.75887	7.121	6.17
ENSMUSG00000042229	Rabif	1070.82	0.0316971	0.26345	0.120315	0.904233	0.949633	15.424	14.023
ENSMUSG00000096712	Gm15454	1.39303	0.107739	1.80588	0.0596602	0.952426	NA	0.862	0.732
ENSMUSG00000101955	Gm29376	1.61626	-0.437051	1.68791	-0.258931	0.795689	NA	0.067	0.082
ENSMUSG00000046367	Mgat4e	3.41518	0.490448	1.1825	0.414756	0.67832	0.815507	0.111	0.076
ENSMUSG00000042207	Kdm5b	5313.21	-0.07989	0.259227	-0.308185	0.757941	0.867066	14.669	14.507
ENSMUSG00000026452	Syt2	383.829	3.76509	0.432964	8.69608	3.43557e-18	9.63135e-16	1.251	0.087
ENSMUSG00000073557	Ppp1r12b	1493	-0.0255877	0.239062	-0.107034	0.914762	0.955334	1.465	1.391
ENSMUSG00000026429	Ube2t	623.117	-0.371036	0.291468	-1.27299	0.203022	0.388428	11.042	13.35
ENSMUSG00000042793	Lgr6	11.1006	-0.335703	0.575437	-0.583388	0.559632	0.729008	0.016	0.019
ENSMUSG00000097993	Ptprv	10.2079	-1.4958	0.925727	-1.61581	0.106136	0.249405	0.04	0.107
ENSMUSG00000097988	Gm10535	1.92787	-1.66179	1.64036	-1.01307	0.311029	NA	0.047	0.142
ENSMUSG00000031506	Ptpn7	14.2617	0.989491	0.664341	1.48943	0.136373	0.296006	0.281	0.135
ENSMUSG00000026426	Arl8a	361.719	0.81332	0.281649	2.88771	0.00388057	0.0209119	9.747	5.161
ENSMUSG00000026424	Gpr37l1	465.171	4.43756	0.696444	6.37174	1.86891e-10	1.1155e-08	27.427	1.136
ENSMUSG00000079139	Gm4204	3664.46	-0.562772	0.15435	-3.64608	0.000266273	0.00234988	504.717	702.099
ENSMUSG00000003051	Elf3	1.50132	-1.28955	1.72624	-0.747031	0.455045	NA	0.042	0.094
ENSMUSG00000041926	Rnpep	719.522	0.177801	0.308476	0.576387	0.564354	0.732636	7.009	5.694
ENSMUSG00000062580	Timm17a	1455.03	0.146389	0.169484	0.863735	0.387734	0.585793	17.322	14.594
ENSMUSG00000048096	Lmod1	11.2945	-0.320806	0.752404	-0.426375	0.669834	0.809186	0.051	0.06
ENSMUSG00000041889	Shisa4	1350.58	0.211419	0.213679	0.989422	0.322457	0.523245	73.598	59.248
ENSMUSG00000041879	Ipo9	3755.23	-0.37361	0.158671	-2.35461	0.0185419	0.0695396	15.188	18.341
ENSMUSG00000009418	Nav1	699.926	0.787084	0.320889	2.45283	0.0141738	0.0564209	0.745	0.399
ENSMUSG00000054412	Gm4793	10.0164	2.10861	0.693068	3.04243	0.00234677	0.0139836	0.264	0.057
ENSMUSG00000026421	Csrp1	971.255	1.11245	0.265875	4.18409	2.86314e-05	0.000366568	9.278	4.055
ENSMUSG00000041801	Phlda3	67.3422	0.80324	0.370068	2.17052	0.0299677	0.100045	3.869	2.054
ENSMUSG00000026418	Tnni1	7.82902	2.09045	1.03961	2.01081	0.044345	0.133243	0.057	0.012
ENSMUSG00000041782	Lad1	45.7236	2.13168	0.604367	3.52713	0.000420092	0.0034368	1.116	0.233
ENSMUSG00000026414	Tnnt2	12.8456	3.03063	0.858507	3.53012	0.000415366	0.00340736	0.385	0.044
ENSMUSG00000101482	Gm28883	5.12751	-0.456033	0.842377	-0.541365	0.588256	0.751194	2.631	3.406
ENSMUSG00000026413	Pkp1	10.0109	0.201144	0.783	0.256889	0.797265	0.889794	0.042	0.034
ENSMUSG00000051985	Igfn1	143.358	-1.99244	0.647867	-3.07538	0.00210232	0.0128375	0.286	1.042
ENSMUSG00000026411	Tmem9	2478.99	-0.678097	0.274303	-2.47207	0.0134332	0.0541441	16.979	25.13
ENSMUSG00000097918	Ascl5	3.88329	0.688728	1.4247	0.483419	0.628798	0.780985	2.214	1.308
ENSMUSG00000026407	Cacna1s	634.669	-3.40566	0.499785	-6.81425	9.47554e-12	7.5765e-10	0.442	4.35
ENSMUSG00000102717	Gm37759	2.22615	-0.547707	1.32424	-0.413601	0.679167	0.816025	0.129	0.179
ENSMUSG00000086264	Gm15850	32.103	2.01291	0.439883	4.57602	4.73912e-06	8.13754e-05	2.214	0.518
ENSMUSG00000041642	Kif21b	2861.91	-0.0293591	0.38298	-0.0766597	0.938894	0.96812	13.61	13.042
ENSMUSG00000087230	Mroh3	7.4128	-0.512089	1.00786	-0.508095	0.611387	0.768459	0.047	0.061
ENSMUSG00000041605	Inava	7.47363	2.03042	0.943461	2.1521	0.0313897	0.103759	0.147	0.033
ENSMUSG00000097433	Gm26781	5.06023	1.57894	1.02329	1.54299	0.122833	0.276061	0.133	0.041
ENSMUSG00000041570	Camsap2	4786.11	0.0580243	0.222543	0.260733	0.794298	0.888569	11.658	10.475
ENSMUSG00000097403	9230116N13Rik	32.2197	-0.152145	0.381591	-0.398712	0.690105	0.823205	2.001	2.092
ENSMUSG00000026404	Ddx59	436.603	0.189636	0.195574	0.969641	0.332226	0.532813	4.06	3.352
ENSMUSG00000041498	Kif14	735.661	-0.563635	0.425237	-1.32546	0.185018	0.364628	2.271	3.106
ENSMUSG00000104414	Gm37799	3.171	-1.86044	1.16529	-1.59655	0.110366	0.256193	0.024	0.082
ENSMUSG00000097229	Platr23	4.38485	0.681596	0.851398	0.800561	0.423386	0.618219	0.434	0.253
ENSMUSG00000041483	Zfp281	2121.72	0.0225919	0.134497	0.167973	0.866604	0.929134	88.062	81.018
ENSMUSG00000097113	Gm19705	4.75004	1.36564	1.02329	1.33456	0.182021	0.360739	0.087	0.032
ENSMUSG00000026398	Nr5a2	6.52141	-0.598468	0.729079	-0.820854	0.411729	0.607742	0.009	0.013
ENSMUSG00000098243	Gm4258	592.767	-1.27894	0.312153	-4.09715	4.18267e-05	0.000505282	0.732	1.662
ENSMUSG00000026395	Ptprc	409.955	1.51327	0.390818	3.87206	0.000107921	0.00112481	0.877	0.289
ENSMUSG00000026393	Nek7	2501.67	0.0227857	0.196602	0.115898	0.907733	0.951752	3.716	3.419
ENSMUSG00000019230	Lhx9	503.331	-5.39918	1.22693	-4.40055	1.07976e-05	0.000160217	0.242	9.973
ENSMUSG00000079283	2310009B15Rik	253.168	-0.607999	0.225274	-2.69893	0.00695626	0.0325665	9.302	13.303
ENSMUSG00000102365	Gm37045	2.25425	1.16827	1.3415	0.87087	0.383825	0.583313	0.307	0.129
ENSMUSG00000056268	Dennd1b	2676.91	-0.296334	0.198116	-1.49576	0.134716	0.293611	2.326	2.676
ENSMUSG00000063681	Crb1	4568.57	0.169191	0.396136	0.427103	0.669304	0.808914	3.284	2.77
ENSMUSG00000033964	Zbtb41	2729.25	-0.405882	0.11665	-3.47949	0.000502374	0.00396159	17.256	21.418
ENSMUSG00000033952	Aspm	4063.02	-0.565009	0.357377	-1.58099	0.113881	0.261831	20.774	28.599
ENSMUSG00000026368	F13b	3.70256	-0.858432	1.11908	-0.767086	0.44303	0.635048	0.028	0.049
ENSMUSG00000089991	Gm16332	5.6726	2.48618	1.05396	2.35888	0.0183301	0.0690114	0.021	0.003
ENSMUSG00000085867	Gm5834	1.40767	-0.0439009	1.71616	-0.0255808	0.979592	NA	0.004	0.004
ENSMUSG00000103691	Gm38019	6.38051	0.129484	0.946355	0.136824	0.89117	0.942783	0.144	0.124
ENSMUSG00000026365	Cfh	1508.05	-0.0722915	0.410959	-0.175909	0.860365	0.925724	2.003	1.938
ENSMUSG00000052726	Kcnt2	127.14	1.90793	0.842578	2.2644	0.0235495	0.0831928	0.146	0.035
ENSMUSG00000101795	Gm5835	17.3666	0.0420116	0.538051	0.078081	0.937764	0.967482	2.949	2.671
ENSMUSG00000026361	Cdc73	2156.47	-0.0191318	0.230816	-0.0828876	0.933941	0.966226	3.914	3.703
ENSMUSG00000033849	B3galt2	1273.66	-0.369068	0.288244	-1.2804	0.200404	0.385122	19.074	23.325
ENSMUSG00000018196	Glrx2	646.502	0.443199	0.248359	1.78451	0.0743412	0.19488	4.856	3.364
ENSMUSG00000018199	Ro60	3808.44	-0.0742058	0.209369	-0.354426	0.723019	0.843987	27.99	27.692
ENSMUSG00000018189	Uchl5	647.633	0.549985	0.161102	3.4139	0.000640401	0.00486884	5.422	3.465
ENSMUSG00000026360	Rgs2	696.1	-0.256771	0.440544	-0.58285	0.559994	0.7293	23.563	26.092
ENSMUSG00000051079	Rgs13	17.9775	-3.58747	0.892892	-4.01781	5.87418e-05	0.000674968	0.018	0.199
ENSMUSG00000026358	Rgs1	18.602	3.00173	0.84879	3.53648	0.000405495	0.0033406	0.978	0.117
ENSMUSG00000100441	Gm7266	8.62011	0.493665	0.710684	0.694633	0.487285	0.671204	5.288	3.54
ENSMUSG00000026357	Rgs18	3.96189	-1.84173	1.11351	-1.65398	0.0981308	0.236149	0.012	0.041
ENSMUSG00000099964	Gm29514	4.25196	2.8278	1.35944	2.08011	0.0375153	0.118111	0.026	0.003
ENSMUSG00000035131	Brinp3	86.85	2.69322	0.602806	4.46781	7.9024e-06	0.000125241	0.099	0.014
ENSMUSG00000087627	A230059L01Rik	4.71098	-5.63539	1.8669	-3.01858	0.00253963	0.0149064	0	0.415
ENSMUSG00000082588	Gm15443	6.53922	-1.12363	0.780871	-1.43895	0.150166	0.316508	1.097	2.246
ENSMUSG00000056220	Pla2g4a	144.958	-0.426632	0.307332	-1.38818	0.165083	0.336794	0.175	0.219
ENSMUSG00000097028	Ptgs2os	3.39977	0.948336	1.14434	0.828719	0.407264	0.603758	0.044	0.021
ENSMUSG00000032487	Ptgs2	87.4529	2.34562	0.701189	3.3452	0.000822237	0.00600151	3.519	0.647
ENSMUSG00000099875	Rbm3-ps	122.393	-0.0814505	0.286308	-0.284485	0.776039	0.879048	68.367	68.652
ENSMUSG00000006007	Pdc	5812.81	0.0144183	0.673194	0.0214177	0.982912	0.990721	104.085	93.879
ENSMUSG00000099447	2310030A07Rik	30.1678	-0.309403	0.688222	-0.449569	0.653021	0.797974	0.276	0.317
ENSMUSG00000006010	Odr4	1932.4	-0.0156019	0.16671	-0.0935873	0.925437	0.961539	12.311	11.616
ENSMUSG00000006005	Tpr	9899.32	-0.118911	0.152504	-0.77972	0.435556	0.628806	34.717	35.344
ENSMUSG00000006014	Prg4	7.84472	0.833674	1.15629	0.720988	0.470917	0.658255	0.091	0.047
ENSMUSG00000101519	Ska2l-ps	4.87149	-0.738562	0.947103	-0.779811	0.435502	0.628771	1.916	2.977
ENSMUSG00000066842	Hmcn1	131.224	-1.23021	0.365493	-3.3659	0.000762932	0.00564644	0.041	0.088
ENSMUSG00000100954	Gm10138	54.4738	0.297464	0.395	0.753073	0.451406	0.642234	2.256	1.719
ENSMUSG00000023150	Ivns1abp	4500.43	0.127459	0.212176	0.600724	0.548024	0.719727	52.228	45.11
ENSMUSG00000052748	Swt1	608.724	0.384665	0.158372	2.42886	0.0151463	0.0593886	2.383	1.705
ENSMUSG00000053286	Trmt1l	929.813	0.279237	0.16199	1.72379	0.0847461	0.214001	6.714	5.163
ENSMUSG00000026484	Rnf2	2497.55	-0.175316	0.148943	-1.17707	0.239168	0.432722	11.859	12.528
ENSMUSG00000026483	Fam129a	363.872	-1.57421	0.240267	-6.55193	5.67999e-11	3.9203e-09	0.206	0.577
ENSMUSG00000100594	2810414N06Rik	46.4091	0.615797	0.376781	1.63436	0.102182	0.243001	1.748	1.077
ENSMUSG00000043019	Edem3	2600.16	0.178604	0.137276	1.30106	0.193239	0.375854	8.509	7.032
ENSMUSG00000032666	1700025G04Rik	1136.74	-0.211146	0.401223	-0.526255	0.598711	0.7591	1.119	1.224
ENSMUSG00000100685	Gm28610	1.97217	0.441163	1.19542	0.369043	0.712096	NA	0.048	0.033
ENSMUSG00000014980	Tsen15	514.28	-0.320374	0.141903	-2.2577	0.0239645	0.0842935	6.122	7.142
ENSMUSG00000032649	Colgalt2	38.2904	0.805452	0.518842	1.5524	0.120566	0.272759	0.093	0.049
ENSMUSG00000026482	Rgl1	569.895	0.499094	0.478871	1.04223	0.297305	0.497874	0.51	0.329
ENSMUSG00000055547	Apobec4	12.2839	0.0576111	0.775192	0.0743185	0.940757	0.969486	0.198	0.179
ENSMUSG00000008475	Arpc5	1594.42	0.089749	0.121361	0.739523	0.459589	0.649086	40.326	35.378
ENSMUSG00000026480	Ncf2	117.628	0.929684	0.339961	2.73468	0.00624419	0.0300495	0.819	0.398
ENSMUSG00000042772	Smg7	2691.71	0.199754	0.133621	1.49493	0.134933	0.294025	8.997	7.295
ENSMUSG00000042751	Nmnat2	2544.5	0.0448019	0.476501	0.0940226	0.925091	0.961342	3.077	2.7
ENSMUSG00000099969	Gm28960	70.9294	-0.418477	0.477591	-0.876226	0.380907	0.580651	0.541	0.661
ENSMUSG00000026479	Lamc2	65.3093	1.13207	0.565463	2.00202	0.0452829	0.13537	0.15	0.064
ENSMUSG00000026478	Lamc1	1660.29	-0.908186	0.117925	-7.70139	1.34594e-14	1.96684e-12	2.102	3.678
ENSMUSG00000073538	E330020D12Rik	2.48137	1.6012	1.29501	1.23644	0.216296	0.405326	0.088	0.027
ENSMUSG00000042708	Shcbp1l	7.02256	0.369489	0.744107	0.496554	0.619504	0.774272	0.073	0.053
ENSMUSG00000042699	Dhx9	4088.41	0.0214218	0.131634	0.162737	0.870726	0.931185	26.576	24.372
ENSMUSG00000042684	Npl	113.768	0.191863	0.367195	0.52251	0.601315	0.760763	0.573	0.459
ENSMUSG00000099858	Gm6652	18.5941	-0.972003	0.488706	-1.98893	0.0467086	0.138673	2.651	4.888
ENSMUSG00000042671	Rgs8	387.88	-0.583602	0.561964	-1.03851	0.299035	0.499941	1.272	1.782
ENSMUSG00000100334	C230024C17Rik	2.78953	-0.204008	1.43401	-0.142265	0.886871	0.940583	0.046	0.051
ENSMUSG00000026475	Rgs16	100.089	-0.222585	0.367362	-0.6059	0.544581	0.717028	3.635	3.921
ENSMUSG00000099568	Gm28513	1.52893	0.870603	2.09296	0.415968	0.677433	NA	0.096	0.053
ENSMUSG00000066800	Rnasel	129.973	0.713931	0.49178	1.45173	0.146577	0.311423	2.359	1.385
ENSMUSG00000042641	Rgsl1	7.68346	0.260651	0.825575	0.315721	0.752215	0.863584	0.026	0.02
ENSMUSG00000045968	Teddm2	44.7711	1.59374	0.397597	4.00842	6.11261e-05	0.00069747	0.309	0.097
ENSMUSG00000026473	Glul	9757.77	0.764598	0.374679	2.04068	0.041283	0.126244	236.779	129.911
ENSMUSG00000100627	A830008E24Rik	27.9715	-1.88436	0.542177	-3.47554	0.000509824	0.00401139	0.026	0.09
ENSMUSG00000004110	Cacna1e	360.656	3.82365	0.621165	6.15561	7.47905e-10	3.82787e-08	0.399	0.026
ENSMUSG00000101880	Gm29282	4.9788	0.709609	0.893815	0.79391	0.427248	0.621684	0.023	0.013
ENSMUSG00000096950	Gm9530	32.4555	-0.249803	0.361757	-0.690526	0.489863	0.673395	0.339	0.379
ENSMUSG00000056708	Ier5	740.094	-0.267175	0.390351	-0.684448	0.493692	0.676465	51.896	57.495
ENSMUSG00000026471	Mr1	109.743	-0.552991	0.302941	-1.82541	0.0679391	0.182477	0.899	1.222
ENSMUSG00000026470	Stx6	2159.91	0.0522906	0.184031	0.284139	0.776304	0.879161	9.356	8.464
ENSMUSG00000033722	BC034090	5822.97	-0.154786	0.186538	-0.829785	0.40666	0.603158	38.927	40.333
ENSMUSG00000103670	Gm37622	8.68685	0.563153	0.693498	0.812048	0.416764	0.612528	1.194	0.763
ENSMUSG00000026469	Xpr1	2386.65	-0.145412	0.192743	-0.754436	0.450588	0.641633	3.267	3.364
ENSMUSG00000073535	Gm5532	2.80926	1.54	1.21772	1.26466	0.205995	0.392308	0.17	0.056
ENSMUSG00000033701	Acbd6	725.059	-0.22433	0.206147	-1.0882	0.276505	0.474267	1.073	1.169
ENSMUSG00000026468	Lhx4	6196.97	-1.16136	0.466532	-2.48934	0.0127981	0.0522705	9.874	20.658
ENSMUSG00000033684	Qsox1	1601.31	-0.487861	0.379264	-1.28634	0.198325	0.382452	7.04	9.224
ENSMUSG00000102558	Gm37571	13.2419	-0.777452	0.844851	-0.920224	0.357456	0.557536	0.042	0.069
ENSMUSG00000033671	Cep350	3093.25	0.128236	0.163605	0.783813	0.43315	0.626743	5.217	4.458
ENSMUSG00000102833	Gm9694	11.3317	0.574053	0.592876	0.968252	0.332919	0.533391	2.038	1.288
ENSMUSG00000026466	Tor1aip1	943.362	0.212581	0.206715	1.02838	0.303773	0.50428	6.313	5.121
ENSMUSG00000050565	Tor1aip2	1814.14	0.327341	0.177162	1.84769	0.0646469	0.176271	12.343	9.289
ENSMUSG00000015484	Fam163a	37.0098	0.54379	0.579476	0.938417	0.34803	0.548283	0.079	0.05
ENSMUSG00000060985	Tdrd5	13.5543	1.62499	0.686929	2.36559	0.0180015	0.0680719	0.095	0.029
ENSMUSG00000103705	4930518J20Rik	3.49367	4.548	1.70113	2.67351	0.00750611	0.0345304	0.612	0
ENSMUSG00000026602	Nphs2	1.68234	-0.192916	2.00683	-0.0961302	0.923417	NA	0.02	0.021
ENSMUSG00000026601	Axdnd1	6.29885	0.0467195	0.776342	0.060179	0.952013	0.975587	0.013	0.012
ENSMUSG00000078193	Gm2000	268.517	0.171491	0.370287	0.46313	0.643271	0.791215	136.86	114.624
ENSMUSG00000026600	Soat1	532.542	1.00715	0.212617	4.73694	2.16968e-06	4.10476e-05	2.952	1.366
ENSMUSG00000101523	Csnk2a3	804.553	-0.0604837	0.144337	-0.419045	0.675183	0.813237	60.348	58.852
ENSMUSG00000026596	Abl2	2011.08	0.642051	0.142246	4.51367	6.37152e-06	0.000104413	5.786	3.494
ENSMUSG00000060519	Tor3a	155.236	0.679835	0.232763	2.92072	0.00349227	0.0192702	1.955	1.133
ENSMUSG00000033557	Fam20b	2523.13	0.211398	0.131931	1.60233	0.109082	0.254357	13.854	11.265
ENSMUSG00000046057	Gm15428	1.66995	-0.238711	1.62016	-0.147338	0.882865	NA	1.044	1.186
ENSMUSG00000026594	Ralgps2	3205.57	-0.519303	0.233047	-2.22832	0.0258594	0.0892402	4.221	5.606
ENSMUSG00000033544	Angptl1	12.3079	-0.497415	0.703951	-0.706605	0.479812	0.665206	0.111	0.149
ENSMUSG00000101905	4930439D14Rik	9.041	0.165358	0.697666	0.237016	0.812644	0.898668	6.374	5.328
ENSMUSG00000101768	Gm28694	5.8375	-0.809964	0.913237	-0.886916	0.375124	0.574813	0.01	0.017
ENSMUSG00000026592	Tex35	2.69456	-0.650034	1.22083	-0.53245	0.594414	0.756201	0.036	0.053
ENSMUSG00000070565	Rasal2	1838.03	0.52939	0.262616	2.01583	0.0438173	0.132013	1.462	0.942
ENSMUSG00000049881	2810025M15Rik	811.07	-0.401952	0.242208	-1.65953	0.0970084	0.2343	17.914	22.287
ENSMUSG00000033488	Cryzl2	104.413	-0.606426	0.328286	-1.84725	0.064711	0.17631	0.579	0.833
ENSMUSG00000026589	Sec16b	6.81972	0.881967	0.825282	1.06869	0.285212	0.483932	0.031	0.016
ENSMUSG00000004031	Brinp2	125.665	2.98233	0.768429	3.88108	0.000103994	0.0010914	0.584	0.068
ENSMUSG00000026587	Astn1	336.263	2.29743	0.701932	3.27301	0.00106407	0.00737542	0.447	0.082
ENSMUSG00000103971	Gm37679	2.20461	1.18742	1.50259	0.790249	0.429382	0.623676	0.009	0.004
ENSMUSG00000073530	Pappa2	24.5983	0.542381	1.04801	0.517535	0.604783	0.763336	0.021	0.014
ENSMUSG00000040782	Cop1	2038.84	0.280516	0.132332	2.1198	0.0340231	0.109762	4.289	3.304
ENSMUSG00000015829	Tnr	339.066	3.26411	0.619405	5.26976	1.36601e-07	3.75901e-06	0.377	0.035
ENSMUSG00000090394	4930523C07Rik	32.5706	-0.000893612	0.381566	-0.00234196	0.998131	0.99898	0.193	0.181
ENSMUSG00000026725	Tnn	18.8616	0.766312	1.37003	0.559341	0.575929	0.741485	0.049	0.027
ENSMUSG00000058267	Mrps14	945.17	0.211267	0.132784	1.59106	0.111596	0.258146	29.802	24.064
ENSMUSG00000014226	Cacybp	2415.21	0.161064	0.113128	1.42373	0.154525	0.322552	52.302	43.925
ENSMUSG00000103006	4933417C20Rik	34.5635	0.407484	0.402799	1.01163	0.311714	0.511969	5.36	3.8
ENSMUSG00000026721	Rabgap1l	1179.95	0.428391	0.41458	1.03331	0.301457	0.502141	0.48	0.329
ENSMUSG00000104302	Gm36975	2.29666	1.68527	1.37564	1.22508	0.220544	0.410787	0.004	0.001
ENSMUSG00000040423	Rc3h1	2329.77	0.053111	0.138814	0.382605	0.702012	0.831332	7.363	6.646
ENSMUSG00000026715	Serpinc1	10.9058	0.426865	0.588849	0.724914	0.468505	0.656427	0.106	0.074
ENSMUSG00000043467	Zbtb37	1550.65	-0.366862	0.164694	-2.22754	0.0259114	0.0894052	8.867	10.726
ENSMUSG00000053332	Gas5	1372.19	-0.141527	0.2101	-0.673617	0.500555	0.682706	68.306	70.621
ENSMUSG00000026709	Dars2	958.646	0.506937	0.282221	1.79624	0.0724565	0.191158	8.101	5.307
ENSMUSG00000102864	Gm37634	5.0306	0.134079	0.816015	0.16431	0.869487	0.930868	1.83	1.565
ENSMUSG00000026708	Cenpl	284.947	-0.33927	0.320228	-1.05946	0.289388	0.488587	3.953	4.68
ENSMUSG00000026705	Klhl20	500.835	0.160555	0.140928	1.13928	0.254588	0.450365	2.747	2.303
ENSMUSG00000044835	Ankrd45	92.554	2.82796	0.624982	4.52486	6.04359e-06	0.00010028	1.566	0.203
ENSMUSG00000102817	Gm6185	2.43721	1.37595	1.432	0.96086	0.336623	0.536858	0.016	0.006
ENSMUSG00000026701	Prdx6	1143.11	1.7639	0.288543	6.11311	9.77068e-10	4.8485e-08	34.273	9.401
ENSMUSG00000066755	Tnfsf18	2.53321	-0.498985	1.28405	-0.388601	0.697571	0.828578	0.059	0.077
ENSMUSG00000040323	Gm15429	30.6906	0.0941957	0.399233	0.235942	0.813478	0.899065	5.265	4.653
ENSMUSG00000000817	Fasl	2.89289	0.099445	1.17683	0.0845027	0.932657	0.965227	0.08	0.068
ENSMUSG00000103625	Gm37357	3.10156	-0.136222	1.16022	-0.117411	0.906535	0.951068	0.199	0.207
ENSMUSG00000040297	Suco	2414.37	0.181898	0.224834	0.809035	0.418495	0.614281	8.601	7.169
ENSMUSG00000086277	4930558K02Rik	1.846	-0.138439	1.78865	-0.0773987	0.938306	NA	0.011	0.012
ENSMUSG00000103393	Gm38304	15.4727	0.149681	0.533505	0.280561	0.779048	0.881297	0.055	0.046
ENSMUSG00000040265	Dnm3	464.16	0.365889	0.567873	0.644315	0.519371	0.697576	0.24	0.168
ENSMUSG00000078190	Dnm3os	3.81821	-1.08787	1.54698	-0.703221	0.481918	0.666799	0.061	0.123
ENSMUSG00000026694	Eef1aknmt	400.588	-0.0215105	0.187742	-0.114575	0.908782	0.952239	5.386	5.146
ENSMUSG00000026696	Vamp4	795.982	0.118978	0.274739	0.433058	0.664973	0.805471	6.211	5.32
ENSMUSG00000026697	Myoc	51.9526	1.30165	1.20135	1.08349	0.278593	0.476864	0.35	0.128
ENSMUSG00000040225	Prrc2c	5595.47	0.0621	0.140739	0.441241	0.659039	0.801997	16.611	14.845
ENSMUSG00000026692	Fmo4	1.36725	-1.40202	2.03673	-0.688368	0.491221	NA	0.007	0.016
ENSMUSG00000040181	Fmo1	122.901	-2.1283	0.363919	-5.84827	4.96712e-09	2.07182e-07	0.217	0.876
ENSMUSG00000040170	Fmo2	19.7009	1.00256	0.713347	1.40543	0.159893	0.329729	0.206	0.097
ENSMUSG00000026586	Prrx1	207.546	-1.25726	0.351513	-3.57672	0.000347935	0.00293487	0.367	0.82
ENSMUSG00000040124	Gorab	530.663	-0.13095	0.134273	-0.975253	0.329435	0.530364	6	6.173
ENSMUSG00000102117	Rpsa-ps1	6.01527	-0.672761	0.902588	-0.745369	0.456049	0.645559	1.33	2.009
ENSMUSG00000040113	Mettl11b	1.76845	2.12594	2.31456	0.918505	0.358355	NA	0.027	0.006
ENSMUSG00000026585	Kifap3	3308.39	0.0738938	0.18446	0.400595	0.688718	0.822155	5.228	4.623
ENSMUSG00000026584	Scyl3	525.424	0.335794	0.1565	2.14564	0.0319013	0.105014	5.004	3.71
ENSMUSG00000041406	BC055324	944.366	-0.162556	0.296831	-0.547639	0.58394	0.748209	4.297	4.518
ENSMUSG00000041396	Mettl18	156.948	-0.0310687	0.208149	-0.149262	0.881347	0.937407	13.657	13.051
ENSMUSG00000026582	Sele	7.60513	-0.584978	0.938485	-0.623322	0.533073	0.707991	0.08	0.112
ENSMUSG00000026581	Sell	10.0965	-0.473242	0.913589	-0.518003	0.604456	0.763006	0.057	0.075
ENSMUSG00000026580	Selp	11.8347	-0.434558	0.670921	-0.647703	0.517177	0.696149	0.05	0.063
ENSMUSG00000090081	Gm16587	1.81684	-2.42966	1.86289	-1.30425	0.19215	NA	0.024	0.13
ENSMUSG00000086593	Gm16548	2.0221	-1.54447	2.15309	-0.717331	0.47317	0.6603	0.019	0.055
ENSMUSG00000026579	F5	269.831	-1.44335	0.810598	-1.7806	0.0749777	0.196311	0.266	0.688
ENSMUSG00000040918	Slc19a2	497.508	-0.529848	0.279319	-1.89693	0.0578373	0.161912	4.677	6.363
ENSMUSG00000026578	Ccdc181	904.275	-0.234201	0.225211	-1.03992	0.298378	0.49915	13.425	14.746
ENSMUSG00000026577	Blzf1	1072.63	0.194312	0.136944	1.41892	0.155923	0.324703	13.992	11.414
ENSMUSG00000026575	Nme7	743.3	-0.0699661	0.158989	-0.440068	0.659888	0.802477	1.183	1.161
ENSMUSG00000026576	Atp1b1	2095.17	2.13569	0.333797	6.39817	1.57247e-10	9.60206e-09	42.864	8.976
ENSMUSG00000104011	Gm32391	2.34054	1.14603	1.30427	0.878674	0.379578	0.579124	0.404	0.174
ENSMUSG00000102761	Gm37184	1.32006	-1.60305	1.971	-0.813317	0.416037	NA	0.004	0.013
ENSMUSG00000026574	Dpt	2.20278	0.634126	1.59072	0.398642	0.690157	0.823205	0.015	0.009
ENSMUSG00000103659	Gm32569	8.20329	0.0634924	0.725837	0.0874747	0.930294	0.964242	0.019	0.017
ENSMUSG00000104117	Gm20743	41.256	-0.0346309	0.633516	-0.0546645	0.956406	0.977677	0.109	0.102
ENSMUSG00000026573	Xcl1	2.10314	-1.47728	1.70952	-0.864148	0.387507	0.585613	0.036	0.095
ENSMUSG00000040848	Sft2d2	674.516	-0.194274	0.242045	-0.802637	0.422184	0.617181	6.064	6.485
ENSMUSG00000040843	Tiprl	1045.31	0.0690801	0.132148	0.522748	0.60115	0.760748	9.397	8.403
ENSMUSG00000040836	Gpr161	77.4541	0.345471	0.474255	0.72845	0.466338	0.654777	0.637	0.464
ENSMUSG00000026571	Dcaf6	1278.23	0.123229	0.190935	0.645399	0.518669	0.697106	2.108	1.809
ENSMUSG00000026568	Mpc2	1171.13	0.162635	0.166805	0.975	0.32956	0.530426	12.424	10.35
ENSMUSG00000026567	Adcy10	10.4614	-0.0630339	0.658531	-0.0957189	0.923744	0.96046	0.023	0.022
ENSMUSG00000026566	Mpzl1	299.119	-0.114863	0.193382	-0.59397	0.552532	0.723301	1.688	1.704
ENSMUSG00000040723	Rcsd1	154.099	-0.745937	0.361073	-2.06589	0.0388388	0.121023	0.318	0.494
ENSMUSG00000040713	Creg1	516.39	0.0773924	0.284059	0.272452	0.785275	0.88453	8.972	7.877
ENSMUSG00000089829	Gm16565	6.9013	-0.645993	1.05066	-0.614846	0.538656	0.712775	0.126	0.183
ENSMUSG00000005763	Cd247	56.7601	-1.55613	0.53232	-2.9233	0.00346348	0.0191368	0.076	0.21
ENSMUSG00000103768	Gm37856	1.95534	-3.77012	2.00098	-1.88414	0.0595467	NA	0.07	0.931
ENSMUSG00000026565	Pou2f1	3086.69	-0.616543	0.185949	-3.31566	0.00091426	0.00651387	3.635	5.209
ENSMUSG00000097196	Gm26665	14.1237	-0.994499	0.66281	-1.50043	0.133503	0.291991	0.061	0.114
ENSMUSG00000026564	Dusp27	6.97453	-0.641988	1.05027	-0.611259	0.541028	0.715095	0.047	0.066
ENSMUSG00000040612	Ildr2	799.064	-0.10366	0.548266	-0.189069	0.850039	0.919771	2.504	2.452
ENSMUSG00000103400	Gm15853	13.6721	0.412538	0.585077	0.7051	0.480748	0.66621	1.295	0.919
ENSMUSG00000026563	Tada1	1221.03	-0.0472611	0.146754	-0.322043	0.74742	0.860524	17.453	16.931
ENSMUSG00000040596	Pogk	3226.86	-0.0928001	0.147207	-0.630404	0.528431	0.704563	27.943	27.998
ENSMUSG00000084093	Gm16418	89.1339	-0.270605	0.265832	-1.01795	0.3087	0.508754	92.669	104.606
ENSMUSG00000103073	Gm37904	16.7104	1.82183	0.899967	2.02433	0.0429359	0.130078	17.47	4.624
ENSMUSG00000086925	Gm6286	21.356	0.0719021	0.555467	0.129444	0.897006	0.945785	5.724	5.079
ENSMUSG00000102548	Gm16701	8.74526	1.65558	0.843615	1.96248	0.0497061	0.145112	0.129	0.039
ENSMUSG00000097823	Gm16701	21.1503	0.843301	0.47227	1.78564	0.0741582	0.194468	2.174	1.137
ENSMUSG00000060568	Fam78b	879.348	2.05486	0.343994	5.97353	2.32178e-09	1.0512e-07	3.746	0.842
ENSMUSG00000026558	Uck2	2151.42	0.44718	0.300952	1.48588	0.13731	0.29746	9.066	6.184
ENSMUSG00000103139	Gm37982	7.36984	0.952083	1.10165	0.864231	0.387461	0.585585	0.254	0.12
ENSMUSG00000102909	Gm2453	5.77712	-0.333046	0.826429	-0.402994	0.686953	0.820978	0.276	0.323
ENSMUSG00000052428	Tmco1	1542.6	0.112338	0.139475	0.805433	0.42057	0.615971	13.347	11.529
ENSMUSG00000026687	Aldh9a1	544.883	0.0804568	0.243111	0.330946	0.740685	0.856204	5.633	5.005
ENSMUSG00000026688	Mgst3	810.743	0.0526627	0.321224	0.163944	0.869775	0.930938	6.804	6.173
ENSMUSG00000040485	Lrrc52	7.53776	-1.41973	0.908301	-1.56306	0.118039	0.268505	0.033	0.082
ENSMUSG00000015843	Rxrg	5204.46	-1.22748	0.407125	-3.01499	0.00256988	0.0150382	15.076	33.015
ENSMUSG00000026686	Lmx1a	290.202	-0.929992	0.796217	-1.16801	0.242801	0.436696	0.1	0.18
ENSMUSG00000093538	Gm20711	1.54632	2.49961	2.04965	1.21953	0.222645	NA	0.004	0.001
ENSMUSG00000052534	Pbx1	3079.39	0.114535	0.222598	0.514537	0.606877	0.765104	2.045	1.756
ENSMUSG00000026683	Nuf2	1399.85	0.0201659	0.332454	0.0606578	0.951632	0.975381	10.284	9.461
ENSMUSG00000026678	Rgs5	3074.35	0.887601	0.500306	1.77412	0.0760438	0.198459	18.91	9.334
ENSMUSG00000038530	Rgs4	435.854	4.03558	0.633427	6.37102	1.87773e-10	1.11762e-08	39.092	2.194
ENSMUSG00000070532	Ccdc190	50.2847	1.20947	0.505968	2.39041	0.0168294	0.0645225	2.656	1.064
ENSMUSG00000026675	Hsd17b7	588.91	-0.280937	0.16584	-1.69403	0.0902603	0.223243	5.566	6.33
ENSMUSG00000097503	3110045C21Rik	21.3916	-0.0326491	0.500897	-0.0651812	0.94803	0.973341	1.649	1.598
ENSMUSG00000026674	Ddr2	358.007	-1.5202	0.340787	-4.46085	8.16356e-06	0.000128104	0.249	0.658
ENSMUSG00000026670	Uap1	1543.61	0.182688	0.125783	1.4524	0.146391	0.311152	10.509	8.671
ENSMUSG00000104266	Gm37748	24.677	0.617474	0.471309	1.31013	0.190153	0.371797	6.205	3.812
ENSMUSG00000026667	Uhmk1	3304	0.697822	0.231743	3.01119	0.00260229	0.0151859	34.465	19.835
ENSMUSG00000044306	4930500M09Rik	2.84431	0.878271	1.19447	0.735278	0.46217	0.651385	0.577	0.299
ENSMUSG00000096964	Gm6345	6.80418	-0.0752587	0.711145	-0.105827	0.915719	0.955963	0.859	0.856
ENSMUSG00000102418	Sh2d1b1	21.3876	3.93298	0.90555	4.3432	1.40422e-05	0.000199825	0.646	0.04
ENSMUSG00000102752	Gm7694	19.8197	-1.1661	0.512071	-2.27721	0.0227734	0.0811201	0.238	0.499
ENSMUSG00000038473	Nos1ap	262.086	1.67261	0.531493	3.14699	0.00164958	0.0105502	0.346	0.1
ENSMUSG00000102193	Gm7299	1.36712	-1.28049	1.54138	-0.83074	0.40612	NA	0.357	0.813
ENSMUSG00000038463	Olfml2b	78.322	1.17996	0.613818	1.92233	0.0545641	0.155168	0.571	0.229
ENSMUSG00000026663	Atf6	2596.58	0.192049	0.105602	1.81862	0.06897	0.184358	3.503	2.868
ENSMUSG00000053925	Gm9929	45.2076	-0.16036	0.332892	-0.481718	0.630006	0.781844	0.809	0.849
ENSMUSG00000026659	Dusp12	248.951	0.368551	0.157332	2.3425	0.0191548	0.071218	4.974	3.611
ENSMUSG00000096968	Gm26620	2.76566	-0.077107	1.19472	-0.0645396	0.948541	0.973535	0.765	0.76
ENSMUSG00000070524	Fcrlb	1.39081	3.4184	2.14076	1.59682	0.110306	NA	0.073	0
ENSMUSG00000038421	Fcrla	6.94987	2.82518	1.1839	2.38633	0.0170177	0.0650646	0.298	0.041
ENSMUSG00000026656	Fcgr2b	117.793	1.41074	0.311358	4.53091	5.87304e-06	9.79102e-05	1.85	0.649
ENSMUSG00000059089	Fcgr4	157.001	3.58144	0.824722	4.3426	1.40808e-05	0.00020024	4.164	0.33
ENSMUSG00000059498	Fcgr3	256.975	1.37552	0.257827	5.33504	9.55209e-08	2.75748e-06	5.977	2.136
ENSMUSG00000026649	Cfap126	123.882	0.508314	0.442635	1.14838	0.250812	0.446068	1.782	1.162
ENSMUSG00000058076	Sdhc	2975.73	0.0884211	0.234267	0.377437	0.705849	0.833458	27.055	23.904
ENSMUSG00000056569	Mpz	21.1466	-1.15278	0.700068	-1.64667	0.0996264	0.23861	0.126	0.264
ENSMUSG00000038370	Pcp4l1	350.775	-0.66884	0.461814	-1.44829	0.147537	0.312709	2.546	3.748
ENSMUSG00000005677	Nr1i3	3.39429	0.988136	1.04878	0.942179	0.346101	0.546219	0.165	0.077
ENSMUSG00000005674	Tomm40l	757.196	1.02121	0.170489	5.98989	2.09986e-09	9.54805e-08	32.274	14.822
ENSMUSG00000005681	Apoa2	11.5369	0.819756	0.814215	1.00681	0.314028	0.51446	2.253	1.191
ENSMUSG00000058715	Fcer1g	186.743	2.07971	0.409911	5.07357	3.90416e-07	9.46514e-06	11.946	2.658
ENSMUSG00000013593	Ndufs2	5432.47	-0.0530331	0.161641	-0.328092	0.742842	0.857653	71.976	69.666
ENSMUSG00000006403	Adamts4	116.762	0.752318	0.478147	1.57341	0.115625	0.264618	2.794	1.534
ENSMUSG00000052423	B4galt3	744.834	0.203064	0.141165	1.43849	0.150295	0.316718	26.319	21.496
ENSMUSG00000062729	Ppox	387.96	0.120539	0.143809	0.838185	0.401927	0.598821	17.604	15.164
ENSMUSG00000053483	Usp21	784.757	0.131588	0.191218	0.688155	0.491355	0.674552	27.368	23.354
ENSMUSG00000062963	Ufc1	1511.07	0.121762	0.175352	0.694385	0.487441	0.671284	51.188	44.224
ENSMUSG00000079137	Rpl27-ps1	3.62477	1.318	1.13329	1.16299	0.244833	0.439232	2.891	1.086
ENSMUSG00000103983	Gm20045	38.3893	0.359364	0.377705	0.951443	0.34138	0.541632	1.9	1.391
ENSMUSG00000013973	Dedd	648.85	0.152241	0.20433	0.745074	0.456227	0.645758	10.685	9.046
ENSMUSG00000013997	Nit1	742.931	0.314109	0.155582	2.01893	0.0434944	0.131395	23.494	17.704
ENSMUSG00000006412	Pfdn2	514.749	0.516182	0.15497	3.33085	0.000865807	0.00625916	9.848	6.467
ENSMUSG00000045259	Klhdc9	29.2504	-1.36055	0.577194	-2.35719	0.0184139	0.0692532	1.671	3.982
ENSMUSG00000006411	Nectin4	34.0332	1.82106	0.457029	3.98457	6.76037e-05	0.000760326	0.669	0.175
ENSMUSG00000048865	Arhgap30	120.699	1.48068	0.372971	3.96996	7.18842e-05	0.000803351	1.461	0.492
ENSMUSG00000026641	Usf1	1070.12	0.585332	0.136142	4.29941	1.71253e-05	0.000236704	35.721	22.368
ENSMUSG00000103711	Tstd1	8.69537	0.669438	0.64437	1.0389	0.29885	0.49971	1.45	0.857
ENSMUSG00000038235	F11r	148.455	0.408113	0.307055	1.32912	0.183808	0.36298	1.368	0.954
ENSMUSG00000091993	B930036N10Rik	62.6531	0.450505	0.407803	1.10471	0.269285	0.466316	5.389	3.645
ENSMUSG00000060244	Alyref2	100.561	1.13219	0.294615	3.84297	0.000121556	0.00124188	22.026	9.366
ENSMUSG00000004709	Cd244a	27.5711	3.42607	0.776371	4.41293	1.01981e-05	0.00015334	0.16	0.014
ENSMUSG00000004707	Ly9	39.6224	2.61578	0.422436	6.19213	5.9355e-10	3.12854e-08	0.704	0.107
ENSMUSG00000038179	Slamf7	64.0682	3.4225	0.643934	5.31499	1.06662e-07	3.02146e-06	0.843	0.075
ENSMUSG00000015355	Cd48	41.3334	1.72066	0.43496	3.95592	7.6242e-05	0.000846279	0.506	0.143
ENSMUSG00000059058	Tma7-ps	454.186	-1.33018	0.414759	-3.20711	0.00134075	0.0089283	288.283	696.087
ENSMUSG00000015316	Slamf1	1.83711	1.29047	1.87491	0.688281	0.491276	NA	0.018	0.007
ENSMUSG00000038147	Cd84	124.426	1.15912	0.399711	2.8999	0.00373281	0.0203308	0.642	0.267
ENSMUSG00000104413	Gm37065	1.15004	1.52491	1.78444	0.85456	0.392795	NA	0.044	0.015
ENSMUSG00000015314	Slamf6	7.98918	1.82264	0.838724	2.17311	0.0297721	0.099562	0.074	0.02
ENSMUSG00000026556	Vangl2	304.868	0.73265	0.410178	1.78617	0.0740711	0.194273	3.358	1.907
ENSMUSG00000051251	Nhlh1	17.0059	-0.563934	0.630986	-0.893734	0.371464	0.571447	0.614	0.848
ENSMUSG00000003458	Ncstn	1223.49	-0.137919	0.143031	-0.964262	0.334914	0.535141	15.48	15.925
ENSMUSG00000026553	Copa	11035.5	-0.0808468	0.142054	-0.569125	0.569271	0.736943	54.943	54.393
ENSMUSG00000003464	Pex19	2720.88	-0.254667	0.161126	-1.58055	0.113981	0.261955	56.852	63.543
ENSMUSG00000089803	Gm10171	19.2049	0.0945565	0.563249	0.167877	0.86668	0.929168	5.962	5.177
ENSMUSG00000026554	Dcaf8	4885.18	0.0638432	0.216782	0.294504	0.768373	0.87392	21.084	18.906
ENSMUSG00000013698	Pea15a	10176.2	-0.158159	0.214443	-0.737534	0.460798	0.650057	191.216	199.037
ENSMUSG00000007122	Casq1	45.1616	-1.06959	0.325838	-3.2826	0.00102856	0.00718569	0.722	1.412
ENSMUSG00000092085	Gm17224	4.31759	-0.362021	0.978663	-0.369914	0.711447	0.836921	0.837	0.998
ENSMUSG00000038034	Igsf8	1826.01	-0.336565	0.232519	-1.44747	0.147765	0.313131	6.809	7.968
ENSMUSG00000007097	Atp1a2	2579.56	1.86949	0.412474	4.53239	5.83192e-06	9.73778e-05	33.555	8.395
ENSMUSG00000038026	Kcnj9	114.527	6.01092	0.99121	6.06423	1.3259e-09	6.31579e-08	7.437	0.106
ENSMUSG00000044708	Kcnj10	282.372	3.28141	0.591115	5.55122	2.83683e-08	9.57159e-07	3.743	0.348
ENSMUSG00000050229	Pigm	948.635	0.2604	0.158946	1.63829	0.10136	0.241561	30.135	23.627
ENSMUSG00000102278	Gm37145	1.27961	1.57206	1.96842	0.798643	0.424497	NA	0.201	0.065
ENSMUSG00000026548	Slamf9	47.351	3.28338	0.617256	5.31932	1.04155e-07	2.96234e-06	3.815	0.374
ENSMUSG00000037995	Igsf9	322.708	2.87239	0.387443	7.41371	1.2281e-13	1.44568e-11	8.212	1.066
ENSMUSG00000026547	Tagln2	498.66	0.955943	0.485599	1.96858	0.0490008	0.143766	20.223	9.716
ENSMUSG00000104351	Gm37125	1.66373	2.21117	1.60002	1.38197	0.166982	NA	0.402	0.081
ENSMUSG00000026546	Cfap45	43.3253	-0.385164	0.791892	-0.486385	0.626695	0.779493	0.327	0.401
ENSMUSG00000085184	4933439K11Rik	8.78249	2.02566	1.20925	1.67513	0.0939089	0.229244	0.183	0.041
ENSMUSG00000049598	Vsig8	29.0386	5.82912	1.16913	4.98586	NA	NA	2.238	0.036
ENSMUSG00000053318	Slamf8	19.3636	3.97457	0.851981	4.6651	3.08473e-06	5.5913e-05	0.843	0.051
ENSMUSG00000026544	Dusp23	112.765	0.949094	0.571597	1.66043	0.0968289	0.234053	15.335	7.224
ENSMUSG00000060128	Gm2710	1.42857	-0.74483	1.69117	-0.440422	0.659631	NA	0.342	0.545
ENSMUSG00000037942	Crp	152.011	2.27559	1.24689	1.82501	0.0679998	0.182594	0.431	0.083
ENSMUSG00000102701	9430083B18Rik	11.5163	2.93466	1.1518	2.5479	0.0108374	0.0458992	5.633	0.672
ENSMUSG00000037924	Olfr16	2.94805	1.88508	1.6059	1.17385	0.240456	0.434025	0.131	0.032
ENSMUSG00000037872	Ackr1	357.39	-0.385838	0.401866	-0.960117	0.336996	0.537282	23.742	29.02
ENSMUSG00000005338	Cadm3	9113.79	-0.252362	0.373443	-0.675772	0.499186	0.681447	44.495	49.104
ENSMUSG00000037860	Aim2	148.186	1.09037	0.622859	1.75059	0.0800166	0.205512	0.389	0.176
ENSMUSG00000037849	Ifi206	12.8686	4.33283	1.07698	4.02314	5.74265e-05	0.000663112	0.185	0.008
ENSMUSG00000070501	Ifi214	2.96114	1.64411	1.46628	1.12128	0.262168	0.458453	0.039	0.011
ENSMUSG00000073491	Ifi213	26.3715	2.84846	0.711124	4.00558	6.18667e-05	0.000704024	0.284	0.038
ENSMUSG00000043263	Ifi209	61.8043	2.56283	0.585915	4.37407	1.21952e-05	0.000177475	1.149	0.186
ENSMUSG00000066677	Ifi208	13.7351	2.73522	0.744341	3.67468	0.000238147	0.00214453	0.149	0.021
ENSMUSG00000073490	Ifi207	48.9228	1.63486	0.42828	3.81727	0.000134938	0.00134424	0.649	0.196
ENSMUSG00000073489	Ifi204	102.936	2.77975	0.578091	4.80851	1.52062e-06	3.03395e-05	1.854	0.258
ENSMUSG00000090222	Ifi203-ps	2.91676	0.80095	1.12048	0.714827	0.474716	0.661854	0.041	0.022
ENSMUSG00000090272	Mndal	51.3472	0.938722	0.653033	1.43748	0.150581	0.317008	0.329	0.166
ENSMUSG00000026536	Ifi211	21.5441	2.79635	0.625628	4.46967	7.83419e-06	0.000124614	0.444	0.06
ENSMUSG00000039997	Ifi203	51.502	0.826329	0.521794	1.58363	0.113278	0.260924	0.454	0.243
ENSMUSG00000026535	Ifi202b	4.59729	-4.38582	1.52569	-2.87463	0.00404495	0.0215705	0.003	0.071
ENSMUSG00000054203	Ifi205	13.8006	1.5924	1.12299	1.418	0.156192	0.325103	0.197	0.064
ENSMUSG00000026532	Spta1	35.3193	-4.92292	0.850738	-5.78665	7.18059e-09	2.87617e-07	0.008	0.235
ENSMUSG00000028354	Fmn2	257.314	1.16321	0.354872	3.27783	0.0010461	0.00728047	0.286	0.118
ENSMUSG00000050069	Grem2	40.2618	3.1548	0.762452	4.1377	3.50804e-05	0.000435198	0.242	0.025
ENSMUSG00000026527	Rgs7	875.262	0.685467	0.313507	2.18645	0.0287829	0.0969295	0.485	0.285
ENSMUSG00000026526	Fh1	2132.59	-0.0951397	0.181923	-0.522968	0.600996	0.760748	17.272	17.202
ENSMUSG00000039783	Kmo	14.804	0.687863	0.638161	1.07788	0.281086	0.479508	0.073	0.043
ENSMUSG00000026525	Opn3	41.043	-1.06596	0.357269	-2.98362	0.00284856	0.016313	0.198	0.386
ENSMUSG00000039748	Exo1	1099.56	-0.0336314	0.429125	-0.0783721	0.937532	0.967482	7.889	7.571
ENSMUSG00000055214	Pld5	41.5066	-0.87829	0.392864	-2.23561	0.0253774	0.0880934	0.013	0.023
ENSMUSG00000057335	Cep170	2217.8	0.291174	0.199197	1.46174	0.143812	0.30711	6.678	5.137
ENSMUSG00000103435	Gm36992	1.64638	0.816876	1.57695	0.518011	0.60445	NA	0.08	0.042
ENSMUSG00000026504	Sdccag8	833.567	0.634924	0.189375	3.35274	0.000800152	0.00586861	1.101	0.669
ENSMUSG00000087082	Gm15423	6.78015	3.6562	1.38596	2.63803	0.00833904	0.0374912	0.773	0.058
ENSMUSG00000019699	Akt3	6154.12	0.270214	0.152476	1.77217	0.076366	0.199055	6.37	4.947
ENSMUSG00000097892	Gm26801	119.41	-0.401803	0.374206	-1.07375	0.282936	0.481227	1.512	1.861
ENSMUSG00000063659	Zbtb18	4154.88	-0.111016	0.203478	-0.545591	0.585347	0.749014	101.622	102.501
ENSMUSG00000015962	1700016C15Rik	1.5988	-1.02304	1.89824	-0.53894	0.589928	NA	0.009	0.017
ENSMUSG00000015961	Adss	1582.18	-0.0339454	0.209375	-0.162128	0.871205	0.931569	9.942	9.583
ENSMUSG00000102483	Catspere1	21.1168	-4.58368	1.216	-3.76946	0.0001636	0.00157569	0.003	0.067
ENSMUSG00000091476	Catspere2	796.829	-0.378908	0.343908	-1.10177	0.270561	0.467764	0.599	0.72
ENSMUSG00000104097	Gm37313	1.85521	-0.206419	1.25126	-0.164969	0.868969	NA	0.046	0.049
ENSMUSG00000026502	Desi2	1717.2	0.0108739	0.155405	0.0699715	0.944216	0.971261	5.314	4.937
ENSMUSG00000070489	4930527J03Rik	1.35436	-0.0607957	1.60959	-0.0377709	0.96987	NA	0.585	0.564
ENSMUSG00000104126	Gm37486	146.247	-0.562599	0.271616	-2.0713	0.0383305	0.120075	66.456	92.923
ENSMUSG00000086350	B230369F24Rik	389.403	0.246667	0.199617	1.2357	0.21657	0.405718	15.512	12.334
ENSMUSG00000026500	Cox20	495.814	-0.676496	0.275672	-2.45398	0.0141283	0.0562928	21.795	32.79
ENSMUSG00000039630	Hnrnpu	18242	-0.0288756	0.144226	-0.200211	0.841315	0.914843	237.359	226.468
ENSMUSG00000104279	Gm38300	20.6377	0.058491	0.559788	0.104488	0.916782	0.956699	1.667	1.485
ENSMUSG00000026495	Efcab2	343.995	-0.447576	0.303333	-1.47552	0.140072	0.301624	0.724	0.929
ENSMUSG00000026494	Kif26b	1633.53	0.0896362	0.442927	0.202372	0.839626	0.913991	0.971	0.864
ENSMUSG00000089713	Gm16564	2.4791	-0.206698	1.26789	-0.163025	0.870499	0.931185	0.026	0.028
ENSMUSG00000055067	Smyd3	1250.41	-0.19163	0.30053	-0.63764	0.523708	0.700559	0.417	0.447
ENSMUSG00000096474	Gm5561	33.4424	0.417818	0.505918	0.825861	0.408883	0.6051	17.598	12.191
ENSMUSG00000026492	Tfb2m	438.479	0.435823	0.226526	1.92394	0.054362	0.154758	5.813	4.055
ENSMUSG00000038949	Cnst	2298.88	0.162335	0.215584	0.753002	0.451448	0.642234	6.088	5.094
ENSMUSG00000038936	Sccpdh	1546.62	0.602926	0.193382	3.1178	0.00182206	0.0114596	20.781	12.909
ENSMUSG00000087236	Kif28	22.6854	1.78236	0.634056	2.81104	0.0049381	0.025225	0.167	0.045
ENSMUSG00000026491	Ahctf1	3803.91	0.243949	0.11188	2.18046	0.0292231	0.0981313	14.879	11.783
ENSMUSG00000073486	Gm10518	8.42597	0.228665	0.695522	0.328767	0.742332	0.857508	1.595	1.272
ENSMUSG00000104418	Gm37070	4.88695	0.270446	1.27216	0.212588	0.831649	0.909184	2.859	2.265
ENSMUSG00000026490	Cdc42bpa	3950.57	0.0898736	0.178045	0.50478	0.613713	0.769967	4.208	3.681
ENSMUSG00000026489	Coq8a	634.127	-0.383307	0.300948	-1.27367	0.202782	0.388108	3.305	4.032
ENSMUSG00000010609	Psen2	285.787	0.456342	0.214797	2.12452	0.0336264	0.108813	1.842	1.27
ENSMUSG00000102923	Gm31728	17.7029	1.29018	0.588624	2.19186	0.0283898	0.0959414	0.296	0.114
ENSMUSG00000055676	Gm5069	203.666	0.495362	0.386909	1.28031	0.200438	0.385152	10.843	7.246
ENSMUSG00000038855	Itpkb	1423.49	0.376576	0.370874	1.01537	0.309927	0.510061	2.944	2.155
ENSMUSG00000053963	Stum	195.921	3.87713	0.512096	7.57111	3.70057e-14	4.84021e-12	2.183	0.137
ENSMUSG00000026496	Parp1	5070.62	0.11665	0.244882	0.47635	0.633825	0.784821	36.352	31.513
ENSMUSG00000058729	Lin9	740.834	0.131155	0.20327	0.645225	0.518781	0.697106	3.735	3.183
ENSMUSG00000026499	Acbd3	1667.13	0.0983793	0.140911	0.698167	0.485073	0.669654	12.589	11.026
ENSMUSG00000103649	Gm37768	9.23801	1.12946	0.786986	1.43517	0.15124	0.317918	0.231	0.101
ENSMUSG00000103156	Gm38293	43.5273	0.992506	0.376066	2.63918	0.00831073	0.0374036	2.456	1.168
ENSMUSG00000060743	H3f3a	12711.2	-0.232651	0.184802	-1.25892	0.208058	0.395027	199.501	219.188
ENSMUSG00000073485	H3f3aos	115.046	0.219742	0.298681	0.735709	0.461908	0.651145	9.713	7.883
ENSMUSG00000038806	Sde2	1576.5	-0.0808379	0.160044	-0.505097	0.61349	0.76987	19.063	18.92
ENSMUSG00000103979	Gm20305	80.9466	-0.795373	1.11389	-0.714048	0.475198	0.662214	92.911	148.716
ENSMUSG00000026520	Pycr2	669.48	0.666793	0.194899	3.42123	0.000623386	0.00475979	48.894	28.938
ENSMUSG00000038793	Lefty1	4.64164	0.37812	1.02343	0.369464	0.711782	0.837071	0.265	0.191
ENSMUSG00000026519	Tmem63a	81.0461	0.558889	0.319511	1.7492	0.0802559	0.205977	0.586	0.369
ENSMUSG00000038776	Ephx1	306.435	-0.154354	0.453576	-0.340305	0.733627	0.850978	0.693	0.717
ENSMUSG00000026516	Nvl	1481.06	0.0945398	0.149817	0.631035	0.528018	0.704367	5.831	5.099
ENSMUSG00000062169	Cnih4	1261.63	0.310531	0.131658	2.35863	0.0183427	0.0690345	12.042	9.114
ENSMUSG00000038733	Wdr26	4470.04	0.0442036	0.134509	0.32863	0.742435	0.857581	26.451	24.056
ENSMUSG00000054135	A430110L20Rik	7.19537	0.25338	0.857834	0.295372	0.76771	0.873443	0.714	0.57
ENSMUSG00000081214	Rpl35a-ps2	12.3499	0.134839	0.620863	0.217181	0.828068	0.907423	8.335	7.153
ENSMUSG00000026514	Cnih3	58.6053	3.89807	0.75113	5.18961	2.10733e-07	5.53311e-06	0.314	0.019
ENSMUSG00000050625	Ccdc121	7.83939	-0.768223	1.56309	-0.491479	0.623088	0.776898	0.653	1.058
ENSMUSG00000047369	Dnah14	3.87353	1.30068	1.20347	1.08077	0.279797	0.478311	0.007	0.003
ENSMUSG00000004880	Lbr	4434.66	-0.144882	0.225705	-0.641908	0.520933	0.698655	35.698	36.831
ENSMUSG00000022995	Enah	4052.72	0.326869	0.174971	1.86813	0.0617436	0.170217	7.395	5.521
ENSMUSG00000026511	Srp9	1141.73	0.586829	0.18567	3.1606	0.00157444	0.0101695	38.299	24.051
ENSMUSG00000038633	Degs1	1662.43	0.183371	0.244645	0.749537	0.453534	0.643842	45.36	37.243
ENSMUSG00000100147	1700047M11Rik	5.91817	-0.244349	0.916189	-0.266701	0.789699	0.886668	0.077	0.083
ENSMUSG00000047539	Fbxo28	1703.82	-0.0507313	0.18678	-0.27161	0.785922	0.884768	12.059	11.763
ENSMUSG00000073482	Gm10517	24.5206	0.818379	0.612563	1.33599	0.181552	0.360121	8.433	4.556
ENSMUSG00000026510	Trp53bp2	1689.24	-0.402119	0.238426	-1.68656	0.0916885	0.225564	5.178	6.407
ENSMUSG00000026509	Capn2	1022.16	0.479596	0.142001	3.3774	0.000731742	0.00545179	4.504	3.035
ENSMUSG00000102234	Gm37885	87.0629	0.784453	0.409827	1.91411	0.0556063	0.157057	1.783	0.976
ENSMUSG00000104415	Gm37069	17.7245	1.0908	0.797856	1.36716	0.171574	0.34571	0.705	0.308
ENSMUSG00000038599	Capn8	2.26057	3.54217	1.70613	2.07615	0.0378803	0.118911	0.013	0.001
ENSMUSG00000038576	Susd4	277.907	3.80834	0.411891	9.246	2.33062e-20	9.68302e-18	0.996	0.066
ENSMUSG00000079164	Tlr5	3.96524	-0.7775	0.873443	-0.890155	0.373383	0.573281	0.036	0.058
ENSMUSG00000030768	Disp1	246.442	-0.425769	0.282225	-1.50862	0.131397	0.288904	0.281	0.354
ENSMUSG00000046836	Brox	1916.51	0.141064	0.142944	0.986847	0.323717	0.524707	21.389	18.263
ENSMUSG00000042901	Aida	771.326	0.0454182	0.18064	0.251429	0.801483	0.89185	5.839	5.306
ENSMUSG00000056050	Mia3	4082.39	0.745546	0.170916	4.36206	1.28843e-05	0.00018622	25.418	14.269
ENSMUSG00000103415	Gm37339	1.98354	1.78871	1.5414	1.16045	0.245867	NA	2.295	0.639
ENSMUSG00000072258	Taf1a	333.223	0.231051	0.195476	1.18199	0.23721	0.430513	3.623	2.899
ENSMUSG00000104212	Gm37986	3.64861	0.176726	1.29357	0.136619	0.891332	0.942869	2.338	1.879
ENSMUSG00000053461	Hhipl2	6.87578	0.174499	0.80672	0.216307	0.828748	0.907746	0.085	0.071
ENSMUSG00000039384	Dusp10	85.6683	0.0710759	0.326568	0.217645	0.827706	0.907073	0.32	0.288
ENSMUSG00000044854	1700056E22Rik	18.4419	-0.190518	0.48878	-0.389783	0.696697	0.827995	3.107	3.365
ENSMUSG00000039377	Hlx	19.0809	0.64792	0.49679	1.30421	0.192161	0.374306	1.011	0.606
ENSMUSG00000026621	Mtarc1	3.79324	0.153928	0.988504	0.155718	0.876255	0.934423	0.028	0.024
ENSMUSG00000073481	Mtarc2	1106.2	0.0656928	0.236801	0.277418	0.781459	0.882358	6.718	6.006
ENSMUSG00000039349	C130074G19Rik	168.103	0.467927	0.435181	1.07525	0.282264	0.480547	3.879	2.589
ENSMUSG00000026620	Mark1	878.571	0.172354	0.225269	0.7651	0.444212	0.636231	2.056	1.711
ENSMUSG00000102784	Gm38251	5.48147	-3.95265	1.45001	-2.72594	0.00641179	0.0306481	0.007	0.104
ENSMUSG00000039318	Rab3gap2	1583.88	0.0822207	0.118407	0.694393	0.487436	0.671284	4.127	3.652
ENSMUSG00000026618	Iars2	1867.15	0.182824	0.134296	1.36135	0.173404	0.348171	9.42	7.767
ENSMUSG00000102526	Gm37785	26.4921	0.684246	0.483117	1.41631	0.156683	0.325583	3.402	1.996
ENSMUSG00000026617	Bpnt1	2177.18	0.425563	0.167092	2.54688	0.010869	0.0460144	19.873	13.891
ENSMUSG00000097261	4930532G15Rik	23.4039	0.843737	0.503586	1.67546	0.0938445	0.229113	2.059	1.091
ENSMUSG00000026615	Eprs	9094.54	0.0391903	0.222333	0.176269	0.860083	0.925518	29.2	26.732
ENSMUSG00000051295	9630028B13Rik	7.07269	-1.29367	0.757853	-1.70702	0.0878176	0.219249	0.072	0.164
ENSMUSG00000097615	Gm2061	4.18966	1.76191	1.76872	0.996151	0.319177	0.519873	0.211	0.055
ENSMUSG00000026614	Slc30a10	39.1126	0.863616	0.575288	1.50119	0.133306	0.29165	0.792	0.401
ENSMUSG00000039246	Lyplal1	758.275	0.242722	0.412724	0.588099	0.556466	0.72634	5.142	4.123
ENSMUSG00000103449	Gm37134	11.0933	0.486477	0.882613	0.551178	0.581512	0.746224	0.068	0.046
ENSMUSG00000103690	A730004F24Rik	1.12534	-0.114638	2.0019	-0.0572646	0.954334	NA	0.006	0.006
ENSMUSG00000039239	Tgfb2	1224.99	1.22698	0.689571	1.77935	0.0751831	0.196674	5.078	2.079
ENSMUSG00000100393	Gm29491	7.45916	1.12736	0.980838	1.14938	0.2504	0.445506	2.08	0.9
ENSMUSG00000001305	Rrp15	479.551	0.547675	0.202835	2.7001	0.00693186	0.032481	4.57	2.954
ENSMUSG00000097784	A430105J06Rik	30.3027	1.03686	0.418864	2.4754	0.0133086	0.0537765	2.455	1.125
ENSMUSG00000097935	Gm3809	1.41409	-1.60704	1.92297	-0.835707	0.40332	NA	0.138	0.386
ENSMUSG00000039224	D1Pas1	3.01444	-3.03825	1.76498	-1.72141	0.0851758	0.2146	0.021	0.18
ENSMUSG00000026611	Spata17	47.9065	-0.702642	0.328411	-2.13952	0.0323935	0.105907	0.042	0.064
ENSMUSG00000039210	Gpatch2	998.543	-0.0381681	0.120372	-0.317084	0.75118	0.862931	1.534	1.472
ENSMUSG00000103923	Gm37896	6.54742	2.13352	0.953123	2.23845	0.0251916	0.0876063	0.14	0.03
ENSMUSG00000026610	Esrrg	2572.38	0.922109	0.348572	2.64539	0.00815974	0.0368885	1.156	0.578
ENSMUSG00000103961	Gm36388	1.27309	3.29226	2.98782	1.10189	0.270509	NA	0.022	0.002
ENSMUSG00000103577	9330162B11Rik	11.377	3.90882	0.973996	4.01317	5.99082e-05	0.000685789	2.184	0.139
ENSMUSG00000026609	Ush2a	15121.7	-0.438791	0.275693	-1.59159	0.111477	0.257926	3.311	4.201
ENSMUSG00000026608	Kctd3	1603.14	0.192004	0.13231	1.45116	0.146735	0.311627	10.717	8.783
ENSMUSG00000037624	Kcnk2	148.424	2.07321	0.326871	6.3426	2.25914e-10	1.29726e-08	0.281	0.063
ENSMUSG00000104507	A430027H14Rik	2.69177	2.47319	1.43442	1.72417	0.0846771	0.213878	0.806	0.139
ENSMUSG00000103087	Gm38122	3.12054	0.450754	1.02921	0.437963	0.661413	0.80364	0.94	0.642
ENSMUSG00000026605	Cenpf	7151.45	-0.507853	0.392451	-1.29406	0.195646	0.379076	30.321	40.16
ENSMUSG00000026604	Ptpn14	139.127	-0.894295	0.360065	-2.4837	0.0130024	0.0528502	0.13	0.222
ENSMUSG00000026603	Smyd2	652.483	1.12367	0.24326	4.61922	3.85181e-06	6.79567e-05	4.155	1.785
ENSMUSG00000010175	Prox1	86.3857	2.42535	0.741011	3.27303	0.00106401	0.00737542	0.589	0.103
ENSMUSG00000079045	Prox1os	2.53689	2.98255	1.78168	1.67401	0.094129	0.229543	0.022	0.003
ENSMUSG00000103510	Gm30725	4.16468	0.352119	1.25598	0.280354	0.779206	0.881362	0.032	0.024
ENSMUSG00000089872	Rps6kc1	1215.6	0.133948	0.227144	0.589707	0.555387	0.725436	1.268	1.077
ENSMUSG00000026634	Angel2	1288.88	0.345142	0.123642	2.79147	0.00524687	0.0263835	14.411	10.623
ENSMUSG00000037568	Vash2	196.821	-0.264252	0.499515	-0.529016	0.596794	0.757895	1.178	1.3
ENSMUSG00000066595	Flvcr1	603.421	0.370228	0.196893	1.88035	0.0600603	0.166682	7.664	5.573
ENSMUSG00000097845	A230020J21Rik	5.47979	1.40186	0.945915	1.48201	0.138337	0.299135	0.47	0.169
ENSMUSG00000057072	Spata45	2.81696	3.0282	1.49697	2.02289	0.0430847	0.130437	0.187	0.023
ENSMUSG00000026632	Tatdn3	271.974	0.315331	0.199023	1.5844	0.113104	0.260636	4.06	3.072
ENSMUSG00000062510	Nsl1	723.49	-0.324537	0.329562	-0.984752	0.324746	0.525913	6.545	7.715
ENSMUSG00000026630	Batf3	14.1757	-0.719466	0.555045	-1.29623	0.194896	0.378139	0.224	0.347
ENSMUSG00000026628	Atf3	323.837	0.730549	0.221111	3.30399	0.000953189	0.00673237	1.642	0.927
ENSMUSG00000073478	D730003I15Rik	49.8588	0.625186	0.400341	1.56163	0.118374	0.269037	6.701	4.135
ENSMUSG00000103685	Gm37074	1.65717	-0.262982	1.4307	-0.183814	0.854159	NA	0.188	0.214
ENSMUSG00000103174	Gm37168	8.19765	2.99348	1.47875	2.02434	0.0429352	0.130078	0.051	0.006
ENSMUSG00000037499	Nenf	1349.44	0.186134	0.188513	0.987379	0.323457	0.52453	25.517	21.065
ENSMUSG00000026627	Pacc1	451.601	0.149409	0.173813	0.859596	0.390012	0.587931	4.147	3.508
ENSMUSG00000026626	Ppp2r5a	1658.98	0.533349	0.128287	4.15746	3.21805e-05	0.000403953	8.038	5.211
ENSMUSG00000103114	Gm32200	14.5906	1.55035	0.547652	2.8309	0.00464167	0.0241001	0.164	0.052
ENSMUSG00000102246	9430037O13Rik	12.0485	-0.130217	0.666353	-0.195417	0.845067	0.917087	2.542	2.599
ENSMUSG00000037474	Dtl	1933.6	-0.110837	0.404699	-0.273876	0.78418	0.884064	11.95	12.18
ENSMUSG00000037461	Ints7	2631.01	0.254667	0.220202	1.15652	0.24747	0.442538	13.248	10.415
ENSMUSG00000026623	Lpgat1	6152.03	0.00357762	0.189535	0.0188757	0.98494	0.99168	18.203	16.873
ENSMUSG00000102840	Gm38037	34.968	0.540909	0.535053	1.01094	0.312043	0.51231	6.365	4.106
ENSMUSG00000026622	Nek2	2550.12	0.221669	0.386118	0.574097	0.565902	0.733997	57.431	46.048
ENSMUSG00000055833	1700034H15Rik	112.3	-0.533189	0.309475	-1.72288	0.0849097	0.214215	0.936	1.265
ENSMUSG00000037434	Slc30a1	2126.84	-0.284781	0.28266	-1.0075	0.313693	0.514046	55.534	63.181
ENSMUSG00000049353	Rd3	3252.25	0.286157	0.232294	1.23187	0.217996	0.40751	70.423	53.555
ENSMUSG00000097416	Gm26670	35.5429	0.7038	0.49286	1.42799	0.153294	0.320948	3.275	1.91
ENSMUSG00000102915	Gm32460	1.5677	0.172039	1.45335	0.118374	0.905771	NA	2.094	1.727
ENSMUSG00000026637	Traf5	418.47	0.565099	0.341338	1.65554	0.097815	0.235576	1.008	0.633
ENSMUSG00000037395	Rcor3	959.832	0.180421	0.175927	1.02554	0.305107	0.505544	5.613	4.622
ENSMUSG00000097316	Gm10516	141.062	0.499285	0.233726	2.1362	0.0326634	0.106543	2.486	1.654
ENSMUSG00000058248	Kcnh1	298.341	2.22422	0.419569	5.30122	1.15033e-07	3.24928e-06	0.395	0.078
ENSMUSG00000037375	Hhat	252.224	-0.358059	0.218586	-1.63807	0.101408	0.241647	0.191	0.229
ENSMUSG00000094131	Gm22265	8.81744	1.36672	0.735809	1.85744	0.0632487	0.173289	26.793	9.645
ENSMUSG00000047384	A730013G03Rik	15.2951	0.370937	0.574016	0.646213	0.518141	0.696852	2.048	1.459
ENSMUSG00000100872	1700065J18Rik	2.3981	1.94388	1.6392	1.18588	0.235671	0.428676	0.509	0.122
ENSMUSG00000016262	Sertad4	471.18	-0.0872031	0.253585	-0.343881	0.730936	0.849382	9.875	9.792
ENSMUSG00000089812	Gm15867	6.17036	0.466333	0.788494	0.591422	0.554238	0.724564	1.409	0.949
ENSMUSG00000016200	Syt14	1478.96	0.125808	0.150064	0.838361	0.401828	0.598724	2.346	2.016
ENSMUSG00000103640	Gm31406	1.69026	0.85362	1.72506	0.494834	0.620717	NA	0.288	0.15
ENSMUSG00000016181	Utp25	463.137	0.221759	0.165789	1.3376	0.181027	0.359425	2.942	2.375
ENSMUSG00000026638	Irf6	3.5045	1.22594	1.30442	0.939834	0.347303	0.547504	0.058	0.023
ENSMUSG00000079144	A130010J15Rik	372.476	0.401994	0.24568	1.63625	0.101787	0.242257	9.202	6.594
ENSMUSG00000037318	Traf3ip3	23.801	1.22509	0.446488	2.74384	0.00607252	0.0294037	0.243	0.097
ENSMUSG00000090080	Gm15872	2.49976	2.87273	1.46812	1.95674	0.0503778	0.146367	0.19	0.023
ENSMUSG00000026639	Lamb3	11.343	1.33033	0.773292	1.72035	0.0853688	0.214933	0.021	0.008
ENSMUSG00000016194	Hsd11b1	26.0304	3.38847	0.84799	3.99589	6.44519e-05	0.000729526	0.201	0.018
ENSMUSG00000009633	G0s2	44.3525	1.18509	0.374977	3.16043	0.00157539	0.0101709	12.77	5.251
ENSMUSG00000016179	Camk1g	627.807	-0.0578631	0.164035	-0.352749	0.724277	0.844547	5.342	5.235
ENSMUSG00000102648	Gm38022	5.72018	1.17334	1.32772	0.883729	0.376843	0.576602	2.073	0.849
ENSMUSG00000102981	Gm38322	4.2726	1.08261	1.35403	0.799549	0.423972	0.618765	0.333	0.143
ENSMUSG00000026640	Plxna2	2003.01	-0.572212	0.292391	-1.95701	0.0503461	0.146328	1.928	2.679
ENSMUSG00000016494	Cd34	364.512	0.818256	0.27629	2.96159	0.00306058	0.0172797	5.063	2.681
ENSMUSG00000097325	Gm16897	43.8705	1.49824	0.582844	2.57056	0.0101533	0.0437127	0.436	0.145
ENSMUSG00000096929	A330023F24Rik	684.392	0.675777	0.361507	1.86933	0.0615768	0.169867	2.179	1.28
ENSMUSG00000104206	Gm32250	3.222	0.362503	1.19813	0.302558	0.762226	0.870148	0.099	0.071
ENSMUSG00000104077	Gm37027	3.46212	1.47353	1.10646	1.33175	0.182943	0.361721	2.765	0.939
ENSMUSG00000016493	Cd46	149.697	-0.413841	0.298742	-1.38528	0.165966	0.338087	0.516	0.64
ENSMUSG00000104010	Gm37366	7.36393	0.415194	0.872913	0.475642	0.63433	0.784821	0.6	0.422
ENSMUSG00000016481	Cr1l	894.671	0.199364	0.167724	1.18864	0.234581	0.427572	5.968	4.871
ENSMUSG00000050530	Fam171a1	691.147	0.163244	0.194263	0.840323	0.400727	0.597622	1.342	1.115
ENSMUSG00000026643	Nmt2	2006.77	-0.153184	0.247167	-0.61976	0.535416	0.710167	9.614	10.031
ENSMUSG00000049950	Rpp38	299.287	0.13513	0.203256	0.66483	0.506159	0.68728	17.514	14.995
ENSMUSG00000026644	Acbd7	24.3537	-0.518901	0.466666	-1.11193	0.266166	0.462765	0.632	0.849
ENSMUSG00000026645	Olah	2.14036	-0.787844	1.47276	-0.534945	0.592688	0.754806	0.004	0.006
ENSMUSG00000026650	Meig1	49.7342	-0.889574	0.597127	-1.48976	0.136288	0.295918	0.503	0.863
ENSMUSG00000026648	Dclre1c	198.149	0.0590251	0.238645	0.247334	0.80465	0.89328	1.06	0.953
ENSMUSG00000026646	Suv39h2	837.905	0.765317	0.459335	1.66614	0.0956854	0.232083	12.901	7.27
ENSMUSG00000085043	Gm13184	4.62363	0.282746	0.999597	0.28286	0.777284	0.879895	0.176	0.133
ENSMUSG00000109865	Hspa14	1656.06	0.247428	0.192179	1.28749	0.197924	0.381949	16.397	13
ENSMUSG00000039496	Cdnf	121.542	0.464932	0.329424	1.41135	0.158142	0.327361	2.218	1.522
ENSMUSG00000026655	Fam107b	6662.55	1.697	0.211203	8.03495	9.36166e-16	1.78706e-13	10.761	3.145
ENSMUSG00000080703	Gm13183	11.835	3.23537	0.782134	4.1366	3.52493e-05	0.000436527	5.777	0.562
ENSMUSG00000085656	Gm13180	3.28305	-0.681186	1.17279	-0.580824	0.561359	0.73018	0.031	0.045
ENSMUSG00000026657	Frmd4a	1483.33	0.0850149	0.191391	0.444195	0.656901	0.800591	0.572	0.502
ENSMUSG00000086018	Gm13179	2.38822	1.5826	1.38092	1.14604	0.251777	0.446851	0.494	0.152
ENSMUSG00000039449	Prpf18	2268.02	0.396565	0.154109	2.57328	0.0100739	0.0434383	18.756	13.404
ENSMUSG00000048186	Bend7	743.817	-0.0245356	0.231385	-0.106038	0.915552	0.955836	1.851	1.767
ENSMUSG00000026662	Sephs1	3371.28	-0.501357	0.15914	-3.15041	0.0016304	0.0104433	21.949	29.098
ENSMUSG00000026664	Phyh	1758.19	1.05791	0.388826	2.72078	0.00651288	0.0309976	20.955	9.482
ENSMUSG00000086670	Gm13194	6.97694	0.981641	0.86106	1.14004	0.254271	0.449916	5.576	2.692
ENSMUSG00000069188	Gm13192	68.5769	-0.824037	0.270173	-3.05003	0.0022882	0.0137184	51.297	85.023
ENSMUSG00000026668	Ucma	4.35529	0.633405	1.11725	0.566933	0.57076	0.737974	0.144	0.085
ENSMUSG00000026669	Mcm10	1197.22	0.383154	0.469022	0.816922	0.413973	0.609864	12.611	9.119
ENSMUSG00000026672	Optn	468.32	-0.00920016	0.324991	-0.028309	0.977416	0.987552	1.846	1.768
ENSMUSG00000026676	Ccdc3	159.477	-1.07298	0.385787	-2.78128	0.00541446	0.0269439	0.271	0.534
ENSMUSG00000039145	Camk1d	1311.53	0.231594	0.361322	0.640964	0.521546	0.698902	0.645	0.509
ENSMUSG00000039128	Cdc123	2202.37	0.0722307	0.17869	0.404223	0.686049	0.820401	9.078	8.088
ENSMUSG00000025817	Nudt5	976.165	0.273351	0.270431	1.0108	0.312112	0.512384	8.605	6.651
ENSMUSG00000056718	Gm13199	4.05447	0.071439	0.915296	0.0780502	0.937788	0.967482	1.131	1.001
ENSMUSG00000025816	Sec61a2	1080.13	-0.200803	0.169578	-1.18414	0.236358	0.429483	9.018	9.697
ENSMUSG00000025815	Dhtkd1	85.5034	0.0547493	0.342175	0.160004	0.872878	0.932463	0.399	0.365
ENSMUSG00000043241	Upf2	1748.04	-0.114754	0.123741	-0.927377	0.353731	0.554092	3.427	3.479
ENSMUSG00000045319	Proser2	456.972	-1.98718	0.396837	-5.00755	5.51262e-07	1.28642e-05	0.962	3.572
ENSMUSG00000102887	Gm10857	4.18378	-3.41204	1.12745	-3.02634	0.00247534	0.0145938	0.027	0.269
ENSMUSG00000039063	Echdc3	133.134	-0.118802	0.29835	-0.398197	0.690485	0.823429	1.115	1.126
ENSMUSG00000087125	A230108P19Rik	3.96534	-0.00173235	0.941602	-0.00183979	0.998532	0.999192	0.006	0.006
ENSMUSG00000118578	AL845275.1	7.50875	-0.357928	0.77707	-0.460612	0.645077	0.792425	1.611	1.972
ENSMUSG00000039046	Usp6nl	1796.58	-0.642595	0.187957	-3.41883	0.000628908	0.00479523	2.415	3.498
ENSMUSG00000086109	Gm13391	2.05447	1.65494	1.56969	1.05431	0.291741	0.491156	0.125	0.038
ENSMUSG00000002107	Celf2	2980.88	-0.209753	0.400623	-0.523567	0.60058	0.760524	0.605	0.643
ENSMUSG00000082953	Gm13217	53.5275	-0.624921	0.308494	-2.02571	0.0427943	0.129833	6.402	9.3
ENSMUSG00000079604	Gm13219	3.81436	1.53547	1.16961	1.31281	0.189248	0.37047	0.012	0.004
ENSMUSG00000015619	Gata3	13.4542	1.82948	1.10348	1.65792	0.0973329	0.234816	0.15	0.039
ENSMUSG00000025782	Taf3	669.179	-0.171032	0.13264	-1.28945	0.197242	0.38105	0.974	1.022
ENSMUSG00000103570	C630004M23Rik	7.82844	0.559177	0.699569	0.799316	0.424107	0.618813	1.233	0.786
ENSMUSG00000025781	Atp5c1	8298.62	0.113313	0.212607	0.532971	0.594054	0.756136	73.696	63.808
ENSMUSG00000037262	Kin	634.546	-0.019447	0.24304	-0.0800155	0.936225	0.967172	10.958	10.518
ENSMUSG00000037254	Itih2	223.107	-0.427848	0.502718	-0.85107	0.394731	0.591761	1.128	1.42
ENSMUSG00000025780	Itih5	724.747	-0.425267	0.247308	-1.71958	0.0855081	0.215182	1.342	1.681
ENSMUSG00000061186	Sfmbt2	63.5804	-1.43668	0.448632	-3.20235	0.0013631	0.00904848	0.042	0.109
ENSMUSG00000083900	Gm13294	2.99515	0.293408	1.04731	0.280155	0.779359	0.881407	0.519	0.396
ENSMUSG00000026778	Prkcq	57.934	-0.205485	0.754918	-0.272194	0.785473	0.884611	0.092	0.099
ENSMUSG00000102674	8030442B05Rik	2.16834	1.12015	1.55826	0.718845	0.472236	0.659388	0.01	0.004
ENSMUSG00000086006	Gm13293	3.98606	5.52482	1.75345	3.15083	0.00162809	0.0104317	0.388	0
ENSMUSG00000082424	Gm13292	3.57025	-0.613349	1.09739	-0.558916	0.576219	0.741813	0.417	0.605
ENSMUSG00000026773	Pfkfb3	329.818	0.460973	0.335156	1.3754	0.169007	0.342387	0.954	0.65
ENSMUSG00000037197	Rbm17	2540.6	0.531598	0.291785	1.82188	0.0684726	0.183561	34.685	22.629
ENSMUSG00000026770	Il2ra	4.46699	1.72017	1.05593	1.62906	0.1033	0.244809	0.022	0.006
ENSMUSG00000023206	Il15ra	14.4278	1.79719	0.617253	2.91159	0.00359594	0.0197446	0.184	0.049
ENSMUSG00000058594	Fbh1	2147.06	0.084887	0.181404	0.467943	0.639825	0.788854	13.498	11.898
ENSMUSG00000047909	Ankrd16	222.449	0.492424	0.284193	1.73271	0.0831474	0.211326	4.965	3.32
ENSMUSG00000026768	Itga8	98.2177	-0.842405	0.405272	-2.07862	0.0376527	0.118406	0.077	0.126
ENSMUSG00000086843	E030013I19Rik	2.01468	0.690561	1.33232	0.518314	0.604239	0.763005	0.049	0.028
ENSMUSG00000026767	Mindy3	787.884	0.0692116	0.167491	0.413226	0.679441	0.81623	2.282	2.029
ENSMUSG00000026730	Pter	253.06	0.96724	0.458344	2.11029	0.034833	0.11183	0.896	0.424
ENSMUSG00000049630	C1ql3	592.681	2.66837	0.509135	5.24098	1.59724e-07	4.32233e-06	28.102	4.032
ENSMUSG00000104459	Gm37824	14.5317	0.74949	0.597151	1.25511	0.209439	0.396764	0.98	0.544
ENSMUSG00000102900	Gm37811	61.7799	2.40628	0.741028	3.24722	0.00116537	0.00796808	9.483	1.645
ENSMUSG00000103599	Gm37356	10.8286	2.39477	0.794867	3.01279	0.00258856	0.0151266	2.522	0.442
ENSMUSG00000026727	Rsu1	470.476	-0.171717	0.192909	-0.890143	0.373389	0.573281	0.484	0.509
ENSMUSG00000086358	Gm13270	49.4759	-0.820014	0.364952	-2.24691	0.0246456	0.08616	0.146	0.242
ENSMUSG00000026726	Cubn	54.1378	-1.80671	0.723066	-2.49869	0.0124655	0.0511882	0.017	0.055
ENSMUSG00000026723	Trdmt1	346.052	-0.329949	0.159375	-2.07027	0.0384273	0.120147	1.784	2.103
ENSMUSG00000026728	Vim	3682.12	0.21056	0.318949	0.660168	0.509146	0.689519	76.154	60.62
ENSMUSG00000003418	St8sia6	15.0467	1.73729	0.603129	2.88046	0.0039709	0.0212688	0.034	0.01
ENSMUSG00000063275	Hacd1	734.951	-0.37609	0.234681	-1.60256	0.109032	0.254295	0.63	0.76
ENSMUSG00000086657	Stamos	68.1674	0.386918	0.318064	1.21648	0.223802	0.414641	4.818	3.455
ENSMUSG00000026718	Stam	3670.9	0.0926789	0.12341	0.750983	0.452663	0.643119	10.402	9.16
ENSMUSG00000103901	Gm37499	109.861	-0.259777	0.218997	-1.18621	0.235538	0.428542	5.847	6.552
ENSMUSG00000061531	Tmem236	14.8419	0.833764	0.618935	1.34709	0.17795	0.354845	0.087	0.046
ENSMUSG00000026712	Mrc1	300.652	-1.75306	0.25403	-6.901	5.16374e-12	4.35914e-10	0.246	0.777
ENSMUSG00000036949	Slc39a12	229.216	0.617326	0.634288	0.973258	0.330425	0.531212	0.598	0.352
ENSMUSG00000084901	Gm13266	1.22799	1.18575	2.05762	0.576272	0.564431	NA	0.011	0.005
ENSMUSG00000057914	Cacnb2	818.479	-0.253023	0.372817	-0.678678	0.497342	0.679707	0.372	0.408
ENSMUSG00000070271	Gm13268	2.64817	0.796835	1.23092	0.647349	0.517406	0.696229	1.442	0.788
ENSMUSG00000026707	Nsun6	328.668	0.0768308	0.22144	0.346959	0.728622	0.847529	1.214	1.086
ENSMUSG00000017418	Arl5b	1905.99	-0.0404647	0.235517	-0.171812	0.863585	0.927766	12.572	12.128
ENSMUSG00000075520	Malrd1	7.94668	-0.07759	0.719074	-0.107903	0.914073	0.955044	0.003	0.003
ENSMUSG00000103865	Gm37416	26.6299	0.192027	0.619828	0.309808	0.756707	0.866227	16.622	13.746
ENSMUSG00000026748	Plxdc2	315.364	0.642423	0.450538	1.4259	0.153897	0.321869	0.229	0.133
ENSMUSG00000053702	Nebl	349.768	1.79547	0.540404	3.32246	0.00089226	0.00640017	0.308	0.081
ENSMUSG00000062651	H2al2a	1.55333	-1.56316	1.96185	-0.796781	0.425578	NA	0.129	0.377
ENSMUSG00000081116	Gm13329	1.50946	2.88408	2.59398	1.11183	0.26621	NA	1.053	0
ENSMUSG00000054057	A930004D18Rik	363.97	0.189961	0.278509	0.682066	0.495197	0.677782	5.168	4.295
ENSMUSG00000085319	Gm13330	2.87875	0.349384	1.10333	0.316662	0.7515	0.863205	0.098	0.073
ENSMUSG00000054074	Skida1	481.274	0.0353134	0.199605	0.176917	0.859574	0.925248	11.088	10.16
ENSMUSG00000086340	1810059C17Rik	15.1721	0.718006	0.575928	1.2467	0.212509	0.400753	1.664	0.956
ENSMUSG00000026743	Mllt10	3059.98	0.0173967	0.129164	0.134687	0.89286	0.943675	4.1	3.791
ENSMUSG00000026740	Dnajc1	1351.06	0.0956117	0.160162	0.596967	0.550529	0.72172	1.385	1.215
ENSMUSG00000051154	Commd3	1276.96	0.291595	0.22432	1.29991	0.193632	0.376236	71.611	54.764
ENSMUSG00000026739	Bmi1	6357.51	0.210138	0.176809	1.18851	0.234634	0.427597	143.793	116.15
ENSMUSG00000037708	Spag6	86.826	1.24527	0.36147	3.44501	0.000571041	0.00442891	0.437	0.173
ENSMUSG00000092353	Gm20539	8.85631	0.523649	0.661869	0.791166	0.428847	0.623197	0.115	0.074
ENSMUSG00000097638	Carlr	5.53758	4.18533	1.53199	2.73195	0.00629611	0.0302307	0.536	0.028
ENSMUSG00000026737	Pip4k2a	462.064	0.500331	0.308504	1.6218	0.104847	0.247312	0.687	0.453
ENSMUSG00000026736	4930426L09Rik	7.90836	0.704617	0.745616	0.945013	0.344652	0.544865	1.659	0.95
ENSMUSG00000037683	Armc3	46.9945	-0.851302	0.727906	-1.16952	0.242193	0.436134	0.073	0.122
ENSMUSG00000087674	4930447M23Rik	5.06238	5.35933	1.9462	2.75374	0.0058919	0.0287591	0.47	0.01
ENSMUSG00000023094	Msrb2	151.715	1.16216	0.260056	4.46886	7.86384e-06	0.000124888	1.741	0.724
ENSMUSG00000109733	Gm33940	2.19278	2.59822	1.41538	1.83571	0.0664012	0.179566	0.346	0.052
ENSMUSG00000026735	Ptf1a	1.18471	-3.02139	2.04473	-1.47765	0.139502	NA	0.037	0.312
ENSMUSG00000056329	1810010K12Rik	6.92746	-3.06316	0.92586	-3.30845	0.000938126	0.00665259	0.131	1.045
ENSMUSG00000043415	Otud1	235.301	-0.377013	0.304284	-1.23902	0.21534	0.404532	16.018	19.338
ENSMUSG00000036617	Etl4	276.958	1.11776	0.593916	1.88202	0.0598334	0.166161	0.094	0.04
ENSMUSG00000081128	Gm13328	7.04074	1.01912	0.866364	1.17631	0.23947	0.432982	1.834	0.844
ENSMUSG00000036591	Arhgap21	2562.7	-1.00664	0.409096	-2.46066	0.0138683	0.0554967	3.521	6.408
ENSMUSG00000075514	Gm13375	99.5614	-0.405168	0.3569	-1.13524	0.256274	0.451951	21.955	27.098
ENSMUSG00000086821	Gm13377	5.21661	-1.16072	1.50695	-0.770242	0.441157	0.633482	0.008	0.018
ENSMUSG00000026679	Enkur	63.1347	-1.02171	0.715884	-1.42721	0.15352	0.32131	0.398	0.754
ENSMUSG00000048550	Thnsl1	796.261	0.489778	0.22515	2.17534	0.0296048	0.0991144	19.902	13.316
ENSMUSG00000084071	Gm13378	1.42952	-0.564934	2.08007	-0.271594	0.785934	NA	0.41	0.568
ENSMUSG00000085680	Gm13327	1.83682	4.71871	2.01065	2.34686	0.0189324	NA	0.038	0
ENSMUSG00000045967	Gpr158	262.081	3.88906	0.774245	5.02304	5.08605e-07	1.19743e-05	0.287	0.018
ENSMUSG00000025716	Myo3a	1.75911	1.51778	1.64053	0.925174	0.354875	NA	0.002	0.001
ENSMUSG00000083863	Gm13341	2.48729	-0.551617	1.387	-0.397706	0.690847	0.823814	0.722	0.969
ENSMUSG00000083563	Gm13340	57.8494	0.234017	0.364381	0.642233	0.520722	0.698502	7.519	5.99
ENSMUSG00000082884	Gm13339	2.14191	0.923637	1.48167	0.623375	0.533038	0.707991	0.817	0.411
ENSMUSG00000026787	Gad2	150.03	6.94536	1.59751	4.34762	1.37621e-05	0.000196499	1.254	0.01
ENSMUSG00000026786	Apbb1ip	28.9429	0.447145	0.558567	0.800522	0.423408	0.618219	0.064	0.044
ENSMUSG00000069136	A130006I12Rik	6.05181	1.09864	1.05256	1.04379	0.296584	0.497014	3.478	1.485
ENSMUSG00000026784	Pdss1	350.864	0.156497	0.242582	0.645131	0.518842	0.697106	1.806	1.522
ENSMUSG00000058835	Abi1	2339.81	0.265405	0.139575	1.90152	0.0572338	0.160618	5.172	4.033
ENSMUSG00000026781	Acbd5	2012.28	0.369305	0.114389	3.2285	0.00124443	0.0084082	9.524	6.913
ENSMUSG00000026779	Mastl	1137.77	-0.0817409	0.378866	-0.215751	0.829182	0.907969	6.188	6.183
ENSMUSG00000026775	Yme1l1	6729.55	0.14664	0.146063	1.00395	0.315403	0.51575	32.528	27.539
ENSMUSG00000081648	Gm13423	15.7307	0.210034	0.689333	0.304692	0.760601	0.868882	1.584	1.286
ENSMUSG00000026774	Potegl	27.6302	1.15072	0.46669	2.4657	0.0136747	0.0549296	0.106	0.044
ENSMUSG00000069132	Nxph2	4.93875	3.67622	1.39904	2.62767	0.00859715	0.0383828	0.034	0.002
ENSMUSG00000026771	Spopl	1262.73	0.0908913	0.130879	0.694468	0.487388	0.671284	4.156	3.647
ENSMUSG00000081519	Gm13331	63.6463	-1.95188	0.801477	-2.43536	0.0148771	0.0585805	13.282	48.443
ENSMUSG00000026986	Hnmt	74.1106	0.686482	0.531042	1.29271	0.196112	0.379495	0.31	0.177
ENSMUSG00000083116	Gm13410	43.6718	-0.493366	0.445112	-1.10841	0.267686	0.464461	5.269	7.107
ENSMUSG00000026981	Il1rn	23.8679	2.1909	0.885451	2.47433	0.0133485	0.0539037	0.414	0.086
ENSMUSG00000026979	Psd4	41.1551	1.37159	0.440237	3.11558	0.00183584	0.0115313	0.24	0.087
ENSMUSG00000084241	Gm13416	9.68031	0.0897596	0.610266	0.147083	0.883067	0.938333	1.328	1.168
ENSMUSG00000004113	Cacna1b	463.987	0.983732	0.459681	2.14003	0.0323521	0.105871	0.99	0.464
ENSMUSG00000036893	Ehmt1	2873.28	0.028193	0.1445	0.195107	0.845309	0.917162	4.793	4.411
ENSMUSG00000026972	Arrdc1	127.94	0.450706	0.398049	1.13229	0.257513	0.453392	3.68	2.551
ENSMUSG00000026974	Zmynd19	800.552	0.105259	0.239829	0.43889	0.660741	0.8031	14.888	12.994
ENSMUSG00000026975	Dph7	481.632	0.266788	0.13931	1.91506	0.0554848	0.156906	11.038	8.596
ENSMUSG00000036850	Mrpl41	950.201	0.184078	0.16424	1.12079	0.262379	0.458596	219.176	180.751
ENSMUSG00000036833	Pnpla7	963.064	-0.0391793	0.281393	-0.139233	0.889266	0.941897	2.449	2.352
ENSMUSG00000006476	Nsmf	1069.02	1.00783	0.357894	2.816	0.00486263	0.0249659	42.948	19.805
ENSMUSG00000118563	AL732309.1	4.54116	1.3622	1.03565	1.31531	0.188406	0.369222	0.027	0.01
ENSMUSG00000087028	Gm13387	10.8224	0.652113	0.720148	0.905526	0.365187	0.565392	0.131	0.078
ENSMUSG00000078202	Nrarp	399.562	0.316547	0.259028	1.22206	0.221686	0.412153	40.158	29.943
ENSMUSG00000103217	Gm38287	4.05919	-0.91793	1.39047	-0.66016	0.509151	0.689519	0.244	0.427
ENSMUSG00000059555	Tor4a	71.9251	0.28043	0.246383	1.13819	0.255042	0.450697	3.831	2.948
ENSMUSG00000013465	Nelfb	1556.27	-0.0224945	0.156538	-0.1437	0.885737	0.939851	27.592	26.359
ENSMUSG00000036770	Stpg3	2.95823	-1.49804	1.30065	-1.15176	0.24942	0.444563	0.171	0.46
ENSMUSG00000026969	Fam166a	4.15493	2.06408	0.984636	2.09628	0.036057	0.114786	0.487	0.108
ENSMUSG00000036752	Tubb4b	12510.7	-0.356735	0.316685	-1.12647	0.259968	0.456111	900.655	1079.23
ENSMUSG00000036731	Cysrt1	11.7928	-0.250561	0.519085	-0.482698	0.62931	0.781286	0.666	0.739
ENSMUSG00000044628	Rnf208	416.577	-0.0686478	0.228451	-0.300493	0.763801	0.871176	59.931	58.636
ENSMUSG00000006471	Ndor1	1.31422	1.08489	1.68522	0.643771	0.519724	NA	0.037	0.017
ENSMUSG00000078201	Tmem203	188.47	0.742227	0.320857	2.31326	0.0207081	0.0757048	57.479	32.229
ENSMUSG00000048707	Tprn	586.047	-0.464292	0.332202	-1.39762	0.162227	0.332859	16.431	21.394
ENSMUSG00000026966	Ssna1	949.706	0.0827993	0.174918	0.473361	0.635955	0.785546	150.801	133.407
ENSMUSG00000026965	Anapc2	1223.42	0.223017	0.171253	1.30227	0.192826	0.375131	19.249	15.465
ENSMUSG00000026959	Grin1	402.677	3.17937	0.546638	5.81623	6.01887e-09	2.47639e-07	5.745	0.582
ENSMUSG00000036646	Man1b1	2072.1	0.296289	0.229824	1.2892	0.197329	0.38115	24.398	18.652
ENSMUSG00000026958	Dpp7	222.985	0.718662	0.223528	3.21509	0.00130402	0.00873565	10.875	6.152
ENSMUSG00000026956	Uap1l1	195.222	0.914851	0.238109	3.84216	0.000121958	0.00124478	9.767	4.844
ENSMUSG00000026955	Sapcd2	999.002	-0.117616	0.448492	-0.262248	0.79313	0.888187	39.216	39.747
ENSMUSG00000015085	Entpd2	34.1648	-1.15759	0.588311	-1.96765	0.0491088	0.143911	0.763	1.569
ENSMUSG00000015094	Npdc1	1026.43	0.844394	0.194754	4.33569	1.45301e-05	0.000205664	26.041	13.559
ENSMUSG00000036587	Fut7	1.56761	1.2675	1.5952	0.79457	0.426863	NA	0.111	0.044
ENSMUSG00000026944	Abca2	1777.99	0.333935	0.201654	1.65598	0.0977264	0.235443	19.981	14.706
ENSMUSG00000047617	Paxx	952.842	-0.499884	0.198696	-2.51582	0.0118754	0.0493293	23.879	31.691
ENSMUSG00000015093	Clic3	11.6156	0.0508251	0.734565	0.0691908	0.944838	0.971381	1.145	1.02
ENSMUSG00000015090	Ptgds	2225.61	-0.825924	0.771101	-1.0711	0.284126	0.482438	43.373	67.941
ENSMUSG00000015083	C8g	32.8132	0.619655	0.427531	1.44938	0.147232	0.312345	2.849	1.745
ENSMUSG00000015095	Fbxw5	1031.05	0.359443	0.242701	1.48101	0.138603	0.299527	52.409	38.347
ENSMUSG00000026942	Traf2	678.092	0.189686	0.124358	1.52532	0.12718	0.282535	5.266	4.329
ENSMUSG00000015092	Edf1	1940.13	0.0439149	0.189756	0.231428	0.816982	0.900926	91.987	83.303
ENSMUSG00000026941	Mamdc4	42.8989	-0.233144	0.313991	-0.742518	0.457774	0.647471	0.784	0.863
ENSMUSG00000036504	Phpt1	9.96374	-0.0469207	0.631985	-0.0742433	0.940817	0.969486	1.001	0.97
ENSMUSG00000029419	Ajm1	102.831	2.70563	0.559008	4.84005	1.29804e-06	2.67812e-05	5.48	0.769
ENSMUSG00000015087	Rabl6	1613.43	0.671193	0.235899	2.84526	0.00443757	0.023211	15.863	9.323
ENSMUSG00000052403	Fcnaos	39.9317	0.832098	0.490171	1.69757	0.0895895	0.222077	0.316	0.167
ENSMUSG00000026939	Tmem141	194.337	0.284371	0.290435	0.979121	0.32752	0.528826	18.04	13.761
ENSMUSG00000026938	Fcna	8.60086	-2.25349	0.856529	-2.63096	0.00851439	0.0380747	0.164	0.728
ENSMUSG00000087612	A230005M16Rik	6.34873	0.17172	0.813591	0.211065	0.832837	0.910154	0.323	0.272
ENSMUSG00000049086	Bmyc	190.292	0.217678	0.304676	0.714455	0.474946	0.662002	42.411	34.459
ENSMUSG00000036401	Glt6d1	2.9984	1.03953	1.138	0.913471	0.360995	0.561238	0.051	0.023
ENSMUSG00000058740	Kcnt1	99.0113	2.67864	0.671443	3.98938	6.62467e-05	0.000746311	0.887	0.128
ENSMUSG00000026933	Camsap1	4979.61	0.161702	0.135392	1.19433	0.232349	0.425275	18.522	15.551
ENSMUSG00000082357	Gm13542	1.48218	0.469261	1.74363	0.269128	0.787831	NA	0.435	0.291
ENSMUSG00000036352	Ubac1	1266.09	0.111998	0.174103	0.643284	0.52004	0.69795	11.921	10.329
ENSMUSG00000026932	Nacc2	585.03	1.06569	0.345034	3.08865	0.00201067	0.0123633	2.181	0.962
ENSMUSG00000087679	Tmem250-ps	520.313	0.54209	0.17885	3.03097	0.00243768	0.0144239	33.779	21.594
ENSMUSG00000087595	1810012K08Rik	2.31355	4.12496	2.46129	1.67593	0.0937518	0.228939	1.257	0.06
ENSMUSG00000085545	Gm13553	7.42066	-2.32884	1.10229	-2.11273	0.0346243	0.111295	0.07	0.33
ENSMUSG00000026934	Lhx3	3647.67	-2.43294	0.619133	-3.92959	8.50917e-05	0.00092462	31.368	156.173
ENSMUSG00000098977	Gm27196	76.5594	-1.17587	0.425157	-2.76572	0.00567964	0.0279874	3.98	8.389
ENSMUSG00000036327	Qsox2	2945.76	0.280067	0.262997	1.0649	0.28692	0.485927	21.963	16.855
ENSMUSG00000048038	Ccdc187	453.55	-0.554842	0.57059	-0.972399	0.330852	0.531495	1.184	1.604
ENSMUSG00000026930	Gpsm1	4179.23	-0.160311	0.276139	-0.580544	0.561548	0.730247	26.203	27.634
ENSMUSG00000075467	Dnlz	585.731	0.350333	0.248889	1.40759	0.159253	0.328923	34.127	25.195
ENSMUSG00000026928	Card9	59.4464	0.579627	0.407738	1.42157	0.155152	0.323511	1.475	0.925
ENSMUSG00000086779	Gm13562	36.8299	-0.526433	0.389199	-1.35261	0.176182	0.35218	0.329	0.442
ENSMUSG00000036281	Snapc4	638.758	0.27293	0.207749	1.31375	0.188931	0.369987	8.6	6.683
ENSMUSG00000085767	Gm13563	122.074	0.216752	0.326551	0.663761	0.506844	0.687857	4.025	3.244
ENSMUSG00000026927	Entr1	852.077	0.413562	0.176512	2.34297	0.019131	0.0711669	31.2	22.039
ENSMUSG00000026926	Pmpca	2815.8	0.213603	0.278478	0.767036	0.44306	0.635048	79.494	64.419
ENSMUSG00000026925	Inpp5e	593.003	0.151441	0.172116	0.879876	0.378927	0.578552	9.978	8.455
ENSMUSG00000026924	Sec16a	3550.62	-0.0199596	0.152089	-0.131236	0.895588	0.945	20.707	19.688
ENSMUSG00000086714	0610009E02Rik	86.721	-0.0491191	0.314285	-0.156288	0.875806	0.934131	1.367	1.338
ENSMUSG00000026923	Notch1	627.616	0.411737	0.280832	1.46613	0.142613	0.305481	2.71	1.885
ENSMUSG00000026921	Egfl7	22.8742	0.462476	0.39545	1.16949	0.242205	0.436134	0.485	0.329
ENSMUSG00000092356	Gm20532	12.3206	0.321124	0.610708	0.525822	0.599012	0.759291	0.064	0.048
ENSMUSG00000026922	Agpat2	111.174	-0.0834575	0.4329	-0.192787	0.847126	0.918193	1.973	1.944
ENSMUSG00000036186	Dipk1b	87.5796	2.00293	0.506315	3.95591	7.62446e-05	0.000846279	3.753	0.86
ENSMUSG00000097052	Snora43	1.16016	0.0128608	1.79394	0.00716903	0.99428	NA	2.482	2.278
ENSMUSG00000077192	Snora17	448.434	-1.06876	0.501307	-2.13195	0.0330107	0.107296	556.603	1088.68
ENSMUSG00000086775	Snhg7os	1.42962	-0.484948	1.75236	-0.276739	0.78198	NA	0.037	0.048
ENSMUSG00000015787	Abo	1.37028	0.920989	2.33369	0.39465	0.693101	NA	0.019	0.009
ENSMUSG00000036160	Surf6	1537.34	0.134163	0.191729	0.699753	0.484081	0.668613	21.471	18.364
ENSMUSG00000015776	Med22	1565.17	0.0490014	0.201839	0.242774	0.80818	0.895665	61.458	55.918
ENSMUSG00000062647	Rpl7a	5008.42	0.110609	0.360583	0.306752	0.759032	0.86767	433.375	376.038
ENSMUSG00000015790	Surf1	912.199	0.0596133	0.180863	0.329605	0.741698	0.856916	53.743	48.086
ENSMUSG00000014873	Surf2	401.489	0.271647	0.233441	1.16366	0.24456	0.438929	24.142	18.663
ENSMUSG00000014867	Surf4	4394.69	0.212811	0.253119	0.840753	0.400487	0.597473	68.656	55.685
ENSMUSG00000049897	Stkld1	15.3527	-0.343974	0.533537	-0.644705	0.519118	0.697324	0.125	0.149
ENSMUSG00000052406	Rexo4	1131.75	0.451793	0.127395	3.54639	0.00039055	0.00323256	22.834	15.674
ENSMUSG00000014852	Adamts13	6.22349	1.89014	0.906377	2.08538	0.0370349	0.117107	0.063	0.016
ENSMUSG00000015488	Cacfd1	484.666	0.402875	0.27878	1.44513	0.14842	0.314142	10.654	7.418
ENSMUSG00000036067	Slc2a6	31.9043	3.13939	0.75576	4.15396	3.26776e-05	0.00040995	2.11	0.221
ENSMUSG00000087364	Gm13398	1.44618	-0.747907	1.92102	-0.389327	0.697034	NA	0.059	0.094
ENSMUSG00000036040	Adamtsl2	36.2109	-0.0991378	0.462746	-0.214238	0.830361	0.90862	0.275	0.27
ENSMUSG00000009216	Fam163b	27.376	3.77935	1.04485	3.61713	0.000297889	0.00257107	0.471	0.031
ENSMUSG00000000889	Dbh	1.99968	3.18591	2.29558	1.38785	0.165184	NA	0.066	0.007
ENSMUSG00000009614	Sardh	131.724	-0.166736	0.31068	-0.536682	0.591488	0.753594	0.407	0.423
ENSMUSG00000009621	Vav2	280.466	0.0919049	0.194978	0.47136	0.637383	0.786658	0.39	0.342
ENSMUSG00000109946	Brd3os	305.183	0.0617717	0.206718	0.298821	0.765076	0.87163	33.591	29.99
ENSMUSG00000026918	Brd3	2664.11	-0.13727	0.207371	-0.661953	0.508001	0.688678	9.11	9.404
ENSMUSG00000026917	Wdr5	1369.51	0.25881	0.226178	1.14427	0.25251	0.447623	15.453	12.118
ENSMUSG00000080538	Gm25541	31.7705	0.225534	0.393349	0.573368	0.566396	0.734477	60.792	48.583
ENSMUSG00000085929	Gm13421	105.254	0.720811	0.379977	1.89698	0.0578302	0.161912	9.827	5.661
ENSMUSG00000015846	Rxra	1204.31	-0.348745	0.27682	-1.25983	0.207731	0.394693	2.716	3.213
ENSMUSG00000085766	2810430I11Rik	3.147	1.74307	1.17914	1.47825	0.139342	0.300541	0.284	0.08
ENSMUSG00000026837	Col5a1	567.865	-1.25255	0.613313	-2.04227	0.0411251	0.125923	0.443	0.98
ENSMUSG00000086425	F730016J06Rik	21.6423	1.35751	0.515596	2.63289	0.00846613	0.0379017	0.278	0.1
ENSMUSG00000026833	Olfm1	16812.2	-0.269721	0.256281	-1.05244	0.292596	0.492165	84.198	94.799
ENSMUSG00000087196	Gm13373	17.997	1.50117	0.89819	1.67133	0.0946561	0.230325	0.593	0.205
ENSMUSG00000035829	Ppp1r26	1803.72	0.0600142	0.154103	0.389443	0.696948	0.828154	45.655	41.116
ENSMUSG00000026831	1700007K13Rik	56.8287	-1.112	0.445127	-2.49816	0.0124838	0.0512436	1.783	3.558
ENSMUSG00000035772	Mrps2	786.209	0.658544	0.288662	2.28137	0.0225268	0.0804382	62.898	37.242
ENSMUSG00000082895	Rpsa-ps9	61.7788	-0.277838	0.3238	-0.858053	0.390863	0.588545	14.008	16.013
ENSMUSG00000026829	Gbgt1	30.467	0.529946	0.409858	1.293	0.196011	0.379434	0.746	0.483
ENSMUSG00000063611	Gm10134	31.3176	-0.0274356	0.45261	-0.0606165	0.951665	0.975381	2.925	2.789
ENSMUSG00000026821	Ralgds	6147.52	-0.700261	0.312172	-2.24319	0.0248847	0.08683	26.743	40.501
ENSMUSG00000087667	Gm13381	1.66731	-0.715648	1.85592	-0.385603	0.69979	NA	0.019	0.03
ENSMUSG00000026816	Gtf3c5	959.042	-0.0807494	0.197929	-0.407972	0.683294	0.818262	11.17	11.059
ENSMUSG00000026815	Gfi1b	1.46333	-3.96818	2.13879	-1.85533	0.0635484	NA	0	0.045
ENSMUSG00000026812	Tsc1	1840.35	-0.0425764	0.134184	-0.3173	0.751016	0.862789	7.774	7.547
ENSMUSG00000026809	Spaca9	30.033	0.814612	0.637137	1.27855	0.201056	0.38592	1.128	0.605
ENSMUSG00000026807	Ak8	71.1604	-1.07072	0.474708	-2.25552	0.0241005	0.0846593	0.073	0.143
ENSMUSG00000035666	Gtf3c4	3615.11	-0.00641173	0.125378	-0.051139	0.959215	0.979225	40.504	38.077
ENSMUSG00000026806	Ddx31	478.857	0.249744	0.167335	1.49248	0.135574	0.294907	1.597	1.252
ENSMUSG00000026805	Barhl1	6.28814	-0.0546845	1.15474	-0.0473565	0.962229	0.980225	0.138	0.135
ENSMUSG00000079502	Cfap77	39.7417	-0.670294	0.57363	-1.16851	0.2426	0.436445	0.045	0.066
ENSMUSG00000026803	Ttf1	761.346	0.282887	0.138651	2.04029	0.0413216	0.126311	6.626	5.09
ENSMUSG00000043535	Setx	7465.1	-0.132159	0.160165	-0.825142	0.409291	0.605508	26.152	26.891
ENSMUSG00000035513	Ntng2	1525.49	-0.299765	0.243729	-1.22991	0.218731	0.408595	6.077	7.055
ENSMUSG00000026799	Med27	1244.48	-0.136414	0.170965	-0.797908	0.424924	0.619663	1.456	1.509
ENSMUSG00000086994	Gm13402	2.4001	0.151806	1.13101	0.134222	0.893227	0.943734	0.015	0.012
ENSMUSG00000039844	Rapgef1	2602.44	0.238817	0.213066	1.12086	0.262349	0.458582	5.03	4.009
ENSMUSG00000079497	Gm13420	1.32181	3.65212	1.87529	1.94749	0.0514758	NA	0.072	0
ENSMUSG00000039826	Trub2	1063.27	0.288182	0.189174	1.52337	0.127667	0.283289	9.129	7.02
ENSMUSG00000026798	Coq4	361.706	0.347938	0.256364	1.3572	0.174717	0.349913	8.019	5.85
ENSMUSG00000059316	Slc27a4	1472.84	0.364705	0.169725	2.1488	0.0316503	0.104429	22.942	16.599
ENSMUSG00000069020	Urm1	666.591	0.421546	0.211115	1.99676	0.0458509	0.13672	6.501	4.57
ENSMUSG00000039798	2600006K01Rik	3.68551	1.77663	1.1582	1.53396	0.125039	0.278947	0.741	0.203
ENSMUSG00000039787	Cercam	115.313	-0.142695	0.380002	-0.375511	0.707281	0.834116	1.821	1.864
ENSMUSG00000026790	Odf2	1638.19	0.252983	0.399059	0.633947	0.526115	0.702795	9.613	7.51
ENSMUSG00000019715	Gle1	1593.31	0.0742346	0.192921	0.384793	0.700391	0.830289	14.279	12.697
ENSMUSG00000057738	Sptan1	28486.7	0.0827778	0.16452	0.503148	0.61486	0.770632	83.039	73.406
ENSMUSG00000039715	Wdr34	1115.28	-0.200058	0.174272	-1.14797	0.250983	0.446286	13.117	14.101
ENSMUSG00000054766	Set	10056.2	0.175963	0.201135	0.874853	0.381654	0.581245	144.706	119.861
ENSMUSG00000026785	Pkn3	38.7192	0.339373	0.571351	0.593983	0.552523	0.723301	0.742	0.553
ENSMUSG00000015335	Zdhhc12	309.057	1.55461	0.410767	3.78466	0.00015392	0.00150841	32.88	10.399
ENSMUSG00000039686	Zer1	1647.19	0.384194	0.173578	2.21338	0.0268713	0.0918643	14.027	10.097
ENSMUSG00000039678	Tbc1d13	1708.01	-0.32056	0.114714	-2.79444	0.00519901	0.0262103	16.545	19.302
ENSMUSG00000085401	Slc39a1-ps	13.5343	-0.0108826	0.504822	-0.0215573	0.982801	0.990703	2.929	2.771
ENSMUSG00000015337	Endog	251.594	0.297154	0.261784	1.13511	0.256328	0.451995	20.222	15.325
ENSMUSG00000039660	Spout1	861.743	0.156403	0.173701	0.900416	0.367899	0.56793	37.592	31.456
ENSMUSG00000039648	Kyat1	378.727	-0.074901	0.253066	-0.295974	0.76725	0.873166	3.63	3.612
ENSMUSG00000100747	1700084E18Rik	17.3321	0.33737	0.458061	0.736516	0.461417	0.650626	3.149	2.34
ENSMUSG00000007476	Lrrc8a	35.9301	0.302038	0.371034	0.814046	0.415619	0.611481	0.322	0.245
ENSMUSG00000099041	Gm28035	4.77846	-0.515504	0.909711	-0.566668	0.57094	0.738066	0.02	0.026
ENSMUSG00000098794	Gm28038	3.62275	0.311266	1.01018	0.308129	0.757984	0.867066	0.045	0.034
ENSMUSG00000075419	Dolk	664.99	0.438269	0.193923	2.26001	0.0238207	0.083927	73.256	50.748
ENSMUSG00000052533	Nup188	2835.1	-0.134	0.220965	-0.606432	0.544228	0.716964	9.852	10.121
ENSMUSG00000084892	Gm14471	5.62161	0.845674	1.00601	0.840622	0.40056	0.597498	0.081	0.041
ENSMUSG00000026860	Sh3glb2	1278.02	0.23261	0.189036	1.23051	0.218507	0.408249	16.97	13.509
ENSMUSG00000026858	Miga2	758.331	0.469623	0.124865	3.76105	0.000169204	0.0016179	8.942	6.052
ENSMUSG00000026856	Dolpp1	466.367	0.573959	0.253218	2.26666	0.0234111	0.0828143	12.391	7.888
ENSMUSG00000026853	Crat	481.53	0.871757	0.317374	2.74678	0.00601832	0.029208	7.214	3.716
ENSMUSG00000087435	Gm16323	1.19909	3.82908	2.06171	1.85723	0.0632783	NA	0.341	0
ENSMUSG00000039515	Ptpa	3170.03	0.137247	0.237123	0.578801	0.562723	0.731237	19.776	16.93
ENSMUSG00000089762	Ier5l	270.111	0.074361	0.334524	0.222289	0.824089	0.905123	26.13	23.022
ENSMUSG00000047363	Cstad	63.9867	2.26397	0.429841	5.26701	1.38667e-07	3.80598e-06	1.733	0.338
ENSMUSG00000086405	9330198N18Rik	76.7154	0.648238	0.314965	2.05813	0.0395779	0.122479	0.365	0.217
ENSMUSG00000087268	Gm14486	25.6494	0.931625	0.533011	1.74785	0.0804893	0.20645	0.383	0.189
ENSMUSG00000075416	Gm14488	34.9368	1.69805	0.491315	3.45613	0.00054799	0.00426578	1.591	0.459
ENSMUSG00000044320	1700001O22Rik	9.50252	2.60043	0.995789	2.61142	0.00901668	0.0398644	0.459	0.069
ENSMUSG00000026857	Ntmt1	658.11	0.216138	0.24491	0.882522	0.377495	0.577171	9.944	8.063
ENSMUSG00000039483	Asb6	436.353	0.68807	0.200893	3.42505	0.000614685	0.0047054	15.41	8.949
ENSMUSG00000039476	Prrx2	48.5812	-0.919887	0.381356	-2.41215	0.0158588	0.0614768	0.138	0.244
ENSMUSG00000050737	Ptges	574.304	0.557022	0.469588	1.18619	0.235547	0.428542	2.997	1.928
ENSMUSG00000026848	Tor1b	726.342	0.464717	0.20731	2.24165	0.0249839	0.0870839	31.807	21.751
ENSMUSG00000026849	Tor1a	709.814	0.166423	0.187889	0.88575	0.375752	0.575401	22.011	18.308
ENSMUSG00000026851	BC005624	1503.19	-0.0481503	0.141932	-0.33925	0.734421	0.85148	27.711	26.878
ENSMUSG00000026854	Usp20	1226	-0.315266	0.175257	-1.79887	0.0720385	0.190327	4.995	5.83
ENSMUSG00000075415	Fnbp1	505.032	0.470972	0.201972	2.33187	0.0197075	0.072845	1.07	0.722
ENSMUSG00000087269	D330023K18Rik	199.176	0.231597	0.21001	1.10279	0.270118	0.467265	7.985	6.41
ENSMUSG00000000194	Gpr107	2078.69	0.0625374	0.128552	0.486477	0.626629	0.779493	6.453	5.787
ENSMUSG00000062661	Ncs1	860.169	1.99124	0.307071	6.48464	8.89439e-11	5.7634e-09	6.747	1.577
ENSMUSG00000055632	Hmcn2	11.7302	0.097915	0.735662	0.133098	0.894116	0.944149	0.021	0.018
ENSMUSG00000076441	Ass1	79.4427	1.50681	0.360409	4.18083	2.90447e-05	0.00037074	0.464	0.153
ENSMUSG00000026843	Fubp3	1728.66	0.0967854	0.203532	0.47553	0.634409	0.784821	8.795	7.711
ENSMUSG00000039356	Exosc2	1339.81	0.0774511	0.268532	0.288424	0.773022	0.876945	27.841	24.808
ENSMUSG00000087549	Gm13427	5.15087	-0.8894	1.01846	-0.87328	0.38251	0.582048	0.051	0.09
ENSMUSG00000026842	Abl1	2263.53	-0.00885383	0.17102	-0.0517706	0.958711	0.97908	4.124	3.9
ENSMUSG00000026841	Fibcd1	70.6675	2.72256	0.743576	3.66144	0.000250806	0.0022395	0.612	0.089
ENSMUSG00000026840	Lamc3	155.039	-1.069	0.397647	-2.68832	0.00718131	0.0333695	0.272	0.525
ENSMUSG00000001864	Aif1l	177.108	-0.649978	0.430468	-1.50993	0.13106	0.288284	1.342	1.98
ENSMUSG00000001855	Nup214	1525.39	0.114397	0.188418	0.607148	0.543753	0.716825	4.018	3.457
ENSMUSG00000050592	Fam78a	33.8518	2.1413	0.476291	4.49578	6.9317e-06	0.000112033	0.278	0.059
ENSMUSG00000051373	Plpp7	418.564	0.624208	0.231414	2.69736	0.00698913	0.0326916	5.651	3.448
ENSMUSG00000039262	Prrc2b	11063.2	-0.0628769	0.120709	-0.520899	0.602437	0.761501	24.291	23.735
ENSMUSG00000086216	Gm13610	6.18383	-0.12153	0.840108	-0.14466	0.88498	0.939387	0.424	0.429
ENSMUSG00000039254	Pomt1	595.915	-0.127229	0.2351	-0.541172	0.588389	0.751228	5.951	6.05
ENSMUSG00000002550	Uck1	1060.1	0.175087	0.190198	0.920547	0.357287	0.557355	43.958	36.528
ENSMUSG00000066068	Gm13611	4.26621	-0.495408	0.843137	-0.587578	0.556816	0.726545	2.831	3.729
ENSMUSG00000044627	Swi5	2999.96	0.00242511	0.186439	0.0130075	0.989622	0.994362	68.625	64.246
ENSMUSG00000002546	Golga2	2714.18	0.0811346	0.190563	0.425763	0.670281	0.809448	26.763	23.824
ENSMUSG00000026825	Dnm1	2290.04	1.87217	0.376249	4.97587	6.49564e-07	1.4752e-05	16.078	4.018
ENSMUSG00000039205	Ciz1	898.344	0.126753	0.16964	0.747192	0.454948	0.644875	6.962	5.969
ENSMUSG00000039195	1110008P14Rik	285.638	1.50459	0.29775	5.05321	4.3445e-07	1.04135e-05	16.293	5.32
ENSMUSG00000026822	Lcn2	93.2422	5.58346	0.77199	7.23256	4.73989e-13	5.02168e-11	13.685	0.273
ENSMUSG00000026820	Ptges2	473.988	1.23309	0.235109	5.24473	1.56513e-07	4.2463e-06	13.089	5.206
ENSMUSG00000026819	Slc25a25	3012.81	0.844161	0.330192	2.55658	0.0105708	0.0450237	16.729	8.849
ENSMUSG00000039164	Naif1	193.997	-0.0618524	0.191926	-0.322272	0.747246	0.860371	6.075	5.926
ENSMUSG00000103175	Gm37169	1.23595	1.39179	2.02166	0.688436	0.491178	NA	0.083	0.03
ENSMUSG00000039157	Fam102a	770.276	0.633847	0.18066	3.50851	0.000450617	0.00362591	5.653	3.408
ENSMUSG00000026810	Dpm2	557.016	0.304383	0.195893	1.55382	0.120226	0.272267	48.358	36.749
ENSMUSG00000075405	9430097D07Rik	11.9749	-1.58423	0.905357	-1.74984	0.0801461	0.20577	0.369	1.043
ENSMUSG00000046854	Pip5kl1	6.79006	1.01229	0.761679	1.32903	0.183839	0.36298	0.231	0.106
ENSMUSG00000079442	St6galnac4	1236.44	-2.31632	0.435488	-5.3189	1.04395e-07	2.96519e-06	6.946	32.508
ENSMUSG00000026811	St6galnac6	1274.74	-0.743707	0.357141	-2.08239	0.0373068	0.117694	7.957	12.364
ENSMUSG00000026817	Ak1	1260.98	-0.694515	0.415915	-1.66985	0.0949494	0.230774	11.597	17.212
ENSMUSG00000026814	Eng	217.706	-0.259027	0.26633	-0.97258	0.330762	0.531423	1.164	1.288
ENSMUSG00000009566	Fpgs	352.727	-0.258722	0.368176	-0.702713	0.482234	0.667048	3.255	3.69
ENSMUSG00000009555	Cdk9	870.176	0.172349	0.162199	1.06258	0.287972	0.487056	26.601	22.137
ENSMUSG00000059013	Sh2d3c	125.821	0.479452	0.245196	1.95538	0.0505378	0.146792	0.839	0.562
ENSMUSG00000009551	6330409D20Rik	4.38182	0.215863	0.98914	0.218233	0.827247	0.906664	0.107	0.086
ENSMUSG00000039021	Ttc16	362.417	-2.71235	0.656682	-4.13038	3.62162e-05	0.000446934	0.856	5.333
ENSMUSG00000009563	Tor2a	729.129	0.959791	0.391501	2.45156	0.0142237	0.0565027	41.471	19.889
ENSMUSG00000053746	Ptrh1	56.9239	0.125619	0.375015	0.334971	0.737647	0.854174	7	6.05
ENSMUSG00000038987	Cfap157	16.2739	-1.31017	0.710695	-1.8435	0.0652554	0.177314	0.285	0.652
ENSMUSG00000026797	Stxbp1	3043.64	0.300242	0.167444	1.79308	0.0729599	0.192067	11.819	8.942
ENSMUSG00000085397	Gm13524	5.46828	0.766666	0.851438	0.900436	0.367888	0.56793	0.838	0.456
ENSMUSG00000087496	Gm13523	10.4007	1.06804	0.594357	1.79697	0.0723404	0.190887	1.542	0.689
ENSMUSG00000026796	Fam129b	832.479	-0.330425	0.198879	-1.66144	0.0966252	0.233694	2.693	3.17
ENSMUSG00000026792	Lrsam1	847.712	0.0936542	0.177487	0.527668	0.59773	0.758719	4.675	4.111
ENSMUSG00000038900	Rpl12	7920.07	-0.0251819	0.313898	-0.0802231	0.93606	0.967172	464.28	445.508
ENSMUSG00000026791	Slc2a8	308.109	-0.0894339	0.243809	-0.366819	0.713754	0.838231	7.242	7.237
ENSMUSG00000038860	Garnl3	740.17	0.71646	0.32888	2.17848	0.0293701	0.0985156	1.371	0.783
ENSMUSG00000038831	Ralgps1	1102.54	0.193542	0.165498	1.16945	0.242221	0.436134	1.001	0.816
ENSMUSG00000004105	Angptl2	135.038	-1.72306	0.416832	-4.1337	3.56971e-05	0.000441042	0.395	1.213
ENSMUSG00000068966	Zbtb34	383.282	0.0559334	0.217797	0.256814	0.797323	0.889794	3.169	2.836
ENSMUSG00000026788	Zbtb43	1009.71	0.0263656	0.127303	0.207109	0.835925	0.912258	11.802	10.891
ENSMUSG00000038765	Lmx1b	19.6059	-3.17171	0.62048	-5.11171	3.19248e-07	7.93962e-06	0.01	0.089
ENSMUSG00000052951	C130021I20Rik	25.9332	-5.00761	0.832632	-6.0142	1.80782e-09	8.40044e-08	0.054	1.616
ENSMUSG00000085463	9430024E24Rik	30.0101	-1.52058	0.970261	-1.56719	0.11707	0.266875	1.307	3.433
ENSMUSG00000038740	Mvb12b	2260.67	-0.327765	0.147451	-2.22287	0.0262244	0.0901727	2.693	3.166
ENSMUSG00000087461	C230014O12Rik	189.071	1.17875	0.410214	2.87351	0.00405941	0.021639	0.211	0.086
ENSMUSG00000103413	Gm38389	34.802	1.62434	0.523885	3.10056	0.00193153	0.011988	0.418	0.126
ENSMUSG00000038718	Pbx3	1963.18	0.39841	0.150208	2.65239	0.00799242	0.036287	1.798	1.27
ENSMUSG00000084908	C79798	3.33699	1.24331	1.20021	1.03591	0.300246	0.501254	0.058	0.023
ENSMUSG00000038696	Mapkap1	2151.91	0.129889	0.142009	0.914651	0.360375	0.560563	2.123	1.817
ENSMUSG00000087635	Gm13414	70.3426	-0.0784443	0.282523	-0.277657	0.781276	0.882342	19.622	19.523
ENSMUSG00000026867	Gapvd1	4127.34	0.0157295	0.151056	0.10413	0.917066	0.95685	10.764	9.922
ENSMUSG00000026864	Hspa5	14074	-0.0821512	0.190214	-0.431889	0.665822	0.80627	508.262	503.159
ENSMUSG00000070953	Rabepk	2642.11	-0.710264	0.356939	-1.98988	0.0466045	0.138441	18.228	27.827
ENSMUSG00000035949	Fbxw2	1461.73	0.383693	0.171263	2.24037	0.0250669	0.0873159	16.575	11.908
ENSMUSG00000107167	Gm34653	3.7408	-0.86637	1.05086	-0.82444	0.40969	0.605998	0.052	0.088
ENSMUSG00000026869	Psmd5	2121.98	-0.305442	0.151026	-2.02245	0.0431296	0.130516	14.479	16.732
ENSMUSG00000026870	Cutal	243.365	-0.698867	0.566729	-1.23316	0.217517	0.406901	1.334	2.008
ENSMUSG00000026873	Phf19	191.952	-1.01522	0.360501	-2.81613	0.00486063	0.0249659	1.502	2.825
ENSMUSG00000086001	Gm13448	3.93697	0.193236	0.89186	0.216667	0.828468	0.90754	0.353	0.287
ENSMUSG00000026875	Traf1	101.941	-2.83058	0.559624	-5.05801	4.23655e-07	1.01894e-05	0.274	1.864
ENSMUSG00000083533	Gm13450	4.6664	-0.0252512	0.845034	-0.0298819	0.976161	0.98744	5.814	5.551
ENSMUSG00000026874	Hc	11.7578	0.610097	0.661381	0.922459	0.356289	0.556413	0.04	0.024
ENSMUSG00000035875	AI182371	6.72798	-0.043186	0.719336	-0.060036	0.952127	0.975609	0.077	0.074
ENSMUSG00000057110	Cntrl	1907.74	-0.0517829	0.333927	-0.155072	0.876764	0.934683	6.312	6.084
ENSMUSG00000026878	Rab14	3045.9	0.12414	0.133965	0.926661	0.354103	0.554511	30.675	26.285
ENSMUSG00000026879	Gsn	448.099	0.435764	0.303018	1.43808	0.150411	0.316837	2.039	1.386
ENSMUSG00000026880	Stom	2907.88	-0.308363	0.322355	-0.956594	0.338772	0.538947	22.684	25.966
ENSMUSG00000075391	Glo1-ps	18.8171	-0.424108	0.496612	-0.854002	0.393104	0.590241	5.75	7.17
ENSMUSG00000035778	Ggta1	168.312	1.2455	0.208738	5.9668	2.4195e-09	1.09311e-07	0.786	0.311
ENSMUSG00000086555	Gm13446	13.5858	2.49382	0.799574	3.11894	0.00181504	0.0114223	0.585	0.097
ENSMUSG00000026883	Dab2ip	1376.15	0.167257	0.267448	0.625379	0.531722	0.70688	1.849	1.535
ENSMUSG00000026885	Ttll11	445.286	0.464149	0.234983	1.97524	0.0482406	0.142106	0.398	0.269
ENSMUSG00000026895	Ndufa8	1483.37	0.183913	0.20533	0.895693	0.370417	0.570597	24.562	20.201
ENSMUSG00000026894	Morn5	46.3206	-1.38024	0.443278	-3.11372	0.00184744	0.0115781	0.126	0.309
ENSMUSG00000026890	Lhx6	19.9677	1.11687	0.823507	1.35624	0.175023	0.35046	0.329	0.141
ENSMUSG00000026889	Rbm18	2056.48	0.0129198	0.123604	0.104526	0.916752	0.956699	21.539	20.047
ENSMUSG00000026887	Mrrf	704.136	-0.234272	0.159387	-1.46983	0.141607	0.303942	2.311	2.55
ENSMUSG00000047250	Ptgs1	172.444	0.747824	0.337803	2.21379	0.0268434	0.0918137	2.262	1.242
ENSMUSG00000113163	Olfr335-ps	1.73752	-3.96112	2.21824	-1.7857	0.0741476	NA	0	0.581
ENSMUSG00000083101	Gm13430	3.51568	-0.126068	0.961143	-0.131165	0.895645	0.945	2.4	2.451
ENSMUSG00000083716	Gm13436	141.326	0.0909153	0.396205	0.229465	0.818507	0.901375	58.292	51.335
ENSMUSG00000009030	Pdcl	2342.83	-0.3535	0.139885	-2.52707	0.0115019	0.0480602	43.661	52.251
ENSMUSG00000075376	Rc3h2	4185.07	0.163199	0.121726	1.34071	0.180016	0.357988	16.906	14.12
ENSMUSG00000066798	Zbtb6	1635.87	0.239907	0.158675	1.51193	0.13055	0.287552	20.565	16.308
ENSMUSG00000035437	Rabgap1	4453.82	0.179955	0.150067	1.19916	0.230465	0.423193	8.009	6.646
ENSMUSG00000026915	Strbp	5593.38	0.20595	0.162434	1.26789	0.204836	0.39085	5.487	4.419
ENSMUSG00000035403	Crb2	273.798	-1.14926	0.496857	-2.31305	0.0207197	0.0757339	1.861	3.765
ENSMUSG00000035392	Dennd1a	2332.31	0.128025	0.163037	0.78525	0.432307	0.626303	0.944	0.809
ENSMUSG00000108155	Gm44443	5.48399	1.27046	0.809341	1.56974	0.116475	0.265905	0.32	0.125
ENSMUSG00000000247	Lhx2	274.549	3.41096	0.512654	6.65354	2.86124e-11	2.09058e-09	3.923	0.352
ENSMUSG00000098383	Gm27197	6.22978	6.20137	1.54106	4.02409	5.71952e-05	0.000661523	2.898	0
ENSMUSG00000085950	Gm13589	11.741	0.808317	0.725857	1.1136	0.265449	0.461992	0.076	0.041
ENSMUSG00000026749	Nek6	1016.66	-0.761138	0.250449	-3.03909	0.00237292	0.0141077	1.758	2.777
ENSMUSG00000026750	Psmb7	4341.51	0.197681	0.221028	0.894371	0.371123	0.571119	17.044	13.95
ENSMUSG00000026751	Nr5a1	18.3116	2.60605	0.734646	3.54736	0.000389111	0.00322317	0.33	0.051
ENSMUSG00000063972	Nr6a1	434.177	1.46554	0.268759	5.45299	4.95308e-08	1.55945e-06	0.634	0.217
ENSMUSG00000085201	Nr6a1os	44.9747	-1.17852	0.417755	-2.82108	0.00478627	0.0246675	0.19	0.407
ENSMUSG00000107468	5730507A11Rik	4.34687	-0.801663	1.05455	-0.760191	0.44714	0.638699	0.227	0.372
ENSMUSG00000046618	Olfml2a	318.638	-1.66225	0.475808	-3.49353	0.000476675	0.0037971	0.966	2.797
ENSMUSG00000085755	Gm13496	1.56438	2.67295	1.7779	1.50343	0.132728	NA	0.314	0.046
ENSMUSG00000035295	Wdr38	15.1273	-0.77842	0.523554	-1.4868	0.137067	0.297145	0.302	0.487
ENSMUSG00000062997	Rpl35	4791.49	0.202838	0.352001	0.576243	0.564451	0.732717	271.801	221.006
ENSMUSG00000026755	Arpc5l	815.345	0.642346	0.173653	3.69902	0.000216432	0.00198355	20.124	12.082
ENSMUSG00000026754	Golga1	1285.51	-0.152662	0.140166	-1.08915	0.276087	0.473915	5.208	5.432
ENSMUSG00000035236	Scai	1667.58	-0.0403262	0.162432	-0.248266	0.803929	0.89278	3.02	2.912
ENSMUSG00000026753	Ppp6c	1871.58	0.0624181	0.128698	0.484996	0.627679	0.780097	11.658	10.452
ENSMUSG00000083240	Gm13453	73.8837	1.562	0.745308	2.09578	0.036102	0.114898	25.068	7.678
ENSMUSG00000082536	Gm13456	711.848	-0.161902	0.362919	-0.44611	0.655518	0.799826	102.256	107.018
ENSMUSG00000049252	Lrp1b	450.127	2.38387	0.603793	3.94816	7.87538e-05	0.000869122	0.1	0.018
ENSMUSG00000080994	Gm13464	2.45779	-1.21102	1.26244	-0.959267	0.337424	0.537813	0.296	0.64
ENSMUSG00000026866	Kynu	9.33518	0.921737	0.752033	1.22566	0.220327	0.410599	0.015	0.007
ENSMUSG00000049744	Arhgap15	80.4808	0.793327	0.372249	2.13117	0.0330747	0.107399	0.029	0.016
ENSMUSG00000036890	Gtdc1	1456.68	-0.642701	0.141274	-4.54933	5.38164e-06	9.07172e-05	0.631	0.924
ENSMUSG00000026872	Zeb2	2757.73	-0.818207	0.148623	-5.50524	3.68667e-08	1.2018e-06	2.972	4.883
ENSMUSG00000052248	Zeb2os	53.4426	-1.20638	0.39169	-3.07994	0.00207043	0.012672	2.296	4.895
ENSMUSG00000100135	Gm28643	2.66563	-0.0296274	1.26897	-0.0233476	0.981373	0.989859	0.03	0.029
ENSMUSG00000085591	Gm13479	1.18551	0.387324	1.71989	0.225202	0.821822	NA	0.007	0.005
ENSMUSG00000086353	Gm13481	2.44029	0.845539	1.32345	0.638888	0.522896	0.699826	0.002	0.001
ENSMUSG00000052155	Acvr2a	1619.67	0.0724742	0.122616	0.591068	0.554475	0.724695	3.913	3.48
ENSMUSG00000026761	Orc4	1285.01	0.390002	0.164082	2.37687	0.0174603	0.0664807	6.425	4.591
ENSMUSG00000036792	Mbd5	1895	-0.133481	0.188069	-0.709744	0.477863	0.664138	0.9	0.921
ENSMUSG00000069495	Epc2	3044.32	0.000701366	0.239982	0.00292258	0.997668	0.998845	6.821	6.462
ENSMUSG00000026764	Kif5c	4382.1	1.53492	0.235265	6.52421	6.83598e-11	4.59833e-09	9.922	3.239
ENSMUSG00000026765	Lypd6b	221.497	-1.03045	0.481405	-2.14051	0.0323134	0.105809	0.159	0.306
ENSMUSG00000050447	Lypd6	1706.97	-2.31447	0.671705	-3.44566	0.000569657	0.0044198	0.626	2.888
ENSMUSG00000026766	Mmadhc	1415.02	-0.0722774	0.142965	-0.50556	0.613166	0.769715	16.44	16.228
ENSMUSG00000085862	Gm13483	359.49	-1.13389	0.419072	-2.70572	0.00681558	0.0320672	0.182	0.374
ENSMUSG00000083449	Gm13487	1.28734	0.24194	1.69767	0.142513	0.886675	NA	0.402	0.319
ENSMUSG00000085429	Gm13485	1.93271	-2.42585	2.26469	-1.07116	0.284096	NA	0.016	0.087
ENSMUSG00000017144	Rnd3	1891.53	-2.2423	0.367128	-6.10768	1.01092e-09	4.98147e-08	8.263	36.893
ENSMUSG00000087701	Gm13493	142.954	-0.187084	0.219538	-0.852173	0.394118	0.591208	55.22	59.2
ENSMUSG00000036249	Rbm43	229.177	-0.276014	0.229235	-1.20407	0.228563	0.420657	3.761	4.274
ENSMUSG00000026946	Nmi	92.4899	1.10787	0.380626	2.91064	0.00360686	0.0197789	1.088	0.477
ENSMUSG00000053475	Tnfaip6	16.597	1.68874	0.645645	2.61559	0.0089074	0.0394934	0.299	0.086
ENSMUSG00000036202	Rif1	4090.65	-0.136752	0.120301	-1.13675	0.255641	0.451248	15.844	16.241
ENSMUSG00000026950	Neb	23.4047	0.620113	0.623023	0.995329	0.319576	0.520058	0.028	0.017
ENSMUSG00000036093	Arl5a	2845.43	0.329478	0.0992282	3.32041	0.000898858	0.0064366	24.403	18.164
ENSMUSG00000085315	A430018G15Rik	122.533	-0.270946	0.324281	-0.835528	0.403421	0.599994	2.219	2.539
ENSMUSG00000017412	Cacnb4	505.607	2.19296	0.662397	3.31064	0.000930817	0.00660961	0.93	0.188
ENSMUSG00000025201	Bloc1s2-ps	3.38177	0.114117	1.46059	0.078131	0.937724	0.967482	1.27	1.118
ENSMUSG00000055371	Stam2	1887.65	-0.268927	0.116769	-2.30307	0.021275	0.0771384	6.886	7.752
ENSMUSG00000036053	Fmnl2	3308.46	0.231966	0.291179	0.796646	0.425656	0.620433	2.785	2.201
ENSMUSG00000061136	Prpf40a	4748.92	0.109807	0.169431	0.648094	0.516924	0.696054	18.132	15.78
ENSMUSG00000026960	Arl6ip6	1282.34	0.0304896	0.283768	0.107446	0.914436	0.955155	10.573	9.695
ENSMUSG00000083287	Gm13502	28.4346	-0.724681	0.384495	-1.88476	0.0594626	0.165326	5.955	9.186
ENSMUSG00000075334	Rprm	72.8526	1.05477	0.481371	2.19118	0.028439	0.0960616	18.432	8.336
ENSMUSG00000060988	Galnt13	250.816	0.594005	0.301917	1.96745	0.0491318	0.143951	0.081	0.05
ENSMUSG00000087040	Gm14033	1.01112	1.7986	3.56088	0.5051	0.613488	NA	0.006	0
ENSMUSG00000026824	Kcnj3	158.219	4.74254	0.950968	4.98706	6.13042e-07	1.40734e-05	0.541	0.019
ENSMUSG00000026826	Nr4a2	354.494	0.815815	0.448362	1.81955	0.0688282	0.184148	5.306	2.898
ENSMUSG00000084938	BB557941	48.3271	1.17158	0.449459	2.60664	0.00914363	0.0402879	0.271	0.115
ENSMUSG00000086396	4930555B11Rik	3.43129	-0.655886	1.02134	-0.642185	0.520753	0.698502	0.076	0.113
ENSMUSG00000054181	A930012O16Rik	29.9409	0.754878	0.455221	1.65827	0.0972636	0.234717	3.131	1.762
ENSMUSG00000026827	Gpd2	907.205	0.640118	0.149481	4.28229	1.84983e-05	0.000252878	1.73	1.033
ENSMUSG00000026828	Galnt5	1.60196	-1.62633	1.97474	-0.823565	0.410187	NA	0.003	0.008
ENSMUSG00000026830	Ermn	49.378	5.57023	0.852823	6.53152	6.51053e-11	4.43574e-09	3.633	0.071
ENSMUSG00000026832	Cytip	54.3709	1.92879	0.73903	2.60989	0.00905722	0.039982	0.222	0.055
ENSMUSG00000026834	Acvr1c	81.4605	3.50302	0.813278	4.30728	1.65271e-05	0.000229183	0.372	0.03
ENSMUSG00000086995	Gm13544	3.12565	5.40813	2.05042	2.63758	0.00835001	0.0375303	0.164	0
ENSMUSG00000026836	Acvr1	637.247	0.585387	0.334767	1.74864	0.0803537	0.206178	0.467	0.291
ENSMUSG00000026839	Upp2	606.578	0.490077	0.356965	1.3729	0.169783	0.343113	0.265	0.177
ENSMUSG00000036641	Ccdc148	469.009	-0.799329	0.31984	-2.49915	0.0124491	0.0511604	0.156	0.255
ENSMUSG00000026991	Pkp4	2743.63	0.197376	0.25629	0.770127	0.441224	0.633537	3.04	2.464
ENSMUSG00000026989	Dapl1	3.63245	-2.11233	1.37059	-1.54119	0.123271	0.276464	0.014	0.054
ENSMUSG00000081157	Gm13552	10.3865	0.522111	0.641521	0.813864	0.415723	0.611571	4.982	3.254
ENSMUSG00000035168	Tanc1	330.181	-0.237761	0.340705	-0.69785	0.485271	0.669689	0.251	0.273
ENSMUSG00000026988	Wdsub1	266.136	0.389805	0.211499	1.84306	0.0653203	0.1774	1.898	1.355
ENSMUSG00000026987	Baz2b	4409.49	-0.346626	0.171307	-2.02342	0.0430295	0.130306	2.452	2.92
ENSMUSG00000085975	Gm13572	7.66609	-0.356306	0.726423	-0.490494	0.623785	0.777401	0.901	1.076
ENSMUSG00000086603	Gm13620	3.48753	-0.211225	1.01673	-0.20775	0.835424	0.9119	1.048	1.148
ENSMUSG00000026977	Marchf7	3342.9	0.174066	0.184788	0.941977	0.346205	0.54626	18.359	15.394
ENSMUSG00000060703	Cd302	112.895	0.462103	0.302172	1.52927	0.126198	0.280942	0.802	0.539
ENSMUSG00000026980	Ly75	41.3148	1.62297	0.480281	3.37922	0.000726927	0.00542545	0.158	0.049
ENSMUSG00000054580	Pla2r1	913.62	0.350086	0.246633	1.41946	0.155765	0.324473	1.271	0.923
ENSMUSG00000086578	Gm13583	5.55098	-1.05466	0.971858	-1.0852	0.277835	0.475912	0.153	0.298
ENSMUSG00000026971	Itgb6	6.67728	-0.327575	0.998609	-0.328032	0.742888	0.857653	0.012	0.013
ENSMUSG00000026970	Rbms1	528.988	-1.5583	0.264829	-5.88417	4.0006e-09	1.72294e-07	0.297	0.823
ENSMUSG00000064289	Tank	698.84	0.407868	0.144908	2.81467	0.00488266	0.0250383	2.093	1.479
ENSMUSG00000081954	Gm13626	1.43281	0.309899	1.75338	0.176743	0.85971	NA	0.596	0.461
ENSMUSG00000026914	Psmd14	2924.63	0.400495	0.17663	2.26742	0.0233645	0.0826909	7.845	5.556
ENSMUSG00000035033	Tbr1	68.3623	4.43374	1.00393	4.41638	1.00366e-05	0.000151904	3.533	0.149
ENSMUSG00000026904	Slc4a10	1081.91	0.0656595	0.710707	0.0923863	0.926391	0.962087	1.031	0.899
ENSMUSG00000035000	Dpp4	158.289	2.05144	0.463235	4.42852	9.48818e-06	0.000145579	0.647	0.147
ENSMUSG00000087518	Gm13561	8.84007	2.03869	0.786877	2.59086	0.00957361	0.0417312	0.025	0.006
ENSMUSG00000087681	Gm13565	1.55194	4.43026	1.94157	2.28179	0.0225016	NA	0.194	0
ENSMUSG00000087422	Gm13564	1.28696	3.04341	2.05058	1.48418	0.137762	NA	0.168	0.016
ENSMUSG00000000392	Fap	127.156	-1.62109	0.480818	-3.37152	0.000747534	0.00554604	0.185	0.518
ENSMUSG00000026896	Ifih1	330.559	1.34556	0.416736	3.22881	0.00124308	0.00840178	1.803	0.676
ENSMUSG00000026893	Gca	276.419	-0.0218303	0.277524	-0.0786609	0.937302	0.967482	1.765	1.7
ENSMUSG00000059742	Kcnh7	269.462	3.56324	0.852346	4.18051	2.90857e-05	0.00037104	0.303	0.024
ENSMUSG00000075324	Fign	552.198	-0.877481	0.314669	-2.78859	0.00529386	0.0265432	0.566	0.965
ENSMUSG00000082127	Gm13577	111.989	-0.640139	0.223865	-2.85949	0.00424327	0.0224184	88.51	129.8
ENSMUSG00000026888	Grb14	42.3149	0.576535	0.502741	1.14678	0.251471	0.446657	0.103	0.063
ENSMUSG00000034903	Cobll1	160.318	1.84431	0.680169	2.71155	0.00669684	0.0316669	0.354	0.095
ENSMUSG00000086881	Gm13594	3.03788	0.203346	1.39406	0.145866	0.884027	0.938868	0.758	0.638
ENSMUSG00000061171	Slc38a11	9.73602	0.917037	0.719097	1.27526	0.202217	0.387411	0.066	0.033
ENSMUSG00000057182	Scn3a	97.0187	3.09987	0.577637	5.36646	8.02985e-08	2.37301e-06	0.466	0.049
ENSMUSG00000075318	Scn2a	588.048	4.98133	0.806738	6.17465	6.6309e-10	3.46064e-08	2.259	0.065
ENSMUSG00000044647	Csrnp3	2309.86	1.24698	0.196916	6.33256	2.41134e-10	1.37719e-08	3.548	1.391
ENSMUSG00000026994	Galnt3	11.4304	-0.0172093	0.580805	-0.02963	0.976362	0.98744	0.064	0.06
ENSMUSG00000034848	Ttc21b	784.432	0.0620169	0.248326	0.24974	0.802788	0.89254	2.189	1.935
ENSMUSG00000064329	Scn1a	219.572	6.5387	1.56536	4.17713	2.9521e-05	0.000375237	0.753	0.008
ENSMUSG00000087301	Gm13629	5.20997	3.8825	1.55446	2.49765	0.012502	0.0512985	0.028	0.002
ENSMUSG00000075316	Scn9a	5.04793	1.23451	0.860905	1.43397	0.151582	0.318417	0.012	0.005
ENSMUSG00000034810	Scn7a	175.3	-0.668564	0.776095	-0.861445	0.388993	0.586729	0.066	0.098
ENSMUSG00000027022	Xirp2	2.99499	1.1565	1.5731	0.735173	0.462234	0.651389	0.003	0.001
ENSMUSG00000087467	Gm13601	2.39164	3.13036	1.75805	1.78058	0.0749805	0.196311	0.049	0.005
ENSMUSG00000034780	B3galt1	371.784	0.791983	0.456993	1.73303	0.0830905	0.211281	0.186	0.099
ENSMUSG00000027030	Stk39	1267.32	-0.461714	0.153993	-2.99827	0.00271513	0.0157403	0.826	1.059
ENSMUSG00000075312	Gm13597	57.7434	-0.476535	0.300788	-1.58429	0.113128	0.260664	24.955	32.602
ENSMUSG00000027035	Cers6	599.428	1.10074	0.246839	4.45936	8.22055e-06	0.000128835	0.689	0.3
ENSMUSG00000034738	Nostrin	35.5385	2.24463	0.468701	4.78904	1.67579e-06	3.27869e-05	0.278	0.055
ENSMUSG00000005233	Spc25	1268.69	-0.345521	0.410253	-0.842215	0.399668	0.596756	21.982	26.134
ENSMUSG00000027068	Dhrs9	2.08556	0.480124	1.81752	0.264164	0.791653	0.887484	0.009	0.006
ENSMUSG00000027070	Lrp2	102.851	1.01528	0.637666	1.59218	0.111343	0.257786	0.201	0.092
ENSMUSG00000063145	Bbs5	589.043	0.180366	0.233028	0.774008	0.438926	0.631563	6.24	5.149
ENSMUSG00000075307	Klhl41	30.5545	1.2549	0.644761	1.94631	0.0516178	0.148928	0.673	0.258
ENSMUSG00000027086	Fastkd1	382.486	1.01832	0.219003	4.64977	3.32301e-06	5.95193e-05	3.698	1.701
ENSMUSG00000042133	Ppig	2138.46	0.160012	0.113156	1.41408	0.157339	0.32651	14.509	12.168
ENSMUSG00000070883	Ccdc173	192.726	-0.102556	0.211107	-0.4858	0.627109	0.779847	1.182	1.187
ENSMUSG00000027088	Phospho2	714.596	0.744007	0.154369	4.81968	1.43788e-06	2.89062e-05	16.606	9.269
ENSMUSG00000081857	Gm13624	1.4002	-0.93372	1.70338	-0.548157	0.583584	NA	0.603	1.098
ENSMUSG00000042155	Klhl23	2013.95	0.418147	0.229164	1.82466	0.0680521	0.182688	31.134	21.776
ENSMUSG00000068882	Ssb	5241.09	0.230391	0.160612	1.43445	0.151443	0.31825	115.549	92.58
ENSMUSG00000051730	Mettl5	302.222	-0.0875091	0.151023	-0.579441	0.562292	0.730945	4.197	4.176
ENSMUSG00000085735	Mettl5os	8.75816	1.27171	0.639883	1.98741	0.0468773	0.139057	1.111	0.434
ENSMUSG00000044308	Ubr3	4391.21	0.557414	0.141345	3.94365	8.02508e-05	0.000882425	8.219	5.226
ENSMUSG00000042064	Myo3b	23.9323	0.992897	0.472601	2.10092	0.0356479	0.113825	0.019	0.009
[truncated: 21,051 more rows]

## Sheet: Supplemental Table S5
Supplemental Table S5: DESeq2 output for genes at P90 vs. P49 time-point comparison.
DESeq2 output P90 vs P49 (RNA-seq)
gene_id	gene_name	baseMean	log2FoldChange	lfcSE	stat	pvalue	padj	mean_tpm_p90	mean_tpm_p49
ENSMUSG00000051951	Xkr4	1105.64	0.147953	0.606453	0.243964	0.807259	0.912836	0.5	0.466
ENSMUSG00000103147	Gm7341	2.13309	-0.187884	1.37417	-0.136726	0.891248	NA	0.523	0.595
ENSMUSG00000102343	Gm37381	15.253	-3.27545	1.09139	-3.00117	0.00268946	0.023718	0.004	0.041
ENSMUSG00000025900	Rp1	10893.9	-1.07061	0.790237	-1.3548	0.175482	0.408697	2.272	4.573
ENSMUSG00000025902	Sox17	23.5293	0.848119	0.621682	1.36423	0.172494	0.404188	1.051	0.578
ENSMUSG00000098104	Gm6085	28.6713	1.2568	0.479801	2.61942	0.00880796	0.0564918	5.29	2.307
ENSMUSG00000103922	Gm6123	71.1032	-0.535102	0.388379	-1.37778	0.16827	0.398431	10.662	16.263
ENSMUSG00000033845	Mrpl15	1231.15	0.291736	0.16603	1.75713	0.078896	0.249727	23.416	20.071
ENSMUSG00000104217	Gm37988	9.51353	0.384913	0.735997	0.522982	0.600987	0.793891	0.032	0.025
ENSMUSG00000033813	Tcea1	1902.35	0.313201	0.125752	2.49062	0.012752	0.0731074	11.486	9.59
ENSMUSG00000062588	Gm6104	44.0902	0.38452	0.457624	0.840253	0.400767	0.647511	14.234	11.711
ENSMUSG00000103280	Gm37277	12.7813	0.999107	0.770743	1.29629	0.194875	0.436089	4.148	2.053
ENSMUSG00000002459	Rgs20	302.817	0.496588	0.330053	1.50457	0.132434	0.344362	0.578	0.413
ENSMUSG00000085623	Gm16041	4.83576	1.11156	0.959395	1.15861	0.246615	0.49836	0.278	0.126
ENSMUSG00000033793	Atp6v1h	3667.75	0.0537836	0.198211	0.271345	0.786125	0.90192	8.838	8.747
ENSMUSG00000025905	Oprk1	2.93926	-0.20223	1.47159	-0.137422	0.890697	0.952831	0.027	0.033
ENSMUSG00000033774	Npbwr1	7.76872	2.05928	1.24888	1.6489	0.0991685	0.287404	0.639	0.15
ENSMUSG00000025907	Rb1cc1	4238.17	0.188158	0.176309	1.06721	0.285879	0.541822	13.519	12.087
ENSMUSG00000090031	4732440D04Rik	106.572	0.541636	0.319141	1.69717	0.0896646	0.270048	5.295	3.73
ENSMUSG00000103845	Gm19026	17.6537	0.00405058	0.535897	0.0075585	0.993969	0.997526	0.333	0.341
ENSMUSG00000033740	St18	43.4182	-0.436323	0.765464	-0.570011	0.56867	0.774664	0.021	0.032
ENSMUSG00000102135	Gm37108	5.12299	-0.108134	0.903852	-0.119637	0.904771	0.95974	0.148	0.172
ENSMUSG00000051285	Pcmtd1	2190.88	-0.317015	0.205675	-1.54134	0.123234	0.329822	4.971	6.296
ENSMUSG00000048538	Gm9826	75.8146	-0.0575911	0.523401	-0.110032	0.912384	0.96343	11.73	12.999
ENSMUSG00000097797	Gm26901	28.5793	-0.339896	0.450826	-0.75394	0.450885	0.690918	0.103	0.134
ENSMUSG00000025909	Sntg1	102.575	3.432	0.670387	5.11943	3.06466e-07	1.67724e-05	0.059	0.006
ENSMUSG00000076135	Gm24276	1.93258	1.07016	1.68265	0.635994	0.524781	NA	6.277	3.177
ENSMUSG00000061024	Rrs1	570.169	0.194813	0.157843	1.23422	0.217121	0.463849	66.348	60.762
ENSMUSG00000025911	Adhfe1	65.1667	1.38994	0.449547	3.09187	0.00198901	0.018963	0.687	0.268
ENSMUSG00000079671	2610203C22Rik	8.4464	1.24094	0.799338	1.55246	0.120552	0.325626	0.028	0.012
ENSMUSG00000067879	Vxn	254.24	6.75777	0.91421	7.39192	1.44719e-13	5.5588e-11	6.117	0.058
ENSMUSG00000025912	Mybl1	1090.49	0.665368	0.231833	2.87004	0.00410426	0.0324801	6.337	4.184
ENSMUSG00000045210	Vcpip1	2650.25	0.0560269	0.158891	0.352613	0.724379	0.867233	19.262	18.968
ENSMUSG00000097893	1700034P13Rik	18.2154	0.624899	0.555472	1.12499	0.260595	0.513759	0.116	0.08
ENSMUSG00000025915	Sgk3	260.775	0.509703	0.333645	1.52768	0.126592	0.335048	0.66	0.487
ENSMUSG00000046334	Gm6195	22.1882	0.734798	0.526309	1.39613	0.162674	0.389719	15.334	9.748
ENSMUSG00000046101	Mcmdc2	11.371	0.2311	0.530217	0.435859	0.662939	0.829804	0.083	0.074
ENSMUSG00000098234	Snhg6	431.86	0.29001	0.253069	1.14597	0.251806	0.503466	43.825	37.42
ENSMUSG00000099032	Tcf24	62.6928	0.0211482	0.713587	0.0296365	0.976357	0.991058	1.345	1.439
ENSMUSG00000025916	Ppp1r42	98.8271	0.301415	0.521706	0.577748	0.563434	0.770687	0.563	0.458
ENSMUSG00000025917	Cops5	2176.27	0.367033	0.156477	2.34561	0.0189962	0.0969599	38.503	31.166
ENSMUSG00000056763	Cspp1	1103.41	0.425352	0.179624	2.36801	0.0178839	0.0928068	2.627	2.006
ENSMUSG00000067851	Arfgef1	3421.07	0.0504196	0.163288	0.308778	0.757491	0.885203	8.69	8.635
ENSMUSG00000042501	Cpa6	2.67876	0.788236	1.2345	0.638509	0.523143	0.74373	0.003	0.002
ENSMUSG00000048960	Prex2	689.943	1.1562	0.503801	2.29495	0.0217358	0.107013	0.796	0.361
ENSMUSG00000057715	A830018L16Rik	169.036	2.62676	0.822457	3.19379	0.00140418	0.0145846	0.137	0.022
ENSMUSG00000016918	Sulf1	553.75	-0.324595	0.47849	-0.678375	0.497534	0.726607	0.405	0.53
ENSMUSG00000025938	Slco5a1	12.8466	1.13794	0.807603	1.40903	0.158826	0.383914	0.036	0.017
ENSMUSG00000005886	Ncoa2	3054.33	0.165105	0.205742	0.802487	0.422271	0.666927	2.768	2.512
ENSMUSG00000101476	Gm29570	3.09578	0.880788	1.20864	0.728745	0.466158	0.702182	0.05	0.027
ENSMUSG00000025935	Tram1	3124.66	-0.159036	0.140147	-1.13478	0.256468	0.509106	23.757	27.53
ENSMUSG00000025937	Lactb2	244.565	-0.718303	0.237829	-3.02025	0.00252566	0.0226294	1.163	1.969
ENSMUSG00000097711	Gm5523	1.47607	0.0551025	1.87647	0.0293649	0.976574	NA	0.14	0.142
ENSMUSG00000102166	Gm36947	3.07396	0.0461662	1.37385	0.0336035	0.973193	0.989853	0.155	0.163
ENSMUSG00000025932	Eya1	74.0614	-0.696806	0.484028	-1.4396	0.149981	0.372047	0.088	0.149
ENSMUSG00000054493	Gm9947	1.96088	1.95528	1.55122	1.26048	0.207496	NA	0.032	0.01
ENSMUSG00000025930	Msc	9.93723	-0.583633	1.25434	-0.46529	0.641724	0.817624	0.806	1.374
ENSMUSG00000081201	Smt3h2-ps4	3.47611	0.947567	1.00945	0.938698	0.347886	0.600069	3.117	1.755
ENSMUSG00000082193	Rpl5-ps1	6.5438	0.325182	0.739182	0.439922	0.659994	0.827816	1.783	1.5
ENSMUSG00000032769	Trpa1	1.25606	0.446874	2.25131	0.198495	0.842658	NA	0.008	0.007
ENSMUSG00000073737	Gm10566	1.69546	0.751899	1.92031	0.391552	0.69539	NA	0.346	0.201
ENSMUSG00000092083	Kcnb2	2534	0.701513	0.496904	1.41177	0.158019	0.383076	1.069	0.67
ENSMUSG00000025925	Terf1	673.151	0.55352	0.196961	2.8103	0.00494957	0.037455	3.945	2.778
ENSMUSG00000104379	Gm37509	15.704	0.330279	0.544471	0.606606	0.544112	0.75744	0.984	0.786
ENSMUSG00000032719	Sbspon	7.54583	-0.652811	1.04773	-0.623074	0.533236	0.750547	0.02	0.03
ENSMUSG00000067795	4930444P10Rik	6.48876	-0.117633	1.14319	-0.102899	0.918043	0.966082	0.046	0.051
ENSMUSG00000043716	Rpl7	16369.1	0.399245	0.250617	1.59305	0.111149	0.308586	1108.38	891.409
ENSMUSG00000025921	Rdh10	316.382	-0.14303	0.20431	-0.700061	0.483889	0.716086	2.269	2.618
ENSMUSG00000025920	Stau2	1470.83	-0.0575678	0.206784	-0.278396	0.780708	0.899037	1.1	1.161
ENSMUSG00000025939	Ube2w	1369.71	0.108282	0.154059	0.702859	0.482144	0.714585	3.996	3.819
ENSMUSG00000102457	Gm38342	5.41062	0.808915	0.838653	0.964541	0.334775	0.588566	0.513	0.308
ENSMUSG00000079658	Eloc	1591.73	0.322545	0.128987	2.50059	0.0123986	0.0718158	23.558	19.552
ENSMUSG00000097744	D030040B21Rik	3.79681	1.3446	1.15077	1.16844	0.242629	0.49391	0.249	0.107
ENSMUSG00000100959	Gm7654	1.82659	0.0247839	1.61412	0.0153544	0.987749	NA	0.609	0.589
ENSMUSG00000025940	Tmem70	790.271	0.481577	0.156059	3.08587	0.00202961	0.0192054	15.738	11.754
ENSMUSG00000025779	Ly96	22.2915	-0.21233	0.420551	-0.504885	0.61364	0.801822	0.202	0.246
ENSMUSG00000091020	Gm5828	5.07849	-0.542083	2.11788	-0.255955	0.797985	0.908325	0.559	0.94
ENSMUSG00000101640	Gm28376	6.07679	2.52733	1.01545	2.48888	0.0128145	0.0733037	0.016	0.003
ENSMUSG00000042686	Jph1	398.167	0.584582	0.462088	1.26509	0.20584	0.45004	0.597	0.424
ENSMUSG00000025777	Gdap1	1193.32	0.860999	0.194806	4.41978	9.88023e-06	0.000290689	21.352	12.224
ENSMUSG00000099899	Gm28784	1.41308	-0.525679	2.04173	-0.257468	0.796818	NA	0.074	0.104
ENSMUSG00000101589	Rbm6-ps1	20.9484	0.29957	0.459533	0.651901	0.514465	0.738633	1.54	1.29
ENSMUSG00000067780	Pi15	30.7585	-2.67306	1.15953	-2.3053	0.02115	0.1048	0.007	0.05
ENSMUSG00000085125	Gm16070	4.95265	3.10671e-05	1.18136	2.62976e-05	0.999979	1	0.011	0.011
ENSMUSG00000025776	Crispld1	109.182	-1.66451	0.710954	-2.34123	0.0192202	0.0978079	0.116	0.385
ENSMUSG00000109887	Gm28756	2.27046	1.13807	1.81772	0.626096	0.531252	NA	0.01	0.004
ENSMUSG00000089787	Gm15825	107.388	-0.520949	0.87494	-0.595412	0.551568	0.762048	0.327	0.473
ENSMUSG00000042596	Tfap2d	337.483	-0.72334	0.809342	-0.893738	0.371462	0.622013	0.42	0.686
ENSMUSG00000100720	Gm10075	2.57444	0.036881	1.48238	0.0248796	0.980151	0.992543	0.638	0.667
ENSMUSG00000025927	Tfap2b	15.0738	-2.24559	0.816798	-2.74925	0.0059731	0.0429145	0.023	0.114
ENSMUSG00000100204	Gm4849	5.78897	-0.445548	0.879749	-0.506449	0.612542	0.800942	0.4	0.568
ENSMUSG00000043760	Pkhd1	5.80125	-0.104716	1.00191	-0.104517	0.916759	0.965763	0.002	0.002
ENSMUSG00000041872	Il17f	16.1678	0.703859	0.600571	1.17198	0.241204	0.492112	0.226	0.14
ENSMUSG00000041859	Mcm3	3362.02	0.599639	0.413808	1.44908	0.147316	0.367441	45.867	32.606
ENSMUSG00000025931	Paqr8	503.153	1.88836	0.492675	3.83288	0.000126652	0.00221129	4.786	1.317
ENSMUSG00000100929	Gm28064	1.30097	4.44376	2.79062	1.59239	0.111297	NA	0.686	0
ENSMUSG00000041809	Efhc1	198.589	-0.221588	0.322968	-0.686099	0.492651	0.722454	0.845	1.032
ENSMUSG00000041779	Tram2	52.7742	-0.218775	0.412015	-0.530988	0.595427	0.790726	0.119	0.151
ENSMUSG00000099971	Gm28287	2.20914	0.564494	1.48476	0.380193	0.703802	NA	0.255	0.166
ENSMUSG00000100819	Gm2693	11.144	0.268547	0.769975	0.348774	0.727259	0.869074	0.313	0.272
ENSMUSG00000025933	Tmem14a	146.045	0.359184	0.214626	1.67354	0.0942218	0.278423	3.423	2.745
ENSMUSG00000102633	Gm38224	1.22166	1.03439	1.81432	0.570122	0.568595	NA	0.132	0.062
ENSMUSG00000025934	Gsta3	39.1833	-1.86896	0.530259	-3.52461	0.000424105	0.0057122	0.158	0.575
ENSMUSG00000099343	Gm28836	1.51979	1.69622	1.71764	0.987526	0.323385	NA	0.032	0.01
ENSMUSG00000096375	Gm7094	1.81795	-1.41135	1.55306	-0.908755	0.36348	NA	0.412	1.08
ENSMUSG00000028033	Kcnq5	218.902	3.26483	0.863117	3.7826	0.000155197	0.00257941	0.196	0.021
ENSMUSG00000041670	Rims1	305.903	3.0155	0.882751	3.41603	0.000635413	0.00784975	0.32	0.044
ENSMUSG00000101227	Gm29506	6.75765	-0.196561	0.924003	-0.212728	0.831539	0.924857	0.007	0.009
ENSMUSG00000102766	Gm6420	2.42812	-0.803655	1.14782	-0.700157	0.483829	0.716086	0.478	0.889
ENSMUSG00000065405	Mir30a	1.77184	0.805235	1.47172	0.54714	0.584282	NA	6.817	3.824
ENSMUSG00000097970	Gm27028	4.99312	0.6007	1.17959	0.509244	0.610581	0.799909	2.938	1.83
ENSMUSG00000026158	Ogfrl1	593.943	0.578636	0.285217	2.02876	0.042483	0.167653	5.065	3.469
ENSMUSG00000026156	B3gat2	19.5306	0.346096	0.640732	0.540157	0.589089	0.787046	0.046	0.036
ENSMUSG00000026155	Smap1	1544.52	0.210801	0.123642	1.70493	0.0882069	0.26734	4.407	3.918
ENSMUSG00000026154	Sdhaf4	569.597	-0.0332653	0.216887	-0.153376	0.878102	0.946997	12.037	12.589
ENSMUSG00000026153	Fam135a	2166.45	0.0480902	0.149885	0.320849	0.748325	0.880218	5.095	5.081
ENSMUSG00000102398	Gm37580	11.7946	1.16651	0.596147	1.95675	0.0503764	0.187663	1.189	0.549
ENSMUSG00000026147	Col9a1	8.23222	1.54088	0.788783	1.95349	0.0507618	0.188665	0.021	0.008
ENSMUSG00000026141	Col19a1	38.5704	1.01397	0.648333	1.56397	0.117825	0.32102	0.043	0.022
ENSMUSG00000099997	Tubb4b-ps2	8.81895	0.298212	0.655662	0.454825	0.649235	0.8217	1.503	1.252
ENSMUSG00000100131	Gm28439	97.9582	-1.01458	0.369383	-2.7467	0.00601988	0.0431117	17.52	35.677
ENSMUSG00000067736	Gm10222	23.564	-1.29423	0.606655	-2.13339	0.0328924	0.141635	11.758	28.709
ENSMUSG00000101939	Gm28438	407.136	-0.722656	0.31949	-2.26191	0.0237032	0.113317	190.059	318.035
ENSMUSG00000101111	Gm28437	2103.81	-0.540985	0.251239	-2.15327	0.0312975	0.137391	472.373	707.39
ENSMUSG00000100862	Gm10925	952.489	-0.653337	0.254157	-2.5706	0.0101522	0.0623306	252.082	406.959
ENSMUSG00000102070	Gm28661	811.919	-0.444585	0.270699	-1.64236	0.100516	0.289488	225.096	315.687
ENSMUSG00000101249	Gm29216	1213.39	-0.19736	0.249721	-0.790322	0.42934	0.673782	506.802	603.763
ENSMUSG00000073725	Lmbrd1	2680.15	-0.447654	0.247672	-1.80744	0.0706929	0.232345	5.798	8.019
ENSMUSG00000033569	Adgrb3	1155.94	0.926584	0.438067	2.11517	0.0344157	0.145952	0.404	0.22
ENSMUSG00000104516	Gm9884	4.35691	0.143644	1.07583	0.13352	0.893782	0.954478	0.563	0.508
ENSMUSG00000086240	Gm7846	43.5512	0.539427	0.337916	1.59633	0.110414	0.307163	39.196	28.322
ENSMUSG00000081557	Gm5697	2.05254	0.256855	1.29507	0.198334	0.842784	NA	0.195	0.168
ENSMUSG00000099492	Gm5525	5.29136	-0.609629	0.809173	-0.753397	0.451211	0.691213	0.738	1.175
ENSMUSG00000100261	Gm6473	11.4088	0.36838	0.690244	0.533696	0.593552	0.789752	1.498	1.167
ENSMUSG00000048874	Phf3	4225.64	0.183411	0.175756	1.04355	0.296693	0.552665	13.146	11.85
ENSMUSG00000117310	Ptp4a1	4.11637	1.26611	1.13407	1.11642	0.264241	0.518278	0.117	0.052
ENSMUSG00000117091	Gm5698	1.35202	3.90004	2.1848	1.78508	0.074249	NA	0.768	0
ENSMUSG00000086727	4931428L18Rik	3.29511	-0.690443	1.44219	-0.478745	0.63212	0.812381	0.003	0.005
ENSMUSG00000070960	Gm19680	13.9546	0.229353	0.601684	0.381185	0.703066	0.854857	1.966	1.816
ENSMUSG00000026058	Khdrbs2	66.2913	1.99768	0.749175	2.66651	0.00766439	0.0508255	0.06	0.016
ENSMUSG00000100481	Gm7114	5.38266	0.0148441	0.825825	0.0179749	0.985659	0.99456	0.734	0.739
ENSMUSG00000026134	Prim2	1353.06	0.388683	0.250487	1.55171	0.120731	0.325815	1.368	1.108
ENSMUSG00000103746	1700001G17Rik	12.2787	0.53962	0.564246	0.956356	0.338892	0.591896	3.191	2.325
ENSMUSG00000004768	Rab23	362.956	0.25422	0.168061	1.51266	0.130366	0.341075	3.699	3.185
ENSMUSG00000042215	Bag2	186.037	-0.536716	0.347942	-1.54254	0.122942	0.329459	2.541	3.779
ENSMUSG00000042197	Zfp451	2459.37	0.397015	0.125506	3.16332	0.0015598	0.0157975	11.158	8.763
ENSMUSG00000081402	Gm15455	4.69254	0.135544	0.935835	0.144837	0.884839	0.949764	0.323	0.304
ENSMUSG00000042182	Bend6	160.56	1.40414	0.567534	2.47411	0.0133568	0.0753661	1.073	0.416
ENSMUSG00000026131	Dst	7328.46	1.11319	0.191521	5.81235	6.16029e-09	6.23301e-07	6.722	3.167
ENSMUSG00000096992	Gm26788	53.6601	-1.03006	0.657373	-1.56694	0.117129	0.319755	0.489	0.991
ENSMUSG00000101462	Gm3052	13.9176	0.197567	0.668913	0.295355	0.767723	0.890859	1.318	1.128
ENSMUSG00000102336	Gm37233	124.352	0.62088	0.350669	1.77056	0.0766339	0.245337	5.633	3.702
ENSMUSG00000042111	Ccdc115	1035.75	0.294673	0.161737	1.82193	0.0684663	0.227734	74.131	63.129
ENSMUSG00000026127	Imp4	1023.39	-0.103396	0.149923	-0.689662	0.490407	0.721091	21.298	23.862
ENSMUSG00000026126	Ptpn18	63.7222	0.247405	0.472536	0.523568	0.600579	0.793604	0.832	0.737
ENSMUSG00000100280	Gm28417	3.34699	0.170856	0.993279	0.172012	0.863428	0.940511	0.177	0.165
ENSMUSG00000045174	Amer3	92.9402	1.6643	0.378673	4.39509	1.10729e-05	0.000317229	3.351	1.099
ENSMUSG00000037509	Arhgef4	984.914	-0.0431007	0.388536	-0.110931	0.911671	0.963151	1.553	1.592
ENSMUSG00000104002	Gm38336	11.9423	0.743342	0.652435	1.13933	0.254563	0.506927	1.035	0.635
ENSMUSG00000037503	Fam168b	7826.99	0.221445	0.148903	1.48717	0.136969	0.351871	54.625	48.137
ENSMUSG00000026123	Plekhb2	11792.7	-1.31386	0.356853	-3.68178	0.00023161	0.00349386	51.934	128.651
ENSMUSG00000045216	Hs6st1	825.232	0.0492788	0.148477	0.331895	0.739968	0.875763	4.877	4.904
ENSMUSG00000037470	Uggt1	3378.63	0.193046	0.171206	1.12757	0.259503	0.512631	7.412	6.848
ENSMUSG00000047180	Neurl3	56.1704	-0.0548685	0.495862	-0.110653	0.911892	0.963179	1.411	1.606
ENSMUSG00000037447	Arid5a	225.241	1.01746	0.245387	4.14637	3.37786e-05	0.000759909	4.555	2.384
ENSMUSG00000010453	Kansl3	2837.23	0.24334	0.120646	2.01698	0.0436975	0.170853	19.553	17.144
ENSMUSG00000037432	Fer1l5	1.07184	0.0639933	1.82875	0.034993	0.972085	NA	0.004	0.004
ENSMUSG00000001143	Lman2l	802.933	-0.349288	0.211383	-1.65239	0.0984544	0.286295	5.849	7.61
ENSMUSG00000037408	Cnnm4	1226.2	-0.124783	0.146436	-0.852131	0.394142	0.641501	7.305	8.221
ENSMUSG00000001138	Cnnm3	1931.71	0.262931	0.25986	1.01182	0.311626	0.566796	23.727	20.765
ENSMUSG00000102845	Gm38033	2.54999	1.79403	1.51449	1.18458	0.236182	0.486195	0.689	0.191
ENSMUSG00000109510	Gm42417	5.5006	1.56305	0.822545	1.90026	0.0573995	0.203177	0.195	0.068
ENSMUSG00000079610	Ankrd39	163.218	0.236009	0.197549	1.19469	0.23221	0.481746	3.504	3.091
ENSMUSG00000026121	Sema4c	450.618	0.65906	0.339057	1.9438	0.0519194	0.191022	10.997	7.365
ENSMUSG00000087589	D430040D24Rik	88.5536	0.249962	0.405155	0.616955	0.537264	0.753425	1.898	1.639
ENSMUSG00000046337	Fam178b	13.1332	0.463444	0.656261	0.706188	0.480071	0.713372	0.022	0.016
ENSMUSG00000061518	Cox5b	3005.08	0.24578	0.195631	1.25634	0.208992	0.453823	329.766	291.533
ENSMUSG00000037351	Actr1b	3458.01	0.36221	0.124995	2.89779	0.00375798	0.0304603	50.069	40.676
ENSMUSG00000102416	4933424G06Rik	18.2795	-0.182796	0.526239	-0.347363	0.728319	0.869362	0.083	0.098
ENSMUSG00000026117	Zap70	8.18441	1.01214	0.752893	1.34433	0.17884	0.413915	0.125	0.061
ENSMUSG00000026116	Tmem131	1751.13	0.306458	0.20297	1.50987	0.131077	0.342263	2.785	2.349
ENSMUSG00000050122	Vwa3b	45.2543	0.718439	0.529175	1.35766	0.174572	0.407263	0.064	0.039
ENSMUSG00000026114	Cnga3	1141.22	1.21473	0.365306	3.32524	0.00088341	0.0101855	7.867	3.492
ENSMUSG00000026113	Inpp4a	926.276	0.320887	0.264223	1.21446	0.224574	0.473289	2.171	1.765
ENSMUSG00000026112	Coa5	1469.6	-0.109034	0.16634	-0.65549	0.512153	0.737395	23.877	26.625
ENSMUSG00000026111	Unc50	931.541	0.538612	0.113797	4.73309	2.21127e-06	8.4313e-05	27.334	19.545
ENSMUSG00000026110	Mgat4a	262.747	0.363231	0.263575	1.37809	0.168175	0.398334	0.702	0.559
ENSMUSG00000026090	2010300C02Rik	223.845	3.29659	0.735487	4.48219	7.38819e-06	0.000230099	1.053	0.109
ENSMUSG00000060771	Tsga10	577.752	-0.581834	0.33238	-1.75051	0.0800304	0.252186	0.794	1.188
ENSMUSG00000097268	Gm26805	10.299	0.708308	0.748262	0.946604	0.343841	0.596538	0.51	0.323
ENSMUSG00000037216	Lipt1	121.569	-0.00392478	0.218809	-0.017937	0.985689	0.99456	5.852	6.025
ENSMUSG00000026088	Mitd1	180.935	0.11303	0.198779	0.568623	0.569612	0.775277	2.605	2.527
ENSMUSG00000026087	Mrpl30	1285.77	0.312353	0.16102	1.93984	0.0523995	0.192163	36.518	30.938
ENSMUSG00000058407	Txndc9	1856.33	0.120066	0.189145	0.634785	0.525569	0.74585	32.186	30.681
ENSMUSG00000026083	Eif5b	2045.81	-0.138381	0.170222	-0.812946	0.416249	0.661535	7.516	8.541
ENSMUSG00000026082	Rev1	2317.61	-0.0352502	0.273039	-0.129103	0.897276	0.955807	6.817	7.074
ENSMUSG00000102716	Gm5099	1.5741	0.754613	1.58947	0.474759	0.634959	NA	0.012	0.008
ENSMUSG00000037138	Aff3	380.978	1.62803	0.365264	4.45715	8.3058e-06	0.000251502	0.225	0.077
ENSMUSG00000085391	Gm16150	21.0205	2.09435	0.820798	2.55161	0.0107227	0.0647862	0.846	0.224
ENSMUSG00000087131	Gm16152	2.13942	2.88155	2.72961	1.05566	0.291123	NA	0.108	0.015
ENSMUSG00000048814	Lonrf2	1474.59	-0.479804	0.31911	-1.50357	0.132692	0.344748	6.22	8.691
ENSMUSG00000026080	Chst10	304.234	0.357279	0.317068	1.12682	0.259817	0.512808	2.089	1.629
ENSMUSG00000026078	Pdcl3	969.251	0.439559	0.133027	3.30427	0.000952225	0.010787	20.65	15.989
ENSMUSG00000026077	Npas2	55.9451	2.87832	0.785169	3.66586	0.000246508	0.0036679	0.161	0.023
ENSMUSG00000073702	Rpl31	6621.44	0.544219	0.248964	2.18593	0.0288208	0.130183	393.062	285.096
ENSMUSG00000003134	Tbc1d8	7712.02	0.382986	0.275411	1.3906	0.164348	0.392442	18.08	14.277
ENSMUSG00000003135	Cnot11	828.603	0.339327	0.122217	2.77643	0.00549594	0.0402815	16.803	13.781
ENSMUSG00000085894	Gm15832	24.2433	0.39162	0.42492	0.921632	0.356721	0.608428	1.219	0.972
ENSMUSG00000048234	Rnf149	766.95	0.546733	0.161921	3.37654	0.000734045	0.00881235	7.404	5.33
ENSMUSG00000050967	Creg2	245.726	2.71411	0.759183	3.57504	0.000350173	0.00489771	3.767	0.553
ENSMUSG00000097083	D930019O06Rik	9.22701	3.32359	0.958735	3.46664	0.000526998	0.00678102	0.646	0.068
ENSMUSG00000057173	Rfx8	3.73332	-0.22109	1.01932	-0.2169	0.828287	0.923284	0.012	0.015
ENSMUSG00000026074	Map4k4	3064.31	0.473733	0.221605	2.13773	0.0325385	0.140812	5.758	4.321
ENSMUSG00000026073	Il1r2	9.14505	0.521169	0.733892	0.710144	0.477615	0.711739	0.057	0.044
ENSMUSG00000097899	Gm16894	3.73315	1.54208	1.08289	1.42403	0.154436	0.378145	0.143	0.051
ENSMUSG00000026072	Il1r1	100.469	0.118503	0.326025	0.363478	0.716248	0.862898	0.27	0.262
ENSMUSG00000070942	Il1rl2	18.5772	-0.590014	0.644778	-0.915066	0.360157	0.611612	0.085	0.139
ENSMUSG00000026069	Il1rl1	3.89072	-0.796889	1.08406	-0.735099	0.462279	0.698826	0.012	0.022
ENSMUSG00000026070	Il18r1	6.13313	-0.669925	0.946948	-0.707456	0.479283	0.712733	0.037	0.064
ENSMUSG00000026068	Il18rap	5.6497	0.0236329	0.842229	0.02806	0.977614	0.991208	0.042	0.042
ENSMUSG00000026062	Slc9a2	23.7856	-1.36836	0.840333	-1.62835	0.10345	0.294908	0.034	0.088
ENSMUSG00000041945	Mfsd9	166.573	-0.30453	0.180131	-1.6906	0.090913	0.272465	1.547	1.98
ENSMUSG00000079588	Tmem182	4.74548	1.57601	1.19653	1.31715	0.187788	0.426493	0.027	0.009
[truncated: 22,825 more rows]

## Sheet: Supplemental Table S6
Supplemental Table S6: DESeq2 output for OCR at P49 vs. P10 time-point comparison.
[truncated: 62,833 more rows]

[truncated: 12 more sheets: Supplemental Table S7, Supplemental Table S8, Supplemental Table S9, Supplemental Table S10, Supplementary Table S11, Supplemental Table S12, Supplemental Table S13, Supplemental Table S14, Supplemental Table S15, Supplemental Table S16, Supplemental Table S17, Supplemental Table S18]
